# Supplementary material for: Cyclocarya paliurus leaves alleviate high-sucrose diet-induced obesity by improving intestinal metabolic disorders
Source: Aging (Albany NY). 2024 Mar 14;16(6):5452–70. doi: 10.18632/aging.205657 (PMC11006468; doi:10.18632/aging.205657)
Supplement: Supplementary Figure 1 [file aging-16-205657-s001.pdf]

## SUPPLEMENTARY FIGURE

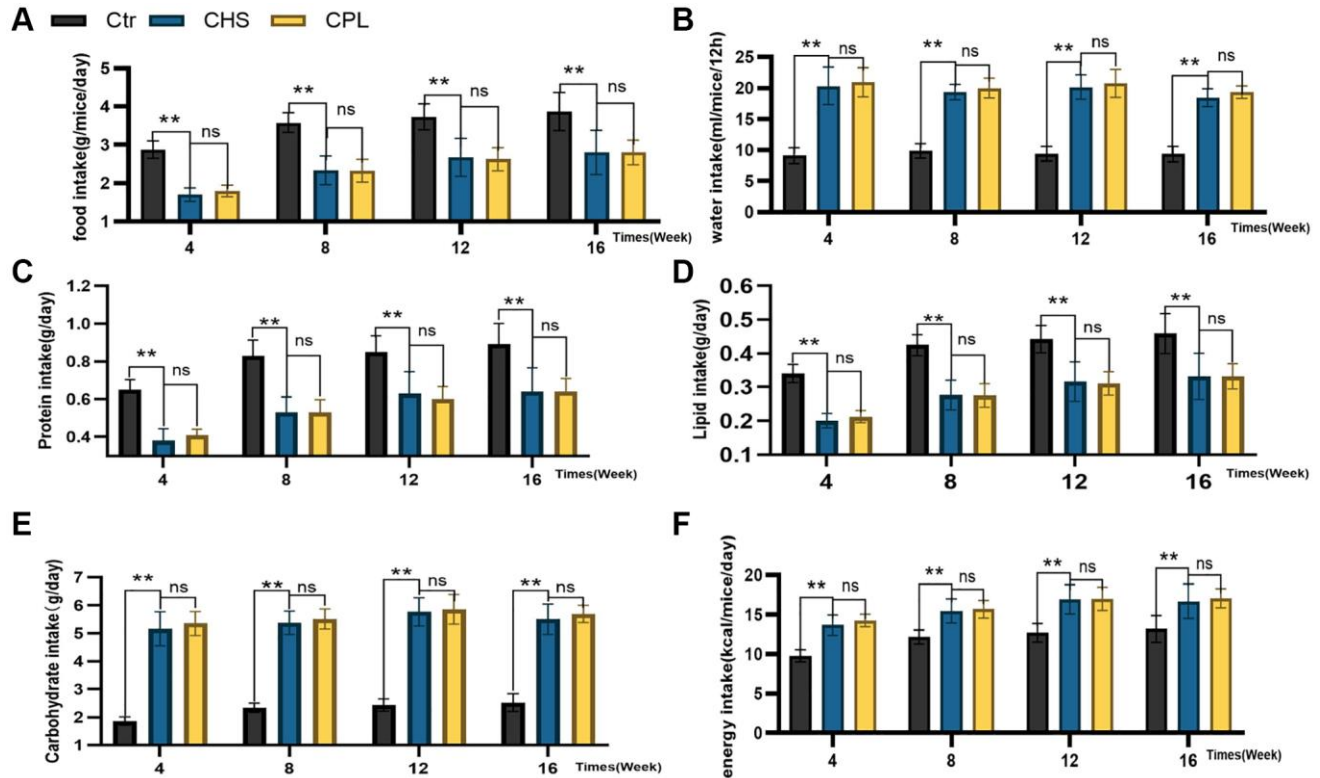

**Supplementary Figure 1. A high-sucrose diet influences energy intake.** (A) Food intake. (B) Water intake. (C) Protein intake. (D) Lipid intake. (E) Carbohydrate intake. (F) Energy intake.  $n = 10$  mice per group. The data are presented as the mean  $\pm$  SEM. Statistical analysis was performed using Student's  $t$  test. \* $p < 0.05$ , \*\* $p < 0.01$ , Abbreviation: ns: not significant.
