# Supplementary material for: Cyclocarya paliurus leaves alleviate high-sucrose diet-induced obesity by improving intestinal metabolic disorders
Source: Aging (Albany NY). 2024 Mar 14;16(6):5452–70. doi: 10.18632/aging.205657 (PMC11006468; doi:10.18632/aging.205657)
Supplement: Supplementary File 1 [file aging-16-205657-s003.xlsx]

## Sheet: Sheet1
Supplementary File 1. Data on the gut microbiota and gut metabolites.
Domain	Kingdom	Phylum	Class	Order	Family	Genus	Species	OTU	Ctr1	Ctr2	Ctr3	Ctr4	Ctr5	Ctr6	Ctr7	Ctr8	Ctr9	Ctr10	CHS1	CHS2	CHS3	CHS4	CHS5	CHS6	CHS7	CHS8	CHS9	CHS10	CPL1	CPL2	CPL3	CPL4	CPL5	CPL6	CPL7	CPL8	CPL9	CPL10
d__Bacteria	k__norank_d__Bacteria	p__Bacteroidetes	c__Bacteroidia	o__Bacteroidales	f__Muribaculaceae	g__norank_f__Muribaculaceae	s__unclassified_g__norank_f__Muribaculaceae	OTU348	2857	4006	1488	9903	1015	7381	4644	4167	5224	5158	3221	4120	6857	3215	4321	4456	4653	5211	5607	5320	1641	2315	2104	2551	1821	1520	3163	1546	2210	2268
d__Bacteria	k__norank_d__Bacteria	p__Bacteroidetes	c__Bacteroidia	o__Bacteroidales	f__Muribaculaceae	g__norank_f__Muribaculaceae	s__uncultured_organism_g__norank_f__Muribaculaceae	OTU1071	397	2014	750	814	654	2311	183	88	3739	335	5438	4496	3142	3087	4753	5885	5543	4150	2557	4157	8	2	2	10	12	11	2	7	8	5
d__Bacteria	k__norank_d__Bacteria	p__Bacteroidetes	c__Bacteroidia	o__Bacteroidales	f__Muribaculaceae	g__norank_f__Muribaculaceae	s__unclassified_g__norank_f__Muribaculaceae	OTU470	1792	81	4014	256	1140	19	103	1160	14	61	1895	2915	3554	1404	2374	2243	1621	1944	2747	1024	907	929	2309	1468	477	535	1066	822	1448	1765
d__Bacteria	k__norank_d__Bacteria	p__Epsilonbacteraeota	c__Campylobacteria	o__Campylobacterales	f__Helicobacteraceae	g__Helicobacter	s__unclassified_g__Helicobacter	OTU505	2181	537	1317	434	1738	245	885	531	182	429	1309	3141	2170	1246	2375	320	736	402	2777	4313	1429	1537	1681	2317	1738	1245	1434	885	831	1182
d__Bacteria	k__norank_d__Bacteria	p__Firmicutes	c__Clostridia	o__Clostridiales	f__Lachnospiraceae	g__Lachnospiraceae_NK4A136_group	s__unclassified_g__Lachnospiraceae_NK4A136_group	OTU457	406	448	559	307	574	774	599	280	1094	407	211	110	53	1340	333	211	751	1085	1131	676	5114	4166	1880	2109	1221	1374	1666	3354	2665	2368
d__Bacteria	k__norank_d__Bacteria	p__Bacteroidetes	c__Bacteroidia	o__Bacteroidales	f__Muribaculaceae	g__norank_f__Muribaculaceae	s__uncultured_bacterium_g__norank_f__Muribaculaceae	OTU540	597	1043	699	614	142	770	169	110	435	239	1185	1983	1328	1120	540	690	926	455	526	1154	1897	1269	1780	4663	2204	1584	244	2002	1830	2072
d__Bacteria	k__norank_d__Bacteria	p__Proteobacteria	c__Deltaproteobacteria	o__Desulfovibrionales	f__Desulfovibrionaceae	g__Desulfovibrio	s__uncultured_bacterium_g__Desulfovibrio	OTU835	1079	439	302	531	571	502	280	317	151	355	1090	160	625	590	1479	1535	638	1428	654	720	1693	1834	1801	1500	1191	1330	1214	1363	1661	1274
d__Bacteria	k__norank_d__Bacteria	p__Firmicutes	c__Clostridia	o__Clostridiales	f__Lachnospiraceae	g__Lachnospiraceae_NK4A136_group	s__Lachnospiraceae_bacterium_A4	OTU311	703	848	795	551	332	292	290	216	248	137	1193	1000	1059	1427	328	1295	1745	1087	1749	1181	1335	914	1397	1750	1654	1311	714	1183	88	1039
d__Bacteria	k__norank_d__Bacteria	p__Firmicutes	c__Clostridia	o__Clostridiales	f__Lachnospiraceae	g__Lachnospiraceae_NK4A136_group	s__uncultured_bacterium_g__Lachnospiraceae_NK4A136_group	OTU164	1722	222	103	831	880	60	29	6	43	15	1137	377	1923	1326	1000	157	755	294	332	564	1171	1210	1215	1014	1108	1216	1215	1710	2745	1021
d__Bacteria	k__norank_d__Bacteria	p__Bacteroidetes	c__Bacteroidia	o__Bacteroidales	f__Prevotellaceae	g__Alloprevotella	s__uncultured_Bacteroidales_bacterium_g__Alloprevotella	OTU153	155	901	74	872	75	484	237	75	197	352	242	2370	435	1489	253	379	577	590	94	153	1182	1441	1356	1319	1891	1098	1506	1685	1681	1122
d__Bacteria	k__norank_d__Bacteria	p__Bacteroidetes	c__Bacteroidia	o__Bacteroidales	f__Muribaculaceae	g__norank_f__Muribaculaceae	s__uncultured_bacterium_g__norank_f__Muribaculaceae	OTU716	282	404	477	362	431	304	308	262	218	75	618	1	1	2	952	546	256	255	199	285	1750	1922	1256	1270	1083	1118	1873	1293	1665	1216
d__Bacteria	k__norank_d__Bacteria	p__Bacteroidetes	c__Bacteroidia	o__Bacteroidales	f__Muribaculaceae	g__norank_f__Muribaculaceae	s__uncultured_bacterium_g__norank_f__Muribaculaceae	OTU65	187	328	665	1069	354	61	19	6	105	53	230	53	2	11	1	417	25	34	35	72	1561	1081	792	2014	1250	1905	1256	1104	1214	1541
d__Bacteria	k__norank_d__Bacteria	p__Firmicutes	c__Clostridia	o__Clostridiales	f__Lachnospiraceae	g__Lachnospiraceae_NK4A136_group	s__uncultured_bacterium_g__Lachnospiraceae_NK4A136_group	OTU748	521	177	260	96	307	89	129	326	216	263	234	521	321	443	211	550	80	226	139	197	1103	152	1214	3378	3025	85	57	35	125	12
d__Bacteria	k__norank_d__Bacteria	p__Bacteroidetes	c__Bacteroidia	o__Bacteroidales	f__Rikenellaceae	g__Alistipes	s__uncultured_bacterium_g__Alistipes	OTU453	124	74	127	622	142	69	414	339	35	320	315	257	256	298	343	267	350	1559	752	632	774	651	650	521	511	521	501	417	370	425
d__Bacteria	k__norank_d__Bacteria	p__Bacteroidetes	c__Bacteroidia	o__Bacteroidales	f__Muribaculaceae	g__norank_f__Muribaculaceae	s__uncultured_bacterium_g__norank_f__Muribaculaceae	OTU64	109	85	78	74	44	445	389	170	532	144	657	271	451	264	586	332	384	293	438	560	194	761	1090	683	689	524	588	621	154	150
d__Bacteria	k__norank_d__Bacteria	p__Proteobacteria	c__Gammaproteobacteria	o__Betaproteobacteriales	f__Burkholderiaceae	g__Parasutterella	s__uncultured_bacterium_g__Parasutterella	OTU306	311	204	297	285	193	227	121	121	101	197	626	298	645	430	573	395	867	177	320	496	552	365	651	552	521	580	531	321	308	268
d__Bacteria	k__norank_d__Bacteria	p__Bacteroidetes	c__Bacteroidia	o__Bacteroidales	f__Muribaculaceae	g__norank_f__Muribaculaceae	s__uncultured_bacterium_g__norank_f__Muribaculaceae	OTU526	0	0	0	92	0	889	311	174	6	584	1443	183	515	343	534	807	514	469	450	616	726	389	316	457	116	7	331	138	553	7
d__Bacteria	k__norank_d__Bacteria	p__Bacteroidetes	c__Bacteroidia	o__Bacteroidales	f__Bacteroidaceae	g__Bacteroides	s__unclassified_g__Bacteroides	OTU279	128	392	70	541	62	387	94	39	162	122	158	1095	418	305	42	32	229	219	276	237	411	156	1047	841	1065	860	103	399	677	322
d__Bacteria	k__norank_d__Bacteria	p__Firmicutes	c__Clostridia	o__Clostridiales	f__Lachnospiraceae	g__Lachnospiraceae_NK4A136_group	s__uncultured_bacterium_g__Lachnospiraceae_NK4A136_group	OTU992	2	122	6	1486	22	173	11	3	70	2	150	170	79	175	174	479	600	416	730	260	365	593	584	708	305	772	608	432	111	445
d__Bacteria	k__norank_d__Bacteria	p__Bacteroidetes	c__Bacteroidia	o__Bacteroidales	f__Muribaculaceae	g__norank_f__Muribaculaceae	s__uncultured_bacterium_g__norank_f__Muribaculaceae	OTU159	351	683	150	342	42	123	47	6	113	12	821	632	1451	861	278	874	1008	384	546	901	0	0	0	0	0	0	0	0	0	0
d__Bacteria	k__norank_d__Bacteria	p__Bacteroidetes	c__Bacteroidia	o__Bacteroidales	f__Muribaculaceae	g__norank_f__Muribaculaceae	s__unclassified_g__norank_f__Muribaculaceae	OTU1021	262	247	167	294	84	231	150	40	127	41	1317	443	162	528	1307	1310	288	719	738	918	0	0	0	0	0	0	1	0	0	0
d__Bacteria	k__norank_d__Bacteria	p__Bacteroidetes	c__Bacteroidia	o__Bacteroidales	f__Muribaculaceae	g__norank_f__Muribaculaceae	s__uncultured_Bacteroidales_bacterium_g__norank_f__Muribaculaceae	OTU393	164	38	151	78	96	233	239	293	30	204	463	501	512	512	547	779	308	892	278	878	294	73	150	96	242	225	198	103	103	368
d__Bacteria	k__norank_d__Bacteria	p__Bacteroidetes	c__Bacteroidia	o__Bacteroidales	f__Muribaculaceae	g__norank_f__Muribaculaceae	s__uncultured_bacterium_g__norank_f__Muribaculaceae	OTU1070	202	530	92	72	94	32	90	148	109	148	882	760	823	689	652	875	890	548	621	567	5	4	3	10	8	7	9	9	8	7
d__Bacteria	k__norank_d__Bacteria	p__Firmicutes	c__Clostridia	o__Clostridiales	f__Lachnospiraceae	g__Lachnospiraceae_NK4A136_group	s__uncultured_bacterium_g__Lachnospiraceae_NK4A136_group	OTU1093	94	110	223	205	107	111	117	245	77	121	285	140	88	147	285	490	125	560	667	349	823	109	917	187	352	301	589	387	332	115
d__Bacteria	k__norank_d__Bacteria	p__Firmicutes	c__Clostridia	o__Clostridiales	f__Ruminococcaceae	g__Ruminiclostridium	s__uncultured_bacterium_g__Ruminiclostridium	OTU13	0	0	0	1	0	248	272	25	733	123	249	264	400	366	220	225	271	771	472	253	387	258	260	320	153	407	198	621	621	210
d__Bacteria	k__norank_d__Bacteria	p__Firmicutes	c__Clostridia	o__Clostridiales	f__Lachnospiraceae	g__Lachnospiraceae_NK4A136_group	s__uncultured_bacterium_g__Lachnospiraceae_NK4A136_group	OTU617	528	83	69	346	210	37	14	23	28	19	124	42	62	101	1060	304	176	329	1176	121	244	365	204	108	321	563	321	668	168	287
d__Bacteria	k__norank_d__Bacteria	p__Firmicutes	c__Clostridia	o__Clostridiales	f__Lachnospiraceae	g__unclassified_f__Lachnospiraceae	s__unclassified_f__Lachnospiraceae	OTU383	0	132	5	228	5	0	57	426	2	427	101	244	189	194	114	275	98	130	247	121	408	445	486	431	678	351	591	381	864	268
d__Bacteria	k__norank_d__Bacteria	p__Firmicutes	c__Clostridia	o__Clostridiales	f__Lachnospiraceae	g__Lachnospiraceae_NK4A136_group	s__uncultured_bacterium_g__Lachnospiraceae_NK4A136_group	OTU299	123	309	70	106	38	184	76	145	101	56	21	2315	9	31	57	44	70	67	5	19	315	431	701	206	682	261	531	213	210	235
d__Bacteria	k__norank_d__Bacteria	p__Bacteroidetes	c__Bacteroidia	o__Bacteroidales	f__Tannerellaceae	g__Parabacteroides	s__unclassified_g__Parabacteroides	OTU439	162	269	32	98	49	21	134	217	68	129	317	587	350	210	262	223	384	297	407	286	363	265	321	288	316	290	276	308	311	317
d__Bacteria	k__norank_d__Bacteria	p__Verrucomicrobia	c__Verrucomicrobiae	o__Verrucomicrobiales	f__Akkermansiaceae	g__Akkermansia	s__unclassified_g__Akkermansia	OTU1049	103	119	262	50	58	85	251	98	124	17	49	118	235	237	0	1	44	8	5	2	1236	464	647	601	590	552	458	212	683	109
d__Bacteria	k__norank_d__Bacteria	p__Bacteroidetes	c__Bacteroidia	o__Bacteroidales	f__Prevotellaceae	g__Prevotellaceae_UCG-001	s__uncultured_bacterium_g__Prevotellaceae_UCG-001	OTU950	124	72	130	347	78	276	38	5	56	12	7	245	78	343	0	0	1	30	17	8	307	450	355	872	990	714	651	108	505	514
d__Bacteria	k__norank_d__Bacteria	p__Firmicutes	c__Clostridia	o__Clostridiales	f__Ruminococcaceae	g__Ruminiclostridium_9	s__uncultured_bacterium_g__Ruminiclostridium_9	OTU962	7	419	28	37	7	3	1	3	586	20	182	263	501	274	162	184	205	628	376	233	75	404	282	477	431	304	362	308	262	218
d__Bacteria	k__norank_d__Bacteria	p__Firmicutes	c__Clostridia	o__Clostridiales	f__Lachnospiraceae	g__Lachnospiraceae_NK4A136_group	s__uncultured_bacterium_g__Lachnospiraceae_NK4A136_group	OTU114	0	112	7	5	0	791	80	8	5	18	59	296	4	48	203	258	177	9	49	5	420	645	385	701	590	521	453	448	450	226
d__Bacteria	k__norank_d__Bacteria	p__Bacteroidetes	c__Bacteroidia	o__Bacteroidales	f__Muribaculaceae	g__norank_f__Muribaculaceae	s__uncultured_bacterium_g__norank_f__Muribaculaceae	OTU1090	13	5	99	6	1	131	38	27	1	696	121	43	103	74	153	114	196	93	103	145	437	524	603	483	651	421	755	208	299	213
d__Bacteria	k__norank_d__Bacteria	p__Firmicutes	c__Clostridia	o__Clostridiales	f__Lachnospiraceae	g__unclassified_f__Lachnospiraceae	s__unclassified_f__Lachnospiraceae	OTU445	64	122	76	98	37	119	208	152	63	54	116	35	150	147	156	131	134	293	102	99	225	412	268	510	533	521	621	510	542	151
d__Bacteria	k__norank_d__Bacteria	p__Firmicutes	c__Clostridia	o__Clostridiales	f__Lachnospiraceae	g__Lachnospiraceae_NK4A136_group	s__uncultured_bacterium_g__Lachnospiraceae_NK4A136_group	OTU276	17	37	10	67	8	519	113	31	40	115	446	20	140	468	413	176	1013	201	18	224	153	181	117	145	151	413	162	215	231	142
d__Bacteria	k__norank_d__Bacteria	p__Firmicutes	c__Clostridia	o__Clostridiales	f__Lachnospiraceae	g__unclassified_f__Lachnospiraceae	s__unclassified_f__Lachnospiraceae	OTU347	0	200	6	40	2	32	283	30	98	256	26	364	28	57	40	20	64	24	139	109	322	408	308	501	541	360	621	134	177	108
d__Bacteria	k__norank_d__Bacteria	p__Bacteroidetes	c__Bacteroidia	o__Bacteroidales	f__Muribaculaceae	g__norank_f__Muribaculaceae	s__uncultured_bacterium_g__norank_f__Muribaculaceae	OTU685	125	178	58	217	42	12	53	92	3	145	14	468	762	509	124	63	536	152	110	124	155	108	210	88	76	203	208	82	182	83
d__Bacteria	k__norank_d__Bacteria	p__Firmicutes	c__Clostridia	o__Clostridiales	f__Ruminococcaceae	g__norank_f__Ruminococcaceae	s__unclassified_g__norank_f__Ruminococcaceae	OTU404	0	320	57	18	0	318	86	10	60	11	103	151	111	50	129	42	125	635	257	76	176	257	202	288	210	348	163	254	189	234
d__Bacteria	k__norank_d__Bacteria	p__Firmicutes	c__Clostridia	o__Clostridiales	f__Ruminococcaceae	g__Oscillibacter	s__[Clostridium]_leptum_g__Oscillibacter	OTU960	169	0	426	5	148	4	19	92	1	4	157	91	243	228	166	72	119	458	263	274	151	220	192	309	245	177	219	110	85	129
d__Bacteria	k__norank_d__Bacteria	p__Patescibacteria	c__Saccharimonadia	o__Saccharimonadales	f__Saccharimonadaceae	g__Candidatus_Saccharimonas	s__uncultured_bacterium_g__Candidatus_Saccharimonas	OTU211	112	164	138	22	126	131	42	15	62	14	78	37	41	49	156	187	117	140	144	62	105	504	142	312	258	249	312	255	267	305
d__Bacteria	k__norank_d__Bacteria	p__Firmicutes	c__Clostridia	o__Clostridiales	f__Lachnospiraceae	g__Lachnoclostridium	s__Dorea_sp._5-2	OTU169	147	121	186	105	106	22	13	31	4	87	180	133	89	103	196	184	134	197	263	135	180	166	199	151	514	108	431	95	70	81
d__Bacteria	k__norank_d__Bacteria	p__Firmicutes	c__Clostridia	o__Clostridiales	f__Lachnospiraceae	g__Lachnospiraceae_NK4A136_group	s__uncultured_bacterium_g__Lachnospiraceae_NK4A136_group	OTU351	76	40	66	196	58	113	87	94	24	46	69	342	2	204	226	194	193	198	45	85	220	214	118	142	151	164	321	313	211	125
d__Bacteria	k__norank_d__Bacteria	p__Bacteroidetes	c__Bacteroidia	o__Bacteroidales	f__Muribaculaceae	g__norank_f__Muribaculaceae	s__uncultured_Bacteroidales_bacterium_g__norank_f__Muribaculaceae	OTU471	38	40	8	46	17	211	119	27	238	53	183	213	138	162	184	141	301	131	99	142	144	108	109	107	89	325	101	223	271	321
d__Bacteria	k__norank_d__Bacteria	p__Firmicutes	c__Clostridia	o__Clostridiales	f__Lachnospiraceae	g__Lachnospiraceae_NK4A136_group	s__uncultured_bacterium_g__Lachnospiraceae_NK4A136_group	OTU645	115	117	68	133	46	101	53	63	46	53	8	92	25	31	23	14	39	33	100	35	169	328	187	665	253	260	255	221	208	305
d__Bacteria	k__norank_d__Bacteria	p__Bacteroidetes	c__Bacteroidia	o__Bacteroidales	f__Muribaculaceae	g__norank_f__Muribaculaceae	s__uncultured_bacterium_g__norank_f__Muribaculaceae	OTU523	63	119	161	94	37	56	80	101	41	18	217	202	98	544	80	158	140	832	62	98	65	83	53	66	32	108	103	121	30	45
d__Bacteria	k__norank_d__Bacteria	p__Bacteroidetes	c__Bacteroidia	o__Bacteroidales	f__Muribaculaceae	g__Muribaculum	s__uncultured_bacterium_g__Muribaculum	OTU1016	19	12	22	465	22	16	44	102	34	20	378	546	366	225	328	265	328	93	213	297	1	0	1	1	0	1	0	0	0	0
d__Bacteria	k__norank_d__Bacteria	p__Firmicutes	c__Clostridia	o__Clostridiales	f__Lachnospiraceae	g__Lachnospiraceae_NK4A136_group	s__unclassified_g__Lachnospiraceae_NK4A136_group	OTU731	40	21	20	163	40	26	193	132	14	93	44	152	85	110	205	86	164	112	61	51	131	215	122	251	255	187	301	195	162	150
d__Bacteria	k__norank_d__Bacteria	p__Firmicutes	c__Clostridia	o__Clostridiales	f__Ruminococcaceae	g__Ruminiclostridium_9	s__uncultured_bacterium_g__Ruminiclostridium_9	OTU86	14	32	144	41	10	12	352	66	12	54	78	140	129	110	376	79	162	167	126	82	152	208	109	320	125	87	221	96	99	89
d__Bacteria	k__norank_d__Bacteria	p__Firmicutes	c__Clostridia	o__Clostridiales	f__Lachnospiraceae	g__Blautia	s__unclassified_g__Blautia	OTU640	46	287	86	6	51	222	10	0	17	8	128	21	122	119	1055	282	153	57	39	2	18	210	21	67	11	218	52	110	109	78
d__Bacteria	k__norank_d__Bacteria	p__Bacteroidetes	c__Bacteroidia	o__Bacteroidales	f__Muribaculaceae	g__norank_f__Muribaculaceae	s__unclassified_g__norank_f__Muribaculaceae	OTU1029	180	36	43	23	355	18	27	30	18	2	249	145	353	258	365	297	425	164	3	132	68	69	45	58	63	25	59	22	36	18
d__Bacteria	k__norank_d__Bacteria	p__Firmicutes	c__Clostridia	o__Clostridiales	f__Ruminococcaceae	g__Ruminococcaceae_UCG-014	s__uncultured_bacterium_g__Ruminococcaceae_UCG-014	OTU504	4	103	9	69	4	42	92	320	9	38	76	1	1	32	18	55	222	57	39	204	755	12	259	83	26	109	15	115	342	332
d__Bacteria	k__norank_d__Bacteria	p__Bacteroidetes	c__Bacteroidia	o__Bacteroidales	f__Muribaculaceae	g__norank_f__Muribaculaceae	s__uncultured_bacterium_g__norank_f__Muribaculaceae	OTU842	1	0	1	0	3	95	121	4	369	66	414	1	10	5	440	860	117	166	132	445	1	0	1	0	0	0	1	0	0	0
d__Bacteria	k__norank_d__Bacteria	p__Bacteroidetes	c__Bacteroidia	o__Bacteroidales	f__Muribaculaceae	g__norank_f__Muribaculaceae	s__uncultured_Bacteroidales_bacterium_g__norank_f__Muribaculaceae	OTU278	9	8	82	2	23	446	65	1	4	19	637	6	2	5	273	482	61	333	381	392	0	1	1	0	0	0	1	0	0	0
d__Bacteria	k__norank_d__Bacteria	p__Bacteroidetes	c__Bacteroidia	o__Bacteroidales	f__Muribaculaceae	g__norank_f__Muribaculaceae	s__unclassified_g__norank_f__Muribaculaceae	OTU369	0	3	286	5	2	186	118	2	44	2	74	61	288	164	31	29	110	67	4	113	221	195	208	151	121	131	108	101	221	151
d__Bacteria	k__norank_d__Bacteria	p__Firmicutes	c__Clostridia	o__Clostridiales	f__Lachnospiraceae	g__norank_f__Lachnospiraceae	s__unclassified_g__norank_f__Lachnospiraceae	OTU368	0	0	0	0	0	54	34	7	40	506	9	92	155	92	115	35	43	69	55	67	121	220	115	235	80	213	303	225	150	147
d__Bacteria	k__norank_d__Bacteria	p__Firmicutes	c__Clostridia	o__Clostridiales	f__Lachnospiraceae	g__Lachnospiraceae_NK4A136_group	s__uncultured_bacterium_g__Lachnospiraceae_NK4A136_group	OTU74	0	0	0	1	0	137	99	7	334	47	63	169	45	109	17	139	111	200	2	96	166	208	152	108	138	165	211	154	121	121
d__Bacteria	k__norank_d__Bacteria	p__Firmicutes	c__Clostridia	o__Clostridiales	f__Lachnospiraceae	g__Lachnospiraceae_NK4A136_group	s__uncultured_bacterium_g__Lachnospiraceae_NK4A136_group	OTU1091	111	22	224	13	134	1	20	60	0	34	87	180	10	126	93	111	237	90	483	770	15	10	12	29	12	124	8	40	28	25
d__Bacteria	k__norank_d__Bacteria	p__Bacteroidetes	c__Bacteroidia	o__Bacteroidales	f__Muribaculaceae	g__norank_f__Muribaculaceae	s__uncultured_bacterium_g__norank_f__Muribaculaceae	OTU592	98	127	72	53	28	51	34	37	42	52	252	244	196	130	397	298	253	186	151	356	2	0	1	1	0	0	0	0	0	0
d__Bacteria	k__norank_d__Bacteria	p__Firmicutes	c__Clostridia	o__Clostridiales	f__Lachnospiraceae	g__Lachnospiraceae_NK4A136_group	s__Clostridiales_bacterium_CIEAF_020	OTU221	1	65	2	17	0	0	311	172	4	21	196	94	59	148	23	228	80	440	269	204	108	110	151	25	45	46	33	36	120	18
d__Bacteria	k__norank_d__Bacteria	p__Firmicutes	c__Clostridia	o__Clostridiales	f__Ruminococcaceae	g__Ruminiclostridium_6	s__uncultured_bacterium_g__Ruminiclostridium_6	OTU911	51	141	65	98	72	2	46	49	20	15	27	2	245	177	225	27	123	53	66	76	213	220	151	151	105	85	120	67	121	45
d__Bacteria	k__norank_d__Bacteria	p__Bacteroidetes	c__Bacteroidia	o__Bacteroidales	f__Muribaculaceae	g__norank_f__Muribaculaceae	s__uncultured_bacterium_g__norank_f__Muribaculaceae	OTU625	0	2	1	2	0	115	95	4	282	35	67	123	166	108	64	31	92	18	0	49	204	38	164	151	96	233	78	239	293	30
d__Bacteria	k__norank_d__Bacteria	p__Firmicutes	c__Clostridia	o__Clostridiales	f__Lachnospiraceae	g__unclassified_f__Lachnospiraceae	s__unclassified_f__Lachnospiraceae	OTU104	85	11	19	12	31	145	48	67	58	51	30	56	427	294	25	51	121	30	30	17	55	65	108	121	68	176	145	200	112	108
d__Bacteria	k__norank_d__Bacteria	p__Bacteroidetes	c__Bacteroidia	o__Bacteroidales	f__Muribaculaceae	g__norank_f__Muribaculaceae	s__unclassified_g__norank_f__Muribaculaceae	OTU980	10	80	118	42	9	51	83	74	41	12	185	226	207	141	133	93	129	119	58	78	83	98	85	108	99	66	95	51	75	65
d__Bacteria	k__norank_d__Bacteria	p__Bacteroidetes	c__Bacteroidia	o__Bacteroidales	f__Muribaculaceae	g__norank_f__Muribaculaceae	s__uncultured_bacterium_g__norank_f__Muribaculaceae	OTU357	38	61	43	64	57	40	48	39	32	26	6	0	8	6	2	0	3	2	5	0	297	204	311	197	193	227	185	221	121	201
d__Bacteria	k__norank_d__Bacteria	p__Firmicutes	c__Clostridia	o__Clostridiales	f__Lachnospiraceae	g__unclassified_f__Lachnospiraceae	s__unclassified_f__Lachnospiraceae	OTU198	29	67	36	35	40	76	25	15	106	12	160	307	73	46	17	431	266	17	37	196	21	82	1	2	0	132	8	182	108	101
d__Bacteria	k__norank_d__Bacteria	p__Bacteroidetes	c__Bacteroidia	o__Bacteroidales	f__Muribaculaceae	g__norank_f__Muribaculaceae	s__uncultured_bacterium_g__norank_f__Muribaculaceae	OTU286	5	31	3	51	23	25	52	146	13	83	220	365	175	380	179	175	270	244	65	98	0	0	0	0	0	0	1	0	0	0
d__Bacteria	k__norank_d__Bacteria	p__Firmicutes	c__Clostridia	o__Clostridiales	f__Lachnospiraceae	g__norank_f__Lachnospiraceae	s__unclassified_g__norank_f__Lachnospiraceae	OTU418	30	31	81	56	32	27	82	18	34	39	39	97	52	74	31	38	42	54	148	18	208	153	121	168	156	148	121	156	100	211
d__Bacteria	k__norank_d__Bacteria	p__Bacteroidetes	c__Bacteroidia	o__Bacteroidales	f__Muribaculaceae	g__norank_f__Muribaculaceae	s__uncultured_bacterium_g__norank_f__Muribaculaceae	OTU871	2	345	16	33	2	3	3	1	10	5	512	2	3	3	231	457	225	100	165	428	0	0	2	1	0	0	0	0	0	0
d__Bacteria	k__norank_d__Bacteria	p__Bacteroidetes	c__Bacteroidia	o__Bacteroidales	f__Muribaculaceae	g__norank_f__Muribaculaceae	s__uncultured_organism_g__norank_f__Muribaculaceae	OTU755	37	30	16	113	12	96	14	28	36	34	211	134	332	223	313	264	374	138	1	121	0	0	1	0	1	0	1	0	0	0
d__Bacteria	k__norank_d__Bacteria	p__Bacteroidetes	c__Bacteroidia	o__Bacteroidales	f__Muribaculaceae	g__norank_f__Muribaculaceae	s__uncultured_bacterium_g__norank_f__Muribaculaceae	OTU402	8	9	4	16	0	125	80	18	134	18	145	90	43	169	125	199	155	200	39	82	110	65	120	54	70	98	65	101	54	121
d__Bacteria	k__norank_d__Bacteria	p__Firmicutes	c__Clostridia	o__Clostridiales	f__Lachnospiraceae	g__norank_f__Lachnospiraceae	s__unclassified_g__norank_f__Lachnospiraceae	OTU932	51	51	75	36	114	30	7	4	18	23	150	39	135	89	164	137	76	89	63	116	165	152	125	109	69	98	89	90	88	58
d__Bacteria	k__norank_d__Bacteria	p__Firmicutes	c__Clostridia	o__Clostridiales	f__Peptococcaceae	g__norank_f__Peptococcaceae	s__unclassified_g__norank_f__Peptococcaceae	OTU737	136	5	78	34	33	14	37	22	1	31	102	137	126	135	70	91	93	155	73	85	92	97	88	121	98	18	188	99	151	78
d__Bacteria	k__norank_d__Bacteria	p__Firmicutes	c__Clostridia	o__Clostridiales	f__Lachnospiraceae	g__Lachnospiraceae_NK4A136_group	s__Lachnospiraceae_bacterium_A4	OTU539	0	35	6	6	0	196	60	1	68	8	11	12	0	49	73	40	116	8	117	28	120	177	151	164	108	145	123	212	108	321
d__Bacteria	k__norank_d__Bacteria	p__Firmicutes	c__Clostridia	o__Clostridiales	f__Lachnospiraceae	g__Roseburia	s__unclassified_g__Roseburia	OTU1065	90	52	38	11	87	2	29	38	3	24	3	73	2	49	0	3	20	9	25	4	320	132	303	211	28	178	151	110	212	238
d__Bacteria	k__norank_d__Bacteria	p__Firmicutes	c__Clostridia	o__Clostridiales	f__Lachnospiraceae	g__Blautia	s__Lachnospiraceae_bacterium_DW59	OTU263	213	17	17	29	40	23	7	4	2	8	133	233	6	31	4	23	130	169	167	91	124	65	123	76	121	54	165	155	68	125
d__Bacteria	k__norank_d__Bacteria	p__Firmicutes	c__Clostridia	o__Clostridiales	f__Lachnospiraceae	g__Lachnospiraceae_NK4A136_group	s__uncultured_bacterium_g__Lachnospiraceae_NK4A136_group	OTU956	115	3	170	3	44	1	0	15	0	1	10	541	8	26	21	28	42	28	16	16	121	141	145	165	119	109	125	108	121	150
d__Bacteria	k__norank_d__Bacteria	p__Firmicutes	c__Clostridia	o__Clostridiales	f__Lachnospiraceae	g__Roseburia	s__unclassified_g__Roseburia	OTU467	53	50	28	66	19	25	26	20	27	28	149	5	9	604	34	221	101	680	27	5	14	11	11	37	13	18	17	10	28	19
d__Bacteria	k__norank_d__Bacteria	p__Bacteroidetes	c__Bacteroidia	o__Bacteroidales	f__Muribaculaceae	g__norank_f__Muribaculaceae	s__uncultured_bacterium_g__norank_f__Muribaculaceae	OTU560	53	9	49	17	17	34	22	35	13	83	13	0	39	20	0	1	3	9	6	6	195	250	169	121	206	155	154	165	208	252
d__Bacteria	k__norank_d__Bacteria	p__Bacteroidetes	c__Bacteroidia	o__Bacteroidales	f__Muribaculaceae	g__norank_f__Muribaculaceae	s__unclassified_g__norank_f__Muribaculaceae	OTU96	0	0	0	0	0	0	154	48	63	53	42	92	108	60	46	29	66	68	66	56	190	129	139	106	88	107	79	203	149	138
d__Bacteria	k__norank_d__Bacteria	p__Firmicutes	c__Clostridia	o__Clostridiales	f__Lachnospiraceae	g__Lachnoclostridium	s__uncultured_bacterium_g__Lachnoclostridium	OTU937	30	8	41	26	20	120	5	3	59	5	146	168	49	146	54	198	37	311	203	148	51	41	45	35	30	36	45	46	46	33
d__Bacteria	k__norank_d__Bacteria	p__Bacteroidetes	c__Bacteroidia	o__Bacteroidales	f__Muribaculaceae	g__norank_f__Muribaculaceae	s__uncultured_bacterium_g__norank_f__Muribaculaceae	OTU367	2	186	17	19	4	9	70	2	6	1	46	25	14	18	61	71	32	16	12	17	148	530	202	92	94	32	72	90	148	109
d__Bacteria	k__norank_d__Bacteria	p__Firmicutes	c__Clostridia	o__Clostridiales	f__Ruminococcaceae	g__norank_f__Ruminococcaceae	s__unclassified_g__norank_f__Ruminococcaceae	OTU691	65	71	49	45	26	1	0	15	0	34	42	56	108	88	56	66	53	49	79	59	117	119	103	162	88	85	86	151	98	124
d__Bacteria	k__norank_d__Bacteria	p__Firmicutes	c__Clostridia	o__Clostridiales	f__Ruminococcaceae	g__Intestinimonas	s__uncultured_bacterium_g__Intestinimonas	OTU491	37	65	70	72	55	1	0	2	0	0	88	92	125	92	110	60	98	112	105	128	38	89	67	92	78	99	94	80	68	68
d__Bacteria	k__norank_d__Bacteria	p__Firmicutes	c__Clostridia	o__Clostridiales	f__Ruminococcaceae	g__Ruminiclostridium_9	s__unclassified_g__Ruminiclostridium_9	OTU779	14	137	49	23	7	54	8	1	6	1	60	97	61	64	118	98	81	192	97	86	79	108	88	78	89	99	90	55	78	58
d__Bacteria	k__norank_d__Bacteria	p__Firmicutes	c__Clostridia	o__Clostridiales	f__Lachnospiraceae	g__norank_f__Lachnospiraceae	s__unclassified_g__norank_f__Lachnospiraceae	OTU100	0	35	0	7	0	15	94	8	56	78	51	103	54	101	46	46	52	39	92	82	85	108	72	88	137	119	90	108	152	55
d__Bacteria	k__norank_d__Bacteria	p__Bacteroidetes	c__Bacteroidia	o__Bacteroidales	f__Rikenellaceae	g__Rikenella	s__uncultured_bacterium_g__Rikenella	OTU433	1	28	5	41	1	81	68	19	32	6	62	178	138	107	67	162	82	186	95	101	64	64	50	36	37	55	59	27	65	26
d__Bacteria	k__norank_d__Bacteria	p__Bacteroidetes	c__Bacteroidia	o__Bacteroidales	f__Bacteroidaceae	g__Bacteroides	s__Bacteroides_acidifaciens	OTU762	33	23	51	4	112	5	16	27	2	5	114	146	159	114	96	98	108	82	72	108	45	85	32	60	45	66	51	68	32	80
d__Bacteria	k__norank_d__Bacteria	p__Firmicutes	c__Clostridia	o__Clostridiales	f__Lachnospiraceae	g__Lachnospiraceae_NK4A136_group	s__uncultured_bacterium_g__Lachnospiraceae_NK4A136_group	OTU1103	5	35	45	2	7	106	41	9	5	18	108	69	92	102	53	29	99	91	110	130	20	112	52	43	61	36	165	44	102	134
d__Bacteria	k__norank_d__Bacteria	p__Bacteroidetes	c__Bacteroidia	o__Bacteroidales	f__Muribaculaceae	g__norank_f__Muribaculaceae	s__unclassified_g__norank_f__Muribaculaceae	OTU633	11	17	2	14	3	90	18	10	98	7	46	95	119	82	21	18	34	31	8	76	135	121	112	120	131	100	105	64	106	115
d__Bacteria	k__norank_d__Bacteria	p__Firmicutes	c__Clostridia	o__Clostridiales	f__Ruminococcaceae	g__unclassified_f__Ruminococcaceae	s__unclassified_f__Ruminococcaceae	OTU77	17	80	56	6	14	23	15	18	35	5	70	135	178	145	57	61	101	31	89	73	60	65	45	86	66	65	85	44	45	78
d__Bacteria	k__norank_d__Bacteria	p__Bacteroidetes	c__Bacteroidia	o__Bacteroidales	f__Muribaculaceae	g__norank_f__Muribaculaceae	s__uncultured_bacterium_g__norank_f__Muribaculaceae	OTU113	66	49	2	11	49	51	5	0	15	20	21	24	87	52	17	25	59	25	15	31	89	167	79	52	147	156	98	128	118	150
d__Bacteria	k__norank_d__Bacteria	p__Firmicutes	c__Clostridia	o__Clostridiales	f__Lachnospiraceae	g__Lachnospiraceae_UCG-006	s__uncultured_bacterium_g__Lachnospiraceae_UCG-006	OTU498	1	35	1	39	2	60	61	14	29	10	29	23	108	65	136	38	64	98	125	29	56	65	88	70.2	88	103	96	112	115	24
d__Bacteria	k__norank_d__Bacteria	p__Bacteroidetes	c__Bacteroidia	o__Bacteroidales	f__Muribaculaceae	g__norank_f__Muribaculaceae	s__uncultured_bacterium_g__norank_f__Muribaculaceae	OTU903	11	46	6	74	2	40	19	14	8	32	38	90	126	59	38	34	26	28	24	67	110	56	199	63	125	114	15	68	108	112
d__Bacteria	k__norank_d__Bacteria	p__Bacteroidetes	c__Bacteroidia	o__Bacteroidales	f__Muribaculaceae	g__norank_f__Muribaculaceae	s__uncultured_bacterium_g__norank_f__Muribaculaceae	OTU1044	0	0	0	0	0	162	78	0	7	1	136	175	221	181	74	152	214	65	88	178	0	1	0	0	0	0	0	1	0	0
d__Bacteria	k__norank_d__Bacteria	p__Firmicutes	c__Clostridia	o__Clostridiales	f__Lachnospiraceae	g__norank_f__Lachnospiraceae	s__unclassified_g__norank_f__Lachnospiraceae	OTU723	21	33	21	21	6	97	3	7	20	18	29	198	14	30	113	40	48	33	18	28	58	105	67	98	108	145	56	89	65	88
d__Bacteria	k__norank_d__Bacteria	p__Firmicutes	c__Clostridia	o__Clostridiales	f__Ruminococcaceae	g__Oscillibacter	s__uncultured_bacterium_g__Oscillibacter	OTU701	4	14	47	19	53	20	7	16	62	5	16	284	98	35	11	10	14	29	97	35	62	55	95	42	106	158	83	105	33	27
d__Bacteria	k__norank_d__Bacteria	p__Firmicutes	c__Clostridia	o__Clostridiales	f__Ruminococcaceae	g__Ruminococcaceae_UCG-004	s__uncultured_bacterium_g__Ruminococcaceae_UCG-004	OTU650	50	55	23	41	15	7	7	22	0	24	93	64	41	47	96	66	37	144	68	78	56	63	87	58	55	65	69	58	69	54
d__Bacteria	k__norank_d__Bacteria	p__Bacteroidetes	c__Bacteroidia	o__Bacteroidales	f__Bacteroidaceae	g__Bacteroides	s__Bacteroides_sartorii	OTU303	21	22	119	6	11	11	16	5	29	3	44	28	27	24	33	37	36	27	273	73	109	59	86	68	78	56	66	68	89	85
d__Bacteria	k__norank_d__Bacteria	p__Firmicutes	c__Clostridia	o__Clostridiales	f__Lachnospiraceae	g__Lachnospiraceae_NK4A136_group	s__uncultured_Clostridiales_bacterium_g__Lachnospiraceae_NK4A136_group	OTU1083	42	13	76	8	80	5	3	0	2	6	43	67	15	47	156	129	132	75	7	44	56	68	108	82	15	116	4	155	25	5
d__Bacteria	k__norank_d__Bacteria	p__Firmicutes	c__Clostridia	o__Clostridiales	f__Lachnospiraceae	g__Lachnospiraceae_NK4A136_group	s__unclassified_g__Lachnospiraceae_NK4A136_group	OTU541	0	101	11	8	0	24	67	1	3	1	10	3	4	64	39	22	67	77	37	29	89	134	128	85	75	115	141	100	51	44
d__Bacteria	k__norank_d__Bacteria	p__Firmicutes	c__Clostridia	o__Clostridiales	f__Ruminococcaceae	g__Ruminiclostridium_5	s__Ruminiclostridium_sp._KB18	OTU15	74	7	19	1	47	3	14	35	0	10	26	6	15	16	36	5	5	86	31	65	27	109	99	251	29	123	155	105	55	67
d__Bacteria	k__norank_d__Bacteria	p__Firmicutes	c__Clostridia	o__Clostridiales	f__Ruminococcaceae	g__Anaerotruncus	s__uncultured_bacterium_g__Anaerotruncus	OTU626	5	54	7	10	2	55	21	2	38	15	37	84	78	86	155	85	95	88	67	90	8	102	68	51	44	79	68	7	5	12
d__Bacteria	k__norank_d__Bacteria	p__Firmicutes	c__Clostridia	o__Clostridiales	f__Lachnospiraceae	g__Lachnospiraceae_NK4A136_group	s__Lachnospiraceae_bacterium_COE1	OTU32	28	27	29	3	11	56	40	0	6	0	16	66	5	10	44	25	112	27	4	12	117	432	64	84	53	181	8	15	0	32
d__Bacteria	k__norank_d__Bacteria	p__Firmicutes	c__Erysipelotrichia	o__Erysipelotrichales	f__Erysipelotrichaceae	g__Ileibacterium	s__Ileibacterium_valens	OTU1050	14	5	5	14	9	12	24	48	1	54	70	26	74	87	141	91	57	111	272	65	33	58	39	20	9	3	14	14	116	2
d__Bacteria	k__norank_d__Bacteria	p__Bacteroidetes	c__Bacteroidia	o__Bacteroidales	f__Muribaculaceae	g__norank_f__Muribaculaceae	s__uncultured_bacterium_g__norank_f__Muribaculaceae	OTU412	8	5	17	10	7	13	20	73	7	22	5	0	0	0	0	0	0	1	1	1	239	136	55	70	115	178	75	154	121	134
d__Bacteria	k__norank_d__Bacteria	p__Firmicutes	c__Clostridia	o__Clostridiales	f__Ruminococcaceae	g__Ruminiclostridium	s__uncultured_bacterium_g__Ruminiclostridium	OTU947	36	3	63	4	50	1	3	16	0	4	38	35	71	48	33	14	27	30	93	31	16	54	65	155	202	21	56	63	105	115
d__Bacteria	k__norank_d__Bacteria	p__Firmicutes	c__Clostridia	o__Clostridiales	f__Lachnospiraceae	g__unclassified_f__Lachnospiraceae	s__unclassified_f__Lachnospiraceae	OTU974	1	11	37	57	3	8	10	28	9	14	13	0	0	0	0	0	0	0	3	0	184	121	55	131	102	89	92	201	174	105
d__Bacteria	k__norank_d__Bacteria	p__Bacteroidetes	c__Bacteroidia	o__Bacteroidales	f__Muribaculaceae	g__norank_f__Muribaculaceae	s__uncultured_bacterium_g__norank_f__Muribaculaceae	OTU658	36	32	24	28	27	2	3	17	2	6	160	22	8	63	112	107	56	359	60	63	10	25	17	16	55	25	12	25	20	32
d__Bacteria	k__norank_d__Bacteria	p__Bacteroidetes	c__Bacteroidia	o__Bacteroidales	f__Muribaculaceae	g__norank_f__Muribaculaceae	s__uncultured_bacterium_g__norank_f__Muribaculaceae	OTU870	7	6	0	49	2	27	36	8	23	14	234	1	82	170	76	157	189	184	1	139	0	0	1	0	0	0	0	0	0	0
d__Bacteria	k__norank_d__Bacteria	p__Firmicutes	c__Clostridia	o__Clostridiales	f__Ruminococcaceae	g__Ruminiclostridium_5	s__uncultured_bacterium_g__Ruminiclostridium_5	OTU1082	9	11	17	17	5	30	28	4	20	30	54	92	51	53	40	43	51	56	153	38	45	66	57	90	65	69	57	79	28	45
d__Bacteria	k__norank_d__Bacteria	p__Firmicutes	c__Clostridia	o__Clostridiales	f__Lachnospiraceae	g__[Eubacterium]_xylanophilum_group	s__uncultured_bacterium_g__[Eubacterium]_xylanophilum_group	OTU593	3	12	12	29	1	76	8	0	15	2	34	1	4	10	23	4	51	19	34	47	99	108	154	98	121	108	78	59	89	85
d__Bacteria	k__norank_d__Bacteria	p__Bacteroidetes	c__Bacteroidia	o__Bacteroidales	f__Muribaculaceae	g__norank_f__Muribaculaceae	s__unclassified_g__norank_f__Muribaculaceae	OTU161	22	39	29	5	24	1	11	11	0	13	117	99	238	143	69	77	127	114	3	203	1	3	3	1	1	0	1	1	3	0
d__Bacteria	k__norank_d__Bacteria	p__Bacteroidetes	c__Bacteroidia	o__Bacteroidales	f__Muribaculaceae	g__norank_f__Muribaculaceae	s__uncultured_bacterium_g__norank_f__Muribaculaceae	OTU374	0	6	0	18	0	91	5	9	21	1	19	25	115	66	16	12	53	15	0	34	101	95	152	35	50	29	79	111	119	59
d__Bacteria	k__norank_d__Bacteria	p__Epsilonbacteraeota	c__Campylobacteria	o__Campylobacterales	f__Helicobacteraceae	g__Helicobacter	s__Helicobacter_ganmani	OTU781	29	8	19	6	23	15	21	11	17	1	56	66	10	25	69	37	49	25	267	520	3	0	1	0	0	0	0	10	15	9
d__Bacteria	k__norank_d__Bacteria	p__Bacteroidetes	c__Bacteroidia	o__Bacteroidales	f__Muribaculaceae	g__norank_f__Muribaculaceae	s__unclassified_g__norank_f__Muribaculaceae	OTU584	8	36	2	42	4	13	21	2	7	12	20	0	0	0	64	25	9	11	0	13	122	195	105	65	78	63	152	85	78	65
d__Bacteria	k__norank_d__Bacteria	p__Firmicutes	c__Clostridia	o__Clostridiales	f__Ruminococcaceae	g__Ruminiclostridium	s__uncultured_bacterium_g__Ruminiclostridium	OTU449	17	13	4	20	4	14	18	13	20	22	98	128	81	62	46	28	32	30	89	48	51	79	15	65	16	55	60	52	45	50
d__Bacteria	k__norank_d__Bacteria	p__Actinobacteria	c__Actinobacteria	o__Coriobacteriales	f__Atopobiaceae	g__Coriobacteriaceae_UCG-002	s__uncultured_bacterium_g__Coriobacteriaceae_UCG-002	OTU661	36	3	44	10	10	1	5	32	0	1	11	0	0	0	0	1	0	0	2	0	173	96	121	117	76	107	68	98	188	56
d__Bacteria	k__norank_d__Bacteria	p__Bacteroidetes	c__Bacteroidia	o__Bacteroidales	f__Muribaculaceae	g__norank_f__Muribaculaceae	s__uncultured_bacterium_g__norank_f__Muribaculaceae	OTU606	2	5	13	8	2	31	17	13	18	32	9	5	25	8	23	9	14	6	0	10	89	59	69	65	135	115	88	125	98	150
d__Bacteria	k__norank_d__Bacteria	p__Firmicutes	c__Clostridia	o__Clostridiales	f__Lachnospiraceae	g__GCA-900066575	s__uncultured_bacterium_g__GCA-900066575	OTU460	11	33	65	9	3	0	0	18	0	0	51	39	25	41	15	94	37	32	31	42	60	45	51	78	50	32	55	151	86	54
d__Bacteria	k__norank_d__Bacteria	p__Firmicutes	c__Bacilli	o__Lactobacillales	f__Lactobacillaceae	g__Lactobacillus	s__unclassified_g__Lactobacillus	OTU324	22	6	11	17	6	9	4	2	5	57	126	51	52	89	19	32	174	28	21	14	59	69	79	50	36	25	68	55	0	6
d__Bacteria	k__norank_d__Bacteria	p__Bacteroidetes	c__Bacteroidia	o__Bacteroidales	f__Muribaculaceae	g__norank_f__Muribaculaceae	s__uncultured_bacterium_g__norank_f__Muribaculaceae	OTU672	19	2	25	1	29	6	6	22	4	12	25	15	9	5	26	28	26	8	5	7	69	150	124	151	71	36	65	65	88	79
d__Bacteria	k__norank_d__Bacteria	p__Firmicutes	c__Clostridia	o__Clostridiales	f__Ruminococcaceae	g__Butyricicoccus	s__uncultured_bacterium_g__Butyricicoccus	OTU957	0	0	0	0	0	2	100	2	4	16	23	20	16	42	12	42	67	79	74	55	4	5	74	55	200	36	158	45	9	29
d__Bacteria	k__norank_d__Bacteria	p__Firmicutes	c__Clostridia	o__Clostridiales	f__Ruminococcaceae	g__Oscillibacter	s__uncultured_bacterium_g__Oscillibacter	OTU451	37	1	10	13	4	37	9	9	4	0	26	67	50	44	39	22	40	89	74	46	11	53	25	84	27	76	93	40	30	86
d__Bacteria	k__norank_d__Bacteria	p__Firmicutes	c__Clostridia	o__Clostridiales	f__Lachnospiraceae	g__norank_f__Lachnospiraceae	s__Lachnospiraceae_bacterium_DW12	OTU826	0	18	0	13	0	40	10	18	6	10	56	15	21	108	21	117	102	31	38	73	50	33	65	30	30	50	30	33	60	54
d__Bacteria	k__norank_d__Bacteria	p__Bacteroidetes	c__Bacteroidia	o__Bacteroidales	f__Muribaculaceae	g__norank_f__Muribaculaceae	s__uncultured_bacterium_g__norank_f__Muribaculaceae	OTU352	0	2	0	0	4	31	18	1	55	4	67	33	4	35	29	75	28	151	12	58	22	67	47	111	85	3	155	21	6	6
d__Bacteria	k__norank_d__Bacteria	p__Bacteroidetes	c__Bacteroidia	o__Bacteroidales	f__Muribaculaceae	g__norank_f__Muribaculaceae	s__unclassified_g__norank_f__Muribaculaceae	OTU142	17	27	11	2	13	2	11	2	19	10	112	84	196	122	54	85	91	94	1	161	1	0	1	0	0	0	0	0	0	0
d__Bacteria	k__norank_d__Bacteria	p__Firmicutes	c__Clostridia	o__Clostridiales	f__Lachnospiraceae	g__unclassified_f__Lachnospiraceae	s__unclassified_f__Lachnospiraceae	OTU964	25	0	33	0	24	5	5	15	1	6	55	35	79	42	18	92	58	19	82	63	55	75	12	1	15	16	17	151	105	9
d__Bacteria	k__norank_d__Bacteria	p__Firmicutes	c__Clostridia	o__Clostridiales	f__Ruminococcaceae	g__Ruminococcaceae_UCG-014	s__unclassified_g__Ruminococcaceae_UCG-014	OTU688	12	12	12	3	14	18	20	6	11	5	34	2	49	36	31	101	36	41	61	158	30	5	136	78	33	14	34	37	30	33
d__Bacteria	k__norank_d__Bacteria	p__Bacteroidetes	c__Bacteroidia	o__Bacteroidales	f__Muribaculaceae	g__norank_f__Muribaculaceae	s__uncultured_bacterium_g__norank_f__Muribaculaceae	OTU556	15	7	13	26	6	5	10	8	5	13	125	170	121	91	72	91	97	68	2	111	8	1	1	6	2	0	1	1	6	0
d__Bacteria	k__norank_d__Bacteria	p__Firmicutes	c__Clostridia	o__Clostridiales	f__Ruminococcaceae	g__unclassified_f__Ruminococcaceae	s__unclassified_f__Ruminococcaceae	OTU184	7	16	2	19	2	19	13	7	13	8	52	120	58	61	68	78	32	43	99	61	10	78	17	56	23	30	6	15	28	35
d__Bacteria	k__norank_d__Bacteria	p__Firmicutes	c__Clostridia	o__Clostridiales	f__Lachnospiraceae	g__Blautia	s__unclassified_g__Blautia	OTU636	0	45	0	7	0	17	25	1	1	3	65	87	89	47	12	12	14	30	7	5	10	46	107	65	150	68	53	60	33	9
d__Bacteria	k__norank_d__Bacteria	p__Bacteroidetes	c__Bacteroidia	o__Bacteroidales	f__Muribaculaceae	g__norank_f__Muribaculaceae	s__uncultured_bacterium_g__norank_f__Muribaculaceae	OTU899	21	15	19	15	10	0	2	6	0	11	21	1	0	5	12	15	7	12	10	12	83	62	105	190	132	113	33	20	82	50
d__Bacteria	k__norank_d__Bacteria	p__Firmicutes	c__Clostridia	o__Clostridiales	f__Ruminococcaceae	g__norank_f__Ruminococcaceae	s__uncultured_bacterium_g__norank_f__Ruminococcaceae	OTU518	13	1	7	3	5	10	18	11	0	30	11	79	73	66	25	18	35	18	55	75	50	48	33	60	56	66	34	61	55	36
d__Bacteria	k__norank_d__Bacteria	p__Firmicutes	c__Clostridia	o__Clostridiales	f__Lachnospiraceae	g__Lachnospiraceae_NK4A136_group	s__uncultured_bacterium_g__Lachnospiraceae_NK4A136_group	OTU866	15	1	16	2	18	19	4	4	11	6	17	78	9	18	21	25	17	18	10	8	60	100	30	20	40	26	118	136	145	36
d__Bacteria	k__norank_d__Bacteria	p__Bacteroidetes	c__Bacteroidia	o__Bacteroidales	f__Muribaculaceae	g__norank_f__Muribaculaceae	s__uncultured_bacterium_g__norank_f__Muribaculaceae	OTU47	25	2	46	4	11	0	0	7	0	0	7	9	8	5	0	8	1	1	0	5	8	111	112	120	121	15	35	30	100	223
d__Bacteria	k__norank_d__Bacteria	p__Bacteroidetes	c__Bacteroidia	o__Bacteroidales	f__Muribaculaceae	g__norank_f__Muribaculaceae	s__unclassified_g__norank_f__Muribaculaceae	OTU341	1	18	3	2	0	14	43	0	6	8	15	5	8	6	12	9	21	4	2	8	78	40	38	18	17	111	143	110	127	112
d__Bacteria	k__norank_d__Bacteria	p__Firmicutes	c__Erysipelotrichia	o__Erysipelotrichales	f__Erysipelotrichaceae	g__Dubosiella	s__uncultured_bacterium_g__Dubosiella	OTU702	0	3	0	0	0	46	13	7	0	25	48	38	39	28	32	31	58	39	103	43	9	24	54	56	42	50	66	54	21	44
d__Bacteria	k__norank_d__Bacteria	p__Firmicutes	c__Clostridia	o__Clostridiales	f__Lachnospiraceae	g__norank_f__Lachnospiraceae	s__unclassified_g__norank_f__Lachnospiraceae	OTU784	7	2	4	2	2	3	10	58	0	5	46	15	82	54	8	44	46	35	102	26	12	56	31	64	19	66	30	65	10	31
d__Bacteria	k__norank_d__Bacteria	p__Firmicutes	c__Clostridia	o__Clostridiales	f__Lachnospiraceae	g__Lachnospiraceae_NK4A136_group	s__Lachnospiraceae_bacterium_COE1	OTU742	13	20	12	29	8	2	2	4	2	0	25	38	18	15	41	20	75	20	12	5	8	287	46	86	51	55	6	10	0	17
d__Bacteria	k__norank_d__Bacteria	p__Firmicutes	c__Clostridia	o__Clostridiales	f__Lachnospiraceae	g__Lachnospiraceae_NK4A136_group	s__uncultured_bacterium_g__Lachnospiraceae_NK4A136_group	OTU921	0	3	0	4	0	20	13	16	31	1	72	5	1	83	107	231	15	81	14	15	1	55	26	11	15	24	9	65	1	4
d__Bacteria	k__norank_d__Bacteria	p__Bacteroidetes	c__Bacteroidia	o__Bacteroidales	f__Muribaculaceae	g__norank_f__Muribaculaceae	s__uncultured_bacterium_g__norank_f__Muribaculaceae	OTU199	2	17	0	5	2	3	32	4	17	5	108	4	7	8	288	189	39	70	15	89	0	0	0	1	0	0	0	1	0	1
d__Bacteria	k__norank_d__Bacteria	p__Firmicutes	c__Clostridia	o__Clostridiales	f__Lachnospiraceae	g__Lachnospiraceae_UCG-001	s__uncultured_bacterium_g__Lachnospiraceae_UCG-001	OTU130	1	43	9	7	1	2	8	10	1	4	4	2	2	27	0	1	4	10	15	4	56	129	108	127	55	45	65	10	8	145
d__Bacteria	k__norank_d__Bacteria	p__Firmicutes	c__Clostridia	o__Clostridiales	f__Lachnospiraceae	g__ASF356	s__uncultured_bacterium_g__ASF356	OTU1100	10	1	10	1	3	21	16	10	10	3	21	52	30	61	13	21	31	42	38	33	16	39	73	28	45	135	101	14	1	15
d__Bacteria	k__norank_d__Bacteria	p__Firmicutes	c__Clostridia	o__Clostridiales	f__Lachnospiraceae	g__unclassified_f__Lachnospiraceae	s__unclassified_f__Lachnospiraceae	OTU943	9	24	5	4	0	3	10	7	18	4	31	39	35	41	48	65	23	45	64	59	83	9	53	49	17	34	17	22	35	13
d__Bacteria	k__norank_d__Bacteria	p__Bacteroidetes	c__Bacteroidia	o__Bacteroidales	f__Muribaculaceae	g__norank_f__Muribaculaceae	s__uncultured_bacterium_g__norank_f__Muribaculaceae	OTU1014	8	4	17	6	4	14	10	9	10	2	92	84	129	86	134	125	21	36	0	73	0	0	0	0	0	0	0	0	0	0
d__Bacteria	k__norank_d__Bacteria	p__Firmicutes	c__Clostridia	o__Clostridiales	f__Lachnospiraceae	g__norank_f__Lachnospiraceae	s__uncultured_bacterium_g__norank_f__Lachnospiraceae	OTU1106	9	21	3	0	4	3	9	6	22	6	42	45	92	52	32	33	98	31	24	23	5	39	20	87	24	60	23	32	9	8
d__Bacteria	k__norank_d__Bacteria	p__Bacteroidetes	c__Bacteroidia	o__Bacteroidales	f__Muribaculaceae	g__unclassified_f__Muribaculaceae	s__unclassified_f__Muribaculaceae	OTU1089	1	17	1	4	0	18	3	1	37	0	15	13	35	34	12	9	25	6	5	10	86	63	22	9	4	93	74	110	54	99
d__Bacteria	k__norank_d__Bacteria	p__Bacteroidetes	c__Bacteroidia	o__Bacteroidales	f__Muribaculaceae	g__norank_f__Muribaculaceae	s__uncultured_bacterium_g__norank_f__Muribaculaceae	OTU443	0	24	0	3	0	1	36	3	2	10	98	132	85	80	51	81	88	42	5	100	1	0	1	0	0	0	0	0	0	0
d__Bacteria	k__norank_d__Bacteria	p__Bacteroidetes	c__Bacteroidia	o__Bacteroidales	f__Muribaculaceae	g__norank_f__Muribaculaceae	s__uncultured_bacterium_g__norank_f__Muribaculaceae	OTU569	5	8	0	32	2	15	3	2	8	4	12	6	5	0	6	8	2	6	7	8	3	9	211	129	126	0	3	11	183	0
d__Bacteria	k__norank_d__Bacteria	p__Bacteroidetes	c__Bacteroidia	o__Bacteroidales	f__Muribaculaceae	g__norank_f__Muribaculaceae	s__uncultured_bacterium_g__norank_f__Muribaculaceae	OTU907	4	3	20	1	16	7	6	10	7	5	14	0	0	0	33	14	2	7	4	2	68	159	116	38	44	5	139	30	57	1
d__Bacteria	k__norank_d__Bacteria	p__Bacteroidetes	c__Bacteroidia	o__Bacteroidales	f__Muribaculaceae	g__norank_f__Muribaculaceae	s__uncultured_bacterium_g__norank_f__Muribaculaceae	OTU546	8	3	6	12	9	8	3	13	6	5	102	15	61	45	62	72	55	101	59	64	0	20	13	12	8	2	29	2	4	2
d__Bacteria	k__norank_d__Bacteria	p__Firmicutes	c__Clostridia	o__Clostridiales	f__Ruminococcaceae	g__Ruminiclostridium_9	s__uncultured_bacterium_g__Ruminiclostridium_9	OTU1077	15	2	29	0	12	4	1	3	0	3	31	56	28	21	33	41	25	88	52	51	20	33	35	37	28	19	75	17	30	8
d__Bacteria	k__norank_d__Bacteria	p__Firmicutes	c__Clostridia	o__Clostridiales	f__Lachnospiraceae	g__Lachnospiraceae_NK4A136_group	s__unclassified_g__Lachnospiraceae_NK4A136_group	OTU875	6	8	9	13	5	4	3	7	13	0	1	21	9	15	22	15	36	6	13	21	16	89	17	19	23	155	34	14	1	180
d__Bacteria	k__norank_d__Bacteria	p__Bacteroidetes	c__Bacteroidia	o__Bacteroidales	f__Muribaculaceae	g__norank_f__Muribaculaceae	s__uncultured_bacterium_g__norank_f__Muribaculaceae	OTU753	20	7	14	6	12	0	0	4	0	5	6	9	0	3	0	7	1	0	0	2	3	1	112	367	88	1	4	5	91	0
d__Bacteria	k__norank_d__Bacteria	p__Firmicutes	c__Clostridia	o__Clostridiales	f__Lachnospiraceae	g__norank_f__Lachnospiraceae	s__uncultured_bacterium_g__norank_f__Lachnospiraceae	OTU127	10	2	40	0	12	0	1	0	3	0	10	32	32	17	21	6	17	20	6	8	22	64	8	14	26	119	73	51	14	130
d__Bacteria	k__norank_d__Bacteria	p__Bacteroidetes	c__Bacteroidia	o__Bacteroidales	f__Muribaculaceae	g__norank_f__Muribaculaceae	s__uncultured_bacterium_g__norank_f__Muribaculaceae	OTU890	0	12	1	2	0	19	13	0	19	1	19	0	0	0	18	11	4	3	0	11	34	22	111	224	134	1	13	20	60	0
d__Bacteria	k__norank_d__Bacteria	p__Firmicutes	c__Clostridia	o__Clostridiales	f__Lachnospiraceae	g__norank_f__Lachnospiraceae	s__unclassified_g__norank_f__Lachnospiraceae	OTU500	8	10	13	5	3	0	2	11	0	14	31	14	11	42	14	59	26	15	33	28	23	51	51	75	114	30	36	7	4	18
d__Bacteria	k__norank_d__Bacteria	p__Bacteroidetes	c__Bacteroidia	o__Bacteroidales	f__Muribaculaceae	g__norank_f__Muribaculaceae	s__uncultured_bacterium_g__norank_f__Muribaculaceae	OTU570	7	1	9	1	23	3	11	7	1	2	12	25	36	19	4	5	6	6	0	23	35	169	163	31	62	1	1	15	66	0
d__Bacteria	k__norank_d__Bacteria	p__Firmicutes	c__Clostridia	o__Clostridiales	f__Lachnospiraceae	g__unclassified_f__Lachnospiraceae	s__unclassified_f__Lachnospiraceae	OTU92	18	7	2	19	12	5	0	1	0	0	25	102	52	32	53	51	24	25	21	39	1	0	0	0	0	162	0	78	0	7
d__Bacteria	k__norank_d__Bacteria	p__Bacteroidetes	c__Bacteroidia	o__Bacteroidales	f__Muribaculaceae	g__norank_f__Muribaculaceae	s__uncultured_bacterium_g__norank_f__Muribaculaceae	OTU66	5	5	7	7	14	1	8	2	7	5	5	0	0	0	0	6	0	1	0	1	25	45	101	145	78	45	50	44	61	65
d__Bacteria	k__norank_d__Bacteria	p__Bacteroidetes	c__Bacteroidia	o__Bacteroidales	f__Muribaculaceae	g__norank_f__Muribaculaceae	s__uncultured_bacterium_g__norank_f__Muribaculaceae	OTU416	7	0	28	0	22	0	0	0	0	0	4	1	0	0	1	0	1	1	2	1	66	0	1	1	3	95	0	121	4	369
d__Bacteria	k__norank_d__Bacteria	p__Firmicutes	c__Clostridia	o__Clostridiales	f__Ruminococcaceae	g__Ruminiclostridium_6	s__uncultured_bacterium_g__Ruminiclostridium_6	OTU717	3	14	7	4	0	13	5	6	1	2	2	2	0	1	0	6	4	0	4	1	2	3	0	286	2	186	5	118	2	44
d__Bacteria	k__norank_d__Bacteria	p__Bacteroidetes	c__Bacteroidia	o__Bacteroidales	f__Rikenellaceae	g__Rikenellaceae_RC9_gut_group	s__unclassified_g__Rikenellaceae_RC9_gut_group	OTU680	8	22	2	5	0	15	0	0	3	0	0	0	0	0	3	0	0	0	0	0	37	86	33	60	52	126	90	52	28	80
d__Bacteria	k__norank_d__Bacteria	p__Firmicutes	c__Clostridia	o__Clostridiales	f__Ruminococcaceae	g__Anaerotruncus	s__uncultured_bacterium_g__Anaerotruncus	OTU665	20	0	6	5	11	1	7	2	2	0	5	21	14	19	28	26	11	14	35	7	4	67	197	73	5	17	40	14	3	40
d__Bacteria	k__norank_d__Bacteria	p__Bacteroidetes	c__Bacteroidia	o__Bacteroidales	f__unclassified_o__Bacteroidales	g__unclassified_o__Bacteroidales	s__unclassified_o__Bacteroidales	OTU94	3	1	5	2	1	2	15	22	0	2	10	35	28	15	0	0	15	4	0	6	51	11	85	19	31	145	12	48	67	58
d__Bacteria	k__norank_d__Bacteria	p__Firmicutes	c__Clostridia	o__Clostridiales	f__Lachnospiraceae	g__unclassified_f__Lachnospiraceae	s__unclassified_f__Lachnospiraceae	OTU2	9	4	1	3	11	0	14	10	0	1	13	0	36	31	33	3	83	88	9	50	4	0	0	0	0	168	0	38	14	64
d__Bacteria	k__norank_d__Bacteria	p__Bacteroidetes	c__Bacteroidia	o__Bacteroidales	f__Muribaculaceae	g__norank_f__Muribaculaceae	s__uncultured_bacterium_g__norank_f__Muribaculaceae	OTU575	2	2	14	0	16	0	1	17	0	0	1	1	4	0	0	0	0	0	0	0	47	0	0	0	0	137	1	99	7	334
d__Bacteria	k__norank_d__Bacteria	p__Bacteroidetes	c__Bacteroidia	o__Bacteroidales	f__Muribaculaceae	g__norank_f__Muribaculaceae	s__uncultured_bacterium_g__norank_f__Muribaculaceae	OTU79	1	11	0	17	0	7	1	3	8	3	8	8	1	1	0	4	1	0	0	1	3	8	210	115	111	0	9	4	131	0
d__Bacteria	k__norank_d__Bacteria	p__Firmicutes	c__Clostridia	o__Clostridiales	f__Lachnospiraceae	g__norank_f__Lachnospiraceae	s__unclassified_g__norank_f__Lachnospiraceae	OTU126	13	22	1	0	4	3	1	2	0	2	10	24	5	25	13	24	21	8	4	27	25	91	45	50	46	51	45	35	25	30
d__Bacteria	k__norank_d__Bacteria	p__Firmicutes	c__Clostridia	o__Clostridiales	f__Lachnospiraceae	g__Blautia	s__Blautia_coccoides_g__Blautia	OTU452	5	3	7	1	15	2	2	5	4	4	15	18	21	26	13	18	20	21	21	17	15	66	30	55	60	30	24	51	39	32
d__Bacteria	k__norank_d__Bacteria	p__Firmicutes	c__Clostridia	o__Clostridiales	f__Lachnospiraceae	g__unclassified_f__Lachnospiraceae	s__unclassified_f__Lachnospiraceae	OTU646	8	6	3	7	3	4	3	6	4	3	5	6	6	24	3	1	36	45	18	25	6	68	0	3	6	43	228	13	0	54
d__Bacteria	k__norank_d__Bacteria	p__Firmicutes	c__Clostridia	o__Clostridiales	f__Lachnospiraceae	g__Roseburia	s__uncultured_bacterium_g__Roseburia	OTU831	7	3	3	2	2	1	3	3	17	5	21	108	25	5	1	2	3	0	3	0	5	345	2	16	2	3	33	3	1	10
d__Bacteria	k__norank_d__Bacteria	p__Firmicutes	c__Clostridia	o__Clostridiales	f__Lachnospiraceae	g__Lachnoclostridium	s__unclassified_g__Lachnoclostridium	OTU349	5	1	15	1	6	2	4	4	5	0	28	27	28	28	31	35	25	18	5	21	33	26	25	15	19	77	69	58	8	11
d__Bacteria	k__norank_d__Bacteria	p__Bacteroidetes	c__Bacteroidia	o__Bacteroidales	f__unclassified_o__Bacteroidales	g__unclassified_o__Bacteroidales	s__unclassified_o__Bacteroidales	OTU933	3	2	3	8	2	1	1	0	23	0	17	10	24	15	32	9	20	23	0	13	117	31	19	1	1	93	58	54	16	30
d__Bacteria	k__norank_d__Bacteria	p__Firmicutes	c__Clostridia	o__Clostridiales	f__Lachnospiraceae	g__Blautia	s__unclassified_g__Blautia	OTU741	2	4	2	6	0	7	7	4	2	8	11	12	32	21	106	31	23	5	1	1	18	48	33	18	19	68	28	45	11	52
d__Bacteria	k__norank_d__Bacteria	p__Firmicutes	c__Clostridia	o__Clostridiales	f__Ruminococcaceae	g__Intestinimonas	s__uncultured_bacterium_g__Intestinimonas	OTU919	11	4	9	2	3	4	2	2	3	0	15	27	33	29	18	9	14	29	28	29	1	58	16	46	15	53	40	51	27	31
d__Bacteria	k__norank_d__Bacteria	p__Firmicutes	c__Bacilli	o__Lactobacillales	f__Lactobacillaceae	g__Lactobacillus	s__unclassified_g__Lactobacillus	OTU137	19	4	1	0	6	0	0	7	0	3	56	99	12	4	10	95	78	23	7	3	22	18	12	11	15	19	28	45	1	6
d__Bacteria	k__norank_d__Bacteria	p__Firmicutes	c__Clostridia	o__Clostridiales	f__Lachnospiraceae	g__Lachnospiraceae_NK4A136_group	s__unclassified_g__Lachnospiraceae_NK4A136_group	OTU423	2	6	0	0	17	9	1	0	5	0	1	98	13	17	5	13	23	2	0	11	17	40	42	48	35	60	49	15	20	53
d__Bacteria	k__norank_d__Bacteria	p__Firmicutes	c__Clostridia	o__Clostridiales	f__Lachnospiraceae	g__Lachnospiraceae_NK4A136_group	s__uncultured_bacterium_g__Lachnospiraceae_NK4A136_group	OTU45	0	7	3	0	0	13	7	2	3	4	3	62	0	1	33	28	16	1	1	0	1	140	69	75	16	75	26	2	1	10
d__Bacteria	k__norank_d__Bacteria	p__Bacteroidetes	c__Bacteroidia	o__Bacteroidales	f__Muribaculaceae	g__norank_f__Muribaculaceae	s__uncultured_bacterium_g__norank_f__Muribaculaceae	OTU591	0	5	0	2	0	16	5	0	1	8	28	55	163	72	35	28	119	19	0	35	0	0	0	0	0	0	0	0	0	0
d__Bacteria	k__norank_d__Bacteria	p__Bacteroidetes	c__Bacteroidia	o__Bacteroidales	f__Muribaculaceae	g__norank_f__Muribaculaceae	s__unclassified_g__norank_f__Muribaculaceae	OTU893	17	5	0	5	2	2	0	4	0	0	0	0	0	0	1	0	1	0	0	0	60	28	52	65	55	52	28	108	44	56
d__Bacteria	k__norank_d__Bacteria	p__Firmicutes	c__Clostridia	o__Clostridiales	f__Ruminococcaceae	g__Ruminiclostridium_6	s__uncultured_bacterium_g__Ruminiclostridium_6	OTU135	3	2	10	4	0	1	3	2	4	4	0	119	0	3	0	2	6	5	24	8	8	35	0	6	0	196	6	60	1	68
d__Bacteria	k__norank_d__Bacteria	p__Bacteroidetes	c__Bacteroidia	o__Bacteroidales	f__Rikenellaceae	g__Rikenellaceae_RC9_gut_group	s__uncultured_bacterium_g__Rikenellaceae_RC9_gut_group	OTU222	2	1	0	0	1	13	7	0	9	0	27	68	19	13	30	38	32	86	123	46	8	6	6	8	10	4	5	5	6	6
d__Bacteria	k__norank_d__Bacteria	p__Firmicutes	c__Clostridia	o__Clostridiales	f__Ruminococcaceae	g__Ruminiclostridium_5	s__uncultured_bacterium_g__Ruminiclostridium_5	OTU700	2	6	3	3	1	3	4	1	7	3	24	10	27	28	30	20	35	72	22	26	18	33	21	21	6	97	21	3	7	20
d__Bacteria	k__norank_d__Bacteria	p__Bacteroidetes	c__Bacteroidia	o__Bacteroidales	f__Muribaculaceae	g__norank_f__Muribaculaceae	s__uncultured_Bacteroidales_bacterium_g__norank_f__Muribaculaceae	OTU764	0	0	0	0	0	19	5	1	8	0	11	15	14	5	8	9	9	3	0	17	45	8	49	88	79	39	25	45	54	18
d__Bacteria	k__norank_d__Bacteria	p__Bacteroidetes	c__Bacteroidia	o__Bacteroidales	f__Muribaculaceae	g__norank_f__Muribaculaceae	s__uncultured_bacterium_g__norank_f__Muribaculaceae	OTU774	0	0	0	0	0	0	20	5	0	7	8	3	4	0	2	16	2	1	0	1	9	9	103	102	33	8	68	24	145	2
d__Bacteria	k__norank_d__Bacteria	p__Bacteroidetes	c__Bacteroidia	o__Bacteroidales	f__Muribaculaceae	g__norank_f__Muribaculaceae	s__uncultured_bacterium_g__norank_f__Muribaculaceae	OTU949	4	6	9	2	2	2	1	4	0	2	26	6	28	18	31	15	21	9	1	11	46	82	49	58	32	10	55	1	25	3
d__Bacteria	k__norank_d__Bacteria	p__Firmicutes	c__Clostridia	o__Clostridiales	f__Ruminococcaceae	g__Ruminococcaceae_UCG-014	s__unclassified_g__Ruminococcaceae_UCG-014	OTU1001	0	2	0	23	0	0	0	0	5	1	13	0	14	13	4	67	11	6	14	14	20	10	8	9	11	38	65	89	65	55
d__Bacteria	k__norank_d__Bacteria	p__Firmicutes	c__Clostridia	o__Clostridiales	f__Clostridiales_vadinBB60_group	g__norank_f__Clostridiales_vadinBB60_group	s__unclassified_g__norank_f__Clostridiales_vadinBB60_group	OTU968	6	4	7	1	2	6	0	2	1	1	11	23	21	63	21	24	26	39	85	11	5	8	25	18	26	19	32	18	15	36
d__Bacteria	k__norank_d__Bacteria	p__Firmicutes	c__Clostridia	o__Clostridiales	f__Lachnospiraceae	g__unclassified_f__Lachnospiraceae	s__unclassified_f__Lachnospiraceae	OTU277	12	0	13	0	5	0	0	0	0	0	15	18	32	26	12	30	18	32	35	45	50	0	0	0	0	0	0	90	93	18
d__Bacteria	k__norank_d__Bacteria	p__Firmicutes	c__Clostridia	o__Clostridiales	f__Lachnospiraceae	g__unclassified_f__Lachnospiraceae	s__unclassified_f__Lachnospiraceae	OTU19	1	2	4	4	7	0	7	2	0	1	28	6	38	43	101	38	15	11	36	12	54	5	14	5	9	12	14	24	48	1
d__Bacteria	k__norank_d__Bacteria	p__Firmicutes	c__Clostridia	o__Clostridiales	f__Lachnospiraceae	g__Lachnospiraceae_FCS020_group	s__uncultured_bacterium_g__Lachnospiraceae_FCS020_group	OTU944	0	0	0	0	0	19	0	2	6	1	13	28	25	30	6	13	13	9	23	22	18	25	52	29	25	31	51	39	18	39
d__Bacteria	k__norank_d__Bacteria	p__Firmicutes	c__Clostridia	o__Clostridiales	f__Lachnospiraceae	g__norank_f__Lachnospiraceae	s__unclassified_g__norank_f__Lachnospiraceae	OTU653	1	1	1	7	0	6	3	1	2	5	16	21	13	32	10	45	21	7	14	25	42	56	39	32	26	18	28	29	28	5
d__Bacteria	k__norank_d__Bacteria	p__Firmicutes	c__Clostridia	o__Clostridiales	f__Ruminococcaceae	g__Ruminococcaceae_UCG-014	s__unclassified_g__Ruminococcaceae_UCG-014	OTU69	6	7	2	3	0	3	1	0	3	1	26	3	22	13	11	46	20	33	28	19	30	15	25	10	8	7	65	55	35	35
d__Bacteria	k__norank_d__Bacteria	p__Bacteroidetes	c__Bacteroidia	o__Bacteroidales	f__Muribaculaceae	g__norank_f__Muribaculaceae	s__uncultured_bacterium_g__norank_f__Muribaculaceae	OTU274	0	0	0	0	0	17	9	0	0	0	31	71	146	87	4	22	45	23	1	65	1	1	0	1	0	0	0	2	0	0
d__Bacteria	k__norank_d__Bacteria	p__Bacteroidetes	c__Bacteroidia	o__Bacteroidales	f__Muribaculaceae	g__norank_f__Muribaculaceae	s__uncultured_bacterium_g__norank_f__Muribaculaceae	OTU757	4	6	0	10	0	2	1	0	3	0	53	52	93	53	19	83	72	26	0	45	1	0	0	1	0	1	0	0	0	1
d__Bacteria	k__norank_d__Bacteria	p__Bacteroidetes	c__Bacteroidia	o__Bacteroidales	f__Muribaculaceae	g__norank_f__Muribaculaceae	s__unclassified_g__norank_f__Muribaculaceae	OTU401	1	4	1	10	0	2	1	4	1	0	8	15	35	13	2	7	10	2	0	23	22	56	54	48	93	3	18	35	49	4
d__Bacteria	k__norank_d__Bacteria	p__Bacteroidetes	c__Bacteroidia	o__Bacteroidales	f__Muribaculaceae	g__norank_f__Muribaculaceae	s__uncultured_bacterium_g__norank_f__Muribaculaceae	OTU735	13	0	4	0	5	1	0	0	0	1	106	1	0	4	156	65	36	59	1	62	1	0	0	1	0	0	1	0	0	0
d__Bacteria	k__norank_d__Bacteria	p__Bacteroidetes	c__Bacteroidia	o__Bacteroidales	f__unclassified_o__Bacteroidales	g__unclassified_o__Bacteroidales	s__unclassified_o__Bacteroidales	OTU1080	6	0	9	0	4	0	0	3	0	0	4	46	28	37	11	5	23	9	0	4	21	18	21	15	19	18	54	48	50	59
d__Bacteria	k__norank_d__Bacteria	p__Firmicutes	c__Clostridia	o__Clostridiales	f__Lachnospiraceae	g__unclassified_f__Lachnospiraceae	s__unclassified_f__Lachnospiraceae	OTU22	5	0	7	4	0	1	0	4	0	1	8	10	8	4	8	11	14	7	15	1	15	28	112	58	46	46	38	18	25	12
d__Bacteria	k__norank_d__Bacteria	p__Bacteroidetes	c__Bacteroidia	o__Bacteroidales	f__Muribaculaceae	g__norank_f__Muribaculaceae	s__unclassified_g__norank_f__Muribaculaceae	OTU271	0	11	2	1	0	8	0	0	0	0	13	21	37	21	8	12	22	19	3	26	15	66	45	35	55	1	8	9	56	5
d__Bacteria	k__norank_d__Bacteria	p__Firmicutes	c__Clostridia	o__Clostridiales	f__Lachnospiraceae	g__norank_f__Lachnospiraceae	s__uncultured_bacterium_g__norank_f__Lachnospiraceae	OTU109	1	2	0	1	1	5	2	1	7	2	5	1	75	30	2	4	8	15	33	10	12	35	32	15	30	36	51	35	29	18
d__Bacteria	k__norank_d__Bacteria	p__Firmicutes	c__Clostridia	o__Clostridiales	f__Lachnospiraceae	g__norank_f__Lachnospiraceae	s__Clostridium_sp._Culture-27	OTU917	1	9	5	0	1	0	2	4	0	0	8	8	9	15	14	21	25	10	11	25	25	20	16	52	62	25	27	17	21	54
d__Bacteria	k__norank_d__Bacteria	p__Firmicutes	c__Clostridia	o__Clostridiales	f__Lachnospiraceae	g__norank_f__Lachnospiraceae	s__uncultured_bacterium_g__norank_f__Lachnospiraceae	OTU613	0	2	0	9	7	0	2	1	0	0	8	46	5	10	6	1	35	30	11	2	14	101	24	28	15	15	21	26	35	30
d__Bacteria	k__norank_d__Bacteria	p__Firmicutes	c__Clostridia	o__Clostridiales	f__Lachnospiraceae	g__unclassified_f__Lachnospiraceae	s__unclassified_f__Lachnospiraceae	OTU857	0	4	0	0	0	0	1	6	0	10	33	32	18	11	21	41	32	28	20	35	19	25	18	17	15	18	28	18	14	18
d__Bacteria	k__norank_d__Bacteria	p__Firmicutes	c__Clostridia	o__Clostridiales	f__Ruminococcaceae	g__unclassified_f__Ruminococcaceae	s__unclassified_f__Ruminococcaceae	OTU655	2	2	1	3	0	1	0	4	2	6	15	32	35	29	14	9	23	10	12	35	28	18	25	23	18	36	26	18	23	25
d__Bacteria	k__norank_d__Bacteria	p__Firmicutes	c__Clostridia	o__Clostridiales	f__Ruminococcaceae	g__Oscillibacter	s__uncultured_bacterium_g__Oscillibacter	OTU493	1	1	4	1	2	0	1	6	0	5	9	21	19	18	20	13	18	18	28	19	12	15	25	48	41	36	18	19	36	21
d__Bacteria	k__norank_d__Bacteria	p__Bacteroidetes	c__Bacteroidia	o__Bacteroidales	f__Muribaculaceae	g__norank_f__Muribaculaceae	s__uncultured_bacterium_g__norank_f__Muribaculaceae	OTU863	2	2	0	2	0	0	0	0	0	15	59	2	62	100	6	15	63	53	0	79	1	0	3	0	1	5	1	0	3	0
d__Bacteria	k__norank_d__Bacteria	p__Firmicutes	c__Clostridia	o__Clostridiales	f__Lachnospiraceae	g__norank_f__Lachnospiraceae	s__unclassified_g__norank_f__Lachnospiraceae	OTU664	10	0	4	0	3	0	0	3	0	0	5	13	14	17	43	14	7	33	10	9	25	28	36	39	38	28	52	12	8	19
d__Bacteria	k__norank_d__Bacteria	p__Bacteroidetes	c__Bacteroidia	o__Bacteroidales	f__Muribaculaceae	g__norank_f__Muribaculaceae	s__uncultured_bacterium_g__norank_f__Muribaculaceae	OTU897	4	0	0	0	5	1	3	0	7	0	10	0	0	0	9	5	0	1	0	8	41	31	56	51	62	54	28	14	56	21
d__Bacteria	k__norank_d__Bacteria	p__Bacteroidetes	c__Bacteroidia	o__Bacteroidales	f__Muribaculaceae	g__norank_f__Muribaculaceae	s__uncultured_bacterium_g__norank_f__Muribaculaceae	OTU930	0	1	0	6	2	1	7	2	1	0	5	1	5	5	4	1	3	3	2	0	36	38	84	28	29	56	51	22	31	36
d__Bacteria	k__norank_d__Bacteria	p__Firmicutes	c__Clostridia	o__Clostridiales	f__Lachnospiraceae	g__norank_f__Lachnospiraceae	s__uncultured_bacterium_g__norank_f__Lachnospiraceae	OTU90	0	0	0	2	0	1	7	1	7	2	7	2	73	34	2	5	15	13	35	12	32	21	8	7	10	41	38	35	25	18
d__Bacteria	k__norank_d__Bacteria	p__Firmicutes	c__Clostridia	o__Clostridiales	f__Lachnospiraceae	g__unclassified_f__Lachnospiraceae	s__unclassified_f__Lachnospiraceae	OTU991	3	2	1	1	1	0	2	1	6	3	15	37	23	33	25	17	34	31	23	27	25	16	18	18	4	25	15	18	16	12
d__Bacteria	k__norank_d__Bacteria	p__Firmicutes	c__Clostridia	o__Clostridiales	f__Ruminococcaceae	g__unclassified_f__Ruminococcaceae	s__unclassified_f__Ruminococcaceae	OTU112	0	1	0	0	0	18	1	0	0	0	21	13	10	21	18	29	29	27	25	13	6	15	12	19	25	39	12	46	25	19
d__Bacteria	k__norank_d__Bacteria	p__Firmicutes	c__Clostridia	o__Clostridiales	f__unclassified_o__Clostridiales	g__unclassified_o__Clostridiales	s__unclassified_o__Clostridiales	OTU407	0	0	0	0	0	0	0	0	0	19	13	14	25	29	7	12	18	21	7	8	15	18	19	22	18	25	28	45	48	31
d__Bacteria	k__norank_d__Bacteria	p__Firmicutes	c__Clostridia	o__Clostridiales	f__Lachnospiraceae	g__Roseburia	s__uncultured_bacterium_g__Roseburia	OTU630	1	1	4	9	0	3	0	0	0	1	56	54	18	54	36	39	28	7	29	35	2	1	3	5	1	2	2	15	22	12
d__Bacteria	k__norank_d__Bacteria	p__Firmicutes	c__Clostridia	o__Clostridiales	f__Lachnospiraceae	g__A2	s__uncultured_bacterium_g__A2	OTU692	1	4	0	4	0	2	3	2	0	3	9	1	54	20	5	8	8	18	31	33	8	9	12	21	19	51	31	6	8	66
d__Bacteria	k__norank_d__Bacteria	p__Bacteroidetes	c__Bacteroidia	o__Bacteroidales	f__Muribaculaceae	g__norank_f__Muribaculaceae	s__uncultured_Bacteroidales_bacterium_g__norank_f__Muribaculaceae	OTU614	4	2	2	2	3	1	1	1	3	0	7	7	13	18	14	8	15	10	0	6	22	19	18	10	25	65	30	51	24	52
d__Bacteria	k__norank_d__Bacteria	p__Bacteroidetes	c__Bacteroidia	o__Bacteroidales	f__Muribaculaceae	g__norank_f__Muribaculaceae	s__unclassified_g__norank_f__Muribaculaceae	OTU410	0	1	0	0	0	15	1	0	0	1	13	20	30	21	25	19	34	8	5	11	18	16	17	15	12	21	19	28	36	42
d__Bacteria	k__norank_d__Bacteria	p__Firmicutes	c__Clostridia	o__Clostridiales	f__Lachnospiraceae	g__unclassified_f__Lachnospiraceae	s__unclassified_f__Lachnospiraceae	OTU1	0	2	1	6	0	0	3	6	0	0	12	29	7	17	25	11	5	13	3	6	22	29	94	22	22	24	46	9	14	0
d__Bacteria	k__norank_d__Bacteria	p__Bacteroidetes	c__Bacteroidia	o__Bacteroidales	f__Muribaculaceae	g__norank_f__Muribaculaceae	s__uncultured_bacterium_g__norank_f__Muribaculaceae	OTU170	0	0	8	1	0	0	0	4	0	4	26	71	43	31	29	16	17	8	5	12	8	7	12	25	32	8	7	12	14	25
d__Bacteria	k__norank_d__Bacteria	p__Firmicutes	c__Clostridia	o__Clostridiales	f__Lachnospiraceae	g__norank_f__Lachnospiraceae	s__unclassified_g__norank_f__Lachnospiraceae	OTU652	4	1	4	4	1	0	0	2	0	1	15	38	32	21	30	8	35	15	8	15	8	52	1	6	15	15	19	10	29	25
d__Bacteria	k__norank_d__Bacteria	p__Firmicutes	c__Clostridia	o__Clostridiales	f__Ruminococcaceae	g__Ruminococcaceae_UCG-014	s__unclassified_g__Ruminococcaceae_UCG-014	OTU854	15	2	0	0	0	0	0	0	0	0	8	18	15	10	11	17	8	10	32	21	24	22	25	29	32	35	32	19	18	9
d__Bacteria	k__norank_d__Bacteria	p__Firmicutes	c__Clostridia	o__Clostridiales	f__Lachnospiraceae	g__unclassified_f__Lachnospiraceae	s__unclassified_f__Lachnospiraceae	OTU99	9	2	1	2	1	0	0	2	0	0	25	12	0	6	19	21	8	2	0	1	25	59	68	18	24	18	35	19	18	16
d__Bacteria	k__norank_d__Bacteria	p__Firmicutes	c__Clostridia	o__Clostridiales	f__Ruminococcaceae	g__Harryflintia	s__uncultured_bacterium_g__Harryflintia	OTU1086	4	1	2	6	0	2	0	0	1	1	12	34	17	28	33	25	24	62	30	35	2	6	7	12	10	25	5	8	8	8
d__Bacteria	k__norank_d__Bacteria	p__Firmicutes	c__Clostridia	o__Clostridiales	f__Lachnospiraceae	g__unclassified_f__Lachnospiraceae	s__unclassified_f__Lachnospiraceae	OTU365	3	0	0	5	0	0	1	8	0	0	1	6	2	8	3	7	4	1	1	6	48	39	32	38	28	26	38	39	28	36
d__Bacteria	k__norank_d__Bacteria	p__Bacteroidetes	c__Bacteroidia	o__Bacteroidales	f__Muribaculaceae	g__norank_f__Muribaculaceae	s__uncultured_bacterium_g__norank_f__Muribaculaceae	OTU765	0	0	0	0	0	0	10	1	0	6	32	107	75	52	2	24	36	19	0	40	0	0	0	0	1	0	0	1	1	0
d__Bacteria	k__norank_d__Bacteria	p__Firmicutes	c__Clostridia	o__Clostridiales	f__Lachnospiraceae	g__unclassified_f__Lachnospiraceae	s__unclassified_f__Lachnospiraceae	OTU993	3	4	6	0	0	0	0	2	1	0	8	12	20	14	12	8	3	17	12	9	14	48	38	25	48	39	25	18	5	15
d__Bacteria	k__norank_d__Bacteria	p__Bacteroidetes	c__Bacteroidia	o__Bacteroidales	f__Muribaculaceae	g__norank_f__Muribaculaceae	s__uncultured_Bacteroidales_bacterium_g__norank_f__Muribaculaceae	OTU588	1	8	0	1	4	0	0	1	0	1	24	15	26	11	22	18	17	19	21	21	16	28	29	8	21	18	19	18	15	24
d__Bacteria	k__norank_d__Bacteria	p__Bacteroidetes	c__Bacteroidia	o__Bacteroidales	f__Muribaculaceae	g__norank_f__Muribaculaceae	s__unclassified_g__norank_f__Muribaculaceae	OTU1034	5	2	0	3	1	1	0	2	1	0	54	3	8	6	170	53	20	24	1	36	1	2	4	0	2	1	1	0	1	2
d__Bacteria	k__norank_d__Bacteria	p__Bacteroidetes	c__Bacteroidia	o__Bacteroidales	f__Muribaculaceae	g__norank_f__Muribaculaceae	s__uncultured_bacterium_g__norank_f__Muribaculaceae	OTU49	1	0	5	0	6	0	0	2	0	1	7	0	0	0	6	8	2	5	7	9	28	19	14	121	65	15	8	26	33	15
d__Bacteria	k__norank_d__Bacteria	p__Firmicutes	c__Clostridia	o__Clostridiales	f__Ruminococcaceae	g__[Eubacterium]_coprostanoligenes_group	s__gut_metagenome_g__[Eubacterium]_coprostanoligenes_group	OTU462	0	0	0	0	0	0	6	3	0	5	15	25	15	13	2	11	25	9	55	38	15	18	36	29	18	16	18	12	8	9
d__Bacteria	k__norank_d__Bacteria	p__Firmicutes	c__Clostridia	o__Clostridiales	f__Lachnospiraceae	g__unclassified_f__Lachnospiraceae	s__unclassified_f__Lachnospiraceae	OTU686	5	1	2	1	0	2	1	0	0	2	15	45	16	28	11	7	18	25	35	20	8	12	8	8	15	15	25	28	11	35
d__Bacteria	k__norank_d__Bacteria	p__Bacteroidetes	c__Bacteroidia	o__Bacteroidales	f__Muribaculaceae	g__norank_f__Muribaculaceae	s__uncultured_bacterium_g__norank_f__Muribaculaceae	OTU1066	0	1	0	7	0	2	1	2	1	0	26	49	68	69	33	35	65	12	7	18	0	0	0	0	0	0	0	0	1	0
d__Bacteria	k__norank_d__Bacteria	p__Bacteroidetes	c__Bacteroidia	o__Bacteroidales	f__Muribaculaceae	g__norank_f__Muribaculaceae	s__uncultured_bacterium_g__norank_f__Muribaculaceae	OTU813	1	1	10	0	0	0	0	0	0	1	56	15	45	69	21	18	55	32	2	50	1	0	1	4	8	0	4	0	1	0
d__Bacteria	k__norank_d__Bacteria	p__Firmicutes	c__Clostridia	o__Clostridiales	f__Lachnospiraceae	g__norank_f__Lachnospiraceae	s__uncultured_bacterium_g__norank_f__Lachnospiraceae	OTU203	1	0	4	0	4	1	2	1	0	0	39	36	14	28	7	37	5	21	2	35	25	23	5	22	24	14	7	14	15	5
d__Bacteria	k__norank_d__Bacteria	p__Firmicutes	c__Clostridia	o__Clostridiales	f__Lachnospiraceae	g__Tyzzerella_3	s__unclassified_g__Tyzzerella_3	OTU295	2	0	0	5	0	5	0	0	0	1	8	0	8	8	17	9	5	12	7	15	28	44	15	51	9	65	19	32	12	10
d__Bacteria	k__norank_d__Bacteria	p__Bacteroidetes	c__Bacteroidia	o__Bacteroidales	f__Muribaculaceae	g__norank_f__Muribaculaceae	s__uncultured_bacterium_g__norank_f__Muribaculaceae	OTU1023	0	0	0	0	0	0	0	0	0	13	34	36	49	50	13	31	68	28	18	46	0	0	0	0	0	0	1	0	0	0
d__Bacteria	k__norank_d__Bacteria	p__Bacteroidetes	c__Bacteroidia	o__Bacteroidales	f__Rikenellaceae	g__Alistipes	s__unclassified_g__Alistipes	OTU994	0	1	0	0	0	2	4	3	3	0	16	8	11	15	17	19	22	23	30	52	5	8	12	46	49	2	6	8	16	8
d__Bacteria	k__norank_d__Bacteria	p__Bacteroidetes	c__Bacteroidia	o__Bacteroidales	f__Muribaculaceae	g__norank_f__Muribaculaceae	s__uncultured_bacterium_g__norank_f__Muribaculaceae	OTU1052	0	2	0	0	0	8	2	0	1	0	54	36	36	59	14	15	56	36	26	36	1	0	1	0	0	0	1	0	0	1
d__Bacteria	k__norank_d__Bacteria	p__Bacteroidetes	c__Bacteroidia	o__Bacteroidales	f__Bacteroidaceae	g__Bacteroides	s__Bacteroides_thetaiotaomicron	OTU333	0	3	2	2	0	0	3	2	0	0	14	25	27	18	15	10	17	12	22	16	28	16	19	17	15	28	10	20	25	17
d__Bacteria	k__norank_d__Bacteria	p__Bacteroidetes	c__Bacteroidia	o__Bacteroidales	f__Muribaculaceae	g__norank_f__Muribaculaceae	s__uncultured_bacterium_g__norank_f__Muribaculaceae	OTU146	0	2	1	0	4	0	1	3	0	1	32	45	35	31	21	26	55	45	41	38	1	0	0	0	0	0	0	0	0	0
d__Bacteria	k__norank_d__Bacteria	p__Firmicutes	c__Clostridia	o__Clostridiales	f__Lachnospiraceae	g__unclassified_f__Lachnospiraceae	s__unclassified_f__Lachnospiraceae	OTU435	1	0	0	0	0	1	7	0	0	3	4	9	9	21	18	19	8	7	12	10	36	33	25	15	12	26	36	28	29	9
d__Bacteria	k__norank_d__Bacteria	p__Firmicutes	c__Clostridia	o__Clostridiales	f__Lachnospiraceae	g__Roseburia	s__uncultured_bacterium_g__Roseburia	OTU694	5	0	1	0	2	2	1	0	1	0	12	17	12	31	18	6	6	10	14	14	15	54	5	7	2	59	16	25	12	28
d__Bacteria	k__norank_d__Bacteria	p__Firmicutes	c__Clostridia	o__Clostridiales	f__Lachnospiraceae	g__unclassified_f__Lachnospiraceae	s__unclassified_f__Lachnospiraceae	OTU534	1	2	0	0	0	1	0	4	0	4	35	31	33	22	45	31	36	35	18	47	5	4	8	1	5	1	0	4	0	1
d__Bacteria	k__norank_d__Bacteria	p__Bacteroidetes	c__Bacteroidia	o__Bacteroidales	f__Muribaculaceae	g__norank_f__Muribaculaceae	s__uncultured_bacterium_g__norank_f__Muribaculaceae	OTU772	0	2	0	4	0	1	2	2	1	0	3	2	0	0	4	8	1	1	0	5	18	25	89	58	39	15	25	35	18	15
d__Bacteria	k__norank_d__Bacteria	p__Bacteroidetes	c__Bacteroidia	o__Bacteroidales	f__Muribaculaceae	g__norank_f__Muribaculaceae	s__unclassified_g__norank_f__Muribaculaceae	OTU605	3	1	0	1	0	0	1	2	0	4	4	3	9	5	3	2	8	6	1	18	15	26	29	35	48	14	8	42	59	25
d__Bacteria	k__norank_d__Bacteria	p__Firmicutes	c__Clostridia	o__Clostridiales	f__Ruminococcaceae	g__unclassified_f__Ruminococcaceae	s__unclassified_f__Ruminococcaceae	OTU237	1	1	4	1	1	0	2	0	2	0	17	18	28	33	43	15	19	25	68	11	5	4	19	14	7	5	4	8	7	8
d__Bacteria	k__norank_d__Bacteria	p__Bacteroidetes	c__Bacteroidia	o__Bacteroidales	f__Muribaculaceae	g__norank_f__Muribaculaceae	s__uncultured_bacterium_g__norank_f__Muribaculaceae	OTU770	1	2	0	6	0	1	0	0	1	0	27	47	51	56	12	21	38	24	32	47	0	1	0	0	0	0	1	0	0	0
d__Bacteria	k__norank_d__Bacteria	p__Bacteroidetes	c__Bacteroidia	o__Bacteroidales	f__Muribaculaceae	g__norank_f__Muribaculaceae	s__uncultured_bacterium_g__norank_f__Muribaculaceae	OTU963	0	6	0	1	1	2	0	0	0	1	1	18	35	40	0	1	18	7	3	0	14	28	35	44	36	12	31	12	18	3
d__Bacteria	k__norank_d__Bacteria	p__Firmicutes	c__Clostridia	o__Clostridiales	f__Lachnospiraceae	g__unclassified_f__Lachnospiraceae	s__unclassified_f__Lachnospiraceae	OTU152	3	2	0	0	1	0	0	1	0	4	11	2	18	35	0	21	3	54	36	36	2	54	2	15	8	14	21	1	5	15
d__Bacteria	k__norank_d__Bacteria	p__Firmicutes	c__Clostridia	o__Clostridiales	f__Lachnospiraceae	g__norank_f__Lachnospiraceae	s__uncultured_bacterium_g__norank_f__Lachnospiraceae	OTU75	0	2	0	5	0	0	0	2	1	1	17	19	12	6	6	7	4	14	15	5	29	30	34	6	11	24	39	35	18	19
d__Bacteria	k__norank_d__Bacteria	p__Firmicutes	c__Erysipelotrichia	o__Erysipelotrichales	f__Erysipelotrichaceae	g__Allobaculum	s__uncultured_bacterium_g__Allobaculum	OTU116	2	0	4	1	2	0	1	0	0	1	32	0	0	0	0	0	0	0	10	1	112	20	2	0	0	9	0	40	105	11
d__Bacteria	k__norank_d__Bacteria	p__Firmicutes	c__Clostridia	o__Clostridiales	f__Ruminococcaceae	g__Ruminococcus_1	s__unclassified_g__Ruminococcus_1	OTU847	0	0	2	0	0	0	0	8	0	0	18	12	26	18	7	11	9	24	12	42	8	35	20	33	21	0	9	0	21	8
d__Bacteria	k__norank_d__Bacteria	p__Bacteroidetes	c__Bacteroidia	o__Bacteroidales	f__Muribaculaceae	g__norank_f__Muribaculaceae	s__uncultured_bacterium_g__norank_f__Muribaculaceae	OTU986	0	0	0	4	0	0	0	0	3	3	13	0	0	0	28	5	8	1	0	10	17	28	38	48	47	5	24	12	27	18
d__Bacteria	k__norank_d__Bacteria	p__Firmicutes	c__Clostridia	o__Clostridiales	f__Lachnospiraceae	g__Roseburia	s__Clostridium_sp._Clone-44	OTU825	0	4	0	1	0	2	0	2	0	1	3	10	7	21	30	8	7	5	23	13	2	12	9	25	33	30	31	21	18	21
d__Bacteria	k__norank_d__Bacteria	p__Bacteroidetes	c__Bacteroidia	o__Bacteroidales	f__Muribaculaceae	g__norank_f__Muribaculaceae	s__uncultured_bacterium_g__norank_f__Muribaculaceae	OTU872	0	0	0	4	0	0	2	0	0	4	61	14	0	1	54	59	23	56	15	43	1	0	0	0	0	0	0	0	0	0
d__Bacteria	k__norank_d__Bacteria	p__Firmicutes	c__Clostridia	o__Clostridiales	f__Lachnospiraceae	g__[Eubacterium]_fissicatena_group	s__unclassified_g__[Eubacterium]_fissicatena_group	OTU578	0	0	0	0	0	1	1	0	5	3	65	3	21	57	6	32	35	17	30	15	8	5	4	7	5	0	1	6	8	0
d__Bacteria	k__norank_d__Bacteria	p__Bacteroidetes	c__Bacteroidia	o__Bacteroidales	f__unclassified_o__Bacteroidales	g__unclassified_o__Bacteroidales	s__unclassified_o__Bacteroidales	OTU972	1	2	1	2	0	0	0	2	0	2	24	25	21	18	15	4	8	7	0	3	5	14	25	19	64	4	19	25	18	7
d__Bacteria	k__norank_d__Bacteria	p__Firmicutes	c__Clostridia	o__Clostridiales	f__Ruminococcaceae	g__Ruminococcaceae_UCG-010	s__uncultured_organism_g__Ruminococcaceae_UCG-010	OTU707	0	3	0	1	0	1	2	1	0	1	19	31	13	18	25	9	11	31	25	29	5	7	12	16	18	15	5	8	16	11
d__Bacteria	k__norank_d__Bacteria	p__Firmicutes	c__Clostridia	o__Clostridiales	f__Ruminococcaceae	g__Butyricicoccus	s__uncultured_bacterium_g__Butyricicoccus	OTU535	0	1	1	0	0	0	3	3	0	1	7	4	5	10	2	5	10	14	15	16	15	18	28	26	25	35	16	15	25	32
d__Bacteria	k__norank_d__Bacteria	p__Bacteroidetes	c__Bacteroidia	o__Bacteroidales	f__Muribaculaceae	g__norank_f__Muribaculaceae	s__uncultured_bacterium_g__norank_f__Muribaculaceae	OTU366	5	0	2	1	0	0	0	1	0	0	1	1	0	0	0	0	1	0	0	0	15	29	33	51	55	50	21	24	28	12
d__Bacteria	k__norank_d__Bacteria	p__Firmicutes	c__Clostridia	o__Clostridiales	f__Ruminococcaceae	g__Negativibacillus	s__uncultured_bacterium_g__Negativibacillus	OTU873	0	1	0	1	1	0	2	1	2	1	15	17	46	27	8	30	35	16	8	23	9	18	0	0	8	13	13	9	18	7
d__Bacteria	k__norank_d__Bacteria	p__Firmicutes	c__Clostridia	o__Clostridiales	f__Lachnospiraceae	g__norank_f__Lachnospiraceae	s__uncultured_bacterium_g__norank_f__Lachnospiraceae	OTU356	2	0	0	1	3	1	0	0	1	0	5	6	5	1	4	2	2	1	0	1	21	55	54	3	56	55	19	8	1	16
d__Bacteria	k__norank_d__Bacteria	p__Bacteroidetes	c__Bacteroidia	o__Bacteroidales	f__Muribaculaceae	g__norank_f__Muribaculaceae	s__uncultured_bacterium_g__norank_f__Muribaculaceae	OTU39	2	1	1	1	0	0	0	2	0	1	19	21	40	19	9	5	16	5	7	4	12	29	22	36	21	8	20	5	10	4
d__Bacteria	k__norank_d__Bacteria	p__Firmicutes	c__Clostridia	o__Clostridiales	f__Lachnospiraceae	g__Lachnospiraceae_UCG-001	s__uncultured_bacterium_g__Lachnospiraceae_UCG-001	OTU869	2	1	1	1	0	1	0	0	0	2	15	2	1	31	31	6	45	39	0	19	1	1	0	22	1	0	52	14	11	19
d__Bacteria	k__norank_d__Bacteria	p__Firmicutes	c__Clostridia	o__Clostridiales	f__Lachnospiraceae	g__norank_f__Lachnospiraceae	s__uncultured_bacterium_g__norank_f__Lachnospiraceae	OTU425	0	0	0	0	0	0	6	0	0	2	9	18	1	4	15	16	15	18	9	8	14	41	45	15	18	19	21	8	8	8
d__Bacteria	k__norank_d__Bacteria	p__Bacteroidetes	c__Bacteroidia	o__Bacteroidales	f__unclassified_o__Bacteroidales	g__unclassified_o__Bacteroidales	s__unclassified_o__Bacteroidales	OTU1002	2	0	1	1	1	1	0	1	0	0	32	39	36	15	37	30	28	31	28	28	4	0	0	0	0	0	0	0	1	0
d__Bacteria	k__norank_d__Bacteria	p__Bacteroidetes	c__Bacteroidia	o__Bacteroidales	f__Muribaculaceae	g__norank_f__Muribaculaceae	s__uncultured_bacterium_g__norank_f__Muribaculaceae	OTU48	0	1	1	1	0	1	0	1	2	0	14	55	25	20	5	1	15	0	11	0	5	3	29	51	44	0	2	5	13	11
d__Bacteria	k__norank_d__Bacteria	p__Firmicutes	c__Clostridia	o__Clostridiales	f__Lachnospiraceae	g__unclassified_f__Lachnospiraceae	s__unclassified_f__Lachnospiraceae	OTU353	0	2	0	1	0	0	0	2	2	0	14	15	1	17	4	5	22	8	13	2	8	15	36	54	55	16	9	4	1	8
d__Bacteria	k__norank_d__Bacteria	p__Bacteroidetes	c__Bacteroidia	o__Bacteroidales	f__Muribaculaceae	g__norank_f__Muribaculaceae	s__uncultured_bacterium_g__norank_f__Muribaculaceae	OTU55	3	0	1	1	0	1	0	1	0	0	4	0	5	0	0	5	0	2	0	1	2	4	54	72	54	2	9	14	21	57
d__Bacteria	k__norank_d__Bacteria	p__Firmicutes	c__Clostridia	o__Clostridiales	f__Lachnospiraceae	g__Lachnospiraceae_NK4A136_group	s__Lachnospiraceae_g__Lachnospiraceae_NK4A136_group	OTU202	0	2	0	1	0	0	4	0	0	0	7	5	11	8	2	7	17	5	0	8	8	16	15	3	8	45	14	18	10	98
d__Bacteria	k__norank_d__Bacteria	p__Firmicutes	c__Clostridia	o__Clostridiales	f__Lachnospiraceae	g__norank_f__Lachnospiraceae	s__unclassified_g__norank_f__Lachnospiraceae	OTU292	0	2	2	0	0	0	0	1	1	0	14	25	1	2	18	4	2	3	2	8	18	54	10	12	13	7	25	26	32	29
d__Bacteria	k__norank_d__Bacteria	p__Firmicutes	c__Clostridia	o__Clostridiales	f__Ruminococcaceae	g__Ruminococcaceae_UCG-014	s__uncultured_bacterium_g__Ruminococcaceae_UCG-014	OTU517	4	0	1	0	0	0	0	0	0	1	9	13	15	4	16	6	52	2	24	25	5	5	12	21	8	25	18	18	12	14
d__Bacteria	k__norank_d__Bacteria	p__Firmicutes	c__Clostridia	o__Clostridiales	f__Lachnospiraceae	g__Marvinbryantia	s__uncultured_bacterium_g__Marvinbryantia	OTU667	1	1	0	0	2	0	0	2	0	0	12	36	19	16	2	2	15	15	12	24	5	32	7	8	5	35	8	15	4	32
d__Bacteria	k__norank_d__Bacteria	p__Bacteroidetes	c__Bacteroidia	o__Bacteroidales	f__unclassified_o__Bacteroidales	g__unclassified_o__Bacteroidales	s__unclassified_o__Bacteroidales	OTU552	0	1	3	0	1	0	0	0	0	1	8	45	19	8	6	6	10	6	0	9	18	12	28	22	32	18	11	16	18	4
d__Bacteria	k__norank_d__Bacteria	p__Firmicutes	c__Clostridia	o__Clostridiales	f__Lachnospiraceae	g__norank_f__Lachnospiraceae	s__Clostridium_sp._Culture-54	OTU536	1	2	0	0	2	0	0	0	0	1	4	14	5	5	7	6	22	17	14	6	22	11	17	17	25	25	29	25	18	2
d__Bacteria	k__norank_d__Bacteria	p__Firmicutes	c__Clostridia	o__Clostridiales	f__Lachnospiraceae	g__norank_f__Lachnospiraceae	s__uncultured_bacterium_g__norank_f__Lachnospiraceae	OTU1033	1	0	1	1	3	0	0	0	0	0	5	3	9	10	16	3	2	1	13	4	21	21	29	25	20	25	23	22	13	26
d__Bacteria	k__norank_d__Bacteria	p__Firmicutes	c__Clostridia	o__Clostridiales	f__Ruminococcaceae	g__Ruminococcaceae_UCG-014	s__unclassified_g__Ruminococcaceae_UCG-014	OTU800	1	1	2	0	2	0	0	0	0	0	18	2	1	6	1	52	12	36	19	55	4	25	21	9	1	2	9	8	8	1
d__Bacteria	k__norank_d__Bacteria	p__Firmicutes	c__Erysipelotrichia	o__Erysipelotrichales	f__Erysipelotrichaceae	g__Turicibacter	s__uncultured_bacterium_g__Turicibacter	OTU185	0	0	5	0	0	0	0	1	0	0	54	12	3	25	55	36	36	39	0	12	11	7	0	0	0	0	0	0	0	0
d__Bacteria	k__norank_d__Bacteria	p__Firmicutes	c__Clostridia	o__Clostridiales	f__Family_XIII	g__Family_XIII_UCG-001	s__uncultured_bacterium_g__Family_XIII_UCG-001	OTU472	2	0	1	0	1	1	0	0	0	1	11	6	5	12	16	6	2	8	1	5	10	25	28	29	28	19	28	8	19	21
d__Bacteria	k__norank_d__Bacteria	p__Firmicutes	c__Clostridia	o__Clostridiales	f__Lachnospiraceae	g__Lachnospiraceae_UCG-001	s__uncultured_bacterium_g__Lachnospiraceae_UCG-001	OTU132	0	0	1	1	2	0	0	1	0	0	0	1	1	11	0	1	5	5	0	11	25	65	15	18	12	14	18	25	34	25
d__Bacteria	k__norank_d__Bacteria	p__Firmicutes	c__Clostridia	o__Clostridiales	f__Ruminococcaceae	g__Ruminococcaceae_NK4A214_group	s__unclassified_g__Ruminococcaceae_NK4A214_group	OTU775	1	1	0	1	1	1	0	0	0	0	16	18	9	18	6	9	8	21	19	17	10	15	7	8	24	29	18	15	11	8
d__Bacteria	k__norank_d__Bacteria	p__Firmicutes	c__Clostridia	o__Clostridiales	f__Ruminococcaceae	g__Ruminococcaceae_UCG-014	s__unclassified_g__Ruminococcaceae_UCG-014	OTU204	0	3	0	0	0	0	0	0	1	1	47	12	0	14	12	56	51	31	14	44	1	1	0	0	0	0	0	0	2	0
d__Bacteria	k__norank_d__Bacteria	p__Firmicutes	c__Clostridia	o__Clostridiales	f__Lachnospiraceae	g__norank_f__Lachnospiraceae	s__uncultured_bacterium_g__norank_f__Lachnospiraceae	OTU139	0	2	0	3	0	0	0	0	0	0	6	25	25	31	15	9	3	16	17	8	1	7	7	9	6	45	25	16	6	7
d__Bacteria	k__norank_d__Bacteria	p__Tenericutes	c__Mollicutes	o__Mollicutes_RF39	f__norank_o__Mollicutes_RF39	g__norank_f__norank_o__Mollicutes_RF39	s__uncultured_bacterium_g__norank_f__norank_o__Mollicutes_RF39	OTU307	0	2	1	2	0	0	0	0	0	0	10	35	25	8	24	17	4	10	31	22	22	13	1	1	0	35	1	15	8	1
d__Bacteria	k__norank_d__Bacteria	p__Firmicutes	c__Clostridia	o__Clostridiales	f__Ruminococcaceae	g__Anaerotruncus	s__uncultured_bacterium_g__Anaerotruncus	OTU920	0	2	3	0	0	0	0	0	0	0	12	12	9	10	10	14	5	12	20	20	13	15	22	13	18	21	19	21	15	2
d__Bacteria	k__norank_d__Bacteria	p__Firmicutes	c__Clostridia	o__Clostridiales	f__Lachnospiraceae	g__unclassified_f__Lachnospiraceae	s__unclassified_f__Lachnospiraceae	OTU966	0	0	0	2	0	1	0	2	0	0	5	36	2	5	1	3	4	2	1	7	25	44	15	18	42	35	18	4	7	5
d__Bacteria	k__norank_d__Bacteria	p__Firmicutes	c__Clostridia	o__Clostridiales	f__Lachnospiraceae	g__unclassified_f__Lachnospiraceae	s__unclassified_f__Lachnospiraceae	OTU852	1	1	2	0	1	0	0	0	0	0	27	0	0	9	1	1	29	31	13	5	4	21	25	5	2	18	71	7	1	7
d__Bacteria	k__norank_d__Bacteria	p__Bacteroidetes	c__Bacteroidia	o__Bacteroidales	f__Muribaculaceae	g__norank_f__Muribaculaceae	s__uncultured_bacterium_g__norank_f__Muribaculaceae	OTU862	1	0	1	0	0	0	0	0	0	3	29	15	21	59	7	29	61	24	0	28	0	0	0	0	0	0	0	0	1	0
d__Bacteria	k__norank_d__Bacteria	p__Firmicutes	c__Clostridia	o__Clostridiales	f__Ruminococcaceae	g__Ruminiclostridium_5	s__unclassified_g__Ruminiclostridium_5	OTU375	2	0	0	0	2	1	0	0	0	0	14	1	8	12	10	14	12	30	33	26	3	1	0	1	2	1	55	28	15	8
d__Bacteria	k__norank_d__Bacteria	p__Firmicutes	c__Clostridia	o__Clostridiales	f__Ruminococcaceae	g__Oscillibacter	s__uncultured_bacterium_g__Oscillibacter	OTU122	0	0	0	0	0	2	0	0	2	0	7	9	13	14	6	7	12	23	0	12	12	10	18	21	27	24	22	8	14	15
d__Bacteria	k__norank_d__Bacteria	p__Proteobacteria	c__Deltaproteobacteria	o__Desulfovibrionales	f__Desulfovibrionaceae	g__norank_f__Desulfovibrionaceae	s__uncultured_Desulfovibrionales_bacterium_g__norank_f__Desulfovibrionaceae	OTU272	0	0	0	1	0	0	0	0	0	3	5	8	10	3	5	1	3	25	10	22	25	15	25	25	26	9	18	19	11	8
d__Bacteria	k__norank_d__Bacteria	p__Bacteroidetes	c__Bacteroidia	o__Bacteroidales	f__unclassified_o__Bacteroidales	g__unclassified_o__Bacteroidales	s__unclassified_o__Bacteroidales	OTU143	0	1	0	1	0	2	0	0	0	0	7	21	25	10	4	1	7	8	0	10	12	12	54	8	24	12	18	18	17	2
d__Bacteria	k__norank_d__Bacteria	p__Firmicutes	c__Clostridia	o__Clostridiales	f__Lachnospiraceae	g__unclassified_f__Lachnospiraceae	s__unclassified_f__Lachnospiraceae	OTU503	0	0	0	0	0	3	1	0	0	0	25	27	3	18	36	31	6	0	1	60	5	2	9	4	2	3	2	10	25	0
d__Bacteria	k__norank_d__Bacteria	p__Bacteroidetes	c__Bacteroidia	o__Bacteroidales	f__Muribaculaceae	g__unclassified_f__Muribaculaceae	s__unclassified_f__Muribaculaceae	OTU108	0	0	0	0	1	0	1	2	0	0	0	15	21	8	0	1	3	2	0	7	10	7	74	19	47	3	1	14	22	15
d__Bacteria	k__norank_d__Bacteria	p__Bacteroidetes	c__Bacteroidia	o__Bacteroidales	f__Muribaculaceae	g__norank_f__Muribaculaceae	s__unclassified_g__norank_f__Muribaculaceae	OTU745	0	0	0	0	0	0	0	0	0	4	36	15	4	0	55	45	35	24	19	31	0	0	1	0	0	0	0	0	0	0
d__Bacteria	k__norank_d__Bacteria	p__Bacteroidetes	c__Bacteroidia	o__Bacteroidales	f__Muribaculaceae	g__norank_f__Muribaculaceae	s__unclassified_g__norank_f__Muribaculaceae	OTU501	0	0	0	0	0	0	3	1	0	0	25	26	12	26	29	26	29	29	34	26	1	1	1	0	0	0	0	0	0	0
d__Bacteria	k__norank_d__Bacteria	p__Firmicutes	c__Clostridia	o__Clostridiales	f__Lachnospiraceae	g__Lachnospiraceae_NK4A136_group	s__uncultured_Clostridiales_bacterium_g__Lachnospiraceae_NK4A136_group	OTU9	0	0	0	0	2	0	1	0	1	0	22	8	1	4	1	5	50	65	45	25	2	1	0	0	1	2	0	25	2	4
d__Bacteria	k__norank_d__Bacteria	p__Bacteroidetes	c__Bacteroidia	o__Bacteroidales	f__Muribaculaceae	g__norank_f__Muribaculaceae	s__uncultured_bacterium_g__norank_f__Muribaculaceae	OTU480	0	3	1	0	0	0	0	0	0	0	25	28	24	23	33	29	38	21	12	28	1	0	0	0	1	0	0	0	0	0
d__Bacteria	k__norank_d__Bacteria	p__Bacteroidetes	c__Bacteroidia	o__Bacteroidales	f__Prevotellaceae	g__Alloprevotella	s__unclassified_g__Alloprevotella	OTU832	1	1	0	1	0	1	0	0	0	0	7	68	31	44	14	26	27	36	0	5	0	1	1	0	1	1	0	0	0	0
d__Bacteria	k__norank_d__Bacteria	p__Firmicutes	c__Clostridia	o__Clostridiales	f__Ruminococcaceae	g__Ruminococcaceae_UCG-009	s__unclassified_g__Ruminococcaceae_UCG-009	OTU644	0	1	0	0	0	0	1	0	0	2	8	23	21	20	4	9	9	18	12	0	5	7	8	14	8	25	18	20	21	12
d__Bacteria	k__norank_d__Bacteria	p__Firmicutes	c__Clostridia	o__Clostridiales	f__Ruminococcaceae	g__Ruminococcaceae_UCG-014	s__unclassified_g__Ruminococcaceae_UCG-014	OTU649	0	0	1	0	0	3	0	0	0	0	8	0	21	11	1	0	0	4	17	7	18	19	21	22	21	19	21	19	8	19
d__Bacteria	k__norank_d__Bacteria	p__Firmicutes	c__Clostridia	o__Clostridiales	f__Lachnospiraceae	g__norank_f__Lachnospiraceae	s__unclassified_g__norank_f__Lachnospiraceae	OTU145	0	0	0	0	0	0	0	0	0	4	5	22	0	13	22	2	22	8	1	9	18	22	1	2	1	55	5	21	7	14
d__Bacteria	k__norank_d__Bacteria	p__Firmicutes	c__Clostridia	o__Clostridiales	f__Peptococcaceae	g__Peptococcus	s__uncultured_bacterium_g__Peptococcus	OTU830	0	0	1	0	1	0	0	0	1	0	22	11	12	14	7	12	9	30	16	16	7	8	8	12	10	9	14	10	8	12
d__Bacteria	k__norank_d__Bacteria	p__Bacteroidetes	c__Bacteroidia	o__Bacteroidales	f__Rikenellaceae	g__Alistipes	s__unclassified_g__Alistipes	OTU1075	0	0	0	0	0	0	1	2	0	0	18	8	20	17	25	18	20	80	1	21	8	7	0	0	0	0	0	0	0	0
d__Bacteria	k__norank_d__Bacteria	p__Bacteroidetes	c__Bacteroidia	o__Bacteroidales	f__Muribaculaceae	g__norank_f__Muribaculaceae	s__unclassified_g__norank_f__Muribaculaceae	OTU1062	0	0	2	0	0	0	1	0	0	0	5	1	30	20	9	8	7	1	0	0	18	25	29	25	34	0	14	2	10	1
d__Bacteria	k__norank_d__Bacteria	p__Firmicutes	c__Clostridia	o__Clostridiales	f__Lachnospiraceae	g__unclassified_f__Lachnospiraceae	s__unclassified_f__Lachnospiraceae	OTU965	1	1	1	0	0	0	0	0	0	0	13	2	13	13	0	6	17	34	12	27	9	10	7	8	5	28	12	10	5	8
d__Bacteria	k__norank_d__Bacteria	p__Bacteroidetes	c__Bacteroidia	o__Bacteroidales	f__Rikenellaceae	g__Alistipes	s__Faecalibacterium_prausnitzii_g__Alistipes	OTU751	2	0	1	0	0	0	0	0	0	0	15	5	15	13	11	12	11	18	20	17	10	8	15	18	10	8	9	8	7	5
d__Bacteria	k__norank_d__Bacteria	p__Bacteroidetes	c__Bacteroidia	o__Bacteroidales	f__unclassified_o__Bacteroidales	g__unclassified_o__Bacteroidales	s__unclassified_o__Bacteroidales	OTU355	1	0	0	0	1	0	0	0	1	0	5	16	20	7	9	6	22	3	0	2	12	15	18	4	4	14	20	18	21	18
d__Bacteria	k__norank_d__Bacteria	p__Firmicutes	c__Clostridia	o__Clostridiales	f__Lachnospiraceae	g__Roseburia	s__Lachnospiraceae_bacterium_DW52	OTU182	0	0	1	0	0	0	2	0	0	0	0	0	0	0	40	1	3	3	6	0	2	25	21	33	11	36	14	26	1	6
d__Bacteria	k__norank_d__Bacteria	p__Bacteroidetes	c__Bacteroidia	o__Bacteroidales	f__Muribaculaceae	g__norank_f__Muribaculaceae	s__uncultured_bacterium_g__norank_f__Muribaculaceae	OTU335	1	0	1	0	0	1	0	0	0	0	1	0	0	1	0	0	0	0	0	0	18	21	18	18	8	32	33	34	24	18
d__Bacteria	k__norank_d__Bacteria	p__Bacteroidetes	c__Bacteroidia	o__Bacteroidales	f__unclassified_o__Bacteroidales	g__unclassified_o__Bacteroidales	s__unclassified_o__Bacteroidales	OTU499	1	0	0	0	1	0	1	0	0	0	7	19	11	6	5	3	8	14	0	15	21	20	15	17	15	12	8	12	10	7
d__Bacteria	k__norank_d__Bacteria	p__Firmicutes	c__Clostridia	o__Clostridiales	f__unclassified_o__Clostridiales	g__unclassified_o__Clostridiales	s__unclassified_o__Clostridiales	OTU819	0	0	0	0	1	0	2	0	0	0	3	9	16	20	8	3	4	4	0	5	1	7	32	19	23	15	6	21	11	17
d__Bacteria	k__norank_d__Bacteria	p__Firmicutes	c__Clostridia	o__Clostridiales	f__Lachnospiraceae	g__unclassified_f__Lachnospiraceae	s__unclassified_f__Lachnospiraceae	OTU562	0	1	1	0	0	0	0	0	0	0	8	6	5	44	9	7	8	6	44	2	8	31	1	0	0	1	3	36	3	2
d__Bacteria	k__norank_d__Bacteria	p__Firmicutes	c__Clostridia	o__Clostridiales	f__Lachnospiraceae	g__Lachnospiraceae_NK4A136_group	s__uncultured_bacterium_g__Lachnospiraceae_NK4A136_group	OTU275	0	0	0	0	0	2	0	0	0	0	50	1	0	1	0	0	19	0	0	127	0	0	0	2	0	0	0	1	9	7
d__Bacteria	k__norank_d__Bacteria	p__Bacteroidetes	c__Bacteroidia	o__Bacteroidales	f__Muribaculaceae	g__norank_f__Muribaculaceae	s__uncultured_bacterium_g__norank_f__Muribaculaceae	OTU37	1	0	0	1	0	0	0	0	0	0	1	4	10	6	3	1	4	3	0	11	5	26	31	12	30	4	8	5	18	34
d__Bacteria	k__norank_d__Bacteria	p__Firmicutes	c__Clostridia	o__Clostridiales	f__Lachnospiraceae	g__Lachnoclostridium	s__unclassified_g__Lachnoclostridium	OTU134	0	0	0	0	0	0	0	0	0	2	6	0	45	21	5	2	26	11	14	0	8	6	15	9	8	7	1	6	8	15
d__Bacteria	k__norank_d__Bacteria	p__Bacteroidetes	c__Bacteroidia	o__Bacteroidales	f__Muribaculaceae	g__norank_f__Muribaculaceae	s__unclassified_g__norank_f__Muribaculaceae	OTU579	0	0	0	0	0	0	0	0	0	2	8	11	17	13	11	4	9	3	0	2	18	26	9	8	15	11	24	15	4	3
d__Bacteria	k__norank_d__Bacteria	p__Firmicutes	c__Clostridia	o__Clostridiales	f__Lachnospiraceae	g__Lachnospiraceae_NK4A136_group	s__uncultured_bacterium_g__Lachnospiraceae_NK4A136_group	OTU706	0	0	0	0	0	0	2	0	0	0	5	9	7	6	13	7	10	6	5	4	8	16	7	2	2	8	29	23	28	13
d__Bacteria	k__norank_d__Bacteria	p__Firmicutes	c__Clostridia	o__Clostridiales	f__Lachnospiraceae	g__Roseburia	s__uncultured_bacterium_g__Roseburia	OTU859	0	0	0	0	0	0	0	0	0	2	37	0	0	0	0	20	33	8	52	0	1	2	1	12	8	7	8	5	10	3
d__Bacteria	k__norank_d__Bacteria	p__Firmicutes	c__Clostridia	o__Clostridiales	f__Lachnospiraceae	g__norank_f__Lachnospiraceae	s__unclassified_g__norank_f__Lachnospiraceae	OTU1037	0	0	0	0	0	0	1	1	0	0	18	15	18	10	25	25	13	10	0	3	2	8	2	0	1	12	9	5	9	21
d__Bacteria	k__norank_d__Bacteria	p__Firmicutes	c__Clostridia	o__Clostridiales	f__Lachnospiraceae	g__norank_f__Lachnospiraceae	s__unclassified_g__norank_f__Lachnospiraceae	OTU12	1	0	0	0	0	0	0	0	0	1	8	0	0	0	0	1	0	0	2	1	55	1	0	0	0	54	0	34	7	40
d__Bacteria	k__norank_d__Bacteria	p__Bacteroidetes	c__Bacteroidia	o__Bacteroidales	f__Muribaculaceae	g__norank_f__Muribaculaceae	s__unclassified_g__norank_f__Muribaculaceae	OTU1095	0	0	0	0	0	1	0	0	0	1	59	1	0	1	41	32	13	14	0	41	0	0	0	0	0	0	0	0	0	1
d__Bacteria	k__norank_d__Bacteria	p__Firmicutes	c__Clostridia	o__Clostridiales	f__Lachnospiraceae	g__unclassified_f__Lachnospiraceae	s__unclassified_f__Lachnospiraceae	OTU728	0	0	0	1	0	0	0	1	0	0	0	0	51	15	4	4	8	0	2	1	1	11	10	17	8	1	14	12	14	27
d__Bacteria	k__norank_d__Bacteria	p__Firmicutes	c__Clostridia	o__Clostridiales	f__Ruminococcaceae	g__Ruminococcaceae_UCG-005	s__uncultured_Clostridiales_bacterium_g__Ruminococcaceae_UCG-005	OTU638	0	0	0	0	0	0	0	1	0	1	2	14	3	7	9	5	6	17	5	6	0	8	5	4	25	25	2	32	25	0
d__Bacteria	k__norank_d__Bacteria	p__Firmicutes	c__Clostridia	o__Clostridiales	f__Lachnospiraceae	g__unclassified_f__Lachnospiraceae	s__unclassified_f__Lachnospiraceae	OTU5	0	2	0	0	0	0	0	0	0	0	15	0	0	58	1	0	3	5	81	10	4	5	0	0	0	0	2	4	8	3
d__Bacteria	k__norank_d__Bacteria	p__Bacteroidetes	c__Bacteroidia	o__Bacteroidales	f__Muribaculaceae	g__norank_f__Muribaculaceae	s__uncultured_bacterium_g__norank_f__Muribaculaceae	OTU210	0	0	0	0	0	0	1	0	0	1	65	0	18	9	8	16	17	20	0	30	1	2	1	2	1	0	1	2	4	1
d__Bacteria	k__norank_d__Bacteria	p__Bacteroidetes	c__Bacteroidia	o__Bacteroidales	f__Muribaculaceae	g__norank_f__Muribaculaceae	s__uncultured_bacterium_g__norank_f__Muribaculaceae	OTU985	0	0	0	1	0	1	0	0	0	0	11	0	0	0	9	5	1	1	0	6	12	24	31	28	29	2	15	14	8	0
d__Bacteria	k__norank_d__Bacteria	p__Bacteroidetes	c__Bacteroidia	o__Bacteroidales	f__Muribaculaceae	g__norank_f__Muribaculaceae	s__uncultured_bacterium_g__norank_f__Muribaculaceae	OTU102	0	0	0	0	1	0	0	1	0	0	7	12	10	48	4	2	10	28	0	1	2	24	3	2	3	4	12	8	6	8
d__Bacteria	k__norank_d__Bacteria	p__Firmicutes	c__Clostridia	o__Clostridiales	f__Lachnospiraceae	g__unclassified_f__Lachnospiraceae	s__unclassified_f__Lachnospiraceae	OTU354	0	1	0	0	0	0	1	0	0	0	2	1	1	41	74	5	47	21	0	0	1	0	1	0	0	0	0	0	0	0
d__Bacteria	k__norank_d__Bacteria	p__Proteobacteria	c__Alphaproteobacteria	o__Sphingomonadales	f__Sphingomonadaceae	g__Sphingomonas	s__unclassified_g__Sphingomonas	OTU721	0	2	0	0	0	0	0	0	0	0	12	15	16	14	10	10	17	2	55	24	2	1	0	0	1	1	1	8	1	2
d__Bacteria	k__norank_d__Bacteria	p__Bacteroidetes	c__Bacteroidia	o__Bacteroidales	f__Muribaculaceae	g__norank_f__Muribaculaceae	s__uncultured_bacterium_g__norank_f__Muribaculaceae	OTU117	0	0	0	0	0	2	0	0	0	0	1	0	8	2	0	0	0	0	0	0	25	25	19	24	18	7	21	9	18	12
d__Bacteria	k__norank_d__Bacteria	p__Bacteroidetes	c__Bacteroidia	o__Bacteroidales	f__Muribaculaceae	g__norank_f__Muribaculaceae	s__uncultured_bacterium_g__norank_f__Muribaculaceae	OTU1074	1	0	0	0	0	0	0	0	0	1	4	47	8	56	6	11	39	11	0	5	0	0	0	0	1	0	0	0	1	0
d__Bacteria	k__norank_d__Bacteria	p__Bacteroidetes	c__Bacteroidia	o__Bacteroidales	f__Muribaculaceae	g__norank_f__Muribaculaceae	s__uncultured_bacterium_g__norank_f__Muribaculaceae	OTU730	0	0	1	0	0	0	0	0	1	0	5	0	0	0	1	2	1	1	0	1	3	47	42	39	11	1	13	7	11	1
d__Bacteria	k__norank_d__Bacteria	p__Bacteroidetes	c__Bacteroidia	o__Bacteroidales	f__Muribaculaceae	g__norank_f__Muribaculaceae	s__unclassified_g__norank_f__Muribaculaceae	OTU1068	0	0	0	0	0	0	0	2	0	0	28	0	3	2	50	18	6	22	4	49	0	0	2	1	0	0	0	0	0	1
d__Bacteria	k__norank_d__Bacteria	p__Firmicutes	c__Clostridia	o__Clostridiales	f__Ruminococcaceae	g__Harryflintia	s__uncultured_bacterium_g__Harryflintia	OTU999	0	0	0	0	0	0	2	0	0	0	14	21	11	11	11	4	18	11	8	19	7	8	5	8	1	5	2	7	6	5
d__Bacteria	k__norank_d__Bacteria	p__Firmicutes	c__Clostridia	o__Clostridiales	f__Ruminococcaceae	g__Ruminiclostridium	s__uncultured_bacterium_g__Ruminiclostridium	OTU1026	0	0	0	0	0	0	0	0	1	1	4	18	24	12	1	3	7	4	12	7	8	5	4	15	15	8	7	6	4	18
d__Bacteria	k__norank_d__Bacteria	p__Bacteroidetes	c__Bacteroidia	o__Bacteroidales	f__unclassified_o__Bacteroidales	g__unclassified_o__Bacteroidales	s__unclassified_o__Bacteroidales	OTU1046	0	0	0	0	0	0	1	0	0	0	1	0	1	0	1	0	0	1	0	1	15	6	52	19	42	5	3	9	25	0
d__Bacteria	k__norank_d__Bacteria	p__Deferribacteres	c__Deferribacteres	o__Deferribacterales	f__Deferribacteraceae	g__Mucispirillum	s__Mucispirillum_schaedleri_ASF457	OTU1039	0	0	0	0	0	0	0	1	0	0	20	12	9	15	9	1	1	2	9	39	0	2	20	8	31	1	1	0	0	0
d__Bacteria	k__norank_d__Bacteria	p__Firmicutes	c__Clostridia	o__Clostridiales	f__Lachnospiraceae	g__Lachnospiraceae_NK4A136_group	s__uncultured_bacterium_g__Lachnospiraceae_NK4A136_group	OTU7	0	0	0	0	0	0	0	0	0	1	4	1	2	12	0	17	13	23	7	9	18	12	8	8	5	12	7	2	8	12
d__Bacteria	k__norank_d__Bacteria	p__Firmicutes	c__Clostridia	o__Clostridiales	f__Lachnospiraceae	g__Roseburia	s__unclassified_g__Roseburia	OTU315	0	0	0	1	0	0	0	0	0	0	0	21	12	106	1	1	5	3	1	1	8	3	0	0	1	1	8	3	1	1
d__Bacteria	k__norank_d__Bacteria	p__Bacteroidetes	c__Bacteroidia	o__Bacteroidales	f__Muribaculaceae	g__norank_f__Muribaculaceae	s__uncultured_bacterium_g__norank_f__Muribaculaceae	OTU1059	0	0	0	0	0	0	0	1	0	0	34	0	0	1	38	40	10	17	0	36	0	0	0	1	0	0	0	0	0	0
d__Bacteria	k__norank_d__Bacteria	p__Firmicutes	c__Clostridia	o__Clostridiales	f__Lachnospiraceae	g__unclassified_f__Lachnospiraceae	s__unclassified_f__Lachnospiraceae	OTU346	0	0	0	0	0	0	1	0	0	0	1	16	2	1	0	0	3	0	1	5	12	15	18	12	4	13	42	21	2	8
d__Bacteria	k__norank_d__Bacteria	p__Bacteroidetes	c__Bacteroidia	o__Bacteroidales	f__Muribaculaceae	g__norank_f__Muribaculaceae	s__uncultured_bacterium_g__norank_f__Muribaculaceae	OTU744	0	0	0	0	0	0	1	0	0	0	36	0	5	0	42	42	13	10	0	25	0	1	0	0	0	0	0	0	0	0
d__Bacteria	k__norank_d__Bacteria	p__Firmicutes	c__Clostridia	o__Clostridiales	f__Ruminococcaceae	g__unclassified_f__Ruminococcaceae	s__unclassified_f__Ruminococcaceae	OTU291	0	0	0	1	0	0	0	0	0	0	5	9	11	13	7	5	9	16	11	11	5	8	8	6	8	8	4	9	15	6
d__Bacteria	k__norank_d__Bacteria	p__Firmicutes	c__Clostridia	o__Clostridiales	f__Lachnospiraceae	g__norank_f__Lachnospiraceae	s__unclassified_g__norank_f__Lachnospiraceae	OTU824	0	0	1	0	0	0	0	0	0	0	3	9	1	17	10	6	12	29	42	5	0	2	5	8	2	1	10	10	1	1
d__Bacteria	k__norank_d__Bacteria	p__Bacteroidetes	c__Bacteroidia	o__Bacteroidales	f__Tannerellaceae	g__Parabacteroides	s__unclassified_g__Parabacteroides	OTU532	0	0	0	0	0	0	0	0	1	0	0	12	20	11	2	1	10	7	0	9	3	15	18	15	25	2	3	4	15	1
d__Bacteria	k__norank_d__Bacteria	p__Firmicutes	c__Clostridia	o__Clostridiales	f__Ruminococcaceae	g__Ruminococcaceae_UCG-014	s__uncultured_bacterium_g__Ruminococcaceae_UCG-014	OTU441	0	0	0	0	0	0	1	0	0	0	8	12	3	6	0	6	12	1	6	15	15	7	14	12	3	7	25	8	10	3
d__Bacteria	k__norank_d__Bacteria	p__Bacteroidetes	c__Bacteroidia	o__Bacteroidales	f__Muribaculaceae	g__unclassified_f__Muribaculaceae	s__unclassified_f__Muribaculaceae	OTU767	1	0	0	0	0	0	0	0	0	0	0	31	8	3	0	0	0	3	0	5	7	1	27	36	25	5	0	5	15	1
d__Bacteria	k__norank_d__Bacteria	p__Firmicutes	c__Clostridia	o__Clostridiales	f__Lachnospiraceae	g__norank_f__Lachnospiraceae	s__uncultured_bacterium_g__norank_f__Lachnospiraceae	OTU948	0	0	0	1	0	0	0	0	0	0	3	17	3	3	2	3	3	7	2	3	8	25	19	18	15	15	18	2	4	2
d__Bacteria	k__norank_d__Bacteria	p__Bacteroidetes	c__Bacteroidia	o__Bacteroidales	f__Muribaculaceae	g__norank_f__Muribaculaceae	s__uncultured_bacterium_g__norank_f__Muribaculaceae	OTU446	0	0	0	1	0	0	0	0	0	0	17	9	13	7	21	35	23	12	0	32	1	0	0	1	0	0	0	0	0	0
d__Bacteria	k__norank_d__Bacteria	p__Bacteroidetes	c__Bacteroidia	o__Bacteroidales	f__Muribaculaceae	g__norank_f__Muribaculaceae	s__uncultured_bacterium_g__norank_f__Muribaculaceae	OTU20	0	0	0	1	0	0	0	0	0	0	0	0	1	0	0	0	0	0	0	0	9	21	54	11	28	0	18	5	21	2
d__Bacteria	k__norank_d__Bacteria	p__Firmicutes	c__Clostridia	o__Clostridiales	f__Ruminococcaceae	g__Ruminiclostridium	s__uncultured_bacterium_g__Ruminiclostridium	OTU995	0	0	0	0	0	1	0	0	0	0	5	5	18	10	11	7	7	24	0	8	1	6	2	8	7	5	6	12	18	9
d__Bacteria	k__norank_d__Bacteria	p__Bacteroidetes	c__Bacteroidia	o__Bacteroidales	f__Muribaculaceae	g__norank_f__Muribaculaceae	s__uncultured_bacterium_g__norank_f__Muribaculaceae	OTU531	0	1	0	0	0	0	0	0	0	0	0	0	0	0	0	2	0	0	0	2	22	4	25	25	36	12	1	7	18	15
d__Bacteria	k__norank_d__Bacteria	p__Bacteroidetes	c__Bacteroidia	o__Bacteroidales	f__Muribaculaceae	g__norank_f__Muribaculaceae	s__uncultured_bacterium_g__norank_f__Muribaculaceae	OTU1051	0	0	0	0	0	0	0	0	0	1	44	0	0	0	23	50	2	21	0	28	0	0	0	1	0	0	0	0	0	0
d__Bacteria	k__norank_d__Bacteria	p__Bacteroidetes	c__Bacteroidia	o__Bacteroidales	f__unclassified_o__Bacteroidales	g__unclassified_o__Bacteroidales	s__unclassified_o__Bacteroidales	OTU119	0	1	0	0	0	0	0	0	0	0	3	1	0	0	2	3	1	0	0	2	1	3	36	44	10	11	10	8	28	5
d__Bacteria	k__norank_d__Bacteria	p__Firmicutes	c__Clostridia	o__Clostridiales	f__Lachnospiraceae	g__norank_f__Lachnospiraceae	s__uncultured_bacterium_g__norank_f__Lachnospiraceae	OTU565	0	0	0	0	1	0	0	0	0	0	1	76	3	12	4	0	2	2	53	3	3	0	0	0	0	1	0	1	0	5
d__Bacteria	k__norank_d__Bacteria	p__Firmicutes	c__Clostridia	o__Clostridiales	f__Lachnospiraceae	g__Lachnospiraceae_NK4A136_group	s__uncultured_bacterium_g__Lachnospiraceae_NK4A136_group	OTU180	1	0	0	0	0	0	0	0	0	0	4	0	1	2	49	11	3	13	1	0	8	25	1	0	0	21	8	15	2	1
d__Bacteria	k__norank_d__Bacteria	p__Firmicutes	c__Clostridia	o__Clostridiales	f__Lachnospiraceae	g__unclassified_f__Lachnospiraceae	s__unclassified_f__Lachnospiraceae	OTU840	0	1	0	0	0	0	0	0	0	0	2	5	4	26	5	6	15	7	8	2	13	1	13	18	10	3	8	9	8	2
d__Bacteria	k__norank_d__Bacteria	p__Firmicutes	c__Clostridia	o__Clostridiales	f__Ruminococcaceae	g__Ruminococcaceae_UCG-013	s__unclassified_g__Ruminococcaceae_UCG-013	OTU885	0	0	0	0	0	0	0	1	0	0	4	2	3	3	6	1	24	6	2	1	1	7	15	21	7	8	18	5	1	30
d__Bacteria	k__norank_d__Bacteria	p__Firmicutes	c__Clostridia	o__Clostridiales	f__Clostridiales_vadinBB60_group	g__norank_f__Clostridiales_vadinBB60_group	s__unclassified_g__norank_f__Clostridiales_vadinBB60_group	OTU4	0	1	0	0	0	0	0	0	0	0	8	15	14	6	12	2	11	5	7	4	8	5	5	7	12	8	9	10	8	7
d__Bacteria	k__norank_d__Bacteria	p__Bacteroidetes	c__Bacteroidia	o__Bacteroidales	f__Muribaculaceae	g__norank_f__Muribaculaceae	s__unclassified_g__norank_f__Muribaculaceae	OTU118	1	0	0	0	0	0	0	0	0	0	6	13	8	9	4	4	6	1	0	6	9	1	7	9	8	19	0	29	18	4
d__Bacteria	k__norank_d__Bacteria	p__Firmicutes	c__Clostridia	o__Clostridiales	f__Lachnospiraceae	g__unclassified_f__Lachnospiraceae	s__unclassified_f__Lachnospiraceae	OTU798	1	0	0	0	0	0	0	0	0	0	5	1	1	58	10	0	30	2	0	1	0	0	0	0	0	12	15	18	5	2
d__Bacteria	k__norank_d__Bacteria	p__Firmicutes	c__Clostridia	o__Clostridiales	f__Lachnospiraceae	g__Lachnospiraceae_NK4A136_group	s__uncultured_bacterium_g__Lachnospiraceae_NK4A136_group	OTU431	0	0	0	0	0	0	0	0	0	1	9	4	0	12	5	40	18	4	27	2	0	0	0	0	12	1	5	4	15	1
d__Bacteria	k__norank_d__Bacteria	p__Firmicutes	c__Clostridia	o__Clostridiales	f__Lachnospiraceae	g__GCA-900066575	s__uncultured_bacterium_g__GCA-900066575	OTU537	0	0	0	0	0	0	0	1	0	0	5	3	25	8	12	9	7	4	2	7	2	8	9	28	7	8	9	0	1	4
d__Bacteria	k__norank_d__Bacteria	p__Firmicutes	c__Clostridia	o__Clostridiales	f__Peptococcaceae	g__norank_f__Peptococcaceae	s__unclassified_g__norank_f__Peptococcaceae	OTU115	0	0	0	0	0	0	0	0	0	1	3	6	5	3	3	6	3	1	1	1	13	20	15	14	6	5	19	21	8	5
d__Bacteria	k__norank_d__Bacteria	p__Bacteroidetes	c__Bacteroidia	o__Chitinophagales	f__Chitinophagaceae	g__Vibrionimonas	s__uncultured_bacterium_g__Vibrionimonas	OTU233	0	0	0	0	0	0	0	0	0	0	0	0	0	0	0	0	0	0	147	0	0	0	0	0	0	0	0	0	0	1
d__Bacteria	k__norank_d__Bacteria	p__Firmicutes	c__Clostridia	o__Clostridiales	f__Ruminococcaceae	g__Ruminococcus_1	s__unclassified_g__Ruminococcus_1	OTU1084	0	0	0	0	0	0	0	0	0	0	3	12	11	20	19	11	12	5	2	6	27	0	1	0	0	0	0	8	10	0
d__Bacteria	k__norank_d__Bacteria	p__Bacteroidetes	c__Bacteroidia	o__Bacteroidales	f__Muribaculaceae	g__norank_f__Muribaculaceae	s__unclassified_g__norank_f__Muribaculaceae	OTU95	0	0	0	0	0	0	0	0	0	0	3	18	10	3	2	3	5	2	8	4	3	1	10	7	3	25	1	18	10	10
d__Bacteria	k__norank_d__Bacteria	p__Firmicutes	c__Clostridia	o__Clostridiales	f__Ruminococcaceae	g__unclassified_f__Ruminococcaceae	s__unclassified_f__Ruminococcaceae	OTU488	0	0	0	0	0	0	0	0	0	0	15	7	12	3	7	11	15	12	7	14	6	4	2	1	1	8	4	8	8	1
d__Bacteria	k__norank_d__Bacteria	p__Bacteroidetes	c__Bacteroidia	o__Bacteroidales	f__Muribaculaceae	g__norank_f__Muribaculaceae	s__uncultured_Bacteroidales_bacterium_g__norank_f__Muribaculaceae	OTU896	0	0	0	0	0	0	0	0	0	0	1	1	1	2	3	7	6	0	0	2	5	2	0	0	4	28	1	26	1	56
d__Bacteria	k__norank_d__Bacteria	p__Firmicutes	c__Bacilli	o__Lactobacillales	f__Lactobacillaceae	g__Lactobacillus	s__Lactobacillus_reuteri	OTU257	0	0	0	0	0	0	0	0	0	0	28	5	2	14	11	5	8	3	11	4	12	15	2	8	9	0	8	0	0	1
d__Bacteria	k__norank_d__Bacteria	p__Firmicutes	c__Clostridia	o__Clostridiales	f__Lachnospiraceae	g__unclassified_f__Lachnospiraceae	s__unclassified_f__Lachnospiraceae	OTU1081	0	0	0	0	0	0	0	0	0	0	0	2	5	5	8	0	7	10	0	10	1	0	0	0	0	59	0	16	5	15
d__Bacteria	k__norank_d__Bacteria	p__Bacteroidetes	c__Bacteroidia	o__Bacteroidales	f__Rikenellaceae	g__Alistipes	s__unclassified_g__Alistipes	OTU988	0	0	0	0	0	0	0	0	0	0	6	0	4	8	3	3	2	11	0	5	22	26	18	4	6	0	10	5	9	0
d__Bacteria	k__norank_d__Bacteria	p__Bacteroidetes	c__Bacteroidia	o__Bacteroidales	f__Muribaculaceae	g__norank_f__Muribaculaceae	s__unclassified_g__norank_f__Muribaculaceae	OTU345	0	0	0	0	0	0	0	0	0	0	7	11	10	12	15	7	12	6	12	7	4	4	8	7	4	2	1	3	4	5
d__Bacteria	k__norank_d__Bacteria	p__Firmicutes	c__Clostridia	o__Clostridiales	f__Lachnospiraceae	g__[Eubacterium]_oxidoreducens_group	s__uncultured_bacterium_g__[Eubacterium]_oxidoreducens_group	OTU194	0	0	0	0	0	0	0	0	0	0	1	0	0	6	3	5	1	1	0	11	21	21	15	21	12	15	1	4	2	0
d__Bacteria	k__norank_d__Bacteria	p__Firmicutes	c__Clostridia	o__Clostridiales	f__Lachnospiraceae	g__Lachnoclostridium	s__unclassified_g__Lachnoclostridium	OTU447	0	0	0	0	0	0	0	0	0	0	14	1	10	19	8	12	18	36	2	0	0	1	0	0	2	5	0	7	3	2
d__Bacteria	k__norank_d__Bacteria	p__Bacteroidetes	c__Bacteroidia	o__Bacteroidales	f__Muribaculaceae	g__norank_f__Muribaculaceae	s__uncultured_bacterium_g__norank_f__Muribaculaceae	OTU342	0	0	0	0	0	0	0	0	0	0	1	1	1	2	3	1	0	0	0	2	10	32	17	11	13	2	12	11	2	19
d__Bacteria	k__norank_d__Bacteria	p__Firmicutes	c__Clostridia	o__Clostridiales	f__Ruminococcaceae	g__unclassified_f__Ruminococcaceae	s__unclassified_f__Ruminococcaceae	OTU1094	0	0	0	0	0	0	0	0	0	0	4	7	2	3	4	8	9	6	0	3	8	15	12	3	0	8	15	8	9	15
d__Bacteria	k__norank_d__Bacteria	p__Bacteroidetes	c__Bacteroidia	o__Bacteroidales	f__Muribaculaceae	g__norank_f__Muribaculaceae	s__uncultured_bacterium_g__norank_f__Muribaculaceae	OTU301	0	0	0	0	0	0	0	0	0	0	19	12	11	8	12	19	15	7	0	21	0	1	1	2	0	1	0	5	0	5
d__Bacteria	k__norank_d__Bacteria	p__Firmicutes	c__Clostridia	o__Clostridiales	f__Ruminococcaceae	g__Harryflintia	s__uncultured_bacterium_g__Harryflintia	OTU725	0	0	0	0	0	0	0	0	0	0	4	10	6	4	8	11	12	15	21	5	6	4	1	2	2	3	8	5	4	8
d__Bacteria	k__norank_d__Bacteria	p__Bacteroidetes	c__Bacteroidia	o__Bacteroidales	f__Muribaculaceae	g__norank_f__Muribaculaceae	s__uncultured_bacterium_g__norank_f__Muribaculaceae	OTU733	0	0	0	0	0	0	0	0	0	0	5	0	0	0	7	3	2	0	0	1	15	18	20	18	33	1	8	3	3	1
d__Bacteria	k__norank_d__Bacteria	p__Bacteroidetes	c__Bacteroidia	o__Bacteroidales	f__Muribaculaceae	g__norank_f__Muribaculaceae	s__unclassified_g__norank_f__Muribaculaceae	OTU320	0	0	0	0	0	0	0	0	0	0	6	4	3	6	3	8	1	3	0	3	2	8	11	15	12	0	10	3	39	1
d__Bacteria	k__norank_d__Bacteria	p__Bacteroidetes	c__Bacteroidia	o__Bacteroidales	f__Muribaculaceae	g__norank_f__Muribaculaceae	s__uncultured_bacterium_g__norank_f__Muribaculaceae	OTU1043	0	0	0	0	0	0	0	0	0	0	33	12	0	1	15	23	17	19	0	12	0	2	1	2	1	0	0	0	0	0
d__Bacteria	k__norank_d__Bacteria	p__Bacteroidetes	c__Bacteroidia	o__Bacteroidales	f__Prevotellaceae	g__Alloprevotella	s__uncultured_Bacteroidales_bacterium_g__Alloprevotella	OTU469	0	0	0	0	0	0	0	0	0	0	1	21	12	9	15	1	4	0	0	1	1	0	10	11	25	3	3	7	13	0
d__Bacteria	k__norank_d__Bacteria	p__Firmicutes	c__Clostridia	o__Clostridiales	f__Lachnospiraceae	g__[Eubacterium]_ventriosum_group	s__uncultured_organism_g__[Eubacterium]_ventriosum_group	OTU103	0	0	0	0	0	0	0	0	0	0	0	0	0	0	0	0	0	0	0	0	1	1	36	15	4	35	13	18	9	4
d__Bacteria	k__norank_d__Bacteria	p__Firmicutes	c__Clostridia	o__Clostridiales	f__Lachnospiraceae	g__Tyzzerella	s__uncultured_bacterium_g__Tyzzerella	OTU796	0	0	0	0	0	0	0	0	0	0	5	2	3	5	1	4	8	3	8	10	8	3	4	25	16	7	1	5	10	7
d__Bacteria	k__norank_d__Bacteria	p__Firmicutes	c__Clostridia	o__Clostridiales	f__Lachnospiraceae	g__unclassified_f__Lachnospiraceae	s__unclassified_f__Lachnospiraceae	OTU330	0	0	0	0	0	0	0	0	0	0	13	7	8	8	12	0	4	6	0	2	12	0	8	9	4	4	0	18	0	19
d__Bacteria	k__norank_d__Bacteria	p__Bacteroidetes	c__Bacteroidia	o__Bacteroidales	f__Muribaculaceae	g__norank_f__Muribaculaceae	s__uncultured_bacterium_g__norank_f__Muribaculaceae	OTU56	0	0	0	0	0	0	0	0	0	0	5	16	18	7	3	1	7	5	0	2	3	8	15	22	12	4	0	1	3	0
d__Bacteria	k__norank_d__Bacteria	p__Bacteroidetes	c__Bacteroidia	o__Bacteroidales	f__Muribaculaceae	g__norank_f__Muribaculaceae	s__uncultured_bacterium_g__norank_f__Muribaculaceae	OTU398	0	0	0	0	0	0	0	0	0	0	4	3	5	14	3	7	3	15	7	5	1	4	9	1	12	0	15	14	10	0
d__Bacteria	k__norank_d__Bacteria	p__Bacteroidetes	c__Bacteroidia	o__Bacteroidales	f__Muribaculaceae	g__norank_f__Muribaculaceae	s__uncultured_bacterium_g__norank_f__Muribaculaceae	OTU839	0	0	0	0	0	0	0	0	0	0	14	10	12	12	27	15	10	13	0	16	0	0	0	0	0	0	0	1	0	0
d__Bacteria	k__norank_d__Bacteria	p__Bacteroidetes	c__Bacteroidia	o__Bacteroidales	f__Muribaculaceae	g__norank_f__Muribaculaceae	s__uncultured_bacterium_g__norank_f__Muribaculaceae	OTU542	0	0	0	0	0	0	0	0	0	0	9	18	15	15	25	15	5	4	8	15	0	0	0	0	0	0	0	0	0	0
d__Bacteria	k__norank_d__Bacteria	p__Bacteroidetes	c__Bacteroidia	o__Bacteroidales	f__Muribaculaceae	g__norank_f__Muribaculaceae	s__uncultured_Bacteroidales_bacterium_g__norank_f__Muribaculaceae	OTU620	0	0	0	0	0	0	0	0	0	0	0	0	0	0	0	0	0	1	0	0	1	16	55	23	12	1	18	0	1	0
d__Bacteria	k__norank_d__Bacteria	p__Bacteroidetes	c__Bacteroidia	o__Bacteroidales	f__Muribaculaceae	g__norank_f__Muribaculaceae	s__uncultured_bacterium_g__norank_f__Muribaculaceae	OTU582	0	0	0	0	0	0	0	0	0	0	0	0	0	0	0	0	0	0	0	0	8	18	35	36	18	1	8	1	2	0
d__Bacteria	k__norank_d__Bacteria	p__Bacteroidetes	c__Bacteroidia	o__Bacteroidales	f__Muribaculaceae	g__norank_f__Muribaculaceae	s__uncultured_bacterium_g__norank_f__Muribaculaceae	OTU1072	0	0	0	0	0	0	0	0	0	0	15	16	12	14	9	12	5	18	0	25	0	0	0	0	0	0	1	0	0	0
d__Bacteria	k__norank_d__Bacteria	p__Firmicutes	c__Clostridia	o__Clostridiales	f__Lachnospiraceae	g__[Eubacterium]_oxidoreducens_group	s__uncultured_bacterium_g__[Eubacterium]_oxidoreducens_group	OTU983	0	0	0	0	0	0	0	0	0	0	1	0	1	12	1	8	5	9	0	6	5	12	2	0	2	3	5	33	4	17
d__Bacteria	k__norank_d__Bacteria	p__Bacteroidetes	c__Bacteroidia	o__Bacteroidales	f__Muribaculaceae	g__norank_f__Muribaculaceae	s__uncultured_bacterium_g__norank_f__Muribaculaceae	OTU34	0	0	0	0	0	0	0	0	0	0	0	0	0	5	1	2	0	0	0	5	6	51	18	6	18	0	6	2	6	0
d__Bacteria	k__norank_d__Bacteria	p__Firmicutes	c__Clostridia	o__Clostridiales	f__Ruminococcaceae	g__Ruminiclostridium_5	s__uncultured_Clostridiales_bacterium_g__Ruminiclostridium_5	OTU856	0	0	0	0	0	0	0	0	0	0	0	7	2	5	5	8	1	9	4	1	0	9	5	19	8	2	35	2	0	4
d__Bacteria	k__norank_d__Bacteria	p__Firmicutes	c__Clostridia	o__Clostridiales	f__Lachnospiraceae	g__Coprococcus_3	s__unclassified_g__Coprococcus_3	OTU853	0	0	0	0	0	0	0	0	0	0	9	2	1	9	4	7	8	9	21	11	8	4	2	2	0	9	6	7	4	2
d__Bacteria	k__norank_d__Bacteria	p__Bacteroidetes	c__Bacteroidia	o__Bacteroidales	f__Muribaculaceae	g__Muribaculum	s__unclassified_g__Muribaculum	OTU144	0	0	0	0	0	0	0	0	0	0	22	25	20	8	10	9	13	7	0	8	0	0	0	0	1	0	0	0	0	0
d__Bacteria	k__norank_d__Bacteria	p__Firmicutes	c__Clostridia	o__Clostridiales	f__Ruminococcaceae	g__Oscillibacter	s__uncultured_bacterium_g__Oscillibacter	OTU166	0	0	0	0	0	0	0	0	0	0	1	5	9	7	5	1	2	14	0	9	0	8	7	9	5	4	12	5	7	13
d__Bacteria	k__norank_d__Bacteria	p__Firmicutes	c__Clostridia	o__Clostridiales	f__Lachnospiraceae	g__Lachnospiraceae_NK4A136_group	s__unclassified_g__Lachnospiraceae_NK4A136_group	OTU884	0	0	0	0	0	0	0	0	0	0	0	12	11	2	4	2	6	5	0	0	0	29	18	7	3	24	0	0	0	0
d__Bacteria	k__norank_d__Bacteria	p__Bacteroidetes	c__Bacteroidia	o__Bacteroidales	f__Prevotellaceae	g__Alloprevotella	s__unclassified_g__Alloprevotella	OTU59	0	0	0	0	0	0	0	0	0	0	12	25	3	6	0	0	4	3	0	1	2	1	7	9	18	12	1	11	7	1
d__Bacteria	k__norank_d__Bacteria	p__Firmicutes	c__Clostridia	o__Clostridiales	f__Lachnospiraceae	g__Lachnospiraceae_UCG-006	s__unclassified_g__Lachnospiraceae_UCG-006	OTU954	0	0	0	0	0	0	0	0	0	0	4	3	3	2	7	2	1	3	4	0	0	4	25	5	6	6	39	4	4	1
d__Bacteria	k__norank_d__Bacteria	p__Firmicutes	c__Clostridia	o__Clostridiales	f__Peptococcaceae	g__norank_f__Peptococcaceae	s__uncultured_bacterium_g__norank_f__Peptococcaceae	OTU173	0	0	0	0	0	0	0	0	0	0	4	8	5	3	17	7	8	7	4	1	10	1	4	8	1	7	5	12	4	6
d__Bacteria	k__norank_d__Bacteria	p__Bacteroidetes	c__Bacteroidia	o__Bacteroidales	f__unclassified_o__Bacteroidales	g__unclassified_o__Bacteroidales	s__unclassified_o__Bacteroidales	OTU490	0	0	0	0	0	0	0	0	0	0	2	1	1	1	1	5	1	2	0	1	1	1	11	51	23	2	4	2	12	0
d__Bacteria	k__norank_d__Bacteria	p__Tenericutes	c__Mollicutes	o__Mollicutes_RF39	f__norank_o__Mollicutes_RF39	g__norank_f__norank_o__Mollicutes_RF39	s__unclassified_g__norank_f__norank_o__Mollicutes_RF39	OTU18	0	0	0	0	0	0	0	0	0	0	1	2	1	1	1	0	2	1	1	0	15	12	18	6	30	2	22	0	0	6
d__Bacteria	k__norank_d__Bacteria	p__Firmicutes	c__Clostridia	o__Clostridiales	f__Clostridiales_vadinBB60_group	g__norank_f__Clostridiales_vadinBB60_group	s__unclassified_g__norank_f__Clostridiales_vadinBB60_group	OTU639	0	0	0	0	0	0	0	0	0	0	8	1	15	24	2	4	14	15	13	10	5	0	0	0	1	0	0	6	3	0
d__Bacteria	k__norank_d__Bacteria	p__Bacteroidetes	c__Bacteroidia	o__Bacteroidales	f__Muribaculaceae	g__norank_f__Muribaculaceae	s__uncultured_bacterium_g__norank_f__Muribaculaceae	OTU81	0	0	0	0	0	0	0	0	0	0	1	2	1	2	1	0	0	1	0	3	6	7	18	19	17	21	2	4	4	11
d__Bacteria	k__norank_d__Bacteria	p__Firmicutes	c__Clostridia	o__Clostridiales	f__Lachnospiraceae	g__Lachnospiraceae_UCG-001	s__unclassified_g__Lachnospiraceae_UCG-001	OTU996	0	0	0	0	0	0	0	0	0	0	7	12	11	14	6	5	5	12	18	22	1	1	1	0	0	0	1	1	0	2
d__Bacteria	k__norank_d__Bacteria	p__Bacteroidetes	c__Bacteroidia	o__Bacteroidales	f__Muribaculaceae	g__norank_f__Muribaculaceae	s__unclassified_g__norank_f__Muribaculaceae	OTU597	0	0	0	0	0	0	0	0	0	0	27	1	1	2	15	7	8	6	0	11	0	5	21	0	1	1	10	1	2	0
d__Bacteria	k__norank_d__Bacteria	p__Proteobacteria	c__Gammaproteobacteria	o__Enterobacteriales	f__Enterobacteriaceae	g__Klebsiella	s__Klebsiella_pneumoniae_subsp._pneumoniae_g__Klebsiella	OTU1098	0	0	0	0	0	0	0	0	0	0	9	0	12	0	16	14	3	29	26	10	0	0	0	0	0	0	0	0	0	0
d__Bacteria	k__norank_d__Bacteria	p__Actinobacteria	c__Actinobacteria	o__Bifidobacteriales	f__Bifidobacteriaceae	g__Bifidobacterium	s__unclassified_g__Bifidobacterium	OTU759	0	0	0	0	0	0	0	0	0	0	16	14	15	5	12	11	8	5	17	7	1	1	3	2	0	1	1	0	0	0
d__Bacteria	k__norank_d__Bacteria	p__Bacteroidetes	c__Bacteroidia	o__Bacteroidales	f__Muribaculaceae	g__norank_f__Muribaculaceae	s__uncultured_bacterium_g__norank_f__Muribaculaceae	OTU786	0	0	0	0	0	0	0	0	0	0	13	14	16	7	17	13	17	8	0	12	0	0	0	1	0	0	0	0	0	0
d__Bacteria	k__norank_d__Bacteria	p__Firmicutes	c__Clostridia	o__Clostridiales	f__Lachnospiraceae	g__ASF356	s__uncultured_Clostridiales_bacterium_g__ASF356	OTU73	0	0	0	0	0	0	0	0	0	0	1	5	8	8	0	2	0	6	0	1	1	5	13	6	8	19	29	2	1	3
d__Bacteria	k__norank_d__Bacteria	p__Bacteroidetes	c__Bacteroidia	o__Bacteroidales	f__Rikenellaceae	g__Alistipes	s__uncultured_bacterium_g__Alistipes	OTU359	0	0	0	0	0	0	0	0	0	0	12	9	11	5	18	24	4	9	0	24	1	0	0	0	1	0	0	0	0	0
d__Bacteria	k__norank_d__Bacteria	p__Firmicutes	c__Clostridia	o__Clostridiales	f__Lachnospiraceae	g__Marvinbryantia	s__uncultured_bacterium_g__Marvinbryantia	OTU598	0	0	0	0	0	0	0	0	0	0	8	15	2	5	5	1	0	0	0	0	1	19	7	1	0	20	2	13	0	19
d__Bacteria	k__norank_d__Bacteria	p__Firmicutes	c__Clostridia	o__Clostridiales	f__Lachnospiraceae	g__[Eubacterium]_oxidoreducens_group	s__uncultured_bacterium_g__[Eubacterium]_oxidoreducens_group	OTU62	0	0	0	0	0	0	0	0	0	0	3	9	0	0	7	1	10	1	0	0	0	36	8	24	1	14	1	1	0	1
d__Bacteria	k__norank_d__Bacteria	p__Firmicutes	c__Clostridia	o__Clostridiales	f__Lachnospiraceae	g__unclassified_f__Lachnospiraceae	s__unclassified_f__Lachnospiraceae	OTU838	0	0	0	0	0	0	0	0	0	0	6	7	18	15	2	5	1	0	0	9	12	3	2	9	13	0	10	3	2	0
d__Bacteria	k__norank_d__Bacteria	p__Bacteroidetes	c__Bacteroidia	o__Bacteroidales	f__Muribaculaceae	g__norank_f__Muribaculaceae	s__uncultured_bacterium_g__norank_f__Muribaculaceae	OTU176	0	0	0	0	0	0	0	0	0	0	15	21	15	11	11	21	7	8	0	7	0	0	0	0	0	0	0	0	0	0
d__Bacteria	k__norank_d__Bacteria	p__Firmicutes	c__Clostridia	o__Clostridiales	f__Lachnospiraceae	g__unclassified_f__Lachnospiraceae	s__unclassified_f__Lachnospiraceae	OTU1054	0	0	0	0	0	0	0	0	0	0	2	3	0	1	0	0	4	0	0	0	35	16	5	32	1	0	11	4	0	1
d__Bacteria	k__norank_d__Bacteria	p__Firmicutes	c__Erysipelotrichia	o__Erysipelotrichales	f__Erysipelotrichaceae	g__norank_f__Erysipelotrichaceae	s__unclassified_g__norank_f__Erysipelotrichaceae	OTU989	0	0	0	0	0	0	0	0	0	0	1	0	0	0	1	0	0	1	0	0	2	15	43	8	30	8	0	0	0	5
d__Bacteria	k__norank_d__Bacteria	p__Firmicutes	c__Clostridia	o__Clostridiales	f__Lachnospiraceae	g__unclassified_f__Lachnospiraceae	s__unclassified_f__Lachnospiraceae	OTU131	0	0	0	0	0	0	0	0	0	0	1	6	0	5	2	2	8	1	0	1	0	25	1	1	0	9	4	9	1	37
d__Bacteria	k__norank_d__Bacteria	p__Firmicutes	c__Clostridia	o__Clostridiales	f__Lachnospiraceae	g__unclassified_f__Lachnospiraceae	s__unclassified_f__Lachnospiraceae	OTU33	0	0	0	0	0	0	0	0	0	0	4	5	2	3	4	1	5	2	0	0	4	8	5	0	2	15	35	8	2	8
d__Bacteria	k__norank_d__Bacteria	p__Bacteroidetes	c__Bacteroidia	o__Bacteroidales	f__Muribaculaceae	g__norank_f__Muribaculaceae	s__uncultured_bacterium_g__norank_f__Muribaculaceae	OTU891	0	0	0	0	0	0	0	0	0	0	1	0	0	0	1	1	1	1	0	0	1	25	33	20	10	1	12	4	2	0
d__Bacteria	k__norank_d__Bacteria	p__Firmicutes	c__Clostridia	o__Clostridiales	f__unclassified_o__Clostridiales	g__unclassified_o__Clostridiales	s__unclassified_o__Clostridiales	OTU463	0	0	0	0	0	0	0	0	0	0	0	1	7	5	2	2	2	5	0	3	4	18	9	5	5	3	4	12	7	18
d__Bacteria	k__norank_d__Bacteria	p__Bacteroidetes	c__Bacteroidia	o__Bacteroidales	f__Muribaculaceae	g__norank_f__Muribaculaceae	s__uncultured_bacterium_g__norank_f__Muribaculaceae	OTU722	0	0	0	0	0	0	0	0	0	0	12	11	0	0	6	9	1	3	0	5	14	12	8	8	3	0	5	2	11	0
d__Bacteria	k__norank_d__Bacteria	p__Bacteroidetes	c__Bacteroidia	o__Bacteroidales	f__Muribaculaceae	g__norank_f__Muribaculaceae	s__uncultured_bacterium_g__norank_f__Muribaculaceae	OTU677	0	0	0	0	0	0	0	0	0	0	0	0	0	0	1	0	0	0	0	0	11	15	25	19	10	0	21	2	6	0
d__Bacteria	k__norank_d__Bacteria	p__Firmicutes	c__Clostridia	o__Clostridiales	f__Clostridiales_vadinBB60_group	g__norank_f__Clostridiales_vadinBB60_group	s__uncultured_bacterium_g__norank_f__Clostridiales_vadinBB60_group	OTU654	0	0	0	0	0	0	0	0	0	0	13	11	3	12	7	1	5	6	9	3	2	2	8	7	5	4	4	2	2	4
d__Bacteria	k__norank_d__Bacteria	p__Firmicutes	c__Clostridia	o__Clostridiales	f__Ruminococcaceae	g__unclassified_f__Ruminococcaceae	s__unclassified_f__Ruminococcaceae	OTU975	0	0	0	0	0	0	0	0	0	0	3	4	3	2	4	5	7	3	9	2	2	25	3	7	0	15	4	5	6	1
d__Bacteria	k__norank_d__Bacteria	p__Bacteroidetes	c__Bacteroidia	o__Bacteroidales	f__Prevotellaceae	g__unclassified_f__Prevotellaceae	s__unclassified_f__Prevotellaceae	OTU36	0	0	0	0	0	0	0	0	0	0	0	6	3	3	0	4	0	0	0	0	1	28	14	8	22	0	3	0	18	0
d__Bacteria	k__norank_d__Bacteria	p__Firmicutes	c__Clostridia	o__Clostridiales	f__Clostridiales_vadinBB60_group	g__norank_f__Clostridiales_vadinBB60_group	s__uncultured_bacterium_g__norank_f__Clostridiales_vadinBB60_group	OTU564	0	0	0	0	0	0	0	0	0	0	2	2	9	5	12	15	5	8	16	1	2	2	4	7	4	7	1	3	3	1
d__Bacteria	k__norank_d__Bacteria	p__Firmicutes	c__Clostridia	o__Clostridiales	f__Ruminococcaceae	g__Ruminococcaceae_UCG-014	s__unclassified_g__Ruminococcaceae_UCG-014	OTU67	1	0	0	0	0	0	0	0	0	0	4	8	10	1	9	5	6	8	4	15	0	0	8	5	3	1	2	6	14	0
d__Bacteria	k__norank_d__Bacteria	p__Firmicutes	c__Clostridia	o__Clostridiales	f__Lachnospiraceae	g__Lachnospiraceae_NK4A136_group	s__unclassified_g__Lachnospiraceae_NK4A136_group	OTU1013	16	58	46	40	15	53	51	27	31	1	3	12	2	15	12	15	15	14	12	7	0	0	0	0	0	0	0	1	0	0
d__Bacteria	k__norank_d__Bacteria	p__Firmicutes	c__Clostridia	o__Clostridiales	f__Ruminococcaceae	g__Ruminiclostridium_9	s__uncultured_bacterium_g__Ruminiclostridium_9	OTU408	0	0	0	0	0	0	0	0	0	2	9	7	15	5	5	1	3	8	14	0	0	0	9	4	6	1	8	5	4	4
d__Bacteria	k__norank_d__Bacteria	p__Bacteroidetes	c__Bacteroidia	o__Bacteroidales	f__Muribaculaceae	g__norank_f__Muribaculaceae	s__uncultured_bacterium_g__norank_f__Muribaculaceae	OTU709	0	0	0	0	0	0	0	0	0	0	1	0	2	0	1	0	1	0	0	2	3	25	7	8	10	11	8	6	3	20
d__Bacteria	k__norank_d__Bacteria	p__Bacteroidetes	c__Bacteroidia	o__Bacteroidales	f__Muribaculaceae	g__norank_f__Muribaculaceae	s__uncultured_bacterium_g__norank_f__Muribaculaceae	OTU281	2	0	1	0	0	0	0	4	0	7	0	0	0	0	0	3	4	0	0	0	7	6	29	19	18	7	8	1	4	0
d__Bacteria	k__norank_d__Bacteria	p__Firmicutes	c__Clostridia	o__Clostridiales	f__Ruminococcaceae	g__GCA-900066225	s__unclassified_g__GCA-900066225	OTU465	0	2	6	2	0	0	0	0	0	0	1	3	4	4	6	8	11	12	9	7	7	3	9	5	0	5	3	1	3	2
d__Bacteria	k__norank_d__Bacteria	p__Firmicutes	c__Clostridia	o__Clostridiales	f__Ruminococcaceae	g__Ruminococcaceae_UCG-005	s__uncultured_Clostridiales_bacterium_g__Ruminococcaceae_UCG-005	OTU973	17	4	5	39	6	6	4	4	1	0	4	7	3	4	4	5	9	9	17	7	0	9	10	0	3	2	0	5	3	2
d__Bacteria	k__norank_d__Bacteria	p__Firmicutes	c__Clostridia	o__Clostridiales	f__Ruminococcaceae	g__GCA-900066225	s__unclassified_g__GCA-900066225	OTU177	0	0	0	0	0	0	0	0	0	0	12	8	8	3	8	6	5	15	4	7	0	9	1	7	1	0	0	2	4	0
d__Bacteria	k__norank_d__Bacteria	p__Bacteroidetes	c__Bacteroidia	o__Bacteroidales	f__Muribaculaceae	g__norank_f__Muribaculaceae	s__uncultured_bacterium_g__norank_f__Muribaculaceae	OTU21	0	2	1	0	0	0	0	0	0	0	2	0	0	0	0	0	2	0	0	0	0	5	33	36	14	0	1	0	5	0
d__Bacteria	k__norank_d__Bacteria	p__Bacteroidetes	c__Bacteroidia	o__Bacteroidales	f__Muribaculaceae	g__norank_f__Muribaculaceae	s__uncultured_bacterium_g__norank_f__Muribaculaceae	OTU760	0	0	0	0	0	0	0	0	0	0	7	23	17	3	6	6	14	4	0	17	0	0	0	0	0	0	0	0	0	0
d__Bacteria	k__norank_d__Bacteria	p__Epsilonbacteraeota	c__Campylobacteria	o__Campylobacterales	f__Helicobacteraceae	g__Helicobacter	s__unclassified_g__Helicobacter	OTU566	0	0	0	0	0	0	0	0	0	0	4	7	7	0	6	0	4	0	0	11	0	0	19	10	11	1	5	7	2	2
d__Bacteria	k__norank_d__Bacteria	p__Bacteroidetes	c__Bacteroidia	o__Bacteroidales	f__Muribaculaceae	g__norank_f__Muribaculaceae	s__uncultured_bacterium_g__norank_f__Muribaculaceae	OTU1045	4	4	3	1	6	0	0	2	0	1	5	11	2	28	14	8	15	12	0	1	0	0	0	0	0	0	0	0	0	0
d__Bacteria	k__norank_d__Bacteria	p__Bacteroidetes	c__Bacteroidia	o__Bacteroidales	f__Muribaculaceae	g__norank_f__Muribaculaceae	s__uncultured_bacterium_g__norank_f__Muribaculaceae	OTU82	0	0	0	0	0	0	0	0	0	0	0	0	0	0	0	0	0	0	0	0	0	2	25	35	21	0	4	0	7	0
d__Bacteria	k__norank_d__Bacteria	p__Bacteroidetes	c__Bacteroidia	o__Bacteroidales	f__Muribaculaceae	g__norank_f__Muribaculaceae	s__unclassified_g__norank_f__Muribaculaceae	OTU329	0	0	0	0	0	0	0	0	0	0	1	0	0	0	0	1	0	0	0	2	6	15	9	3	9	3	7	8	6	22
d__Bacteria	k__norank_d__Bacteria	p__Firmicutes	c__Clostridia	o__Clostridiales	f__Lachnospiraceae	g__Lachnospiraceae_UCG-006	s__uncultured_bacterium_g__Lachnospiraceae_UCG-006	OTU506	3	0	0	7	0	0	0	14	0	1	2	1	3	4	0	3	2	1	2	1	12	11	10	2	1	7	14	9	3	3
d__Bacteria	k__norank_d__Bacteria	p__Bacteroidetes	c__Bacteroidia	o__Bacteroidales	f__Muribaculaceae	g__norank_f__Muribaculaceae	s__uncultured_bacterium_g__norank_f__Muribaculaceae	OTU1017	0	1	0	0	0	0	0	0	0	0	12	10	4	6	8	10	15	11	0	14	0	0	0	0	0	0	0	1	0	0
d__Bacteria	k__norank_d__Bacteria	p__Tenericutes	c__Mollicutes	o__Anaeroplasmatales	f__Anaeroplasmataceae	g__Anaeroplasma	s__uncultured_bacterium_g__Anaeroplasma	OTU736	4	0	1	0	0	0	4	2	0	3	3	5	0	5	6	4	10	7	24	3	6	0	0	0	0	8	0	1	5	4
d__Bacteria	k__norank_d__Bacteria	p__Bacteroidetes	c__Bacteroidia	o__Bacteroidales	f__Muribaculaceae	g__norank_f__Muribaculaceae	s__uncultured_bacterium_g__norank_f__Muribaculaceae	OTU844	21	4	27	8	5	3	13	8	4	3	13	0	0	18	12	15	7	8	0	16	0	0	0	1	0	0	0	0	0	0
d__Bacteria	k__norank_d__Bacteria	p__Firmicutes	c__Clostridia	o__Clostridiales	f__Ruminococcaceae	g__Ruminococcaceae_UCG-014	s__uncultured_rumen_bacterium_g__Ruminococcaceae_UCG-014	OTU836	19	25	103	168	26	6	11	1	4	137	4	0	0	3	0	3	2	4	5	6	8	0	2	0	18	21	10	1	2	0
d__Bacteria	k__norank_d__Bacteria	p__Firmicutes	c__Clostridia	o__Clostridiales	f__Lachnospiraceae	g__Roseburia	s__uncultured_bacterium_g__Roseburia	OTU554	0	0	0	0	0	0	0	0	0	0	4	0	6	7	2	4	7	5	4	1	0	2	10	21	12	0	0	1	0	3
d__Bacteria	k__norank_d__Bacteria	p__Firmicutes	c__Clostridia	o__Clostridiales	f__Lachnospiraceae	g__Lachnospiraceae_NK4A136_group	s__uncultured_bacterium_g__Lachnospiraceae_NK4A136_group	OTU125	131	119	41	19	74	0	14	53	0	22	5	9	5	5	4	2	3	2	5	2	3	6	8	3	3	4	7	3	6	4
d__Bacteria	k__norank_d__Bacteria	p__Bacteroidetes	c__Bacteroidia	o__Bacteroidales	f__Muribaculaceae	g__norank_f__Muribaculaceae	s__uncultured_bacterium_g__norank_f__Muribaculaceae	OTU571	0	0	3	1	0	1	3	1	1	0	10	0	0	0	5	6	1	1	0	3	1	9	14	15	19	0	3	0	1	0
d__Bacteria	k__norank_d__Bacteria	p__Bacteroidetes	c__Bacteroidia	o__Bacteroidales	f__Muribaculaceae	g__norank_f__Muribaculaceae	s__uncultured_bacterium_g__norank_f__Muribaculaceae	OTU557	0	39	1	71	1	18	7	1	7	2	1	1	0	2	0	3	0	1	0	1	1	0	28	21	16	0	1	1	11	0
d__Bacteria	k__norank_d__Bacteria	p__Bacteroidetes	c__Bacteroidia	o__Bacteroidales	f__Muribaculaceae	g__norank_f__Muribaculaceae	s__uncultured_bacterium_g__norank_f__Muribaculaceae	OTU57	10	0	9	1	24	0	1	0	0	0	2	0	0	3	6	3	0	3	0	3	5	7	20	14	12	0	6	0	4	0
d__Bacteria	k__norank_d__Bacteria	p__Epsilonbacteraeota	c__Campylobacteria	o__Campylobacterales	f__Helicobacteraceae	g__Helicobacter	s__unclassified_g__Helicobacter	OTU273	0	0	0	0	0	0	0	0	0	0	6	8	7	6	7	1	4	1	6	9	1	1	15	4	2	0	1	5	3	1
d__Bacteria	k__norank_d__Bacteria	p__Bacteroidetes	c__Bacteroidia	o__Bacteroidales	f__Muribaculaceae	g__norank_f__Muribaculaceae	s__uncultured_bacterium_g__norank_f__Muribaculaceae	OTU558	20	39	87	23	24	60	32	9	8	5	7	41	3	14	3	3	5	6	0	5	0	0	0	0	0	0	0	0	0	0
d__Bacteria	k__norank_d__Bacteria	p__Bacteroidetes	c__Bacteroidia	o__Bacteroidales	f__Muribaculaceae	g__norank_f__Muribaculaceae	s__uncultured_bacterium_g__norank_f__Muribaculaceae	OTU1060	0	0	0	0	0	0	0	0	0	0	29	0	0	0	6	15	4	16	1	16	0	0	0	0	0	0	0	0	0	0
d__Bacteria	k__norank_d__Bacteria	p__Firmicutes	c__Clostridia	o__Clostridiales	f__Ruminococcaceae	g__Anaerotruncus	s__uncultured_organism_g__Anaerotruncus	OTU63	3	2	2	3	2	0	0	0	0	0	2	2	5	5	4	3	5	1	10	10	2	3	12	4	2	7	7	2	0	1
d__Bacteria	k__norank_d__Bacteria	p__Firmicutes	c__Clostridia	o__Clostridiales	f__Clostridiales_vadinBB60_group	g__norank_f__Clostridiales_vadinBB60_group	s__uncultured_bacterium_g__norank_f__Clostridiales_vadinBB60_group	OTU217	1	1	0	1	0	5	5	2	2	1	5	6	7	6	3	3	6	12	15	7	1	0	0	0	0	5	1	7	1	1
d__Bacteria	k__norank_d__Bacteria	p__Firmicutes	c__Clostridia	o__Clostridiales	f__Clostridiales_vadinBB60_group	g__norank_f__Clostridiales_vadinBB60_group	s__uncultured_bacterium_g__norank_f__Clostridiales_vadinBB60_group	OTU886	0	0	0	2	0	0	0	0	0	0	3	13	4	6	3	1	6	7	13	2	1	2	1	4	7	0	4	7	2	0
d__Bacteria	k__norank_d__Bacteria	p__Firmicutes	c__Clostridia	o__Clostridiales	f__Lachnospiraceae	g__Tyzzerella_3	s__uncultured_bacterium_g__Tyzzerella_3	OTU10	210	8	115	9	111	0	4	131	0	3	0	0	0	0	0	1	0	0	0	0	1	3	1	0	0	21	10	13	16	18
d__Bacteria	k__norank_d__Bacteria	p__Bacteroidetes	c__Bacteroidia	o__Bacteroidales	f__Muribaculaceae	g__norank_f__Muribaculaceae	s__uncultured_bacterium_g__norank_f__Muribaculaceae	OTU793	0	0	2	0	0	0	1	0	0	0	14	0	0	0	12	11	13	10	9	13	0	0	0	0	0	0	0	0	0	0
d__Bacteria	k__norank_d__Bacteria	p__Bacteroidetes	c__Bacteroidia	o__Bacteroidales	f__Muribaculaceae	g__norank_f__Muribaculaceae	s__uncultured_bacterium_g__norank_f__Muribaculaceae	OTU674	0	0	0	0	0	0	0	0	0	0	5	1	5	4	5	5	3	4	0	5	11	4	3	5	2	2	5	7	6	0
d__Bacteria	k__norank_d__Bacteria	p__Firmicutes	c__Clostridia	o__Clostridiales	f__Lachnospiraceae	g__unclassified_f__Lachnospiraceae	s__unclassified_f__Lachnospiraceae	OTU820	1	0	0	0	0	0	0	0	0	1	0	4	3	9	7	0	10	6	5	2	1	2	4	3	6	6	4	7	2	1
d__Bacteria	k__norank_d__Bacteria	p__Bacteroidetes	c__Bacteroidia	o__Bacteroidales	f__Muribaculaceae	g__norank_f__Muribaculaceae	s__unclassified_g__norank_f__Muribaculaceae	OTU780	0	0	0	1	0	2	0	0	2	1	12	11	9	10	6	7	18	6	1	2	0	0	0	0	0	0	0	0	0	0
d__Bacteria	k__norank_d__Bacteria	p__Firmicutes	c__Clostridia	o__Clostridiales	f__Ruminococcaceae	g__Ruminiclostridium	s__uncultured_bacterium_g__Ruminiclostridium	OTU788	0	0	0	1	3	0	0	0	0	0	2	15	7	5	1	7	1	6	0	7	2	7	1	2	0	4	5	3	5	1
d__Bacteria	k__norank_d__Bacteria	p__Bacteroidetes	c__Bacteroidia	o__Bacteroidales	f__Muribaculaceae	g__norank_f__Muribaculaceae	s__uncultured_Bacteroidales_bacterium_g__norank_f__Muribaculaceae	OTU1063	2	4	6	4	1	2	1	3	1	1	13	0	5	0	7	9	3	12	10	21	0	0	0	0	0	0	0	0	0	0
d__Bacteria	k__norank_d__Bacteria	p__Bacteroidetes	c__Bacteroidia	o__Bacteroidales	f__Muribaculaceae	g__norank_f__Muribaculaceae	s__uncultured_Bacteroidales_bacterium_g__norank_f__Muribaculaceae	OTU1053	0	0	0	0	0	0	0	0	0	0	8	7	0	12	10	13	11	2	0	13	0	0	1	1	0	1	0	0	0	0
d__Bacteria	k__norank_d__Bacteria	p__Firmicutes	c__Clostridia	o__Clostridiales	f__Lachnospiraceae	g__unclassified_f__Lachnospiraceae	s__unclassified_f__Lachnospiraceae	OTU350	0	0	0	0	0	49	23	0	2	0	12	2	15	9	10	9	1	2	0	7	4	2	1	0	0	1	0	0	4	0
d__Bacteria	k__norank_d__Bacteria	p__Bacteroidetes	c__Bacteroidia	o__Bacteroidales	f__Muribaculaceae	g__norank_f__Muribaculaceae	s__uncultured_bacterium_g__norank_f__Muribaculaceae	OTU773	0	0	0	0	0	0	0	0	0	0	9	7	5	0	2	14	4	2	0	11	1	0	13	4	5	1	0	0	0	0
d__Bacteria	k__norank_d__Bacteria	p__Bacteroidetes	c__Bacteroidia	o__Bacteroidales	f__Muribaculaceae	g__norank_f__Muribaculaceae	s__uncultured_bacterium_g__norank_f__Muribaculaceae	OTU746	103	12	136	126	38	100	105	10	36	7	10	8	6	2	7	12	5	12	0	16	0	0	0	0	0	0	0	0	0	0
d__Bacteria	k__norank_d__Bacteria	p__Bacteroidetes	c__Bacteroidia	o__Bacteroidales	f__Tannerellaceae	g__Parabacteroides	s__Parabacteroides_goldsteinii	OTU377	0	33	4	2	0	96	18	0	86	5	7	6	2	3	12	3	7	4	4	4	4	5	2	3	0	0	1	0	2	7
d__Bacteria	k__norank_d__Bacteria	p__Firmicutes	c__Clostridia	o__Clostridiales	f__Ruminococcaceae	g__unclassified_f__Ruminococcaceae	s__unclassified_f__Ruminococcaceae	OTU381	0	0	0	0	0	0	0	0	0	0	4	4	2	2	5	2	4	4	7	8	4	2	3	10	0	1	4	3	2	4
d__Bacteria	k__norank_d__Bacteria	p__Firmicutes	c__Clostridia	o__Clostridiales	f__Lachnospiraceae	g__Lachnospiraceae_NK4A136_group	s__uncultured_Clostridiales_bacterium_g__Lachnospiraceae_NK4A136_group	OTU874	0	2	5	3	13	1	4	1	3	1	0	0	0	0	0	0	0	0	0	0	1	0	1	0	0	71	0	2	0	0
d__Bacteria	k__norank_d__Bacteria	p__Firmicutes	c__Clostridia	o__Clostridiales	f__Christensenellaceae	g__norank_f__Christensenellaceae	s__unclassified_g__norank_f__Christensenellaceae	OTU487	21	27	43	18	11	2	4	9	2	6	3	2	6	6	1	1	4	8	4	5	1	6	1	9	2	2	10	0	2	2
d__Bacteria	k__norank_d__Bacteria	p__Firmicutes	c__Clostridia	o__Clostridiales	f__Lachnospiraceae	g__Lachnospiraceae_NK4A136_group	s__uncultured_bacterium_g__Lachnospiraceae_NK4A136_group	OTU171	1	23	7	0	8	0	23	4	53	0	3	1	1	2	10	6	12	8	5	14	0	2	1	0	0	1	6	0	0	1
d__Bacteria	k__norank_d__Bacteria	p__Firmicutes	c__Clostridia	o__Clostridiales	f__Lachnospiraceae	g__Acetitomaculum	s__unclassified_g__Acetitomaculum	OTU190	0	0	0	0	0	0	0	0	0	0	7	0	1	1	0	11	0	9	10	2	7	0	0	0	0	0	0	20	5	0
d__Bacteria	k__norank_d__Bacteria	p__Firmicutes	c__Clostridia	o__Clostridiales	f__Lachnospiraceae	g__[Eubacterium]_xylanophilum_group	s__uncultured_bacterium_g__[Eubacterium]_xylanophilum_group	OTU494	4	2	6	1	4	3	3	3	1	2	0	0	0	2	0	1	2	0	4	0	0	7	18	2	12	5	19	0	1	0
d__Bacteria	k__norank_d__Bacteria	p__Bacteroidetes	c__Bacteroidia	o__Bacteroidales	f__Marinifilaceae	g__Odoribacter	s__unclassified_g__Odoribacter	OTU1040	8	0	9	0	4	4	18	0	21	12	7	7	8	1	12	12	0	6	0	6	13	0	0	0	0	0	0	0	0	0
d__Bacteria	k__norank_d__Bacteria	p__Firmicutes	c__Clostridia	o__Clostridiales	f__Lachnospiraceae	g__norank_f__Lachnospiraceae	s__uncultured_bacterium_g__norank_f__Lachnospiraceae	OTU931	0	0	0	0	0	0	0	0	0	0	1	8	12	1	8	2	1	2	0	2	6	2	0	4	0	5	6	6	2	4
d__Bacteria	k__norank_d__Bacteria	p__Firmicutes	c__Clostridia	o__Clostridiales	f__Lachnospiraceae	g__norank_f__Lachnospiraceae	s__uncultured_bacterium_g__norank_f__Lachnospiraceae	OTU208	0	0	2	1	0	0	1	4	0	6	4	12	3	0	3	8	0	2	6	4	6	3	1	2	0	0	11	2	0	4
d__Bacteria	k__norank_d__Bacteria	p__Firmicutes	c__Clostridia	o__Clostridiales	f__Ruminococcaceae	g__Ruminococcaceae_UCG-005	s__uncultured_bacterium_g__Ruminococcaceae_UCG-005	OTU998	0	0	0	0	0	0	0	0	0	0	2	2	1	2	1	0	6	8	4	2	0	1	5	15	6	2	1	4	4	5
d__Bacteria	k__norank_d__Bacteria	p__Firmicutes	c__Clostridia	o__Clostridiales	f__Lachnospiraceae	g__unclassified_f__Lachnospiraceae	s__unclassified_f__Lachnospiraceae	OTU61	50	7	90	10	84	28	35	34	12	36	1	8	3	0	3	4	3	4	5	7	2	6	4	9	2	2	2	1	4	0
d__Bacteria	k__norank_d__Bacteria	p__Firmicutes	c__Clostridia	o__Clostridiales	f__Lachnospiraceae	g__unclassified_f__Lachnospiraceae	s__unclassified_f__Lachnospiraceae	OTU909	6	58	12	15	12	66	33	2	47	6	1	12	5	7	0	0	0	8	3	0	3	6	2	3	1	3	3	4	1	7
d__Bacteria	k__norank_d__Bacteria	p__Firmicutes	c__Clostridia	o__Clostridiales	f__Lachnospiraceae	g__unclassified_f__Lachnospiraceae	s__unclassified_f__Lachnospiraceae	OTU205	0	0	0	0	1	0	0	0	0	0	4	1	0	5	2	9	6	1	2	4	0	0	0	0	0	19	0	5	1	8
d__Bacteria	k__norank_d__Bacteria	p__Firmicutes	c__Clostridia	o__Clostridiales	f__Clostridiaceae_1	g__Clostridium_sensu_stricto_1	s__metagenome_g__Clostridium_sensu_stricto_1	OTU455	0	0	0	0	0	0	0	0	0	0	1	11	8	13	1	5	8	5	1	0	6	4	0	2	0	0	2	0	0	0
d__Bacteria	k__norank_d__Bacteria	p__Firmicutes	c__Clostridia	o__Clostridiales	f__Lachnospiraceae	g__Anaerosporobacter	s__unclassified_g__Anaerosporobacter	OTU105	12	11	3	13	0	10	13	18	10	3	1	0	7	2	0	1	7	0	6	1	17	0	0	0	0	8	0	11	2	3
d__Bacteria	k__norank_d__Bacteria	p__Firmicutes	c__Clostridia	o__Clostridiales	f__Lachnospiraceae	g__unclassified_f__Lachnospiraceae	s__unclassified_f__Lachnospiraceae	OTU946	5	4	0	1	3	0	1	4	0	0	0	2	0	0	5	2	1	0	0	0	0	22	8	2	0	15	5	0	0	3
d__Bacteria	k__norank_d__Bacteria	p__Firmicutes	c__Clostridia	o__Clostridiales	f__Lachnospiraceae	g__A2	s__Lachnospiraceae_bacterium_3-1	OTU860	32	86	44	34	39	48	29	14	12	15	16	0	2	1	1	4	6	15	7	5	0	2	0	3	0	1	1	0	0	0
d__Bacteria	k__norank_d__Bacteria	p__Bacteroidetes	c__Bacteroidia	o__Bacteroidales	f__Muribaculaceae	g__norank_f__Muribaculaceae	s__unclassified_g__norank_f__Muribaculaceae	OTU802	166	132	29	88	45	18	119	204	5	85	13	0	0	0	3	13	2	16	0	17	0	0	0	0	0	0	0	0	0	0
d__Bacteria	k__norank_d__Bacteria	p__Bacteroidetes	c__Bacteroidia	o__Bacteroidales	f__Prevotellaceae	g__unclassified_f__Prevotellaceae	s__unclassified_f__Prevotellaceae	OTU124	1	0	0	0	0	0	2	0	0	1	0	8	1	2	0	0	0	0	0	0	0	2	2	14	16	0	0	1	17	0
d__Bacteria	k__norank_d__Bacteria	p__Firmicutes	c__Clostridia	o__Clostridiales	f__Lachnospiraceae	g__unclassified_f__Lachnospiraceae	s__unclassified_f__Lachnospiraceae	OTU175	14	22	8	3	19	0	0	18	0	1	3	2	2	2	1	2	4	0	1	4	0	4	5	13	1	2	1	9	3	4
d__Bacteria	k__norank_d__Bacteria	p__Firmicutes	c__Clostridia	o__Clostridiales	f__Ruminococcaceae	g__Ruminiclostridium_9	s__Clostridiales_bacterium_CIEAF_026	OTU78	0	0	0	0	0	0	0	0	0	0	1	0	0	1	0	2	0	0	0	1	0	0	7	28	22	0	0	0	0	0
d__Bacteria	k__norank_d__Bacteria	p__Tenericutes	c__Mollicutes	o__Mollicutes_RF39	f__norank_o__Mollicutes_RF39	g__norank_f__norank_o__Mollicutes_RF39	s__unclassified_g__norank_f__norank_o__Mollicutes_RF39	OTU789	16	0	3	0	10	2	0	0	5	0	4	1	4	4	2	5	2	8	7	8	1	1	4	2	0	2	6	0	0	1
d__Bacteria	k__norank_d__Bacteria	p__Tenericutes	c__Mollicutes	o__Mollicutes_RF39	f__norank_o__Mollicutes_RF39	g__norank_f__norank_o__Mollicutes_RF39	s__uncultured_bacterium_g__norank_f__norank_o__Mollicutes_RF39	OTU1102	1	26	4	6	0	36	16	0	28	4	4	4	2	3	2	2	4	3	10	1	5	1	1	1	0	6	7	3	1	2
d__Bacteria	k__norank_d__Bacteria	p__Bacteroidetes	c__Bacteroidia	o__Bacteroidales	f__Muribaculaceae	g__norank_f__Muribaculaceae	s__uncultured_bacterium_g__norank_f__Muribaculaceae	OTU419	0	1	0	2	0	0	0	0	0	0	2	3	1	0	2	1	2	0	0	4	5	3	7	3	2	1	2	3	3	17
d__Bacteria	k__norank_d__Bacteria	p__Firmicutes	c__Clostridia	o__Clostridiales	f__Lachnospiraceae	g__norank_f__Lachnospiraceae	s__unclassified_g__norank_f__Lachnospiraceae	OTU382	307	294	54	149	111	14	209	442	10	197	0	2	1	1	7	0	0	0	1	1	2	22	13	1	4	3	0	1	2	0
d__Bacteria	k__norank_d__Bacteria	p__Firmicutes	c__Clostridia	o__Clostridiales	f__Lachnospiraceae	g__Lachnospiraceae_FCS020_group	s__mouse_gut_metagenome_g__Lachnospiraceae_FCS020_group	OTU289	0	0	0	0	0	0	0	0	0	0	0	4	1	0	0	0	0	0	0	3	3	11	1	0	0	7	17	1	3	8
d__Bacteria	k__norank_d__Bacteria	p__Firmicutes	c__Clostridia	o__Clostridiales	f__Clostridiales_vadinBB60_group	g__norank_f__Clostridiales_vadinBB60_group	s__uncultured_bacterium_g__norank_f__Clostridiales_vadinBB60_group	OTU497	7	1	9	0	8	19	24	12	4	8	13	5	1	2	3	1	3	22	0	4	0	0	0	0	0	2	0	1	0	2
d__Bacteria	k__norank_d__Bacteria	p__Firmicutes	c__Clostridia	o__Clostridiales	f__Lachnospiraceae	g__Lachnospiraceae_UCG-010	s__uncultured_bacterium_g__Lachnospiraceae_UCG-010	OTU782	0	0	4	0	1	0	0	1	0	0	0	0	1	1	3	1	2	1	0	2	0	4	13	5	6	5	4	6	2	3
d__Bacteria	k__norank_d__Bacteria	p__Firmicutes	c__Clostridia	o__Clostridiales	f__Ruminococcaceae	g__Oscillibacter	s__unclassified_g__Oscillibacter	OTU296	18	1	12	1	15	6	1710	2745	21	1171	0	5	3	1	1	0	0	3	0	1	1	8	12	3	2	6	8	2	1	2
d__Bacteria	k__norank_d__Bacteria	p__Firmicutes	c__Clostridia	o__Clostridiales	f__Ruminococcaceae	g__Ruminococcaceae_UCG-013	s__unclassified_g__Ruminococcaceae_UCG-013	OTU1069	108	3	85	43	31	3	17	123	3	8	3	6	3	3	10	5	8	5	1	12	0	2	0	0	0	0	0	0	0	0
d__Bacteria	k__norank_d__Bacteria	p__Actinobacteria	c__Actinobacteria	o__Coriobacteriales	f__Eggerthellaceae	g__Enterorhabdus	s__mouse_gut_metagenome_g__Enterorhabdus	OTU1078	0	2	0	0	0	0	1	0	2	1	10	1	8	2	3	5	2	0	4	1	2	3	0	3	0	6	1	1	1	5
d__Bacteria	k__norank_d__Bacteria	p__Bacteroidetes	c__Bacteroidia	o__Bacteroidales	f__unclassified_o__Bacteroidales	g__unclassified_o__Bacteroidales	s__unclassified_o__Bacteroidales	OTU193	1	1	2	0	0	0	1	2	6	0	2	5	7	0	1	0	1	0	0	1	3	4	12	7	6	0	0	0	8	0
d__Bacteria	k__norank_d__Bacteria	p__Firmicutes	c__Erysipelotrichia	o__Erysipelotrichales	f__Erysipelotrichaceae	g__norank_f__Erysipelotrichaceae	s__unclassified_g__norank_f__Erysipelotrichaceae	OTU336	188	217	307	228	162	182	92	116	229	43	0	7	1	1	0	1	0	0	2	1	0	2	3	3	2	1	8	1	0	23
d__Bacteria	k__norank_d__Bacteria	p__Bacteroidetes	c__Bacteroidia	o__Bacteroidales	f__Muribaculaceae	g__norank_f__Muribaculaceae	s__uncultured_Bacteroidales_bacterium_g__norank_f__Muribaculaceae	OTU687	0	0	0	0	0	0	0	0	0	0	7	0	0	0	2	1	4	6	0	19	0	2	9	1	1	0	2	0	2	0
d__Bacteria	k__norank_d__Bacteria	p__Firmicutes	c__Clostridia	o__Clostridiales	f__Lachnospiraceae	g__unclassified_f__Lachnospiraceae	s__unclassified_f__Lachnospiraceae	OTU44	0	0	0	0	0	0	0	0	0	0	0	1	3	3	1	1	2	1	2	3	1	2	3	13	5	3	2	1	2	7
d__Bacteria	k__norank_d__Bacteria	p__Bacteroidetes	c__Bacteroidia	o__Bacteroidales	f__Muribaculaceae	g__norank_f__Muribaculaceae	s__uncultured_Bacteroidales_bacterium_g__norank_f__Muribaculaceae	OTU590	1	7	2	5	0	4	3	5	1	2	6	0	0	0	6	3	4	3	0	19	0	2	12	0	0	0	0	0	0	0
d__Bacteria	k__norank_d__Bacteria	p__Bacteroidetes	c__Bacteroidia	o__Bacteroidales	f__Muribaculaceae	g__norank_f__Muribaculaceae	s__uncultured_bacterium_g__norank_f__Muribaculaceae	OTU589	0	0	0	0	0	0	0	0	2	0	9	0	0	0	8	11	1	0	0	4	0	0	17	2	2	0	1	0	0	0
d__Bacteria	k__norank_d__Bacteria	p__Firmicutes	c__Clostridia	o__Clostridiales	f__Lachnospiraceae	g__A2	s__uncultured_bacterium_g__A2	OTU389	12	3	4	7	2	7	2	0	1	2	1	0	7	5	0	1	8	1	17	2	0	3	0	2	0	0	2	3	2	0
d__Bacteria	k__norank_d__Bacteria	p__Bacteroidetes	c__Bacteroidia	o__Bacteroidales	f__Muribaculaceae	g__norank_f__Muribaculaceae	s__uncultured_bacterium_g__norank_f__Muribaculaceae	OTU136	17	28	7	0	3	34	0	0	0	0	0	11	4	0	0	0	18	2	0	1	0	0	0	0	0	0	0	0	0	10
d__Bacteria	k__norank_d__Bacteria	p__Bacteroidetes	c__Bacteroidia	o__Bacteroidales	f__Muribaculaceae	g__norank_f__Muribaculaceae	s__uncultured_Bacteroidales_bacterium_g__norank_f__Muribaculaceae	OTU155	3	1	2	1	0	0	0	0	0	1	1	1	13	11	4	1	6	8	0	7	2	0	0	0	0	0	0	0	0	0
d__Bacteria	k__norank_d__Bacteria	p__Firmicutes	c__Clostridia	o__Clostridiales	f__Ruminococcaceae	g__Ruminiclostridium_9	s__unclassified_g__Ruminiclostridium_9	OTU1004	29	3	51	2	44	0	5	13	0	5	3	3	5	1	3	1	1	6	0	0	0	4	0	5	10	3	3	3	3	0
d__Bacteria	k__norank_d__Bacteria	p__Firmicutes	c__Clostridia	o__Clostridiales	f__Family_XIII	g__Family_XIII_AD3011_group	s__unclassified_g__Family_XIII_AD3011_group	OTU547	13	5	6	29	8	19	2	1	3	1	4	1	8	5	1	8	0	1	4	4	4	0	0	8	0	0	1	0	4	0
d__Bacteria	k__norank_d__Bacteria	p__Firmicutes	c__Clostridia	o__Clostridiales	f__Family_XIII	g__[Eubacterium]_nodatum_group	s__unclassified_g__[Eubacterium]_nodatum_group	OTU380	0	0	0	0	0	0	0	0	0	0	3	0	1	1	0	0	2	0	1	5	0	4	11	9	3	4	2	2	2	3
d__Bacteria	k__norank_d__Bacteria	p__Bacteroidetes	c__Bacteroidia	o__Bacteroidales	f__Muribaculaceae	g__norank_f__Muribaculaceae	s__unclassified_g__norank_f__Muribaculaceae	OTU149	17	15	26	22	14	0	2	4	2	7	10	1	6	9	2	4	9	5	0	7	0	0	0	0	0	0	0	0	0	0
d__Bacteria	k__norank_d__Bacteria	p__unclassified_k__norank_d__Bacteria	c__unclassified_k__norank_d__Bacteria	o__unclassified_k__norank_d__Bacteria	f__unclassified_k__norank_d__Bacteria	g__unclassified_k__norank_d__Bacteria	s__unclassified_k__norank_d__Bacteria	OTU314	0	0	0	0	0	16	8	0	0	0	1	0	0	1	0	1	2	2	1	4	23	4	0	0	0	0	0	10	2	2
d__Bacteria	k__norank_d__Bacteria	p__Bacteroidetes	c__Bacteroidia	o__Bacteroidales	f__Muribaculaceae	g__norank_f__Muribaculaceae	s__unclassified_g__norank_f__Muribaculaceae	OTU373	7	17	8	7	10	11	6	3	20	3	1	0	5	1	0	0	1	1	0	2	0	11	9	5	4	0	3	3	7	0
d__Bacteria	k__norank_d__Bacteria	p__Proteobacteria	c__Deltaproteobacteria	o__Desulfovibrionales	f__Desulfovibrionaceae	g__Desulfovibrio	s__Desulfovibrio_sp._ABHU2SB	OTU405	3	5	6	10	10	12	27	16	10	0	5	5	1	2	5	3	1	8	4	3	0	9	0	0	1	2	0	1	0	2
d__Bacteria	k__norank_d__Bacteria	p__Firmicutes	c__Clostridia	o__Clostridiales	f__Ruminococcaceae	g__Anaerotruncus	s__Anaerotruncus_sp._G32012	OTU787	1	0	0	0	0	71	2	0	0	1	3	4	5	0	3	4	2	2	0	2	1	7	6	2	0	3	3	1	0	3
d__Bacteria	k__norank_d__Bacteria	p__Firmicutes	c__Clostridia	o__Clostridiales	f__Family_XIII	g__Anaerovorax	s__uncultured_bacterium_g__Anaerovorax	OTU520	0	1	0	0	0	1	2	3	3	0	10	0	0	0	7	7	9	4	3	5	0	0	0	5	0	0	0	0	1	0
d__Bacteria	k__norank_d__Bacteria	p__Firmicutes	c__Clostridia	o__Clostridiales	f__Ruminococcaceae	g__Ruminiclostridium_9	s__Clostridiales_bacterium_CIEAF_026	OTU543	115	154	92	170	40	122	88	74	8	163	1	1	4	1	2	0	1	1	0	0	1	2	2	1	3	6	5	6	7	7
d__Bacteria	k__norank_d__Bacteria	p__Bacteroidetes	c__Bacteroidia	o__Bacteroidales	f__Muribaculaceae	g__norank_f__Muribaculaceae	s__uncultured_bacterium_g__norank_f__Muribaculaceae	OTU806	2	3	4	10	13	0	3	2	0	12	6	0	1	2	13	12	1	3	2	12	0	0	0	0	0	0	0	0	0	0
d__Bacteria	k__norank_d__Bacteria	p__Proteobacteria	c__Gammaproteobacteria	o__Pseudomonadales	f__Moraxellaceae	g__Psychrobacter	s__unclassified_g__Psychrobacter	OTU522	37	2	65	1	68	4	2	0	0	0	3	2	3	9	2	1	10	3	9	2	0	0	1	0	0	1	1	0	0	0
d__Bacteria	k__norank_d__Bacteria	p__Bacteroidetes	c__Bacteroidia	o__Bacteroidales	f__Muribaculaceae	g__norank_f__Muribaculaceae	s__uncultured_bacterium_g__norank_f__Muribaculaceae	OTU807	1	0	0	0	0	0	0	0	0	1	5	5	1	5	4	10	11	7	2	2	0	0	0	0	0	0	0	0	0	0
d__Bacteria	k__norank_d__Bacteria	p__Tenericutes	c__Mollicutes	o__Mollicutes_RF39	f__norank_o__Mollicutes_RF39	g__norank_f__norank_o__Mollicutes_RF39	s__unclassified_g__norank_f__norank_o__Mollicutes_RF39	OTU935	0	0	0	0	0	0	0	0	0	0	1	3	10	9	3	3	3	2	2	0	0	1	0	0	0	2	7	1	2	1
d__Bacteria	k__norank_d__Bacteria	p__Firmicutes	c__Clostridia	o__Clostridiales	f__Clostridiales_vadinBB60_group	g__norank_f__Clostridiales_vadinBB60_group	s__uncultured_bacterium_g__norank_f__Clostridiales_vadinBB60_group	OTU1038	0	0	0	0	0	0	0	0	0	0	0	0	0	1	3	0	4	2	7	4	0	0	0	3	10	3	0	0	0	9
d__Bacteria	k__norank_d__Bacteria	p__Bacteroidetes	c__Bacteroidia	o__Bacteroidales	f__Muribaculaceae	g__norank_f__Muribaculaceae	s__uncultured_bacterium_g__norank_f__Muribaculaceae	OTU951	17	11	17	18	5	16	25	18	2	23	2	7	4	8	0	0	0	6	0	4	0	4	5	0	3	0	1	1	4	0
d__Bacteria	k__norank_d__Bacteria	p__Bacteroidetes	c__Bacteroidia	o__Bacteroidales	f__Muribaculaceae	g__norank_f__Muribaculaceae	s__unclassified_g__norank_f__Muribaculaceae	OTU364	0	0	0	0	0	0	0	0	0	0	0	5	3	1	1	0	1	0	0	0	7	1	5	0	1	6	5	2	5	6
d__Bacteria	k__norank_d__Bacteria	p__Firmicutes	c__Clostridia	o__Clostridiales	f__Lachnospiraceae	g__Roseburia	s__uncultured_bacterium_g__Roseburia	OTU934	2	0	2	0	1	0	0	1	0	1	2	0	7	8	0	1	2	1	4	0	0	0	0	0	0	17	0	9	0	0
d__Bacteria	k__norank_d__Bacteria	p__Actinobacteria	c__Actinobacteria	o__Coriobacteriales	f__Eggerthellaceae	g__Enterorhabdus	s__uncultured_bacterium_g__Enterorhabdus	OTU437	5	16	48	1	1	0	4	0	1	35	0	2	2	6	2	2	2	4	0	3	1	4	2	6	1	2	4	1	3	1
d__Bacteria	k__norank_d__Bacteria	p__Bacteroidetes	c__Bacteroidia	o__Bacteroidales	f__Prevotellaceae	g__Prevotellaceae_UCG-001	s__unclassified_g__Prevotellaceae_UCG-001	OTU165	68	328	215	1388	34	212	535	131	64	138	7	0	4	0	0	2	3	19	0	8	5	0	0	0	0	0	0	0	0	0
d__Bacteria	k__norank_d__Bacteria	p__Firmicutes	c__Clostridia	o__Clostridiales	f__Lachnospiraceae	g__Lachnospiraceae_NK4A136_group	s__unclassified_g__Lachnospiraceae_NK4A136_group	OTU76	0	1	0	0	0	0	0	0	0	0	2	20	1	1	0	0	1	0	0	4	0	0	1	1	6	3	3	1	1	3
d__Bacteria	k__norank_d__Bacteria	p__Firmicutes	c__Clostridia	o__Clostridiales	f__Ruminococcaceae	g__Harryflintia	s__unclassified_g__Harryflintia	OTU461	14	9	17	3	18	0	0	1	0	1	2	5	3	3	0	1	2	3	4	5	0	1	3	3	1	3	1	2	4	2
d__Bacteria	k__norank_d__Bacteria	p__Firmicutes	c__Clostridia	o__Clostridiales	f__Lachnospiraceae	g__unclassified_f__Lachnospiraceae	s__unclassified_f__Lachnospiraceae	OTU26	1	0	1	2	0	0	3	1	0	1	2	4	0	0	1	1	0	4	0	0	0	5	17	0	2	2	5	0	4	0
d__Bacteria	k__norank_d__Bacteria	p__Firmicutes	c__Clostridia	o__Clostridiales	f__Clostridiales_vadinBB60_group	g__norank_f__Clostridiales_vadinBB60_group	s__unclassified_g__norank_f__Clostridiales_vadinBB60_group	OTU201	0	1	3	1	0	0	11	14	0	7	14	0	0	5	0	6	0	0	20	2	0	0	0	0	0	0	0	0	0	0
d__Bacteria	k__norank_d__Bacteria	p__Bacteroidetes	c__Bacteroidia	o__Bacteroidales	f__Muribaculaceae	g__norank_f__Muribaculaceae	s__uncultured_bacterium_g__norank_f__Muribaculaceae	OTU163	0	0	0	6	2	288	28	13	0	31	7	4	6	3	4	4	9	4	0	6	0	0	0	0	0	0	0	0	0	0
d__Bacteria	k__norank_d__Bacteria	p__Firmicutes	c__Clostridia	o__Clostridiales	f__Ruminococcaceae	g__unclassified_f__Ruminococcaceae	s__unclassified_f__Ruminococcaceae	OTU220	23	21	21	23	10	41	11	3	12	21	0	16	2	2	0	7	8	10	0	0	2	0	0	0	0	0	0	0	0	0
d__Bacteria	k__norank_d__Bacteria	p__Firmicutes	c__Clostridia	o__Clostridiales	f__Lachnospiraceae	g__unclassified_f__Lachnospiraceae	s__unclassified_f__Lachnospiraceae	OTU138	0	0	0	1	0	0	0	0	0	1	1	9	0	1	1	1	2	0	0	1	1	4	6	7	2	6	1	0	2	1
d__Bacteria	k__norank_d__Bacteria	p__Firmicutes	c__Clostridia	o__Clostridiales	f__Lachnospiraceae	g__Lachnospiraceae_NK4A136_group	s__uncultured_bacterium_g__Lachnospiraceae_NK4A136_group	OTU906	3554	2915	1404	621	2374	43	944	2747	24	895	0	0	0	1	0	0	0	0	0	0	0	0	10	9	12	1	1	1	0	0
d__Bacteria	k__norank_d__Bacteria	p__Firmicutes	c__Clostridia	o__Clostridiales	f__Ruminococcaceae	g__Ruminococcaceae_UCG-013	s__unclassified_g__Ruminococcaceae_UCG-013	OTU479	13	1	18	8	10	3	10	7	2	13	1	0	4	9	15	1	7	0	1	0	0	1	0	0	0	7	0	0	0	0
d__Bacteria	k__norank_d__Bacteria	p__Bacteroidetes	c__Bacteroidia	o__Bacteroidales	f__Muribaculaceae	g__norank_f__Muribaculaceae	s__uncultured_bacterium_g__norank_f__Muribaculaceae	OTU761	0	0	0	0	0	0	0	0	0	0	3	3	1	9	8	14	2	1	0	6	0	0	0	0	0	0	1	0	0	0
d__Bacteria	k__norank_d__Bacteria	p__Actinobacteria	c__Actinobacteria	o__Coriobacteriales	f__Eggerthellaceae	g__norank_f__Eggerthellaceae	s__uncultured_Coriobacteriales_bacterium_g__norank_f__Eggerthellaceae	OTU110	0	0	0	0	0	0	0	0	0	0	1	1	2	1	0	2	0	2	0	1	1	6	2	2	4	4	8	4	4	0
d__Bacteria	k__norank_d__Bacteria	p__Bacteroidetes	c__Bacteroidia	o__Bacteroidales	f__unclassified_o__Bacteroidales	g__unclassified_o__Bacteroidales	s__unclassified_o__Bacteroidales	OTU929	1756	1922	2270	873	1084	18	293	665	6	750	1	3	3	3	1	0	5	7	0	3	1	1	1	0	0	5	1	5	2	2
d__Bacteria	k__norank_d__Bacteria	p__Firmicutes	c__Clostridia	o__Clostridiales	f__Lachnospiraceae	g__norank_f__Lachnospiraceae	s__unclassified_g__norank_f__Lachnospiraceae	OTU855	0	2	3	1	0	1	0	0	0	0	2	3	4	2	1	2	0	0	5	1	0	1	0	0	0	5	0	11	4	3
d__Bacteria	k__norank_d__Bacteria	p__Firmicutes	c__Clostridia	o__Clostridiales	f__Lachnospiraceae	g__Tyzzerella_3	s__unclassified_g__Tyzzerella_3	OTU600	5	1	0	5	1	6	2	5	6	7	0	0	1	0	1	1	0	1	0	0	4	7	0	3	0	13	0	7	2	3
d__Bacteria	k__norank_d__Bacteria	p__Firmicutes	c__Clostridia	o__Clostridiales	f__unclassified_o__Clostridiales	g__unclassified_o__Clostridiales	s__unclassified_o__Clostridiales	OTU97	0	0	0	0	0	0	0	0	0	0	5	7	3	0	2	2	1	0	0	3	0	1	0	0	0	12	2	1	0	0
d__Bacteria	k__norank_d__Bacteria	p__Bacteroidetes	c__Bacteroidia	o__Bacteroidales	f__Prevotellaceae	g__Alloprevotella	s__unclassified_g__Alloprevotella	OTU797	0	5	0	2	0	0	4	12	3	4	3	1	3	18	0	1	9	7	0	1	0	0	0	0	0	0	0	0	0	0
d__Bacteria	k__norank_d__Bacteria	p__Firmicutes	c__Clostridia	o__Clostridiales	f__Lachnospiraceae	g__unclassified_f__Lachnospiraceae	s__unclassified_f__Lachnospiraceae	OTU1035	10	7	30	16	9	15	2	3	4	4	0	1	1	2	7	3	2	2	1	1	4	0	0	4	0	0	8	1	4	2
d__Bacteria	k__norank_d__Bacteria	p__Firmicutes	c__Clostridia	o__Clostridiales	f__Lachnospiraceae	g__ASF356	s__unclassified_g__ASF356	OTU641	0	0	0	0	0	0	0	0	0	0	3	1	4	3	0	9	2	0	1	7	1	2	0	1	4	0	0	1	3	0
d__Bacteria	k__norank_d__Bacteria	p__Bacteroidetes	c__Bacteroidia	o__Bacteroidales	f__Muribaculaceae	g__norank_f__Muribaculaceae	s__uncultured_bacterium_g__norank_f__Muribaculaceae	OTU1085	0	0	0	0	0	0	0	0	0	1	12	0	0	0	0	21	3	4	0	2	0	0	0	0	0	0	1	0	1	0
d__Bacteria	k__norank_d__Bacteria	p__Firmicutes	c__Clostridia	o__Clostridiales	f__Ruminococcaceae	g__Ruminiclostridium_9	s__uncultured_bacterium_g__Ruminiclostridium_9	OTU17	47	67	111	155	85	3	21	6	6	22	1	2	0	1	0	1	0	7	0	1	3	3	2	3	3	0	4	5	4	2
d__Bacteria	k__norank_d__Bacteria	p__Bacteroidetes	c__Bacteroidia	o__Bacteroidales	f__Muribaculaceae	g__norank_f__Muribaculaceae	s__uncultured_bacterium_g__norank_f__Muribaculaceae	OTU622	0	0	0	1	0	0	0	0	0	0	1	0	0	0	1	0	4	2	0	0	0	1	2	0	1	13	0	7	0	9
d__Bacteria	k__norank_d__Bacteria	p__Firmicutes	c__Clostridia	o__Clostridiales	f__Lachnospiraceae	g__norank_f__Lachnospiraceae	s__uncultured_bacterium_g__norank_f__Lachnospiraceae	OTU444	99	368	64	672	91	281	165	72	50	83	1	0	0	5	0	2	1	3	2	7	2	0	0	0	0	1	2	7	1	7
d__Bacteria	k__norank_d__Bacteria	p__Bacteroidetes	c__Bacteroidia	o__Bacteroidales	f__unclassified_o__Bacteroidales	g__unclassified_o__Bacteroidales	s__unclassified_o__Bacteroidales	OTU958	0	4	0	0	0	0	10	2	2	23	0	2	1	1	2	2	1	2	0	0	1	2	0	5	13	1	3	4	1	3
d__Bacteria	k__norank_d__Bacteria	p__Firmicutes	c__Erysipelotrichia	o__Erysipelotrichales	f__Erysipelotrichaceae	g__unclassified_f__Erysipelotrichaceae	s__unclassified_f__Erysipelotrichaceae	OTU527	0	0	0	0	0	0	0	0	0	0	0	0	0	0	4	1	0	0	0	0	0	0	16	3	10	2	0	0	0	5
d__Bacteria	k__norank_d__Bacteria	p__Bacteroidetes	c__Bacteroidia	o__Bacteroidales	f__Muribaculaceae	g__norank_f__Muribaculaceae	s__uncultured_Bacteroidales_bacterium_g__norank_f__Muribaculaceae	OTU990	1	0	0	0	0	0	0	0	0	0	11	1	0	0	2	3	0	1	0	9	0	0	7	4	2	0	0	1	0	0
d__Bacteria	k__norank_d__Bacteria	p__Actinobacteria	c__Actinobacteria	o__Coriobacteriales	f__Eggerthellaceae	g__Enterorhabdus	s__uncultured_bacterium_g__Enterorhabdus	OTU521	0	9	0	0	1	2	1	0	2	0	14	1	0	1	5	5	2	5	2	2	0	1	0	0	0	0	0	0	3	0
d__Bacteria	k__norank_d__Bacteria	p__Firmicutes	c__Clostridia	o__Clostridiales	f__Clostridiales_vadinBB60_group	g__norank_f__Clostridiales_vadinBB60_group	s__uncultured_bacterium_g__norank_f__Clostridiales_vadinBB60_group	OTU631	0	0	0	0	0	0	0	0	0	1	0	0	0	0	0	0	0	0	0	0	0	6	2	0	17	9	0	1	0	5
d__Bacteria	k__norank_d__Bacteria	p__Firmicutes	c__Clostridia	o__Clostridiales	f__unclassified_o__Clostridiales	g__unclassified_o__Clostridiales	s__unclassified_o__Clostridiales	OTU485	57	12	30	11	52	22	76	152	154	180	0	0	6	5	4	0	1	0	0	2	10	4	0	0	0	0	0	1	6	0
d__Bacteria	k__norank_d__Bacteria	p__Firmicutes	c__Clostridia	o__Clostridiales	f__Lachnospiraceae	g__unclassified_f__Lachnospiraceae	s__unclassified_f__Lachnospiraceae	OTU101	42	47	39	13	11	1	7	11	1	3	0	1	0	1	0	0	0	0	0	0	8	5	0	0	0	16	2	5	0	1
d__Bacteria	k__norank_d__Bacteria	p__Firmicutes	c__Clostridia	o__Clostridiales	f__Lachnospiraceae	g__unclassified_f__Lachnospiraceae	s__unclassified_f__Lachnospiraceae	OTU867	136	22	252	29	195	21	53	27	62	7	7	0	0	1	0	0	1	1	21	0	2	0	0	0	0	0	0	6	0	0
d__Bacteria	k__norank_d__Bacteria	p__Bacteroidetes	c__Bacteroidia	o__Bacteroidales	f__Muribaculaceae	g__norank_f__Muribaculaceae	s__unclassified_g__norank_f__Muribaculaceae	OTU1025	0	2	0	0	0	0	2	2	1	3	4	0	0	0	18	6	3	4	0	4	0	0	0	0	0	0	0	0	0	0
d__Bacteria	k__norank_d__Bacteria	p__Bacteroidetes	c__Bacteroidia	o__Bacteroidales	f__Muribaculaceae	g__norank_f__Muribaculaceae	s__unclassified_g__norank_f__Muribaculaceae	OTU595	3	0	0	0	6	0	0	3	0	1	0	0	0	1	0	0	0	0	0	0	0	9	1	7	12	2	1	0	3	3
d__Bacteria	k__norank_d__Bacteria	p__Firmicutes	c__Clostridia	o__Clostridiales	f__Lachnospiraceae	g__Blautia	s__Lachnospiraceae_bacterium_DW59	OTU72	0	0	1	0	1	0	0	0	0	0	1	3	0	0	0	0	1	0	0	2	1	2	0	0	0	0	23	0	0	5
d__Bacteria	k__norank_d__Bacteria	p__Firmicutes	c__Clostridia	o__Clostridiales	f__Ruminococcaceae	g__Ruminococcaceae_UCG-014	s__unclassified_g__Ruminococcaceae_UCG-014	OTU384	2	3	1	1	2	1	5	2	2	3	0	0	2	2	0	2	0	1	1	1	7	0	2	2	1	7	4	4	1	1
d__Bacteria	k__norank_d__Bacteria	p__Bacteroidetes	c__Bacteroidia	o__Bacteroidales	f__Muribaculaceae	g__norank_f__Muribaculaceae	s__unclassified_g__norank_f__Muribaculaceae	OTU1042	9	0	5	0	8	0	0	0	0	0	0	0	0	0	0	2	0	0	0	0	0	0	12	14	7	0	3	0	0	0
d__Bacteria	k__norank_d__Bacteria	p__Firmicutes	c__Erysipelotrichia	o__Erysipelotrichales	f__Erysipelotrichaceae	g__Faecalibaculum	s__uncultured_bacterium_g__Faecalibaculum	OTU519	272	167	290	111	247	23	17	82	16	56	1	1	0	0	3	3	2	3	2	0	1	0	5	7	0	1	4	0	4	0
d__Bacteria	k__norank_d__Bacteria	p__Bacteroidetes	c__Bacteroidia	o__Bacteroidales	f__Bacteroidaceae	g__Bacteroides	s__unclassified_g__Bacteroides	OTU555	211	9	129	3	126	0	11	183	0	3	6	1	3	4	4	5	4	5	1	4	0	0	0	0	0	0	0	0	0	0
d__Bacteria	k__norank_d__Bacteria	p__Bacteroidetes	c__Bacteroidia	o__Bacteroidales	f__Muribaculaceae	g__norank_f__Muribaculaceae	s__unclassified_g__norank_f__Muribaculaceae	OTU845	0	68	3	228	6	43	13	0	54	6	17	3	0	0	0	7	1	1	7	3	0	0	0	0	0	0	0	0	0	0
d__Bacteria	k__norank_d__Bacteria	p__Bacteroidetes	c__Bacteroidia	o__Bacteroidales	f__Tannerellaceae	g__Parabacteroides	s__unclassified_g__Parabacteroides	OTU489	0	0	0	1	0	0	0	0	0	0	2	8	5	2	3	5	4	5	0	3	0	0	0	0	0	0	0	0	0	0
d__Bacteria	k__norank_d__Bacteria	p__Bacteroidetes	c__Bacteroidia	o__Bacteroidales	f__Muribaculaceae	g__norank_f__Muribaculaceae	s__uncultured_bacterium_g__norank_f__Muribaculaceae	OTU150	8	16	10	20	0	17	13	14	0	19	5	5	2	10	2	3	6	2	0	2	0	0	0	0	0	0	0	0	0	0
d__Bacteria	k__norank_d__Bacteria	p__Firmicutes	c__Clostridia	o__Clostridiales	f__Lachnospiraceae	g__Lachnospiraceae_NK4A136_group	s__Lachnospiraceae_bacterium_A4	OTU785	1	1	29	0	0	9	5	10	3	0	0	5	4	1	0	4	2	1	0	5	2	3	0	1	0	5	0	5	1	5
d__Bacteria	k__norank_d__Bacteria	p__Proteobacteria	c__Alphaproteobacteria	o__Rhizobiales	f__Rhizobiaceae	g__Mesorhizobium	s__Mesorhizobium_plurifarium	OTU241	0	4	2	2	0	0	0	0	0	6	0	0	2	4	5	0	10	3	12	0	0	0	0	0	0	0	0	0	0	0
d__Bacteria	k__norank_d__Bacteria	p__Firmicutes	c__Clostridia	o__Clostridiales	f__Ruminococcaceae	g__Ruminococcaceae_UCG-014	s__unclassified_g__Ruminococcaceae_UCG-014	OTU628	13	6	21	21	7	7	2	1	30	1	1	0	0	0	2	11	2	4	4	3	2	1	0	1	1	1	1	0	2	0
d__Bacteria	k__norank_d__Bacteria	p__Bacteroidetes	c__Bacteroidia	o__Bacteroidales	f__Muribaculaceae	g__norank_f__Muribaculaceae	s__uncultured_Bacteroidales_bacterium_g__norank_f__Muribaculaceae	OTU530	0	0	0	0	0	0	1	0	0	0	9	0	0	0	4	4	4	0	0	8	1	0	4	1	0	0	0	0	0	0
d__Bacteria	k__norank_d__Bacteria	p__Bacteroidetes	c__Bacteroidia	o__Bacteroidales	f__unclassified_o__Bacteroidales	g__unclassified_o__Bacteroidales	s__unclassified_o__Bacteroidales	OTU362	1	0	2	0	0	1	2	0	5	0	1	2	1	0	2	3	2	9	0	3	4	1	3	0	0	0	1	1	2	0
d__Bacteria	k__norank_d__Bacteria	p__Firmicutes	c__Clostridia	o__Clostridiales	f__Ruminococcaceae	g__Ruminococcaceae_UCG-013	s__unclassified_g__Ruminococcaceae_UCG-013	OTU726	0	0	0	0	0	0	0	0	0	0	0	0	0	0	6	0	0	0	0	1	1	0	0	0	0	19	0	0	2	6
d__Bacteria	k__norank_d__Bacteria	p__Firmicutes	c__Clostridia	o__Clostridiales	f__Ruminococcaceae	g__unclassified_f__Ruminococcaceae	s__unclassified_f__Ruminococcaceae	OTU568	0	0	1	0	0	0	0	0	0	0	1	6	5	2	1	0	3	3	0	1	1	5	2	0	0	3	0	0	1	1
d__Bacteria	k__norank_d__Bacteria	p__Firmicutes	c__Clostridia	o__Clostridiales	f__Lachnospiraceae	g__unclassified_f__Lachnospiraceae	s__unclassified_f__Lachnospiraceae	OTU668	0	0	0	0	0	0	0	0	0	0	0	1	0	1	0	2	0	0	0	0	0	0	12	13	5	0	0	0	0	0
d__Bacteria	k__norank_d__Bacteria	p__Bacteroidetes	c__Bacteroidia	o__Bacteroidales	f__unclassified_o__Bacteroidales	g__unclassified_o__Bacteroidales	s__unclassified_o__Bacteroidales	OTU776	1	0	0	0	0	0	1	0	0	0	0	14	1	9	1	2	2	3	0	2	0	0	0	0	0	0	0	0	0	0
d__Bacteria	k__norank_d__Bacteria	p__Proteobacteria	c__Gammaproteobacteria	o__Betaproteobacteriales	f__Burkholderiaceae	g__Paenalcaligenes	s__unclassified_g__Paenalcaligenes	OTU1108	0	0	0	0	0	0	0	0	0	0	1	4	0	8	3	5	7	2	3	1	0	0	0	0	0	0	0	0	0	0
d__Bacteria	k__norank_d__Bacteria	p__Firmicutes	c__Clostridia	o__Clostridiales	f__Lachnospiraceae	g__Marvinbryantia	s__unclassified_g__Marvinbryantia	OTU473	0	0	0	0	0	0	0	0	0	0	0	0	0	5	5	1	5	0	1	1	0	1	3	5	0	3	0	1	1	2
d__Bacteria	k__norank_d__Bacteria	p__Bacteroidetes	c__Bacteroidia	o__Bacteroidales	f__Muribaculaceae	g__norank_f__Muribaculaceae	s__uncultured_bacterium_g__norank_f__Muribaculaceae	OTU200	8	2	2	0	5	0	1	2	0	0	9	3	2	2	2	6	2	6	0	2	0	0	0	0	0	0	0	0	0	0
d__Bacteria	k__norank_d__Bacteria	p__Bacteroidetes	c__Bacteroidia	o__Bacteroidales	f__Muribaculaceae	g__norank_f__Muribaculaceae	s__unclassified_g__norank_f__Muribaculaceae	OTU54	0	0	0	0	0	0	0	0	0	0	3	0	2	1	1	2	2	4	0	1	1	1	4	4	1	0	4	0	2	0
d__Bacteria	k__norank_d__Bacteria	p__Firmicutes	c__Clostridia	o__Clostridiales	f__Ruminococcaceae	g__norank_f__Ruminococcaceae	s__uncultured_bacterium_g__norank_f__Ruminococcaceae	OTU635	39	58	20	14	9	3	14	116	2	33	0	0	1	2	11	0	1	5	1	3	0	1	0	5	2	0	0	0	1	0
d__Bacteria	k__norank_d__Bacteria	p__Actinobacteria	c__Actinobacteria	o__Coriobacteriales	f__Atopobiaceae	g__Coriobacteriaceae_UCG-002	s__uncultured_bacterium_g__Coriobacteriaceae_UCG-002	OTU250	0	0	0	0	0	0	0	2	0	0	11	1	0	0	1	5	2	5	3	5	0	0	0	0	0	0	0	0	0	0
d__Bacteria	k__norank_d__Bacteria	p__Firmicutes	c__Clostridia	o__Clostridiales	f__Lachnospiraceae	g__GCA-900066575	s__uncultured_bacterium_g__GCA-900066575	OTU496	4	11	2	0	1	0	0	0	0	0	2	5	1	2	3	1	2	0	2	3	0	3	2	0	1	1	1	2	0	2
d__Bacteria	k__norank_d__Bacteria	p__Firmicutes	c__Bacilli	o__Bacillales	f__Staphylococcaceae	g__Staphylococcus	s__Staphylococcus_lentus_g__Staphylococcus	OTU147	47	0	93	5	2	113	93	641	574	832	0	5	0	4	2	2	6	8	1	0	1	0	0	0	0	0	0	1	0	0
d__Bacteria	k__norank_d__Bacteria	p__Tenericutes	c__Mollicutes	o__Mollicutes_RF39	f__norank_o__Mollicutes_RF39	g__norank_f__norank_o__Mollicutes_RF39	s__unclassified_g__norank_f__norank_o__Mollicutes_RF39	OTU967	3	12	1	1	0	0	0	3	1	0	0	0	2	2	12	2	0	1	0	2	1	2	0	0	0	0	5	0	2	1
d__Bacteria	k__norank_d__Bacteria	p__Firmicutes	c__Clostridia	o__Clostridiales	f__Lachnospiraceae	g__unclassified_f__Lachnospiraceae	s__unclassified_f__Lachnospiraceae	OTU627	0	0	0	0	0	0	0	0	0	0	0	0	0	2	0	1	2	1	0	0	0	6	4	0	0	2	10	1	0	3
d__Bacteria	k__norank_d__Bacteria	p__Firmicutes	c__Clostridia	o__Clostridiales	f__unclassified_o__Clostridiales	g__unclassified_o__Clostridiales	s__unclassified_o__Clostridiales	OTU976	2	2	1	5	3	6	6	7	7	1	1	9	1	2	0	0	0	0	0	1	0	2	0	1	0	0	6	3	6	0
d__Bacteria	k__norank_d__Bacteria	p__Bacteroidetes	c__Bacteroidia	o__Bacteroidales	f__Muribaculaceae	g__norank_f__Muribaculaceae	s__uncultured_bacterium_g__norank_f__Muribaculaceae	OTU399	45	26	42	15	10	13	2	6	7	2	0	1	0	0	0	0	0	0	0	0	5	0	4	0	1	0	0	15	6	0
d__Bacteria	k__norank_d__Bacteria	p__Cyanobacteria	c__Melainabacteria	o__Gastranaerophilales	f__norank_o__Gastranaerophilales	g__norank_f__norank_o__Gastranaerophilales	s__uncultured_bacterium_g__norank_f__norank_o__Gastranaerophilales	OTU141	43	48	22	70	22	224	138	65	256	77	4	11	4	3	0	3	3	0	1	2	0	0	0	0	0	0	0	0	0	0
d__Bacteria	k__norank_d__Bacteria	p__Firmicutes	c__Clostridia	o__Clostridiales	f__Ruminococcaceae	g__Ruminococcaceae_UCG-013	s__unclassified_g__Ruminococcaceae_UCG-013	OTU647	1	4166	109	666	9	374	6354	665	2368	5114	3	1	0	0	0	4	0	4	0	0	1	1	1	4	0	3	9	0	0	0
d__Bacteria	k__norank_d__Bacteria	p__Firmicutes	c__Clostridia	o__Clostridiales	f__Ruminococcaceae	g__Ruminococcaceae_UCG-013	s__unclassified_g__Ruminococcaceae_UCG-013	OTU179	0	2	1	0	0	2	0	0	0	0	3	0	1	1	1	0	3	1	0	0	6	2	2	1	0	1	3	0	4	2
d__Bacteria	k__norank_d__Bacteria	p__unclassified_k__norank_d__Bacteria	c__unclassified_k__norank_d__Bacteria	o__unclassified_k__norank_d__Bacteria	f__unclassified_k__norank_d__Bacteria	g__unclassified_k__norank_d__Bacteria	s__unclassified_k__norank_d__Bacteria	OTU371	0	0	0	1	0	7	8	1	1	1	0	0	2	0	1	1	3	4	0	0	2	0	0	3	1	3	4	2	3	2
d__Bacteria	k__norank_d__Bacteria	p__unclassified_k__norank_d__Bacteria	c__unclassified_k__norank_d__Bacteria	o__unclassified_k__norank_d__Bacteria	f__unclassified_k__norank_d__Bacteria	g__unclassified_k__norank_d__Bacteria	s__unclassified_k__norank_d__Bacteria	OTU93	11	8	15	10	12	0	3	39	1	2	3	1	1	2	0	2	2	0	0	1	1	1	0	0	0	15	0	1	0	0
d__Bacteria	k__norank_d__Bacteria	p__Proteobacteria	c__Deltaproteobacteria	o__Desulfovibrionales	f__Desulfovibrionaceae	g__Desulfovibrio	s__uncultured_bacterium_g__Desulfovibrio	OTU16	8	2	1	6	0	0	0	1	0	0	0	2	0	1	4	3	1	2	0	3	2	1	5	2	0	2	1	1	0	0
d__Bacteria	k__norank_d__Bacteria	p__Firmicutes	c__Clostridia	o__Clostridiales	f__Lachnospiraceae	g__Lachnospiraceae_NK4A136_group	s__Lachnospiraceae_bacterium_COE1	OTU85	0	0	8	13	1	155	30	8	0	0	2	0	1	0	0	0	3	2	0	0	0	11	0	2	0	8	1	0	0	0
d__Bacteria	k__norank_d__Bacteria	p__Firmicutes	c__Clostridia	o__Clostridiales	f__Lachnospiraceae	g__unclassified_f__Lachnospiraceae	s__unclassified_f__Lachnospiraceae	OTU511	18	4	32	21	6	9	16	3	29	2	1	8	0	0	3	0	4	1	0	0	0	2	0	0	0	8	0	2	0	1
d__Bacteria	k__norank_d__Bacteria	p__Firmicutes	c__Clostridia	o__Clostridiales	f__Lachnospiraceae	g__unclassified_f__Lachnospiraceae	s__unclassified_f__Lachnospiraceae	OTU442	18	92	6	641	11	3	78	4	254	13	0	1	0	4	2	0	4	0	3	2	6	0	0	2	0	0	1	1	4	0
d__Bacteria	k__norank_d__Bacteria	p__Firmicutes	c__Clostridia	o__Clostridiales	f__Lachnospiraceae	g__unclassified_f__Lachnospiraceae	s__unclassified_f__Lachnospiraceae	OTU509	44	37	13	15	20	15	4	3	6	4	0	2	1	1	0	1	1	2	3	6	0	1	0	0	0	0	3	3	6	0
d__Bacteria	k__norank_d__Bacteria	p__Firmicutes	c__Clostridia	o__Clostridiales	f__Ruminococcaceae	g__Ruminococcaceae_UCG-014	s__unclassified_g__Ruminococcaceae_UCG-014	OTU749	0	0	0	0	0	0	0	0	0	0	0	0	0	1	0	1	4	0	0	1	2	0	0	2	0	0	1	0	3	15
d__Bacteria	k__norank_d__Bacteria	p__Bacteroidetes	c__Bacteroidia	o__Bacteroidales	f__Muribaculaceae	g__norank_f__Muribaculaceae	s__unclassified_g__norank_f__Muribaculaceae	OTU390	0	0	2	2	0	3	1	0	2	0	0	0	4	1	1	0	1	0	0	0	11	0	2	0	0	0	2	4	0	4
d__Bacteria	k__norank_d__Bacteria	p__Firmicutes	c__Clostridia	o__Clostridiales	f__Clostridiales_vadinBB60_group	g__norank_f__Clostridiales_vadinBB60_group	s__uncultured_bacterium_g__norank_f__Clostridiales_vadinBB60_group	OTU984	0	0	0	0	0	0	0	0	0	0	2	2	1	1	1	2	1	4	3	2	0	3	1	1	4	0	0	0	2	0
d__Bacteria	k__norank_d__Bacteria	p__Firmicutes	c__Clostridia	o__Clostridiales	f__Lachnospiraceae	g__Acetatifactor	s__uncultured_bacterium_g__Acetatifactor	OTU174	87	17	133	3	72	0	16	36	0	23	2	1	1	1	3	5	10	1	1	1	0	0	0	0	1	0	1	1	0	0
d__Bacteria	k__norank_d__Bacteria	p__Firmicutes	c__Clostridia	o__Clostridiales	f__Clostridiales_vadinBB60_group	g__norank_f__Clostridiales_vadinBB60_group	s__uncultured_bacterium_g__norank_f__Clostridiales_vadinBB60_group	OTU215	2	6	2	8	4	4	4	4	0	1	3	2	1	3	1	0	2	16	1	0	0	0	0	0	0	0	0	0	0	0
d__Bacteria	k__norank_d__Bacteria	p__Firmicutes	c__Clostridia	o__Clostridiales	f__Clostridiales_vadinBB60_group	g__norank_f__Clostridiales_vadinBB60_group	s__unclassified_g__norank_f__Clostridiales_vadinBB60_group	OTU529	5	11	30	2	7	33	34	10	9	3	0	1	2	1	2	0	2	0	8	1	0	1	1	4	1	0	1	2	0	2
d__Bacteria	k__norank_d__Bacteria	p__Firmicutes	c__Clostridia	o__Clostridiales	f__unclassified_o__Clostridiales	g__unclassified_o__Clostridiales	s__unclassified_o__Clostridiales	OTU25	1	1	0	0	1	0	0	0	0	0	0	6	0	1	0	0	1	0	0	2	0	2	4	2	3	1	2	1	1	3
d__Bacteria	k__norank_d__Bacteria	p__Bacteroidetes	c__Bacteroidia	o__Bacteroidales	f__Tannerellaceae	g__Parabacteroides	s__unclassified_g__Parabacteroides	OTU183	3	2	4	0	3	0	0	1	0	0	10	0	0	0	6	6	0	3	0	4	0	0	0	0	0	0	0	0	0	0
d__Bacteria	k__norank_d__Bacteria	p__Bacteroidetes	c__Bacteroidia	o__Bacteroidales	f__Bacteroidaceae	g__Bacteroides	s__Bacteroides_uniformis	OTU343	0	0	0	1	1	1	0	0	0	1	2	2	1	0	3	2	4	0	1	4	0	0	0	3	0	1	1	3	1	1
d__Bacteria	k__norank_d__Bacteria	p__Bacteroidetes	c__Bacteroidia	o__Bacteroidales	f__unclassified_o__Bacteroidales	g__unclassified_o__Bacteroidales	s__unclassified_o__Bacteroidales	OTU196	20	24	4	10	6	0	5	9	0	22	1	0	0	0	2	1	2	0	0	1	3	3	2	1	2	1	1	5	2	2
d__Bacteria	k__norank_d__Bacteria	p__Firmicutes	c__Clostridia	o__Clostridiales	f__Ruminococcaceae	g__norank_f__Ruminococcaceae	s__unclassified_g__norank_f__Ruminococcaceae	OTU846	4	49	20	20	6	26	13	12	1	9	1	1	1	0	0	0	2	4	1	0	0	2	0	4	1	5	0	3	1	3
d__Bacteria	k__norank_d__Bacteria	p__Firmicutes	c__Clostridia	o__Clostridiales	f__Lachnospiraceae	g__Lachnospiraceae_NK4A136_group	s__uncultured_bacterium_g__Lachnospiraceae_NK4A136_group	OTU24	0	1	5	0	2	0	0	1	0	0	0	2	0	1	0	2	1	2	0	0	0	2	14	0	2	0	2	1	0	0
d__Bacteria	k__norank_d__Bacteria	p__Firmicutes	c__Clostridia	o__Clostridiales	f__Ruminococcaceae	g__Ruminiclostridium_5	s__Ruminiclostridium_sp._KB18	OTU370	19	15	13	9	9	18	19	12	5	4	1	2	1	0	0	0	0	0	0	0	0	4	1	1	0	2	10	1	4	1
d__Bacteria	k__norank_d__Bacteria	p__Firmicutes	c__Clostridia	o__Clostridiales	f__Lachnospiraceae	g__Roseburia	s__unclassified_g__Roseburia	OTU553	22	63	9	74	4	93	110	54	99	86	0	0	0	3	0	0	1	0	0	0	0	0	0	0	0	16	0	8	0	0
d__Bacteria	k__norank_d__Bacteria	p__Firmicutes	c__Clostridia	o__Clostridiales	f__Clostridiales_vadinBB60_group	g__norank_f__Clostridiales_vadinBB60_group	s__uncultured_bacterium_g__norank_f__Clostridiales_vadinBB60_group	OTU189	25	53	84	93	27	76	40	30	86	11	3	0	1	3	3	1	1	3	5	1	1	1	0	3	1	0	0	0	0	0
d__Bacteria	k__norank_d__Bacteria	p__Bacteroidetes	c__Bacteroidia	o__Bacteroidales	f__unclassified_o__Bacteroidales	g__unclassified_o__Bacteroidales	s__unclassified_o__Bacteroidales	OTU413	0	1	43	60	1	0	11	0	10	0	4	3	0	1	2	0	0	3	0	5	1	1	0	0	1	0	1	2	1	2
d__Bacteria	k__norank_d__Bacteria	p__Elusimicrobia	c__Elusimicrobia	o__Lineage_IV	f__norank_o__Lineage_IV	g__norank_f__norank_o__Lineage_IV	s__uncultured_bacterium_g__norank_f__norank_o__Lineage_IV	OTU247	0	0	0	0	0	0	0	0	0	0	0	0	0	0	0	0	0	0	27	0	0	0	0	0	0	0	0	0	0	0
d__Bacteria	k__norank_d__Bacteria	p__Firmicutes	c__Clostridia	o__Clostridiales	f__Lachnospiraceae	g__Lachnospiraceae_UCG-006	s__unclassified_g__Lachnospiraceae_UCG-006	OTU925	12	1	0	0	6	0	0	0	1	0	0	1	0	2	0	0	1	0	0	1	0	0	9	5	8	0	0	0	0	0
d__Bacteria	k__norank_d__Bacteria	p__Bacteroidetes	c__Bacteroidia	o__Bacteroidales	f__Muribaculaceae	g__norank_f__Muribaculaceae	s__uncultured_bacterium_g__norank_f__Muribaculaceae	OTU848	0	0	0	0	0	0	0	0	0	0	9	3	1	1	0	9	2	0	0	1	0	0	0	0	0	0	1	0	0	0
d__Bacteria	k__norank_d__Bacteria	p__unclassified_k__norank_d__Bacteria	c__unclassified_k__norank_d__Bacteria	o__unclassified_k__norank_d__Bacteria	f__unclassified_k__norank_d__Bacteria	g__unclassified_k__norank_d__Bacteria	s__unclassified_k__norank_d__Bacteria	OTU923	0	0	0	0	2	7	7	3	2	0	0	6	0	0	0	0	2	0	0	0	0	1	6	3	6	0	2	1	0	0
d__Bacteria	k__norank_d__Bacteria	p__Bacteroidetes	c__Bacteroidia	o__Bacteroidales	f__Muribaculaceae	g__norank_f__Muribaculaceae	s__uncultured_Bacteroidales_bacterium_g__norank_f__Muribaculaceae	OTU587	28	0	21	1	16	0	1	11	0	1	4	0	0	0	1	5	0	0	0	8	0	0	2	0	3	1	1	0	0	1
d__Bacteria	k__norank_d__Bacteria	p__Bacteroidetes	c__Bacteroidia	o__Bacteroidales	f__Muribaculaceae	g__norank_f__Muribaculaceae	s__unclassified_g__norank_f__Muribaculaceae	OTU616	16	1	9	2	3	2	7	5	3	4	0	0	2	0	1	1	0	2	0	0	0	1	0	0	2	1	6	7	2	1
d__Bacteria	k__norank_d__Bacteria	p__Tenericutes	c__Mollicutes	o__Mollicutes_RF39	f__norank_o__Mollicutes_RF39	g__norank_f__norank_o__Mollicutes_RF39	s__unclassified_g__norank_f__norank_o__Mollicutes_RF39	OTU252	6	3	4	178	5	8	38	35	3	18	3	0	1	1	2	0	2	1	8	1	0	2	0	0	0	0	1	0	2	2
d__Bacteria	k__norank_d__Bacteria	p__Firmicutes	c__Clostridia	o__Clostridiales	f__Ruminococcaceae	g__UBA1819	s__uncultured_organism_g__UBA1819	OTU507	31	20	17	14	73	1	15	40	1	1	0	1	0	3	1	0	1	1	2	1	0	4	3	6	0	0	0	0	2	1
d__Bacteria	k__norank_d__Bacteria	p__Firmicutes	c__Clostridia	o__Clostridiales	f__Lachnospiraceae	g__Lachnospiraceae_FCS020_group	s__uncultured_bacterium_g__Lachnospiraceae_FCS020_group	OTU3	1047	156	841	103	1065	860	399	677	322	411	1	0	2	1	0	0	1	1	0	1	3	4	1	0	0	2	4	3	2	0
d__Bacteria	k__norank_d__Bacteria	p__Tenericutes	c__Mollicutes	o__Mollicutes_RF39	f__norank_o__Mollicutes_RF39	g__norank_f__norank_o__Mollicutes_RF39	s__uncultured_bacterium_g__norank_f__norank_o__Mollicutes_RF39	OTU771	0	1	0	0	0	0	0	0	0	0	0	0	0	0	0	1	0	0	0	0	1	0	3	0	0	0	7	0	14	0
d__Bacteria	k__norank_d__Bacteria	p__Bacteroidetes	c__Bacteroidia	o__Bacteroidales	f__Muribaculaceae	g__norank_f__Muribaculaceae	s__uncultured_bacterium_g__norank_f__Muribaculaceae	OTU339	1	3	0	3	0	0	2	10	2	0	0	0	1	3	2	0	0	0	0	0	3	2	5	0	1	1	3	1	1	3
d__Bacteria	k__norank_d__Bacteria	p__Tenericutes	c__Mollicutes	o__Mollicutes_RF39	f__norank_o__Mollicutes_RF39	g__norank_f__norank_o__Mollicutes_RF39	s__uncultured_bacterium_g__norank_f__norank_o__Mollicutes_RF39	OTU450	2	3	1	2	0	0	1	0	0	0	0	0	0	0	1	1	4	2	12	0	0	0	0	0	0	2	3	1	0	0
d__Bacteria	k__norank_d__Bacteria	p__Firmicutes	c__Clostridia	o__Clostridiales	f__Lachnospiraceae	g__Blautia	s__unclassified_g__Blautia	OTU422	0	0	0	0	0	0	0	0	0	0	1	0	2	1	15	4	2	1	0	0	0	0	0	0	0	0	0	0	0	0
d__Bacteria	k__norank_d__Bacteria	p__Proteobacteria	c__Alphaproteobacteria	o__Rhodospirillales	f__norank_o__Rhodospirillales	g__norank_f__norank_o__Rhodospirillales	s__unclassified_g__norank_f__norank_o__Rhodospirillales	OTU727	5	4	13	1	1	2	9	3	4	0	0	0	0	0	0	0	0	0	0	0	1	2	0	5	5	0	11	0	0	2
d__Bacteria	k__norank_d__Bacteria	p__Bacteroidetes	c__Bacteroidia	o__Bacteroidales	f__Tannerellaceae	g__Parabacteroides	s__unclassified_g__Parabacteroides	OTU328	5	6	6	2	1	5	7	6	5	2	0	0	0	1	1	0	0	0	0	3	3	2	3	1	1	0	1	2	1	6
d__Bacteria	k__norank_d__Bacteria	p__Firmicutes	c__Clostridia	o__Clostridiales	f__Ruminococcaceae	g__Ruminococcaceae_UCG-010	s__unclassified_g__Ruminococcaceae_UCG-010	OTU492	0	2	2	0	0	0	0	0	0	0	6	1	2	4	0	0	1	1	3	0	0	0	3	1	0	1	1	0	1	0
d__Bacteria	k__norank_d__Bacteria	p__Bacteroidetes	c__Bacteroidia	o__Bacteroidales	f__Muribaculaceae	g__norank_f__Muribaculaceae	s__uncultured_bacterium_g__norank_f__Muribaculaceae	OTU732	1780	269	4663	244	2204	584	1002	1830	72	897	2	0	0	0	0	1	0	5	0	1	1	8	1	0	4	0	1	0	1	0
d__Bacteria	k__norank_d__Bacteria	p__Bacteroidetes	c__Bacteroidia	o__Bacteroidales	f__Muribaculaceae	g__norank_f__Muribaculaceae	s__uncultured_bacterium_g__norank_f__Muribaculaceae	OTU216	24	18	30	8	29	1	3	3	1	15	3	0	0	0	9	4	0	8	0	1	0	0	0	0	0	0	0	0	0	0
d__Bacteria	k__norank_d__Bacteria	p__Bacteroidetes	c__Bacteroidia	o__Bacteroidales	f__Muribaculaceae	g__norank_f__Muribaculaceae	s__unclassified_g__norank_f__Muribaculaceae	OTU1073	0	0	0	1	0	0	0	1	2	0	0	4	0	0	0	0	1	0	0	0	0	2	8	2	5	0	0	1	2	0
d__Bacteria	k__norank_d__Bacteria	p__Bacteroidetes	c__Bacteroidia	o__Bacteroidales	f__Tannerellaceae	g__Parabacteroides	s__unclassified_g__Parabacteroides	OTU952	0	1	0	0	0	0	0	0	0	0	1	0	0	0	0	1	0	0	0	1	1	4	4	3	6	0	1	0	2	0
d__Bacteria	k__norank_d__Bacteria	p__Bacteroidetes	c__Bacteroidia	o__Bacteroidales	f__Muribaculaceae	g__norank_f__Muribaculaceae	s__unclassified_g__norank_f__Muribaculaceae	OTU186	7	0	4	7	6	1	5	4	4	0	8	0	0	0	6	0	0	1	0	7	2	0	0	0	0	0	0	0	0	0
d__Bacteria	k__norank_d__Bacteria	p__Proteobacteria	c__Gammaproteobacteria	o__Enterobacteriales	f__Enterobacteriaceae	g__Escherichia-Shigella	s__Escherichia_coli_g__Escherichia-Shigella	OTU70	0	0	1	0	0	2	1	0	0	0	0	4	1	8	0	0	6	0	2	0	0	0	1	0	0	0	2	0	0	0
d__Bacteria	k__norank_d__Bacteria	p__Actinobacteria	c__Actinobacteria	o__Coriobacteriales	f__Eggerthellaceae	g__Parvibacter	s__uncultured_bacterium_g__Parvibacter	OTU656	0	0	3	0	14	3	0	0	9	0	2	0	0	0	0	0	0	0	0	0	0	9	4	3	0	0	3	1	1	1
d__Bacteria	k__norank_d__Bacteria	p__Bacteroidetes	c__Bacteroidia	o__Bacteroidales	f__Muribaculaceae	g__norank_f__Muribaculaceae	s__uncultured_bacterium_g__norank_f__Muribaculaceae	OTU586	3	2	2	0	0	0	2	1	0	1	1	0	0	0	1	1	1	2	0	0	6	0	0	0	0	0	0	10	1	0
d__Bacteria	k__norank_d__Bacteria	p__Actinobacteria	c__Actinobacteria	o__Coriobacteriales	f__Eggerthellaceae	g__Enterorhabdus	s__uncultured_bacterium_g__Enterorhabdus	OTU693	316	389	457	331	116	7	138	553	7	726	1	3	0	0	0	4	0	0	0	3	0	2	3	2	2	0	3	0	0	0
d__Bacteria	k__norank_d__Bacteria	p__Bacteroidetes	c__Bacteroidia	o__Bacteroidales	f__Muribaculaceae	g__norank_f__Muribaculaceae	s__unclassified_g__norank_f__Muribaculaceae	OTU448	0	0	0	0	0	0	0	0	0	2	2	3	2	4	2	2	4	4	0	0	0	0	0	0	0	0	0	0	0	0
d__Bacteria	k__norank_d__Bacteria	p__Bacteroidetes	c__Bacteroidia	o__Bacteroidales	f__unclassified_o__Bacteroidales	g__unclassified_o__Bacteroidales	s__unclassified_o__Bacteroidales	OTU663	9	3	29	11	4	8	0	1	4	2	1	0	0	0	1	0	1	0	0	0	0	1	12	0	6	0	0	0	0	1
d__Bacteria	k__norank_d__Bacteria	p__Bacteroidetes	c__Bacteroidia	o__Bacteroidales	f__Muribaculaceae	g__norank_f__Muribaculaceae	s__uncultured_bacterium_g__norank_f__Muribaculaceae	OTU376	2	0	0	0	0	0	0	0	0	0	1	0	1	0	0	0	0	0	0	0	0	3	1	0	0	0	3	2	10	2
d__Bacteria	k__norank_d__Bacteria	p__Firmicutes	c__Clostridia	o__Clostridiales	f__Family_XIII	g__[Eubacterium]_brachy_group	s__uncultured_bacterium_g__[Eubacterium]_brachy_group	OTU223	0	0	1	10	0	1	0	1	0	0	1	2	3	0	2	0	0	0	2	2	0	1	0	3	0	3	0	1	1	2
d__Bacteria	k__norank_d__Bacteria	p__Bacteroidetes	c__Bacteroidia	o__Bacteroidales	f__Prevotellaceae	g__unclassified_f__Prevotellaceae	s__unclassified_f__Prevotellaceae	OTU71	108	16	23	20	15	1	0	0	0	1	0	0	1	0	0	0	0	0	0	0	0	2	0	0	7	0	9	2	1	0
d__Bacteria	k__norank_d__Bacteria	p__Bacteroidetes	c__Bacteroidia	o__Bacteroidales	f__unclassified_o__Bacteroidales	g__unclassified_o__Bacteroidales	s__unclassified_o__Bacteroidales	OTU538	33	14	8	0	30	8	0	0	5	2	0	0	0	0	0	0	0	0	0	0	0	0	6	9	4	0	0	0	3	0
d__Bacteria	k__norank_d__Bacteria	p__Bacteroidetes	c__Bacteroidia	o__Bacteroidales	f__Muribaculaceae	g__norank_f__Muribaculaceae	s__uncultured_bacterium_g__norank_f__Muribaculaceae	OTU769	54	12	8	5	24	0	6	31	1	12	3	3	1	1	6	1	0	1	0	6	0	0	0	0	0	0	0	0	0	0
d__Bacteria	k__norank_d__Bacteria	p__Firmicutes	c__Clostridia	o__Clostridiales	f__Clostridiales_vadinBB60_group	g__norank_f__Clostridiales_vadinBB60_group	s__unclassified_g__norank_f__Clostridiales_vadinBB60_group	OTU486	2	3	0	1	1	1	2	0	2	0	2	2	1	1	2	0	0	0	8	1	0	1	1	0	1	1	1	0	0	0
d__Bacteria	k__norank_d__Bacteria	p__Bacteroidetes	c__Bacteroidia	o__Bacteroidales	f__Muribaculaceae	g__norank_f__Muribaculaceae	s__unclassified_g__norank_f__Muribaculaceae	OTU940	0	0	0	0	0	2	1	0	2	0	0	0	0	0	0	0	0	0	0	0	2	2	1	0	1	5	1	2	1	7
d__Bacteria	k__norank_d__Bacteria	p__Tenericutes	c__Mollicutes	o__Mollicutes_RF39	f__norank_o__Mollicutes_RF39	g__norank_f__norank_o__Mollicutes_RF39	s__unclassified_g__norank_f__norank_o__Mollicutes_RF39	OTU801	228	362	98	244	99	434	417	170	113	1242	0	0	1	0	3	5	1	2	3	1	1	0	0	0	0	2	1	0	0	2
d__Bacteria	k__norank_d__Bacteria	p__Firmicutes	c__Clostridia	o__Clostridiales	f__Lachnospiraceae	g__unclassified_f__Lachnospiraceae	s__unclassified_f__Lachnospiraceae	OTU895	0	3	1	0	0	0	0	0	0	0	2	0	1	2	0	0	5	0	2	0	3	2	0	0	0	0	0	2	2	1
d__Bacteria	k__norank_d__Bacteria	p__unclassified_k__norank_d__Bacteria	c__unclassified_k__norank_d__Bacteria	o__unclassified_k__norank_d__Bacteria	f__unclassified_k__norank_d__Bacteria	g__unclassified_k__norank_d__Bacteria	s__unclassified_k__norank_d__Bacteria	OTU40	0	0	0	0	0	0	0	0	0	0	0	1	0	0	0	0	3	0	0	0	0	11	4	2	1	0	0	0	0	0
d__Bacteria	k__norank_d__Bacteria	p__Actinobacteria	c__Actinobacteria	o__Corynebacteriales	f__Nocardiaceae	g__Rhodococcus	s__Rhodococcus_erythropolis	OTU266	13	4	5	4	6	5	6	2	3	0	0	0	4	0	0	0	0	0	14	0	1	0	1	0	0	1	0	0	0	0
d__Bacteria	k__norank_d__Bacteria	p__Bacteroidetes	c__Bacteroidia	o__Bacteroidales	f__Muribaculaceae	g__norank_f__Muribaculaceae	s__uncultured_bacterium_g__norank_f__Muribaculaceae	OTU828	121	86	317	167	76	9	66	172	22	173	0	9	7	0	0	0	5	0	0	0	0	0	0	0	0	0	0	0	0	0
d__Bacteria	k__norank_d__Bacteria	p__Firmicutes	c__Erysipelotrichia	o__Erysipelotrichales	f__Erysipelotrichaceae	g__Dubosiella	s__uncultured_Erysipelotrichales_bacterium_g__Dubosiella	OTU942	7	4	4	1	4	2	3	4	5	4	0	2	0	1	3	1	0	0	1	0	1	0	2	0	0	5	5	0	0	0
d__Bacteria	k__norank_d__Bacteria	p__Bacteroidetes	c__Bacteroidia	o__Bacteroidales	f__Muribaculaceae	g__norank_f__Muribaculaceae	s__uncultured_Bacteroidales_bacterium_g__norank_f__Muribaculaceae	OTU583	0	1	0	4	0	0	0	3	0	5	1	0	0	0	0	0	0	0	0	0	0	0	4	0	5	1	0	3	0	7
d__Bacteria	k__norank_d__Bacteria	p__Bacteroidetes	c__Bacteroidia	o__Bacteroidales	f__Muribaculaceae	g__norank_f__Muribaculaceae	s__uncultured_bacterium_g__norank_f__Muribaculaceae	OTU326	0	2	4	0	1	5	3	1	3	0	0	0	1	0	1	0	0	2	0	0	0	0	3	0	0	0	5	1	8	0
d__Bacteria	k__norank_d__Bacteria	p__Bacteroidetes	c__Bacteroidia	o__Bacteroidales	f__Muribaculaceae	g__norank_f__Muribaculaceae	s__uncultured_bacterium_g__norank_f__Muribaculaceae	OTU783	7	2	2	2	0	0	0	3	0	0	2	0	3	2	2	1	6	0	0	5	0	0	0	0	0	0	0	0	0	0
d__Bacteria	k__norank_d__Bacteria	p__Proteobacteria	c__Gammaproteobacteria	o__Pseudomonadales	f__Moraxellaceae	g__Acinetobacter	s__Acinetobacter_baumannii_g__Acinetobacter	OTU284	44	12	6	23	23	2	0	0	6	0	0	6	1	7	0	0	4	0	0	0	0	1	0	0	0	0	2	0	0	0
d__Bacteria	k__norank_d__Bacteria	p__Bacteroidetes	c__Bacteroidia	o__Bacteroidales	f__Muribaculaceae	g__norank_f__Muribaculaceae	s__uncultured_bacterium_g__norank_f__Muribaculaceae	OTU195	8	43	23	1	0	14	1	0	1	0	2	0	1	1	2	5	0	4	0	5	1	0	0	0	0	0	0	0	0	0
d__Bacteria	k__norank_d__Bacteria	p__Bacteroidetes	c__Bacteroidia	o__Bacteroidales	f__Muribaculaceae	g__norank_f__Muribaculaceae	s__unclassified_g__norank_f__Muribaculaceae	OTU360	4	0	0	0	1	0	15	6	0	5	0	0	0	0	0	0	0	0	0	0	0	12	3	1	0	0	1	0	3	1
d__Bacteria	k__norank_d__Bacteria	p__Bacteroidetes	c__Bacteroidia	o__Bacteroidales	f__unclassified_o__Bacteroidales	g__unclassified_o__Bacteroidales	s__unclassified_o__Bacteroidales	OTU50	50	50	26	6	66	1	47	56	4	13	0	0	0	2	0	0	0	0	0	0	0	0	8	4	3	0	0	0	3	0
d__Bacteria	k__norank_d__Bacteria	p__Firmicutes	c__Clostridia	o__Clostridiales	f__Ruminococcaceae	g__unclassified_f__Ruminococcaceae	s__unclassified_f__Ruminococcaceae	OTU704	0	0	0	0	0	8	1	5	4	6	0	2	0	0	1	0	2	3	2	2	2	1	2	1	0	1	1	0	0	0
d__Bacteria	k__norank_d__Bacteria	p__Bacteroidetes	c__Bacteroidia	o__Bacteroidales	f__Muribaculaceae	g__norank_f__Muribaculaceae	s__uncultured_bacterium_g__norank_f__Muribaculaceae	OTU567	0	0	0	0	0	0	0	0	0	0	2	0	0	0	1	5	0	0	1	2	0	0	5	2	0	0	1	0	1	0
d__Bacteria	k__norank_d__Bacteria	p__Firmicutes	c__Clostridia	o__Clostridiales	f__Ruminococcaceae	g__Ruminococcaceae_UCG-014	s__uncultured_bacterium_g__Ruminococcaceae_UCG-014	OTU14	82	6	93	205	199	16	21	7	7	2	0	1	0	1	1	1	4	2	0	0	4	0	0	0	0	0	4	2	0	0
d__Bacteria	k__norank_d__Bacteria	p__Bacteroidetes	c__Bacteroidia	o__Bacteroidales	f__unclassified_o__Bacteroidales	g__unclassified_o__Bacteroidales	s__unclassified_o__Bacteroidales	OTU791	28	6	20	8	17	0	1	4	0	7	0	0	3	6	0	1	5	5	0	0	0	0	0	0	0	0	0	0	0	0
d__Bacteria	k__norank_d__Bacteria	p__Firmicutes	c__Clostridia	o__Clostridiales	f__Family_XIII	g__Family_XIII_AD3011_group	s__unclassified_g__Family_XIII_AD3011_group	OTU60	0	0	1	1	0	0	0	1	0	1	2	0	2	0	0	2	2	0	0	1	1	0	2	4	2	0	1	1	0	0
d__Bacteria	k__norank_d__Bacteria	p__Firmicutes	c__Clostridia	o__Clostridiales	f__Lachnospiraceae	g__Roseburia	s__unclassified_g__Roseburia	OTU107	323	2045	749	187	59	639	48	0	121	4	7	0	0	3	1	0	0	0	0	0	0	0	0	0	0	0	0	9	0	0
d__Bacteria	k__norank_d__Bacteria	p__Bacteroidetes	c__Bacteroidia	o__Bacteroidales	f__unclassified_o__Bacteroidales	g__unclassified_o__Bacteroidales	s__unclassified_o__Bacteroidales	OTU808	0	277	13	111	8	920	24	10	608	37	1	3	3	4	0	2	2	1	0	4	0	0	0	0	0	0	0	0	0	0
d__Bacteria	k__norank_d__Bacteria	p__Firmicutes	c__Clostridia	o__Clostridiales	f__Ruminococcaceae	g__Ruminiclostridium_5	s__uncultured_bacterium_g__Ruminiclostridium_5	OTU133	1	2	1	0	1	0	2	4	0	0	2	0	2	4	0	0	1	0	0	0	3	0	0	0	0	0	4	0	0	3
d__Bacteria	k__norank_d__Bacteria	p__Bacteroidetes	c__Bacteroidia	o__Bacteroidales	f__Muribaculaceae	g__norank_f__Muribaculaceae	s__unclassified_g__norank_f__Muribaculaceae	OTU1107	0	0	0	0	0	0	0	0	0	0	0	4	0	3	0	3	4	5	0	0	0	0	0	0	0	0	0	0	0	0
d__Bacteria	k__norank_d__Bacteria	p__unclassified_k__norank_d__Bacteria	c__unclassified_k__norank_d__Bacteria	o__unclassified_k__norank_d__Bacteria	f__unclassified_k__norank_d__Bacteria	g__unclassified_k__norank_d__Bacteria	s__unclassified_k__norank_d__Bacteria	OTU89	146	355	60	35	61	23	50	76	66	84	0	0	4	1	0	0	1	0	0	0	0	1	0	0	0	2	0	4	3	3
d__Bacteria	k__norank_d__Bacteria	p__Actinobacteria	c__Actinobacteria	o__Corynebacteriales	f__Corynebacteriaceae	g__Corynebacterium_1	s__Corynebacterium_stationis	OTU1087	119	299	71	245	34	36	49	67	122	29	1	1	0	5	5	1	2	0	1	0	0	0	0	1	0	0	0	2	0	0
d__Bacteria	k__norank_d__Bacteria	p__Bacteroidetes	c__Bacteroidia	o__Bacteroidales	f__Muribaculaceae	g__norank_f__Muribaculaceae	s__unclassified_g__norank_f__Muribaculaceae	OTU206	0	0	0	0	0	59	16	5	15	1	1	1	5	1	0	3	0	1	0	3	4	0	0	0	0	0	0	0	0	0
d__Bacteria	k__norank_d__Bacteria	p__Firmicutes	c__Bacilli	o__Bacillales	f__Staphylococcaceae	g__Staphylococcus	s__unclassified_g__Staphylococcus	OTU255	0	4	0	3	0	0	0	2	0	3	0	0	0	1	0	1	0	0	15	0	0	0	1	0	0	0	0	1	0	0
d__Bacteria	k__norank_d__Bacteria	p__Bacteroidetes	c__Bacteroidia	o__Bacteroidales	f__Muribaculaceae	g__norank_f__Muribaculaceae	s__unclassified_g__norank_f__Muribaculaceae	OTU603	17	0	2	1	2	0	0	0	0	0	0	0	0	0	0	0	0	0	0	1	0	2	8	1	0	0	6	0	1	0
d__Bacteria	k__norank_d__Bacteria	p__Firmicutes	c__Clostridia	o__Clostridiales	f__Ruminococcaceae	g__Ruminiclostridium_6	s__unclassified_g__Ruminiclostridium_6	OTU28	1	9	7	1	12	2	0	3	3	0	0	0	4	0	0	0	1	0	0	1	5	1	0	0	0	0	4	0	3	0
d__Bacteria	k__norank_d__Bacteria	p__Firmicutes	c__Erysipelotrichia	o__Erysipelotrichales	f__Erysipelotrichaceae	g__Erysipelatoclostridium	s__unclassified_g__Erysipelatoclostridium	OTU106	0	0	0	0	0	0	0	0	0	0	3	2	1	0	0	0	1	1	0	0	0	3	3	0	0	1	3	1	0	0
d__Bacteria	k__norank_d__Bacteria	p__unclassified_k__norank_d__Bacteria	c__unclassified_k__norank_d__Bacteria	o__unclassified_k__norank_d__Bacteria	f__unclassified_k__norank_d__Bacteria	g__unclassified_k__norank_d__Bacteria	s__unclassified_k__norank_d__Bacteria	OTU363	163	169	31	1	62	1	15	66	0	35	0	0	0	1	1	0	1	0	0	1	2	0	3	0	0	4	1	1	2	2
d__Bacteria	k__norank_d__Bacteria	p__Bacteroidetes	c__Bacteroidia	o__Bacteroidales	f__unclassified_o__Bacteroidales	g__unclassified_o__Bacteroidales	s__unclassified_o__Bacteroidales	OTU219	0	0	0	0	0	1	0	0	0	0	1	4	0	4	0	0	0	7	0	0	0	1	0	0	1	0	0	0	1	0
d__Bacteria	k__norank_d__Bacteria	p__Bacteroidetes	c__Bacteroidia	o__Bacteroidales	f__unclassified_o__Bacteroidales	g__unclassified_o__Bacteroidales	s__unclassified_o__Bacteroidales	OTU1005	0	2	4	2	17	15	31	10	0	0	0	0	1	0	6	6	1	2	0	2	0	0	0	0	0	0	0	0	0	0
d__Bacteria	k__norank_d__Bacteria	p__Bacteroidetes	c__Bacteroidia	o__Bacteroidales	f__Muribaculaceae	g__norank_f__Muribaculaceae	s__uncultured_bacterium_g__norank_f__Muribaculaceae	OTU52	37	1	54	1	14	0	0	5	0	0	0	4	0	1	0	0	0	0	0	0	0	0	1	4	4	1	0	2	1	0
d__Bacteria	k__norank_d__Bacteria	p__Bacteroidetes	c__Bacteroidia	o__Bacteroidales	f__Muribaculaceae	g__norank_f__Muribaculaceae	s__uncultured_bacterium_g__norank_f__Muribaculaceae	OTU1064	0	3	0	11	0	1	3	1	0	17	1	0	0	1	1	1	0	0	0	2	0	2	0	0	0	1	4	2	2	1
d__Bacteria	k__norank_d__Bacteria	p__Firmicutes	c__Clostridia	o__Clostridiales	f__Ruminococcaceae	g__Ruminococcaceae_UCG-014	s__unclassified_g__Ruminococcaceae_UCG-014	OTU795	25	26	15	69	19	77	58	8	11	33	7	0	0	0	1	2	3	2	0	3	0	0	0	0	0	0	0	0	0	0
d__Bacteria	k__norank_d__Bacteria	p__Firmicutes	c__Clostridia	o__Clostridiales	f__Clostridiales_vadinBB60_group	g__norank_f__Clostridiales_vadinBB60_group	s__unclassified_g__norank_f__Clostridiales_vadinBB60_group	OTU843	9	13	3	24	5	11	4	4	3	24	1	1	0	1	0	0	0	4	3	4	0	0	0	0	3	0	1	0	0	0
d__Bacteria	k__norank_d__Bacteria	p__Tenericutes	c__Mollicutes	o__Mollicutes_RF39	f__norank_o__Mollicutes_RF39	g__norank_f__norank_o__Mollicutes_RF39	s__uncultured_Erysipelotrichaceae_bacterium_g__norank	OTU1104	0	1	0	0	0	0	0	0	0	0	6	0	1	0	1	4	0	0	0	5	0	0	0	0	0	0	0	0	1	0
d__Bacteria	k__norank_d__Bacteria	p__Firmicutes	c__Clostridia	o__Clostridiales	f__Lachnospiraceae	g__Lachnospiraceae_NK4A136_group	s__uncultured_bacterium_g__Lachnospiraceae_NK4A136_group	OTU325	17	89	19	34	23	155	14	1	180	16	3	0	2	1	0	6	3	0	0	0	0	0	0	0	0	1	0	0	2	0
d__Bacteria	k__norank_d__Bacteria	p__Firmicutes	c__Clostridia	o__Clostridiales	f__Lachnospiraceae	g__unclassified_f__Lachnospiraceae	s__unclassified_f__Lachnospiraceae	OTU396	0	1	0	3	0	0	3	6	0	0	0	0	0	0	0	0	0	3	5	0	2	0	0	1	0	0	7	0	0	0
d__Bacteria	k__norank_d__Bacteria	p__Firmicutes	c__Clostridia	o__Clostridiales	f__Ruminococcaceae	g__unclassified_f__Ruminococcaceae	s__unclassified_f__Ruminococcaceae	OTU912	33	86	60	90	52	126	52	28	80	37	0	1	1	2	1	0	1	1	0	0	2	2	2	0	2	0	1	1	1	0
d__Bacteria	k__norank_d__Bacteria	p__Firmicutes	c__Clostridia	o__Clostridiales	f__Lachnospiraceae	g__Lachnospiraceae_NK4A136_group	s__Lachnospiraceae_bacterium_COE1	OTU58	15	0	5	2	3	1	6	14	0	0	1	2	0	0	0	1	2	0	0	0	1	6	0	0	1	2	1	0	0	0
d__Bacteria	k__norank_d__Bacteria	p__Firmicutes	c__Clostridia	o__Clostridiales	f__Lachnospiraceae	g__unclassified_f__Lachnospiraceae	s__unclassified_f__Lachnospiraceae	OTU660	5	2	0	3	1	1	1	1	3	3	2	0	0	2	0	1	0	1	1	0	1	4	0	0	0	2	1	0	2	0
d__Bacteria	k__norank_d__Bacteria	p__Bacteroidetes	c__Bacteroidia	o__Bacteroidales	f__unclassified_o__Bacteroidales	g__unclassified_o__Bacteroidales	s__unclassified_o__Bacteroidales	OTU334	0	0	0	3	0	2	1	0	0	0	2	1	0	0	0	0	0	1	0	0	0	1	1	2	0	0	0	1	2	6
d__Bacteria	k__norank_d__Bacteria	p__Firmicutes	c__Clostridia	o__Clostridiales	f__Lachnospiraceae	g__unclassified_f__Lachnospiraceae	s__unclassified_f__Lachnospiraceae	OTU596	100	86	602	1643	84	73	185	58	46	70	2	0	0	1	0	0	1	1	0	0	3	4	0	0	0	0	3	0	2	0
d__Bacteria	k__norank_d__Bacteria	p__Firmicutes	c__Clostridia	o__Clostridiales	f__Lachnospiraceae	g__unclassified_f__Lachnospiraceae	s__unclassified_f__Lachnospiraceae	OTU337	107	46	105	53	245	45	6	13	9	10	0	0	1	1	0	0	0	0	0	0	1	0	1	0	0	5	1	3	1	3
d__Bacteria	k__norank_d__Bacteria	p__Bacteroidetes	c__Bacteroidia	o__Bacteroidales	f__Muribaculaceae	g__norank_f__Muribaculaceae	s__uncultured_bacterium_g__norank_f__Muribaculaceae	OTU148	0	0	0	0	0	0	0	0	1	1	1	0	0	16	0	0	0	0	0	0	0	0	0	0	0	0	0	0	0	0
d__Bacteria	k__norank_d__Bacteria	p__Bacteroidetes	c__Bacteroidia	o__Bacteroidales	f__Tannerellaceae	g__Parabacteroides	s__unclassified_g__Parabacteroides	OTU83	15	1	4	1	2	0	5	3	1	1	0	4	0	0	0	0	0	0	0	0	0	0	5	1	2	2	0	1	0	1
d__Bacteria	k__norank_d__Bacteria	p__Bacteroidetes	c__Bacteroidia	o__Bacteroidales	f__Muribaculaceae	g__norank_f__Muribaculaceae	s__unclassified_g__norank_f__Muribaculaceae	OTU168	231	34	163	9	247	2	58	253	0	37	1	3	3	1	1	4	1	2	0	0	0	0	0	0	0	0	0	0	0	0
d__Bacteria	k__norank_d__Bacteria	p__unclassified_k__norank_d__Bacteria	c__unclassified_k__norank_d__Bacteria	o__unclassified_k__norank_d__Bacteria	f__unclassified_k__norank_d__Bacteria	g__unclassified_k__norank_d__Bacteria	s__unclassified_k__norank_d__Bacteria	OTU609	116	159	38	139	44	5	30	57	1	68	0	0	0	0	1	1	0	0	0	0	7	0	2	1	0	0	0	0	4	0
d__Bacteria	k__norank_d__Bacteria	p__Bacteroidetes	c__Bacteroidia	o__Bacteroidales	f__Muribaculaceae	g__unclassified_f__Muribaculaceae	s__unclassified_f__Muribaculaceae	OTU892	0	0	0	0	0	0	0	1	0	0	0	0	1	0	0	0	0	0	0	1	3	0	4	1	0	0	0	4	2	0
d__Bacteria	k__norank_d__Bacteria	p__Actinobacteria	c__Actinobacteria	o__Coriobacteriales	f__Eggerthellaceae	g__Enterorhabdus	s__uncultured_bacterium_g__Enterorhabdus	OTU192	0	0	0	0	0	0	0	0	0	5	2	0	0	0	4	4	3	0	0	3	0	0	0	0	0	0	0	0	0	0
d__Bacteria	k__norank_d__Bacteria	p__Firmicutes	c__Clostridia	o__Clostridiales	f__Christensenellaceae	g__norank_f__Christensenellaceae	s__uncultured_bacterium_g__norank_f__Christensenellaceae	OTU475	15	20	7	55	3	1	19	46	1	66	2	0	0	0	0	1	1	2	1	0	1	0	1	1	0	0	2	3	1	0
d__Bacteria	k__norank_d__Bacteria	p__Bacteroidetes	c__Bacteroidia	o__Bacteroidales	f__Muribaculaceae	g__norank_f__Muribaculaceae	s__unclassified_g__norank_f__Muribaculaceae	OTU841	0	0	0	0	0	0	0	0	0	0	2	0	1	3	2	0	4	3	0	1	0	0	0	0	0	0	0	0	0	0
d__Bacteria	k__norank_d__Bacteria	p__Firmicutes	c__Clostridia	o__Clostridiales	f__Clostridiaceae_1	g__Clostridium_sensu_stricto_1	s__Clostridium_sp._ND2	OTU283	0	0	0	9	0	214	1	2	0	8	0	0	0	0	0	0	3	0	0	0	0	0	0	1	0	1	10	0	1	0
d__Bacteria	k__norank_d__Bacteria	p__Firmicutes	c__Clostridia	o__Clostridiales	f__Lachnospiraceae	g__norank_f__Lachnospiraceae	s__unclassified_g__norank_f__Lachnospiraceae	OTU1032	0	26	1	0	0	67	16	0	52	2	0	2	1	0	0	2	0	1	0	1	1	2	3	0	1	1	1	0	0	0
d__Bacteria	k__norank_d__Bacteria	p__Bacteroidetes	c__Bacteroidia	o__Bacteroidales	f__unclassified_o__Bacteroidales	g__unclassified_o__Bacteroidales	s__unclassified_o__Bacteroidales	OTU482	0	0	3	4	1	3	2	3	2	2	1	0	0	1	1	1	2	5	0	5	0	0	0	0	0	0	0	0	0	0
d__Bacteria	k__norank_d__Bacteria	p__Firmicutes	c__Clostridia	o__Clostridiales	f__Lachnospiraceae	g__unclassified_f__Lachnospiraceae	s__unclassified_f__Lachnospiraceae	OTU379	0	0	0	0	0	0	0	0	0	0	0	0	0	0	2	0	0	0	0	0	1	1	1	10	0	0	0	0	0	0
d__Bacteria	k__norank_d__Bacteria	p__Bacteroidetes	c__Bacteroidia	o__Bacteroidales	f__unclassified_o__Bacteroidales	g__unclassified_o__Bacteroidales	s__unclassified_o__Bacteroidales	OTU594	3	3	5	3	0	5	1	3	2	7	1	0	0	0	3	0	0	0	0	0	4	2	3	0	1	0	0	0	1	0
d__Bacteria	k__norank_d__Bacteria	p__Firmicutes	c__Clostridia	o__Clostridiales	f__Ruminococcaceae	g__unclassified_f__Ruminococcaceae	s__unclassified_f__Ruminococcaceae	OTU696	1	0	1	3	6	3	1	1	3	0	1	0	0	1	0	0	3	1	1	3	0	0	2	0	2	1	0	0	0	0
d__Bacteria	k__norank_d__Bacteria	p__Bacteroidetes	c__Bacteroidia	o__Bacteroidales	f__Muribaculaceae	g__norank_f__Muribaculaceae	s__uncultured_organism_g__norank_f__Muribaculaceae	OTU140	0	0	0	0	0	0	0	0	0	0	1	1	1	0	3	3	4	1	0	1	0	0	0	0	0	0	0	0	0	0
d__Bacteria	k__norank_d__Bacteria	p__Firmicutes	c__Clostridia	o__Clostridiales	f__Ruminococcaceae	g__GCA-900066225	s__unclassified_g__GCA-900066225	OTU822	0	2	0	0	0	0	0	0	1	0	1	0	0	0	0	0	1	12	0	1	0	0	0	0	0	0	0	0	0	0
d__Bacteria	k__norank_d__Bacteria	p__Bacteroidetes	c__Bacteroidia	o__Bacteroidales	f__Bacteroidaceae	g__Bacteroides	s__unclassified_g__Bacteroides	OTU1109	0	134	3	24	1	0	0	0	0	1	2	0	0	0	2	0	0	2	0	0	0	3	2	1	0	0	2	1	0	0
d__Bacteria	k__norank_d__Bacteria	p__Firmicutes	c__Clostridia	o__Clostridiales	f__Ruminococcaceae	g__Hydrogenoanaerobacterium	s__unclassified_g__Hydrogenoanaerobacterium	OTU913	69	140	75	26	16	75	2	1	10	1	1	1	0	0	0	1	0	0	1	0	0	0	0	2	0	3	2	1	0	2
d__Bacteria	k__norank_d__Bacteria	p__Bacteroidetes	c__Bacteroidia	o__Bacteroidales	f__Muribaculaceae	g__norank_f__Muribaculaceae	s__uncultured_bacterium_g__norank_f__Muribaculaceae	OTU697	0	2	7	4	1	4	2	2	4	2	1	0	0	0	1	0	0	1	0	0	1	2	3	2	0	0	0	2	1	0
d__Bacteria	k__norank_d__Bacteria	p__Bacteroidetes	c__Bacteroidia	o__Bacteroidales	f__Rikenellaceae	g__Alistipes	s__uncultured_bacterium_g__Alistipes	OTU214	0	0	0	0	3	0	2	1	0	0	1	2	0	1	0	0	1	4	0	4	1	0	0	0	0	0	0	0	0	0
d__Bacteria	k__norank_d__Bacteria	p__Tenericutes	c__Mollicutes	o__Mollicutes_RF39	f__norank_o__Mollicutes_RF39	g__norank_f__norank_o__Mollicutes_RF39	s__uncultured_bacterium_g__norank_f__norank_o__Mollicutes_RF39	OTU747	46	6	15	3	36	0	9	18	0	10	0	2	0	1	1	0	4	0	0	1	0	0	0	0	0	5	0	0	0	0
d__Bacteria	k__norank_d__Bacteria	p__Bacteroidetes	c__Bacteroidia	o__Bacteroidales	f__Prevotellaceae	g__Prevotellaceae_UCG-001	s__uncultured_bacterium_g__Prevotellaceae_UCG-001	OTU392	1	4	2	5	2	2	3	4	8	6	0	2	0	1	0	0	0	0	0	0	0	0	1	3	5	0	2	0	0	0
d__Bacteria	k__norank_d__Bacteria	p__Bacteroidetes	c__Bacteroidia	o__Sphingobacteriales	f__ST-12K33	g__norank_f__ST-12K33	s__metagenome_g__norank_f__ST-12K33	OTU1018	0	3	1	0	0	5	0	1	7	2	0	0	0	0	0	0	0	0	0	0	0	13	0	0	0	0	1	0	0	0
d__Bacteria	k__norank_d__Bacteria	p__Firmicutes	c__Clostridia	o__Clostridiales	f__Ruminococcaceae	g__Butyricicoccus	s__uncultured_bacterium_g__Butyricicoccus	OTU515	20	2	8	1	31	1	0	0	0	0	0	0	0	0	0	2	1	0	1	0	1	1	0	1	0	0	0	3	3	0
d__Bacteria	k__norank_d__Bacteria	p__Bacteroidetes	c__Bacteroidia	o__Bacteroidales	f__unclassified_o__Bacteroidales	g__unclassified_o__Bacteroidales	s__unclassified_o__Bacteroidales	OTU80	0	0	0	5	0	0	0	0	0	0	0	0	0	0	0	0	0	0	0	0	0	2	3	4	3	0	0	0	1	0
d__Bacteria	k__norank_d__Bacteria	p__Tenericutes	c__Mollicutes	o__Mollicutes_RF39	f__norank_o__Mollicutes_RF39	g__norank_f__norank_o__Mollicutes_RF39	s__uncultured_Erysipelotrichaceae_bacterium_g__norank	OTU533	0	0	0	0	0	0	0	0	0	0	0	1	0	0	1	0	0	1	0	0	1	0	5	0	1	1	0	2	0	0
d__Bacteria	k__norank_d__Bacteria	p__Bacteroidetes	c__Bacteroidia	o__Bacteroidales	f__Muribaculaceae	g__norank_f__Muribaculaceae	s__uncultured_bacterium_g__norank_f__Muribaculaceae	OTU681	18	4	0	10	1	0	1	2	0	0	0	0	0	0	0	0	0	0	0	0	3	0	1	0	0	1	0	7	0	0
d__Bacteria	k__norank_d__Bacteria	p__Firmicutes	c__Clostridia	o__Clostridiales	f__Peptostreptococcaceae	g__Romboutsia	s__uncultured_bacterium_g__Romboutsia	OTU236	0	2	0	1	0	0	0	0	0	0	0	0	0	0	0	0	0	0	7	0	0	2	0	0	0	0	3	0	0	0
d__Bacteria	k__norank_d__Bacteria	p__Bacteroidetes	c__Bacteroidia	o__Bacteroidales	f__Muribaculaceae	g__norank_f__Muribaculaceae	s__uncultured_bacterium_g__norank_f__Muribaculaceae	OTU38	801	834	500	1214	191	330	363	661	74	693	1	0	0	1	1	0	0	2	0	0	0	2	0	0	0	0	1	4	0	0
d__Bacteria	k__norank_d__Bacteria	p__Bacteroidetes	c__Bacteroidia	o__Bacteroidales	f__Muribaculaceae	g__norank_f__Muribaculaceae	s__uncultured_Bacteroidales_bacterium_g__norank_f__Muribaculaceae	OTU187	3	2	0	1	1	1	0	0	0	1	2	0	1	3	0	1	0	5	0	0	0	0	0	0	0	0	0	0	0	0
d__Bacteria	k__norank_d__Bacteria	p__Bacteroidetes	c__Bacteroidia	o__Bacteroidales	f__Muribaculaceae	g__norank_f__Muribaculaceae	s__unclassified_g__norank_f__Muribaculaceae	OTU837	0	0	0	0	0	0	0	0	0	0	1	2	1	0	0	0	1	0	0	0	1	0	2	2	1	0	0	0	1	0
d__Bacteria	k__norank_d__Bacteria	p__Bacteroidetes	c__Bacteroidia	o__Bacteroidales	f__Bacteroidales_UCG-001	g__norank_f__Bacteroidales_UCG-001	s__uncultured_prokaryote_g__norank_f__Bacteroidales_UCG-001	OTU317	0	0	0	0	1	1	1	0	1	0	0	0	0	0	0	0	0	0	0	0	0	2	0	8	0	0	2	0	0	0
d__Bacteria	k__norank_d__Bacteria	p__Firmicutes	c__Clostridia	o__Clostridiales	f__Peptococcaceae	g__Peptococcus	s__unclassified_g__Peptococcus	OTU790	3	2	13	2	5	3	1	2	7	1	0	0	0	1	0	1	1	0	0	1	0	1	0	1	0	1	1	0	1	2
d__Bacteria	k__norank_d__Bacteria	p__Proteobacteria	c__Deltaproteobacteria	o__Desulfovibrionales	f__Desulfovibrionaceae	g__Desulfovibrio	s__unclassified_g__Desulfovibrio	OTU945	3	1	3	1	1	3	2	4	2	0	0	0	0	0	1	2	0	0	0	0	1	1	2	1	0	0	1	0	2	0
d__Bacteria	k__norank_d__Bacteria	p__Bacteroidetes	c__Bacteroidia	o__Bacteroidales	f__unclassified_o__Bacteroidales	g__unclassified_o__Bacteroidales	s__unclassified_o__Bacteroidales	OTU676	18	6	55	4	54	0	3	12	2	4	0	2	2	1	0	0	0	0	0	0	0	1	1	0	2	0	0	0	2	0
d__Bacteria	k__norank_d__Bacteria	p__Tenericutes	c__Mollicutes	o__Mollicutes_RF39	f__norank_o__Mollicutes_RF39	g__norank_f__norank_o__Mollicutes_RF39	s__unclassified_g__norank_f__norank_o__Mollicutes_RF39	OTU643	0	1	1	1	1	1	0	2	0	2	1	0	3	0	2	0	0	4	0	0	0	0	0	0	0	0	1	0	0	0
d__Bacteria	k__norank_d__Bacteria	p__Firmicutes	c__Clostridia	o__Clostridiales	f__Defluviitaleaceae	g__Defluviitaleaceae_UCG-011	s__unclassified_g__Defluviitaleaceae_UCG-011	OTU477	0	0	0	0	0	0	0	0	0	0	0	2	1	0	0	0	3	1	2	0	0	2	0	0	0	0	0	0	0	0
d__Bacteria	k__norank_d__Bacteria	p__Tenericutes	c__Mollicutes	o__Mollicutes_RF39	f__norank_o__Mollicutes_RF39	g__norank_f__norank_o__Mollicutes_RF39	s__uncultured_bacterium_g__norank_f__norank_o__Mollicutes_RF39	OTU922	8	1	2	0	1	1	3	0	0	12	1	0	0	0	2	2	0	0	4	0	0	0	0	0	0	0	0	2	0	0
d__Bacteria	k__norank_d__Bacteria	p__Bacteroidetes	c__Bacteroidia	o__Bacteroidales	f__unclassified_o__Bacteroidales	g__unclassified_o__Bacteroidales	s__unclassified_o__Bacteroidales	OTU318	9	63	8	409	14	1089	670	142	87	311	0	0	0	0	0	0	0	0	0	1	0	1	0	0	0	1	0	2	3	3
d__Bacteria	k__norank_d__Bacteria	p__Firmicutes	c__Erysipelotrichia	o__Erysipelotrichales	f__Erysipelotrichaceae	g__norank_f__Erysipelotrichaceae	s__uncultured_bacterium_g__norank_f__Erysipelotrichaceae	OTU458	0	0	0	0	0	0	0	0	0	0	0	1	4	0	3	1	0	2	0	0	0	0	0	0	0	0	0	0	0	0
d__Bacteria	k__norank_d__Bacteria	p__Bacteroidetes	c__Bacteroidia	o__Bacteroidales	f__Muribaculaceae	g__norank_f__Muribaculaceae	s__uncultured_bacterium_g__norank_f__Muribaculaceae	OTU406	4	3	17	3	12	3	6	4	18	1	0	0	0	0	0	0	0	0	0	0	0	2	1	1	1	0	0	2	4	0
d__Bacteria	k__norank_d__Bacteria	p__Firmicutes	c__Clostridia	o__Clostridiales	f__Ruminococcaceae	g__Oscillibacter	s__[Clostridium]_leptum_g__Oscillibacter	OTU817	0	0	0	0	0	0	0	0	0	1	0	0	0	1	0	0	0	1	0	0	1	2	1	0	0	0	1	3	0	1
d__Bacteria	k__norank_d__Bacteria	p__Bacteroidetes	c__Bacteroidia	o__Bacteroidales	f__Muribaculaceae	g__norank_f__Muribaculaceae	s__uncultured_bacterium_g__norank_f__Muribaculaceae	OTU551	1766	50	3378	57	3025	54	35	3	1	1	0	0	1	2	2	1	0	4	0	1	0	0	0	0	0	0	0	0	0	0
d__Bacteria	k__norank_d__Bacteria	p__Firmicutes	c__Clostridia	o__Clostridiales	f__Lachnospiraceae	g__unclassified_f__Lachnospiraceae	s__unclassified_f__Lachnospiraceae	OTU982	356	441	1319	1506	1891	98	685	681	122	182	2	0	1	0	0	0	1	0	0	0	0	1	0	0	0	0	0	5	0	1
d__Bacteria	k__norank_d__Bacteria	p__Firmicutes	c__Clostridia	o__Clostridiales	f__Ruminococcaceae	g__Ruminiclostridium_6	s__unclassified_g__Ruminiclostridium_6	OTU888	1	0	0	0	0	0	0	0	1	0	0	0	2	0	1	0	1	0	0	0	1	1	0	0	0	0	0	0	5	0
d__Bacteria	k__norank_d__Bacteria	p__Firmicutes	c__Clostridia	o__Clostridiales	f__Family_XIII	g__Family_XIII_AD3011_group	s__uncultured_bacterium_g__Family_XIII_AD3011_group	OTU513	0	0	0	0	0	0	0	0	0	0	0	0	2	1	0	0	0	0	1	0	0	2	0	2	0	0	0	0	1	1
d__Bacteria	k__norank_d__Bacteria	p__Bacteroidetes	c__Bacteroidia	o__Bacteroidales	f__Muribaculaceae	g__norank_f__Muribaculaceae	s__uncultured_bacterium_g__norank_f__Muribaculaceae	OTU768	1	0	1	0	2	0	0	0	1	0	4	1	0	0	0	3	0	0	0	2	0	0	0	0	0	0	0	0	0	0
d__Bacteria	k__norank_d__Bacteria	p__Firmicutes	c__Clostridia	o__Clostridiales	f__Ruminococcaceae	g__Ruminococcaceae_UCG-014	s__uncultured_bacterium_g__Ruminococcaceae_UCG-014	OTU397	1	2	0	1	0	0	3	0	1	1	0	0	0	0	0	0	0	4	0	1	0	0	0	0	0	1	2	0	2	0
d__Bacteria	k__norank_d__Bacteria	p__Bacteroidetes	c__Bacteroidia	o__Bacteroidales	f__Muribaculaceae	g__norank_f__Muribaculaceae	s__uncultured_bacterium_g__norank_f__Muribaculaceae	OTU703	2	0	2	4	1	7	4	1	1	7	0	0	0	0	0	0	0	0	0	0	2	2	1	1	0	0	2	0	2	0
d__Bacteria	k__norank_d__Bacteria	p__Firmicutes	c__Clostridia	o__Clostridiales	f__Lachnospiraceae	g__Blautia	s__unclassified_g__Blautia	OTU970	0	0	0	0	0	5	0	0	0	0	0	1	2	1	2	0	0	0	0	0	0	0	0	1	0	3	0	0	0	0
d__Bacteria	k__norank_d__Bacteria	p__Bacteroidetes	c__Bacteroidia	o__Bacteroidales	f__Tannerellaceae	g__Parabacteroides	s__unclassified_g__Parabacteroides	OTU290	36	39	39	64	39	33	14	5	3	4	0	0	1	0	0	0	1	0	0	2	1	0	2	1	1	1	0	0	0	0
d__Bacteria	k__norank_d__Bacteria	p__Fusobacteria	c__Fusobacteriia	o__Fusobacteriales	f__Fusobacteriaceae	g__Fusobacterium	s__unclassified_g__Fusobacterium	OTU235	2	5	3	1	0	0	0	2	7	4	0	0	0	0	0	0	0	0	10	0	0	0	0	0	0	0	0	0	0	0
d__Bacteria	k__norank_d__Bacteria	p__Bacteroidetes	c__Bacteroidia	o__Bacteroidales	f__Rikenellaceae	g__norank_f__Rikenellaceae	s__uncultured_prokaryote_g__norank_f__Rikenellaceae	OTU905	0	0	0	0	0	0	0	0	1	1	0	0	0	0	0	0	0	0	0	0	0	2	0	6	0	0	2	0	0	0
d__Bacteria	k__norank_d__Bacteria	p__Firmicutes	c__Bacilli	o__Lactobacillales	f__Lactobacillaceae	g__Lactobacillus	s__Lactobacillus_intestinalis	OTU154	13	78	11	82	11	6	3	2	3	19	0	0	1	2	0	1	0	1	0	0	5	0	0	0	0	0	0	0	0	0
d__Bacteria	k__norank_d__Bacteria	p__Firmicutes	c__Clostridia	o__Clostridiales	f__Ruminococcaceae	g__Hydrogenoanaerobacterium	s__uncultured_bacterium_g__Hydrogenoanaerobacterium	OTU799	0	0	0	0	0	1	0	2	0	0	0	1	0	1	1	0	0	0	0	1	1	2	0	1	0	1	0	1	0	0
d__Bacteria	k__norank_d__Bacteria	p__Firmicutes	c__Clostridia	o__Clostridiales	f__Ruminococcaceae	g__Ruminiclostridium_1	s__uncultured_bacterium_g__Ruminiclostridium_1	OTU213	0	0	0	0	0	0	1	0	0	2	1	0	1	0	0	1	1	3	1	0	0	0	0	2	0	0	0	0	0	0
d__Bacteria	k__norank_d__Bacteria	p__Tenericutes	c__Mollicutes	o__Anaeroplasmatales	f__Anaeroplasmataceae	g__Anaeroplasma	s__uncultured_bacterium_g__Anaeroplasma	OTU634	0	0	0	0	0	0	0	0	0	0	0	0	6	4	0	0	0	0	0	0	0	0	0	0	0	0	0	0	0	0
d__Bacteria	k__norank_d__Bacteria	p__Firmicutes	c__Clostridia	o__Clostridiales	f__Ruminococcaceae	g__unclassified_f__Ruminococcaceae	s__unclassified_f__Ruminococcaceae	OTU910	0	1	0	0	1	0	0	1	0	0	0	0	0	0	0	0	1	3	2	0	0	1	1	1	0	0	0	0	0	0
d__Bacteria	k__norank_d__Bacteria	p__Firmicutes	c__Clostridia	o__Clostridiales	f__Ruminococcaceae	g__Ruminococcaceae_UCG-010	s__uncultured_bacterium_g__Ruminococcaceae_UCG-010	OTU712	0	0	0	0	0	2	0	0	0	0	1	1	1	0	0	0	1	0	1	0	0	0	0	0	0	0	0	3	1	0
d__Bacteria	k__norank_d__Bacteria	p__Firmicutes	c__Clostridia	o__Clostridiales	f__Lachnospiraceae	g__unclassified_f__Lachnospiraceae	s__unclassified_f__Lachnospiraceae	OTU915	0	2	4	6	0	5	6	2	4	6	0	1	0	1	0	0	0	0	3	0	0	0	0	1	0	2	0	1	0	0
d__Bacteria	k__norank_d__Bacteria	p__Epsilonbacteraeota	c__Campylobacteria	o__Campylobacterales	f__Helicobacteraceae	g__Helicobacter	s__unclassified_g__Helicobacter	OTU997	3	1	5	0	0	3	1	1	2	0	1	0	0	0	1	0	0	1	0	6	0	0	0	0	0	0	0	0	0	0
d__Bacteria	k__norank_d__Bacteria	p__Bacteroidetes	c__Bacteroidia	o__Bacteroidales	f__unclassified_o__Bacteroidales	g__unclassified_o__Bacteroidales	s__unclassified_o__Bacteroidales	OTU1020	10	11	3	14	1	7	9	3	3	12	1	1	0	0	3	0	1	1	0	2	0	0	0	0	0	0	0	0	0	0
d__Bacteria	k__norank_d__Bacteria	p__Bacteroidetes	c__Bacteroidia	o__Bacteroidales	f__unclassified_o__Bacteroidales	g__unclassified_o__Bacteroidales	s__unclassified_o__Bacteroidales	OTU662	0	0	0	0	0	0	0	0	0	0	0	0	0	0	0	0	0	0	0	0	0	1	1	2	4	0	0	1	0	0
d__Bacteria	k__norank_d__Bacteria	p__Firmicutes	c__Clostridia	o__Clostridiales	f__Ruminococcaceae	g__Ruminococcaceae_UCG-014	s__unclassified_g__Ruminococcaceae_UCG-014	OTU212	1	0	0	1	0	5	3	1	3	1	2	0	0	0	0	0	3	1	0	3	0	0	0	0	0	0	0	0	0	0
d__Bacteria	k__norank_d__Bacteria	p__Firmicutes	c__Bacilli	o__Lactobacillales	f__Lactobacillaceae	g__Lactobacillus	s__Lactobacillus_johnsonii	OTU156	0	0	0	0	0	0	9	0	0	0	0	0	3	2	0	0	1	0	0	0	2	0	1	0	0	0	0	0	0	0
d__Bacteria	k__norank_d__Bacteria	p__Bacteroidetes	c__Bacteroidia	o__Bacteroidales	f__unclassified_o__Bacteroidales	g__unclassified_o__Bacteroidales	s__unclassified_o__Bacteroidales	OTU293	0	0	0	0	0	0	0	0	0	0	0	2	0	0	0	0	0	0	0	0	1	0	0	1	1	0	0	2	2	0
d__Bacteria	k__norank_d__Bacteria	p__Proteobacteria	c__Alphaproteobacteria	o__Rhodospirillales	f__norank_o__Rhodospirillales	g__norank_f__norank_o__Rhodospirillales	s__uncultured_proteobacterium_g__norank_f__norank_o__Rhodospirillales	OTU245	67	151	325	192	157	397	615	604	269	87	0	1	0	0	0	0	0	0	6	1	0	0	0	0	0	0	0	0	0	0
d__Bacteria	k__norank_d__Bacteria	p__Bacteroidetes	c__Bacteroidia	o__Flavobacteriales	f__Flavobacteriaceae	g__Myroides	s__Myroides_odoratimimus	OTU550	0	0	0	0	0	0	0	0	0	0	0	1	0	1	0	1	1	0	4	0	0	0	0	0	0	0	0	0	0	0
d__Bacteria	k__norank_d__Bacteria	p__Firmicutes	c__Clostridia	o__Clostridiales	f__Ruminococcaceae	g__unclassified_f__Ruminococcaceae	s__unclassified_f__Ruminococcaceae	OTU239	7	0	4	0	2	0	1	0	0	0	3	0	0	0	0	1	0	2	2	0	0	0	0	0	0	0	0	0	0	0
d__Bacteria	k__norank_d__Bacteria	p__Firmicutes	c__Clostridia	o__Clostridiales	f__Ruminococcaceae	g__Ruminiclostridium_9	s__unclassified_g__Ruminiclostridium_9	OTU30	1	0	0	0	1	0	1	0	0	0	0	0	0	0	1	0	0	2	0	0	0	2	0	1	0	2	0	0	0	0
d__Bacteria	k__norank_d__Bacteria	p__unclassified_k__norank_d__Bacteria	c__unclassified_k__norank_d__Bacteria	o__unclassified_k__norank_d__Bacteria	f__unclassified_k__norank_d__Bacteria	g__unclassified_k__norank_d__Bacteria	s__unclassified_k__norank_d__Bacteria	OTU657	1	1	2	0	4	0	1	0	0	0	0	0	3	0	1	0	0	0	0	0	0	0	0	0	0	0	1	0	1	2
d__Bacteria	k__norank_d__Bacteria	p__Firmicutes	c__Clostridia	o__Clostridiales	f__Lachnospiraceae	g__unclassified_f__Lachnospiraceae	s__unclassified_f__Lachnospiraceae	OTU868	0	0	0	0	0	0	0	0	0	0	0	0	0	1	0	0	0	1	1	1	1	0	0	1	0	0	1	0	1	0
d__Bacteria	k__norank_d__Bacteria	p__Actinobacteria	c__Actinobacteria	o__Micrococcales	f__Micrococcaceae	g__unclassified_f__Micrococcaceae	s__unclassified_f__Micrococcaceae	OTU229	36	15	5	3	14	0	4	28	0	3	0	0	0	0	0	0	0	0	8	0	0	0	0	0	0	0	0	0	0	0
d__Bacteria	k__norank_d__Bacteria	p__Firmicutes	c__Clostridia	o__Clostridiales	f__unclassified_o__Clostridiales	g__unclassified_o__Clostridiales	s__unclassified_o__Clostridiales	OTU91	0	0	0	1	0	0	0	0	0	0	0	1	1	0	0	1	0	0	0	1	0	0	0	0	1	1	0	1	0	1
d__Bacteria	k__norank_d__Bacteria	p__Firmicutes	c__Clostridia	o__Clostridiales	f__Lachnospiraceae	g__unclassified_f__Lachnospiraceae	s__unclassified_f__Lachnospiraceae	OTU734	0	0	0	0	0	0	0	0	0	0	0	0	0	3	0	0	0	0	0	0	0	0	1	1	2	0	0	0	0	1
d__Bacteria	k__norank_d__Bacteria	p__Tenericutes	c__Mollicutes	o__Mollicutes_RF39	f__norank_o__Mollicutes_RF39	g__norank_f__norank_o__Mollicutes_RF39	s__uncultured_bacterium_g__norank_f__norank_o__Mollicutes_RF39	OTU178	3	3	0	3	0	1	1	0	0	0	1	0	0	0	1	0	4	0	0	2	0	0	0	0	0	0	0	0	0	0
d__Bacteria	k__norank_d__Bacteria	p__Tenericutes	c__Mollicutes	o__Mollicutes_RF39	f__norank_o__Mollicutes_RF39	g__norank_f__norank_o__Mollicutes_RF39	s__uncultured_bacterium_g__norank_f__norank_o__Mollicutes_RF39	OTU1096	0	1	0	0	0	7	0	0	0	0	1	0	1	0	0	0	2	0	2	0	0	0	0	0	0	0	0	0	0	2
d__Bacteria	k__norank_d__Bacteria	p__Bacteroidetes	c__Bacteroidia	o__Bacteroidales	f__Muribaculaceae	g__norank_f__Muribaculaceae	s__uncultured_bacterium_g__norank_f__Muribaculaceae	OTU426	0	0	0	0	0	0	0	0	0	0	0	0	0	0	0	0	0	2	0	0	0	2	2	0	0	0	1	1	0	0
d__Bacteria	k__norank_d__Bacteria	p__Bacteroidetes	c__Bacteroidia	o__Bacteroidales	f__Muribaculaceae	g__norank_f__Muribaculaceae	s__uncultured_Bacteroidales_bacterium_g__norank_f__Muribaculaceae	OTU607	0	0	2	1	0	0	0	3	15	2	1	0	0	0	0	2	0	1	0	1	0	0	2	0	0	0	1	0	0	0
d__Bacteria	k__norank_d__Bacteria	p__Firmicutes	c__Erysipelotrichia	o__Erysipelotrichales	f__Erysipelotrichaceae	g__Erysipelatoclostridium	s__uncultured_bacterium_g__Erysipelatoclostridium	OTU510	0	0	0	0	0	0	0	0	0	0	0	0	0	0	0	0	0	0	0	0	0	0	2	1	1	1	1	0	1	0
d__Bacteria	k__norank_d__Bacteria	p__Bacteroidetes	c__Bacteroidia	o__Bacteroidales	f__Muribaculaceae	g__norank_f__Muribaculaceae	s__uncultured_bacterium_g__norank_f__Muribaculaceae	OTU8	4	0	7	10	2	1	10	1	1	0	1	0	1	1	1	0	0	1	0	0	2	0	0	0	0	0	0	0	0	0
d__Bacteria	k__norank_d__Bacteria	p__Firmicutes	c__Clostridia	o__Clostridiales	f__Ruminococcaceae	g__Hydrogenoanaerobacterium	s__uncultured_bacterium_g__Hydrogenoanaerobacterium	OTU129	0	0	0	0	0	0	90	93	18	50	1	1	0	0	0	1	0	0	1	0	0	0	0	1	1	0	0	0	0	1
d__Bacteria	k__norank_d__Bacteria	p__Firmicutes	c__Clostridia	o__Clostridiales	f__Ruminococcaceae	g__Ruminococcaceae_UCG-014	s__unclassified_g__Ruminococcaceae_UCG-014	OTU429	0	0	0	0	0	0	1	0	1	0	0	0	0	0	0	0	0	0	1	2	0	0	0	0	0	3	0	1	0	0
d__Bacteria	k__norank_d__Bacteria	p__Firmicutes	c__Clostridia	o__Clostridiales	f__Lachnospiraceae	g__unclassified_f__Lachnospiraceae	s__unclassified_f__Lachnospiraceae	OTU711	0	0	0	0	0	0	0	0	0	2	0	2	0	1	0	0	0	0	0	1	0	0	0	0	1	0	0	2	0	0
d__Bacteria	k__norank_d__Bacteria	p__Proteobacteria	c__Gammaproteobacteria	o__Betaproteobacteriales	f__Burkholderiaceae	g__Oligella	s__Oligella_ureolytica	OTU157	0	0	0	0	0	0	0	0	0	5	0	1	0	3	2	0	1	0	0	0	0	0	0	0	0	0	0	0	0	0
d__Bacteria	k__norank_d__Bacteria	p__Firmicutes	c__Clostridia	o__Clostridiales	f__Ruminococcaceae	g__norank_f__Ruminococcaceae	s__unclassified_g__norank_f__Ruminococcaceae	OTU46	3	24	2	23	3	4	12	7	8	2	0	0	0	0	0	0	0	1	0	0	0	0	0	4	1	0	0	0	1	0
d__Bacteria	k__norank_d__Bacteria	p__Bacteroidetes	c__Bacteroidia	o__Bacteroidales	f__Muribaculaceae	g__norank_f__Muribaculaceae	s__uncultured_bacterium_g__norank_f__Muribaculaceae	OTU581	0	0	0	0	0	0	0	0	0	0	3	0	0	0	0	0	1	0	0	1	1	0	1	0	0	0	0	0	0	0
d__Bacteria	k__norank_d__Bacteria	p__Actinobacteria	c__Actinobacteria	o__Coriobacteriales	f__Eggerthellaceae	g__Enterorhabdus	s__uncultured_bacterium_g__Enterorhabdus	OTU188	18	15	27	14	17	17	9	12	24	3	2	0	0	0	0	0	0	0	1	0	1	0	0	0	1	1	1	0	0	0
d__Bacteria	k__norank_d__Bacteria	p__Firmicutes	c__Clostridia	o__Clostridiales	f__Peptococcaceae	g__norank_f__Peptococcaceae	s__unclassified_g__norank_f__Peptococcaceae	OTU310	0	0	0	0	0	1	0	0	1	0	0	0	1	1	0	1	0	0	0	0	0	2	0	2	0	0	0	0	0	0
d__Bacteria	k__norank_d__Bacteria	p__Bacteroidetes	c__Bacteroidia	o__Bacteroidales	f__Muribaculaceae	g__norank_f__Muribaculaceae	s__uncultured_bacterium_g__norank_f__Muribaculaceae	OTU756	664	254	332	247	214	295	349	340	269	140	0	0	2	1	0	2	0	0	0	0	0	0	0	0	0	0	0	1	0	1
d__Bacteria	k__norank_d__Bacteria	p__Bacteroidetes	c__Bacteroidia	o__Bacteroidales	f__Muribaculaceae	g__norank_f__Muribaculaceae	s__uncultured_bacterium_g__norank_f__Muribaculaceae	OTU563	149	4	223	11	69	0	1	59	0	2	0	0	0	0	1	0	1	0	0	1	0	1	0	2	0	0	1	0	0	0
d__Bacteria	k__norank_d__Bacteria	p__Proteobacteria	c__Gammaproteobacteria	o__Beggiatoales	f__Beggiatoaceae	g__norank_f__Beggiatoaceae	s__uncultured_Alkalilimnicola_sp.	OTU258	73	39	28	101	45	135	14	1	15	16	0	0	0	0	0	0	0	0	6	0	0	0	0	0	1	0	0	0	0	0
d__Bacteria	k__norank_d__Bacteria	p__Bacteroidetes	c__Bacteroidia	o__Bacteroidales	f__Muribaculaceae	g__norank_f__Muribaculaceae	s__unclassified_g__norank_f__Muribaculaceae	OTU673	0	27	4	4	0	201	25	1	33	10	0	0	0	0	0	0	0	0	0	0	0	1	0	0	1	2	1	0	0	2
d__Bacteria	k__norank_d__Bacteria	p__Proteobacteria	c__Gammaproteobacteria	o__Alteromonadales	f__Pseudoalteromonadaceae	g__Pseudoalteromonas	s__unclassified_g__Pseudoalteromonas	OTU232	0	0	0	0	0	0	0	0	0	0	1	1	0	0	0	0	0	0	1	0	0	0	1	1	0	1	0	0	0	0
d__Bacteria	k__norank_d__Bacteria	p__Bacteroidetes	c__Bacteroidia	o__Bacteroidales	f__Muribaculaceae	g__norank_f__Muribaculaceae	s__uncultured_bacterium_g__norank_f__Muribaculaceae	OTU270	0	0	1	0	0	0	0	0	0	2	1	1	0	0	0	0	0	2	0	1	1	0	0	0	0	0	0	0	0	0
d__Bacteria	k__norank_d__Bacteria	p__Bacteroidetes	c__Bacteroidia	o__Bacteroidales	f__Prevotellaceae	g__Alloprevotella	s__uncultured_Bacteroidales_bacterium_g__Alloprevotella	OTU682	140	315	458	130	134	80	93	106	71	19	0	0	0	1	0	0	0	0	0	0	0	0	0	1	2	0	1	0	1	0
d__Bacteria	k__norank_d__Bacteria	p__Proteobacteria	c__Alphaproteobacteria	o__Rhizobiales	f__Xanthobacteraceae	g__Bradyrhizobium	s__unclassified_g__Bradyrhizobium	OTU246	0	1	2	1	0	0	0	0	0	0	0	0	0	0	0	0	0	0	6	0	0	0	0	0	0	0	0	0	0	0
d__Bacteria	k__norank_d__Bacteria	p__Actinobacteria	c__Actinobacteria	o__Coriobacteriales	f__Eggerthellaceae	g__Enterorhabdus	s__uncultured_bacterium_g__Enterorhabdus	OTU651	0	4	5	3	10	3	3	3	0	0	1	0	1	0	0	0	0	0	0	0	0	1	0	0	0	2	1	0	0	0
d__Bacteria	k__norank_d__Bacteria	p__Proteobacteria	c__Alphaproteobacteria	o__Caulobacterales	f__Caulobacteraceae	g__norank_f__Caulobacteraceae	s__uncultured_alpha_proteobacterium_g__norank_f__Caulobacteraceae	OTU230	1	0	3	2	5	0	0	0	0	0	0	0	0	0	0	0	0	0	6	0	0	0	0	0	0	0	0	0	0	0
d__Bacteria	k__norank_d__Bacteria	p__Bacteroidetes	c__Bacteroidia	o__Bacteroidales	f__unclassified_o__Bacteroidales	g__unclassified_o__Bacteroidales	s__unclassified_o__Bacteroidales	OTU574	0	0	0	1	0	0	0	0	1	0	0	0	0	0	0	0	0	0	0	0	1	2	1	0	2	0	0	0	0	0
d__Bacteria	k__norank_d__Bacteria	p__Bacteroidetes	c__Bacteroidia	o__Bacteroidales	f__Bacteroidaceae	g__Bacteroides	s__unclassified_g__Bacteroides	OTU812	197	67	73	40	5	17	14	3	40	4	0	0	1	0	0	0	0	0	0	1	0	0	0	0	2	0	0	1	0	1
d__Bacteria	k__norank_d__Bacteria	p__Cyanobacteria	c__Melainabacteria	o__Gastranaerophilales	f__norank_o__Gastranaerophilales	g__norank_f__norank_o__Gastranaerophilales	s__uncultured_bacterium_g__norank_f__norank_o__Gastranaerophilales	OTU403	0	0	0	0	0	0	0	0	0	0	0	0	0	0	0	0	0	0	0	0	0	0	1	1	3	0	1	0	0	0
d__Bacteria	k__norank_d__Bacteria	p__Bacteroidetes	c__Bacteroidia	o__Bacteroidales	f__unclassified_o__Bacteroidales	g__unclassified_o__Bacteroidales	s__unclassified_o__Bacteroidales	OTU312	34	32	6	23	11	24	25	9	10	20	0	0	0	0	0	0	0	0	0	0	0	1	1	2	2	0	0	0	0	0
d__Bacteria	k__norank_d__Bacteria	p__Bacteroidetes	c__Bacteroidia	o__Bacteroidales	f__Muribaculaceae	g__norank_f__Muribaculaceae	s__uncultured_bacterium_g__norank_f__Muribaculaceae	OTU902	0	0	0	0	0	0	0	0	1	0	0	0	0	0	0	0	2	0	0	0	0	1	1	0	0	1	1	0	0	0
d__Bacteria	k__norank_d__Bacteria	p__Bacteroidetes	c__Bacteroidia	o__Bacteroidales	f__Rikenellaceae	g__Alistipes	s__uncultured_bacterium_g__Alistipes	OTU280	31	12	64	13	9	89	133	10	17	18	0	3	0	1	0	0	2	0	0	0	0	0	0	0	0	0	0	0	0	0
d__Bacteria	k__norank_d__Bacteria	p__Actinobacteria	c__Actinobacteria	o__Coriobacteriales	f__Eggerthellaceae	g__unclassified_f__Eggerthellaceae	s__unclassified_f__Eggerthellaceae	OTU128	9	15	19	26	12	33	63	43	42	12	1	1	0	0	0	1	0	0	0	1	0	0	0	1	0	0	0	0	0	1
d__Bacteria	k__norank_d__Bacteria	p__Bacteroidetes	c__Bacteroidia	o__Bacteroidales	f__Muribaculaceae	g__norank_f__Muribaculaceae	s__unclassified_g__norank_f__Muribaculaceae	OTU805	0	0	0	0	0	0	0	0	0	0	0	1	1	1	1	1	0	1	0	0	0	0	0	0	0	0	0	0	0	0
d__Bacteria	k__norank_d__Bacteria	p__Bacteroidetes	c__Bacteroidia	o__Bacteroidales	f__Rikenellaceae	g__Rikenella	s__Rikenella_microfusus_DSM_15922	OTU207	0	0	0	0	1	0	0	0	0	0	1	0	0	0	2	2	0	0	0	1	0	0	0	0	0	0	0	0	0	0
d__Bacteria	k__norank_d__Bacteria	p__Proteobacteria	c__Gammaproteobacteria	o__Pseudomonadales	f__Pseudomonadaceae	g__Pseudomonas	s__Pseudomonas_aeruginosa_g__Pseudomonas	OTU421	68	56	11	9	32	0	4	29	0	4	2	0	0	1	0	1	1	0	0	0	0	1	0	0	0	0	0	0	0	0
d__Bacteria	k__norank_d__Bacteria	p__Cyanobacteria	c__Melainabacteria	o__Gastranaerophilales	f__norank_o__Gastranaerophilales	g__norank_f__norank_o__Gastranaerophilales	s__unclassified_g__norank_f__norank_o__Gastranaerophilales	OTU876	22	65	55	155	65	81	229	54	96	49	0	0	0	0	0	0	0	0	0	0	0	0	0	0	3	0	0	2	1	0
d__Bacteria	k__norank_d__Bacteria	p__Firmicutes	c__Bacilli	o__Lactobacillales	f__Lactobacillaceae	g__Lactobacillus	s__unclassified_g__Lactobacillus	OTU1024	1	0	0	0	0	0	0	0	0	2	0	0	0	1	0	0	0	0	0	0	0	0	0	0	0	0	5	0	0	0
d__Bacteria	k__norank_d__Bacteria	p__Bacteroidetes	c__Bacteroidia	o__Flavobacteriales	f__Flavobacteriaceae	g__Myroides	s__Myroides_odoratimimus	OTU226	42	20	35	6	17	0	1	2	0	3	0	1	0	0	0	0	1	0	4	0	0	0	0	0	0	0	0	0	0	0
d__Bacteria	k__norank_d__Bacteria	p__Bacteroidetes	c__Bacteroidia	o__Bacteroidales	f__unclassified_o__Bacteroidales	g__unclassified_o__Bacteroidales	s__unclassified_o__Bacteroidales	OTU313	94	432	84	8	53	281	15	0	32	7	1	0	0	0	0	0	1	1	0	0	2	0	0	0	0	0	0	1	0	0
d__Bacteria	k__norank_d__Bacteria	p__unclassified_k__norank_d__Bacteria	c__unclassified_k__norank_d__Bacteria	o__unclassified_k__norank_d__Bacteria	f__unclassified_k__norank_d__Bacteria	g__unclassified_k__norank_d__Bacteria	s__unclassified_k__norank_d__Bacteria	OTU815	0	1	0	0	0	0	5	0	1	0	0	0	0	3	0	0	0	0	0	0	0	0	1	0	1	0	0	1	0	0
d__Bacteria	k__norank_d__Bacteria	p__unclassified_k__norank_d__Bacteria	c__unclassified_k__norank_d__Bacteria	o__unclassified_k__norank_d__Bacteria	f__unclassified_k__norank_d__Bacteria	g__unclassified_k__norank_d__Bacteria	s__unclassified_k__norank_d__Bacteria	OTU549	0	2	1	0	0	1	1	0	0	1	0	0	0	1	0	2	1	1	0	1	0	0	0	0	0	0	0	0	0	0
d__Bacteria	k__norank_d__Bacteria	p__Firmicutes	c__Clostridia	o__Clostridiales	f__Family_XI_o__Clostridiales	g__Sedimentibacter	s__uncultured_bacterium_g__Sedimentibacter	OTU738	0	0	0	0	0	0	8	10	0	16	0	0	0	0	0	0	0	0	0	0	0	2	0	1	0	0	3	0	0	0
d__Bacteria	k__norank_d__Bacteria	p__Tenericutes	c__Mollicutes	o__Mollicutes_RF39	f__norank_o__Mollicutes_RF39	g__norank_f__norank_o__Mollicutes_RF39	s__uncultured_bacterium_g__norank_f__norank_o__Mollicutes_RF39	OTU468	112	1	367	4	88	1	5	91	0	3	1	0	0	1	0	1	0	0	0	0	0	0	0	0	0	2	0	0	0	0
d__Bacteria	k__norank_d__Bacteria	p__Firmicutes	c__Clostridia	o__Clostridiales	f__Ruminococcaceae	g__Ruminiclostridium	s__[Clostridium]_leptum_g__Ruminiclostridium	OTU1067	0	0	0	0	0	0	1	0	0	0	0	0	0	0	0	0	0	2	0	1	0	0	0	0	0	0	0	2	0	0
d__Bacteria	k__norank_d__Bacteria	p__Firmicutes	c__Clostridia	o__Clostridiales	f__Clostridiales_vadinBB60_group	g__norank_f__Clostridiales_vadinBB60_group	s__uncultured_bacterium_g__norank_f__Clostridiales_vadinBB60_group	OTU977	50	22	64	67	27	16	3	4	11	20	1	0	0	0	0	0	0	0	0	0	3	0	0	0	0	0	1	0	0	0
d__Bacteria	k__norank_d__Bacteria	p__Bacteroidetes	c__Bacteroidia	o__Bacteroidales	f__unclassified_o__Bacteroidales	g__unclassified_o__Bacteroidales	s__unclassified_o__Bacteroidales	OTU752	23	11	41	8	23	26	17	25	15	3	0	3	1	0	0	1	0	0	0	0	0	0	0	0	0	0	0	0	0	0
d__Bacteria	k__norank_d__Bacteria	p__Tenericutes	c__Mollicutes	o__Mollicutes_RF39	f__norank_o__Mollicutes_RF39	g__norank_f__norank_o__Mollicutes_RF39	s__uncultured_bacterium_g__norank_f__norank_o__Mollicutes_RF39	OTU544	39	2	63	30	17	28	2	6	3	40	1	0	0	0	0	1	0	0	0	0	0	0	0	2	0	0	0	1	0	0
d__Bacteria	k__norank_d__Bacteria	p__Bacteroidetes	c__Bacteroidia	o__Bacteroidales	f__Prevotellaceae	g__Alloprevotella	s__unclassified_g__Alloprevotella	OTU889	1	0	0	2	0	0	0	0	0	0	0	1	0	0	0	0	0	0	0	0	0	0	0	0	1	0	0	1	2	0
d__Bacteria	k__norank_d__Bacteria	p__Bacteroidetes	c__Bacteroidia	o__Bacteroidales	f__unclassified_o__Bacteroidales	g__unclassified_o__Bacteroidales	s__unclassified_o__Bacteroidales	OTU573	17	19	12	69	10	64	17	17	26	25	0	0	0	0	0	0	0	0	0	0	1	3	0	0	0	0	0	0	0	1
d__Bacteria	k__norank_d__Bacteria	p__Actinobacteria	c__Actinobacteria	o__Propionibacteriales	f__Propionibacteriaceae	g__Cutibacterium	s__Cutibacterium_acnes_g__Cutibacterium	OTU1031	0	1	0	0	0	0	0	0	1	0	0	0	0	0	0	0	0	0	4	0	0	0	0	0	0	0	1	0	0	0
d__Bacteria	k__norank_d__Bacteria	p__Firmicutes	c__Clostridia	o__Clostridiales	f__Clostridiales_vadinBB60_group	g__norank_f__Clostridiales_vadinBB60_group	s__uncultured_bacterium_g__norank_f__Clostridiales_vadinBB60_group	OTU440	1	0	1	0	0	0	0	0	0	0	0	0	1	0	0	0	0	2	0	0	0	0	0	0	1	0	0	0	1	0
d__Bacteria	k__norank_d__Bacteria	p__Bacteroidetes	c__Bacteroidia	o__Bacteroidales	f__Dysgonomonadaceae	g__Proteiniphilum	s__uncultured_bacterium_g__Proteiniphilum	OTU29	12	0	14	3	7	0	0	0	0	0	0	0	0	0	0	0	0	0	0	0	0	2	0	1	0	0	2	0	0	0
d__Bacteria	k__norank_d__Bacteria	p__Bacteroidetes	c__Bacteroidia	o__Bacteroidales	f__Bacteroidaceae	g__Bacteroides	s__Bacteroides_graminisolvens	OTU31	0	0	0	0	0	0	0	0	0	0	0	0	0	0	0	0	0	0	0	0	0	2	0	3	0	0	0	0	0	0
d__Bacteria	k__norank_d__Bacteria	p__Bacteroidetes	c__Bacteroidia	o__Bacteroidales	f__unclassified_o__Bacteroidales	g__unclassified_o__Bacteroidales	s__unclassified_o__Bacteroidales	OTU659	0	1	0	0	0	5	11	4	3	0	0	0	0	0	0	0	0	0	0	0	3	0	1	1	0	0	0	0	0	0
d__Bacteria	k__norank_d__Bacteria	p__Firmicutes	c__Clostridia	o__Clostridiales	f__Lachnospiraceae	g__Lachnospiraceae_NK4A136_group	s__uncultured_Clostridiales_bacterium_g__Lachnospiraceae_NK4A136_group	OTU861	94	63	22	46	22	24	9	14	0	19	1	0	0	0	0	0	0	0	2	0	0	0	0	0	0	0	0	0	2	0
d__Bacteria	k__norank_d__Bacteria	p__Bacteroidetes	c__Bacteroidia	o__Bacteroidales	f__Muribaculaceae	g__norank_f__Muribaculaceae	s__unclassified_g__norank_f__Muribaculaceae	OTU624	0	0	0	0	0	168	38	14	64	4	0	0	1	0	0	0	2	1	0	0	0	0	0	0	0	1	0	0	0	0
d__Bacteria	k__norank_d__Bacteria	p__Firmicutes	c__Bacilli	o__Lactobacillales	f__Aerococcaceae	g__Facklamia	s__unclassified_g__Facklamia	OTU1019	6	1	3	2	6	0	1	0	0	0	0	1	0	1	0	0	1	0	2	0	0	0	0	0	0	0	0	0	0	0
d__Bacteria	k__norank_d__Bacteria	p__Actinobacteria	c__Actinobacteria	o__Coriobacteriales	f__Eggerthellaceae	g__Gordonibacter	s__uncultured_bacterium_g__Gordonibacter	OTU514	1	0	0	0	0	0	0	0	0	0	3	0	0	0	0	1	0	1	0	0	0	0	0	0	0	0	0	0	0	0
d__Bacteria	k__norank_d__Bacteria	p__Firmicutes	c__Bacilli	o__Bacillales	f__Alicyclobacillaceae	g__Alicyclobacillus	s__unclassified_g__Alicyclobacillus	OTU256	0	0	0	0	0	0	0	0	0	0	0	0	0	0	0	0	0	0	5	0	0	0	0	0	0	0	0	0	0	0
d__Bacteria	k__norank_d__Bacteria	p__Firmicutes	c__Clostridia	o__Clostridiales	f__Clostridiales_vadinBB60_group	g__norank_f__Clostridiales_vadinBB60_group	s__uncultured_bacterium_g__norank_f__Clostridiales_vadinBB60_group	OTU803	4	1	8	5	1	7	12	4	6	10	0	0	0	0	0	0	1	1	0	0	0	1	0	0	1	0	0	0	1	0
d__Bacteria	k__norank_d__Bacteria	p__Proteobacteria	c__Gammaproteobacteria	o__Xanthomonadales	f__Xanthomonadaceae	g__Stenotrophomonas	s__[Pseudomonas]_geniculata_g__Stenotrophomonas	OTU1088	0	0	1	7	0	0	0	0	0	2	0	0	0	0	0	0	0	1	4	0	0	0	0	0	0	0	0	0	0	0
d__Bacteria	k__norank_d__Bacteria	p__Bacteroidetes	c__Bacteroidia	o__Bacteroidales	f__Muribaculaceae	g__norank_f__Muribaculaceae	s__uncultured_bacterium_g__norank_f__Muribaculaceae	OTU629	139	29	106	79	88	207	203	249	38	190	1	0	0	0	0	2	1	1	0	0	0	0	0	0	0	0	0	0	0	0
d__Bacteria	k__norank_d__Bacteria	p__Firmicutes	c__Clostridia	o__Clostridiales	f__Clostridiales_vadinBB60_group	g__norank_f__Clostridiales_vadinBB60_group	s__unclassified_g__norank_f__Clostridiales_vadinBB60_group	OTU209	5	0	0	0	1	1	2	0	0	1	0	0	0	0	0	1	0	0	2	0	0	0	0	0	0	0	1	0	0	1
d__Bacteria	k__norank_d__Bacteria	p__Bacteroidetes	c__Bacteroidia	o__Bacteroidales	f__unclassified_o__Bacteroidales	g__unclassified_o__Bacteroidales	s__unclassified_o__Bacteroidales	OTU879	0	0	1	0	0	0	2	0	0	1	0	0	1	0	1	0	0	0	0	1	0	1	0	0	0	0	0	0	0	1
d__Bacteria	k__norank_d__Bacteria	p__Bacteroidetes	c__Bacteroidia	o__Bacteroidales	f__Muribaculaceae	g__unclassified_f__Muribaculaceae	s__unclassified_f__Muribaculaceae	OTU98	4	140	10	12	6	2	1	0	200	10	0	0	0	1	0	0	0	0	0	0	1	0	0	1	0	0	0	2	0	0
d__Bacteria	k__norank_d__Bacteria	p__Cloacimonetes	c__Cloacimonadia	o__Cloacimonadales	f__Cloacimonadaceae	g__Candidatus_Cloacimonas	s__uncultured_bacterium_g__Candidatus_Cloacimonas	OTU68	19	31	1	58	1	93	54	16	30	117	0	0	0	0	0	0	0	0	0	0	0	0	0	0	0	0	5	0	0	0
d__Bacteria	k__norank_d__Bacteria	p__Bacteroidetes	c__Bacteroidia	o__Bacteroidales	f__Muribaculaceae	g__norank_f__Muribaculaceae	s__uncultured_Bacteroidales_bacterium_g__norank_f__Muribaculaceae	OTU577	6	16	7	5	2	11	2	7	10	13	0	0	0	0	0	0	0	0	0	0	0	0	0	0	0	2	0	0	0	2
d__Bacteria	k__norank_d__Bacteria	p__Bacteroidetes	c__Bacteroidia	o__Bacteroidales	f__Muribaculaceae	g__norank_f__Muribaculaceae	s__uncultured_bacterium_g__norank_f__Muribaculaceae	OTU916	0	0	0	0	0	0	0	0	0	0	1	0	0	0	1	1	0	0	0	1	0	0	0	0	0	0	0	0	0	0
d__Bacteria	k__norank_d__Bacteria	p__Actinobacteria	c__Actinobacteria	o__Corynebacteriales	f__Corynebacteriaceae	g__Lawsonella	s__uncultured_bacterium_g__Lawsonella	OTU248	23	38	3	97	10	30	17	7	9	19	0	0	0	1	0	0	0	0	3	0	0	0	0	0	0	0	0	0	0	0
d__Bacteria	k__norank_d__Bacteria	p__Proteobacteria	c__Deltaproteobacteria	o__Desulfovibrionales	f__Desulfovibrionaceae	g__norank_f__Desulfovibrionaceae	s__uncultured_Desulfovibrionales_bacterium_g__norank_f__Desulfovibrionaceae	OTU123	1	4	1	0	0	0	1	2	0	1	0	1	0	0	0	0	0	0	0	0	0	0	0	0	0	0	0	1	2	0
d__Bacteria	k__norank_d__Bacteria	p__Proteobacteria	c__Alphaproteobacteria	o__Rhizobiales	f__Rhizobiaceae	g__Brucella	s__Brucella_melitensis_g__Brucella	OTU231	50	64	36	59	37	55	27	65	26	64	0	0	0	0	0	0	0	0	4	0	0	0	0	0	0	0	0	0	0	0
d__Bacteria	k__norank_d__Bacteria	p__Tenericutes	c__Mollicutes	o__Mollicutes_RF39	f__norank_o__Mollicutes_RF39	g__norank_f__norank_o__Mollicutes_RF39	s__unclassified_g__norank_f__norank_o__Mollicutes_RF39	OTU121	8	6	19	2	13	11	18	8	1	5	0	0	0	0	0	1	1	0	0	0	0	0	0	0	0	0	1	0	1	0
d__Bacteria	k__norank_d__Bacteria	p__Bacteroidetes	c__Bacteroidia	o__Bacteroidales	f__Prevotellaceae	g__unclassified_f__Prevotellaceae	s__unclassified_f__Prevotellaceae	OTU608	0	0	0	2	0	0	0	0	1	0	0	0	0	0	0	0	0	0	0	0	0	3	0	1	0	0	0	0	0	0
d__Bacteria	k__norank_d__Bacteria	p__Firmicutes	c__Erysipelotrichia	o__Erysipelotrichales	f__Erysipelotrichaceae	g__norank_f__Erysipelotrichaceae	s__uncultured_bacterium_g__norank_f__Erysipelotrichaceae	OTU111	0	0	0	5	0	0	0	0	0	0	0	0	0	0	0	0	0	0	0	0	2	1	0	0	0	0	0	1	0	0
d__Bacteria	k__norank_d__Bacteria	p__Actinobacteria	c__Actinobacteria	o__Corynebacteriales	f__Mycobacteriaceae	g__Mycobacterium	s__uncultured_actinobacterium_g__Mycobacterium	OTU249	14	2	0	2	2	0	1	0	0	0	0	0	0	0	0	0	0	0	4	0	0	0	0	0	0	0	0	0	0	0
d__Bacteria	k__norank_d__Bacteria	p__Tenericutes	c__Mollicutes	o__Mollicutes_RF39	f__norank_o__Mollicutes_RF39	g__norank_f__norank_o__Mollicutes_RF39	s__uncultured_Paenibacillaceae_bacterium_g__norank	OTU260	71	56	33	7	50	0	18	55	0	21	0	0	0	0	0	0	0	0	4	0	0	0	0	0	0	0	0	0	0	0
d__Bacteria	k__norank_d__Bacteria	p__Bacteroidetes	c__Bacteroidia	o__Bacteroidales	f__Muribaculaceae	g__norank_f__Muribaculaceae	s__uncultured_bacterium_g__norank_f__Muribaculaceae	OTU372	32	37	23	47	13	29	6	11	11	9	0	0	0	0	0	0	0	0	0	0	1	0	1	0	0	0	0	2	0	0
d__Bacteria	k__norank_d__Bacteria	p__Firmicutes	c__Clostridia	o__Clostridiales	f__Lachnospiraceae	g__Lachnospiraceae_UCG-010	s__uncultured_bacterium_g__Lachnospiraceae_UCG-010	OTU675	4	2	3	4	6	6	7	2	1	1	1	0	1	0	0	0	0	0	0	1	0	0	0	1	0	0	0	0	0	0
d__Bacteria	k__norank_d__Bacteria	p__Bacteroidetes	c__Bacteroidia	o__Bacteroidales	f__Bacteroidaceae	g__Bacteroides	s__unclassified_g__Bacteroides	OTU394	0	13	0	1	0	0	0	0	0	0	2	0	0	0	0	0	0	0	1	1	0	0	0	0	0	0	0	0	0	0
d__Bacteria	k__norank_d__Bacteria	p__Bacteroidetes	c__Bacteroidia	o__Bacteroidales	f__unclassified_o__Bacteroidales	g__unclassified_o__Bacteroidales	s__unclassified_o__Bacteroidales	OTU548	0	1	0	0	0	0	0	3	0	0	0	1	0	0	0	0	2	0	0	0	0	1	0	0	0	0	0	0	0	0
d__Bacteria	k__norank_d__Bacteria	p__Spirochaetes	c__Spirochaetia	o__Spirochaetales	f__Spirochaetaceae	g__Sphaerochaeta	s__uncultured_bacterium_g__Sphaerochaeta	OTU1036	28	0	113	10	2	14	9	8	1	27	0	0	0	0	0	0	0	0	0	0	0	3	0	1	0	0	0	0	0	0
d__Bacteria	k__norank_d__Bacteria	p__Bacteroidetes	c__Bacteroidia	o__Bacteroidales	f__unclassified_o__Bacteroidales	g__unclassified_o__Bacteroidales	s__unclassified_o__Bacteroidales	OTU720	8	64	14	73	26	119	51	14	130	22	0	0	0	0	2	0	0	0	0	0	1	0	0	0	0	0	0	0	0	1
d__Bacteria	k__norank_d__Bacteria	p__Bacteroidetes	c__Bacteroidia	o__Bacteroidales	f__unclassified_o__Bacteroidales	g__unclassified_o__Bacteroidales	s__unclassified_o__Bacteroidales	OTU302	147	64	610	159	103	0	12	683	9	2236	0	0	0	1	0	0	0	0	0	0	0	2	0	0	0	0	0	0	0	1
d__Bacteria	k__norank_d__Bacteria	p__Actinobacteria	c__Actinobacteria	o__Coriobacteriales	f__Eggerthellaceae	g__unclassified_f__Eggerthellaceae	s__unclassified_f__Eggerthellaceae	OTU191	0	0	0	0	0	0	0	0	0	0	2	0	0	0	0	0	0	0	0	0	1	0	0	0	0	0	0	0	0	1
d__Bacteria	k__norank_d__Bacteria	p__unclassified_k__norank_d__Bacteria	c__unclassified_k__norank_d__Bacteria	o__unclassified_k__norank_d__Bacteria	f__unclassified_k__norank_d__Bacteria	g__unclassified_k__norank_d__Bacteria	s__unclassified_k__norank_d__Bacteria	OTU880	205	870	883	162	972	7	18	606	58	17	0	0	0	0	1	0	1	0	0	0	0	0	0	0	0	2	0	0	0	0
d__Bacteria	k__norank_d__Bacteria	p__Tenericutes	c__Mollicutes	o__Mollicutes_RF39	f__norank_o__Mollicutes_RF39	g__norank_f__norank_o__Mollicutes_RF39	s__unclassified_g__norank_f__norank_o__Mollicutes_RF39	OTU601	1	2	0	0	0	0	0	0	0	0	0	0	0	0	0	0	0	0	3	0	0	0	0	0	0	0	0	1	0	0
d__Bacteria	k__norank_d__Bacteria	p__Tenericutes	c__Mollicutes	o__Mollicutes_RF39	f__norank_o__Mollicutes_RF39	g__norank_f__norank_o__Mollicutes_RF39	s__uncultured_Paenibacillaceae_bacterium_g__norank	OTU864	2	4	1	4	1	2	8	8	1	3	1	0	0	0	0	0	0	0	0	1	0	0	0	0	0	0	0	1	0	0
d__Bacteria	k__norank_d__Bacteria	p__Firmicutes	c__Clostridia	o__Clostridiales	f__Ruminococcaceae	g__norank_f__Ruminococcaceae	s__unclassified_g__norank_f__Ruminococcaceae	OTU120	3	0	0	1	0	4	1	2	2	2	0	0	0	0	0	1	0	0	0	0	1	0	0	0	0	0	0	0	1	0
d__Bacteria	k__norank_d__Bacteria	p__Bacteroidetes	c__Bacteroidia	o__Bacteroidales	f__Muribaculaceae	g__norank_f__Muribaculaceae	s__unclassified_g__norank_f__Muribaculaceae	OTU679	2	2	0	1	2	0	1	1	0	2	0	0	0	0	0	0	0	0	0	0	0	0	1	0	1	0	0	0	0	1
d__Bacteria	k__norank_d__Bacteria	p__Firmicutes	c__Clostridia	o__Clostridiales	f__Eubacteriaceae	g__Anaerofustis	s__unclassified_g__Anaerofustis	OTU699	0	2	8	2	0	0	0	0	0	0	1	0	0	0	0	0	0	0	2	0	0	0	0	0	0	0	0	0	0	0
d__Bacteria	k__norank_d__Bacteria	p__Tenericutes	c__Mollicutes	o__Mollicutes_RF39	f__norank_o__Mollicutes_RF39	g__norank_f__norank_o__Mollicutes_RF39	s__uncultured_bacterium_g__norank_f__norank_o__Mollicutes_RF39	OTU524	18	51	6	6	13	0	2	6	0	6	0	0	0	0	0	0	0	0	0	2	0	0	0	0	0	0	0	0	1	0
d__Bacteria	k__norank_d__Bacteria	p__Bacteroidetes	c__Bacteroidia	o__Bacteroidales	f__Muribaculaceae	g__norank_f__Muribaculaceae	s__uncultured_bacterium_g__norank_f__Muribaculaceae	OTU27	4	9	20	17	7	21	19	18	15	4	0	0	0	0	0	0	0	0	0	0	0	0	1	0	1	0	0	1	0	0
d__Bacteria	k__norank_d__Bacteria	p__Firmicutes	c__Clostridia	o__Clostridiales	f__Ruminococcaceae	g__Ruminococcaceae_UCG-014	s__unclassified_g__Ruminococcaceae_UCG-014	OTU763	0	0	0	0	0	0	0	0	0	0	0	0	1	0	0	0	0	0	0	0	2	0	0	0	0	0	0	0	0	0
d__Bacteria	k__norank_d__Bacteria	p__Patescibacteria	c__Parcubacteria	o__Candidatus_Moranbacteria	f__norank_o__Candidatus_Moranbacteria	g__norank_f__norank_o__Candidatus_Moranbacteria	s__unclassified_g__norank_f__norank_o__Candidatus_Moranbacteria	OTU35	0	1	1	67	2	1	19	15	9	2	0	0	0	0	0	0	0	0	0	0	0	2	0	1	0	0	0	0	0	0
d__Bacteria	k__norank_d__Bacteria	p__Bacteroidetes	c__Bacteroidia	o__Bacteroidales	f__Marinilabiliaceae	g__Ruminofilibacter	s__uncultured_prokaryote_g__Ruminofilibacter	OTU51	31	26	22	22	9	51	17	32	17	39	0	0	0	0	0	0	0	0	0	0	0	0	0	2	0	0	0	1	0	0
d__Bacteria	k__norank_d__Bacteria	p__Bacteroidetes	c__Bacteroidia	o__Bacteroidales	f__Muribaculaceae	g__norank_f__Muribaculaceae	s__uncultured_bacterium_g__norank_f__Muribaculaceae	OTU158	14	0	11	37	3	7	3	4	3	10	0	1	0	2	0	0	0	0	0	0	0	0	0	0	0	0	0	0	0	0
d__Bacteria	k__norank_d__Bacteria	p__Firmicutes	c__Clostridia	o__Clostridiales	f__Christensenellaceae	g__Christensenellaceae_R-7_group	s__uncultured_Clostridium_sp._g__Christensenellaceae_R-7_group	OTU1056	2	0	0	2	0	0	4	0	4	11	0	0	0	0	0	0	0	1	0	1	0	1	0	0	0	0	0	0	0	0
d__Bacteria	k__norank_d__Bacteria	p__Bacteroidetes	c__Bacteroidia	o__Bacteroidales	f__Tannerellaceae	g__Parabacteroides	s__unclassified_g__Parabacteroides	OTU309	103	9	102	68	33	8	24	145	2	9	0	2	0	0	0	0	0	0	0	0	0	0	1	0	0	0	0	0	0	0
d__Bacteria	k__norank_d__Bacteria	p__Bacteroidetes	c__Bacteroidia	o__Bacteroidales	f__unclassified_o__Bacteroidales	g__unclassified_o__Bacteroidales	s__unclassified_o__Bacteroidales	OTU1057	0	0	0	0	0	0	0	0	2	0	0	0	1	1	0	0	0	1	0	0	0	0	0	0	0	0	0	0	0	0
d__Bacteria	k__norank_d__Bacteria	p__unclassified_k__norank_d__Bacteria	c__unclassified_k__norank_d__Bacteria	o__unclassified_k__norank_d__Bacteria	f__unclassified_k__norank_d__Bacteria	g__unclassified_k__norank_d__Bacteria	s__unclassified_k__norank_d__Bacteria	OTU23	33	16	6	27	12	21	32	36	42	42	0	0	0	0	1	0	0	0	0	0	0	0	2	0	0	0	0	0	0	0
d__Bacteria	k__norank_d__Bacteria	p__Bacteroidetes	c__Bacteroidia	o__Bacteroidales	f__Bacteroidaceae	g__Bacteroides	s__Bacteroides_barnesiae	OTU238	0	0	2	0	0	0	0	0	0	0	0	0	0	0	0	0	0	0	3	0	0	0	0	0	0	0	0	0	0	0
d__Bacteria	k__norank_d__Bacteria	p__Patescibacteria	c__Berkelbacteria	o__norank_c__Berkelbacteria	f__norank_o__norank_c__Berkelbacteria	g__norank_f__norank_o__norank_c__Berkelbacteria	s__uncultured_bacterium_g__norank_f__norank_o__norank_c__Berkelbacteria	OTU42	27	25	41	14	34	0	2	10	1	18	0	0	0	0	0	0	0	0	0	0	0	2	0	0	0	0	1	0	0	0
d__Bacteria	k__norank_d__Bacteria	p__Bacteroidetes	c__Bacteroidia	o__Bacteroidales	f__Muribaculaceae	g__norank_f__Muribaculaceae	s__uncultured_bacterium_g__norank_f__Muribaculaceae	OTU414	1	6	9	10	2	2	0	2	2	1	0	0	1	0	0	0	0	0	0	0	0	0	1	0	0	0	0	0	0	1
d__Bacteria	k__norank_d__Bacteria	p__Firmicutes	c__Clostridia	o__Thermoanaerobacterales	f__Family_III	g__Tepidanaerobacter	s__uncultured_bacterium_g__Tepidanaerobacter	OTU268	10	0	11	3	21	3	7	13	0	1	0	0	0	0	0	0	0	0	3	0	0	0	0	0	0	0	0	0	0	0
d__Bacteria	k__norank_d__Bacteria	p__Tenericutes	c__Mollicutes	o__Mollicutes_RF39	f__norank_o__Mollicutes_RF39	g__norank_f__norank_o__Mollicutes_RF39	s__unclassified_g__norank_f__norank_o__Mollicutes_RF39	OTU936	0	1	0	1	1	2	0	0	2	0	0	0	0	0	0	0	0	0	0	1	0	0	0	0	0	1	0	0	0	1
d__Bacteria	k__norank_d__Bacteria	p__Verrucomicrobia	c__Verrucomicrobiae	o__Verrucomicrobiales	f__Akkermansiaceae	g__Akkermansia	s__unclassified_g__Akkermansia	OTU305	5	14	8	10	1	65	30	1	44	4	0	0	0	0	0	0	0	0	0	0	2	0	0	1	0	0	0	0	0	0
d__Bacteria	k__norank_d__Bacteria	p__Firmicutes	c__Clostridia	o__Clostridiales	f__Lachnospiraceae	g__unclassified_f__Lachnospiraceae	s__unclassified_f__Lachnospiraceae	OTU818	16	12	64	5	5	15	8	16	11	3	0	0	0	0	0	0	0	1	0	0	0	0	1	1	0	0	0	0	0	0
d__Bacteria	k__norank_d__Bacteria	p__Firmicutes	c__Clostridia	o__Clostridiales	f__Clostridiaceae_1	g__Clostridium_sensu_stricto_1	s__Clostridium_butyricum	OTU430	0	3	3	1	0	5	1	1	5	2	0	0	0	0	0	0	0	0	0	0	0	0	0	0	0	0	2	0	0	1
d__Bacteria	k__norank_d__Bacteria	p__Bacteroidetes	c__Bacteroidia	o__Bacteroidales	f__Muribaculaceae	g__norank_f__Muribaculaceae	s__uncultured_bacterium_g__norank_f__Muribaculaceae	OTU41	0	0	0	0	0	0	0	0	0	0	0	0	0	0	0	0	0	0	0	0	0	2	1	0	0	0	0	0	0	0
d__Bacteria	k__norank_d__Bacteria	p__Bacteroidetes	c__Bacteroidia	o__Bacteroidales	f__Muribaculaceae	g__norank_f__Muribaculaceae	s__unclassified_g__norank_f__Muribaculaceae	OTU474	0	9	1	0	3	2	5	3	2	0	0	0	0	1	0	0	0	0	0	0	1	0	0	0	0	0	0	0	1	0
d__Bacteria	k__norank_d__Bacteria	p__Proteobacteria	c__Alphaproteobacteria	o__Rhizobiales	f__Rhizobiaceae	g__Paenochrobactrum	s__uncultured_bacterium_g__Paenochrobactrum	OTU428	2	2	0	1	0	0	1	0	0	0	0	0	0	0	1	0	2	0	0	0	0	0	0	0	0	0	0	0	0	0
d__Bacteria	k__norank_d__Bacteria	p__Firmicutes	c__Clostridia	o__Clostridiales	f__Clostridiales_vadinBB60_group	g__norank_f__Clostridiales_vadinBB60_group	s__unclassified_g__norank_f__Clostridiales_vadinBB60_group	OTU420	5	9	10	26	8	2	2	0	4	0	0	0	2	1	0	0	0	0	0	0	0	0	0	0	0	0	0	0	0	0
d__Bacteria	k__norank_d__Bacteria	p__Cyanobacteria	c__Oxyphotobacteria	o__Chloroplast	f__norank_o__Chloroplast	g__norank_f__norank_o__Chloroplast	s__Virgulinella_fragilis	OTU254	0	2	1	3	0	0	0	0	0	0	0	0	0	0	0	0	0	0	2	0	0	0	0	0	0	0	0	0	0	0
d__Bacteria	k__norank_d__Bacteria	p__Firmicutes	c__Clostridia	o__Clostridiales	f__Lachnospiraceae	g__unclassified_f__Lachnospiraceae	s__unclassified_f__Lachnospiraceae	OTU262	0	0	0	0	0	0	0	0	0	0	0	0	0	0	0	0	0	0	2	0	0	0	0	0	0	0	0	0	0	0
d__Bacteria	k__norank_d__Bacteria	p__Proteobacteria	c__Deltaproteobacteria	o__Bdellovibrionales	f__Bacteriovoracaceae	g__Peredibacter	s__unclassified_g__Peredibacter	OTU264	2	3	3	4	3	0	5	4	2	3	0	0	0	0	0	0	0	0	2	0	0	0	0	0	0	0	0	0	0	0
d__Bacteria	k__norank_d__Bacteria	p__Proteobacteria	c__Gammaproteobacteria	o__Betaproteobacteriales	f__Nitrosomonadaceae	g__Nitrosomonas	s__unclassified_g__Nitrosomonas	OTU253	3	4	5	5	2	2	7	6	0	11	0	0	0	0	0	0	0	0	2	0	0	0	0	0	0	0	0	0	0	0
d__Bacteria	k__norank_d__Bacteria	p__Verrucomicrobia	c__Verrucomicrobiae	o__Verrucomicrobiales	f__Akkermansiaceae	g__Akkermansia	s__unclassified_g__Akkermansia	OTU378	10	21	21	130	22	15	43	47	15	12	1	0	0	0	0	0	0	0	0	0	0	0	0	0	0	0	0	0	1	0
d__Bacteria	k__norank_d__Bacteria	p__Bacteroidetes	c__Bacteroidia	o__Sphingobacteriales	f__Sphingobacteriaceae	g__Nubsella	s__unclassified_g__Nubsella	OTU242	1	3	2	11	0	0	2	0	4	6	0	0	0	0	0	0	0	0	2	0	0	0	0	0	0	0	0	0	0	0
d__Bacteria	k__norank_d__Bacteria	p__Bacteroidetes	c__Bacteroidia	o__Bacteroidales	f__Muribaculaceae	g__norank_f__Muribaculaceae	s__unclassified_g__norank_f__Muribaculaceae	OTU713	0	1	3	0	0	3	1	1	2	0	0	0	1	0	0	0	1	0	0	0	0	0	0	0	0	0	0	0	0	0
d__Bacteria	k__norank_d__Bacteria	p__Firmicutes	c__Clostridia	o__Clostridiales	f__Lachnospiraceae	g__unclassified_f__Lachnospiraceae	s__unclassified_f__Lachnospiraceae	OTU358	1	3	1	0	4	0	0	2	0	0	0	0	0	0	0	0	0	0	0	0	1	0	0	0	0	1	0	0	0	0
d__Bacteria	k__norank_d__Bacteria	p__Proteobacteria	c__Gammaproteobacteria	o__Pseudomonadales	f__Moraxellaceae	g__Acinetobacter	s__Acinetobacter_lwoffii	OTU227	0	0	1	0	1	0	2	2	0	1	0	0	0	0	0	0	0	0	2	0	0	0	0	0	0	0	0	0	0	0
d__Bacteria	k__norank_d__Bacteria	p__Proteobacteria	c__Gammaproteobacteria	o__Betaproteobacteriales	f__Burkholderiaceae	g__Alcaligenes	s__unclassified_g__Alcaligenes	OTU436	35	33	37	75	28	19	17	30	8	20	0	0	0	1	0	0	1	0	0	0	0	0	0	0	0	0	0	0	0	0
d__Bacteria	k__norank_d__Bacteria	p__Tenericutes	c__Mollicutes	o__Mollicutes_RF39	f__norank_o__Mollicutes_RF39	g__norank_f__norank_o__Mollicutes_RF39	s__uncultured_bacterium_g__norank_f__norank_o__Mollicutes_RF39	OTU160	12	8	3	8	2	6	2	1	2	1	0	0	1	1	0	0	0	0	0	0	0	0	0	0	0	0	0	0	0	0
d__Bacteria	k__norank_d__Bacteria	p__Firmicutes	c__Bacilli	o__Bacillales	f__Staphylococcaceae	g__Jeotgalicoccus	s__uncultured_bacterium_g__Jeotgalicoccus	OTU285	37	28	107	37	57	86	65	87	77	21	0	0	0	0	0	0	1	0	0	0	0	0	0	1	0	0	0	0	0	0
d__Bacteria	k__norank_d__Bacteria	p__Chloroflexi	c__JG30-KF-CM66	o__norank_c__JG30-KF-CM66	f__norank_o__norank_c__JG30-KF-CM66	g__norank_f__norank_o__norank_c__JG30-KF-CM66	s__metagenome_g__norank_f__norank_o__norank_c__JG30-KF-CM66	OTU261	1090	761	1442	188	689	14	20	157	1	194	0	0	0	0	0	0	0	0	2	0	0	0	0	0	0	0	0	0	0	0
d__Bacteria	k__norank_d__Bacteria	p__Firmicutes	c__Clostridia	o__Clostridiales	f__Lachnospiraceae	g__Coprococcus_2	s__unclassified_g__Coprococcus_2	OTU228	58	114	28	54	39	78	4	2	17	3	0	0	0	0	0	0	0	0	2	0	0	0	0	0	0	0	0	0	0	0
d__Bacteria	k__norank_d__Bacteria	p__Firmicutes	c__Clostridia	o__Clostridiales	f__Ruminococcaceae	g__Ruminococcaceae_UCG-013	s__unclassified_g__Ruminococcaceae_UCG-013	OTU459	9	11	5	3	4	0	3	7	0	0	0	0	0	1	0	0	0	1	0	0	0	0	0	0	0	0	0	0	0	0
d__Bacteria	k__norank_d__Bacteria	p__Bacteroidetes	c__Bacteroidia	o__Flavobacteriales	f__Flavobacteriaceae	g__Myroides	s__Myroides_odoratus	OTU287	0	0	0	0	0	0	0	1	0	1	0	0	0	1	0	0	1	0	0	0	0	0	0	0	0	0	0	0	0	0
d__Bacteria	k__norank_d__Bacteria	p__GAL15	c__norank_p__GAL15	o__norank_c__norank_p__GAL15	f__norank_o__norank_c__norank_p__GAL15	g__norank_f__norank_o__norank_c__norank_p__GAL15	s__uncultured_bacterium_g__norank_f__norank_o__norank_c__norank_p__GAL15	OTU240	0	1	0	0	1	0	0	1	0	0	0	0	0	0	0	0	0	0	2	0	0	0	0	0	0	0	0	0	0	0
d__Bacteria	k__norank_d__Bacteria	p__unclassified_k__norank_d__Bacteria	c__unclassified_k__norank_d__Bacteria	o__unclassified_k__norank_d__Bacteria	f__unclassified_k__norank_d__Bacteria	g__unclassified_k__norank_d__Bacteria	s__unclassified_k__norank_d__Bacteria	OTU322	0	0	0	0	0	0	0	0	0	1	0	1	0	0	0	0	0	0	0	0	0	0	0	0	0	1	0	0	0	0
d__Bacteria	k__norank_d__Bacteria	p__Cyanobacteria	c__Oxyphotobacteria	o__Chloroplast	f__norank_o__Chloroplast	g__norank_f__norank_o__Chloroplast	s__Phaseolus_vulgaris	OTU599	469	283	581	123	335	9	14	77	1	95	0	0	0	0	0	0	0	0	0	0	0	0	0	0	0	1	1	0	0	0
d__Bacteria	k__norank_d__Bacteria	p__Bacteroidetes	c__Bacteroidia	o__Bacteroidales	f__Muribaculaceae	g__norank_f__Muribaculaceae	s__unclassified_g__norank_f__Muribaculaceae	OTU87	2	1	8	8	4	0	0	0	1	14	0	0	0	0	0	0	0	0	0	0	0	0	0	0	0	2	0	0	0	0
d__Bacteria	k__norank_d__Bacteria	p__unclassified_k__norank_d__Bacteria	c__unclassified_k__norank_d__Bacteria	o__unclassified_k__norank_d__Bacteria	f__unclassified_k__norank_d__Bacteria	g__unclassified_k__norank_d__Bacteria	s__unclassified_k__norank_d__Bacteria	OTU619	0	0	0	0	0	0	0	0	0	0	0	0	1	0	0	0	0	0	0	0	0	1	0	0	0	0	0	0	0	0
d__Bacteria	k__norank_d__Bacteria	p__Tenericutes	c__Mollicutes	o__Mollicutes_RF39	f__norank_o__Mollicutes_RF39	g__norank_f__norank_o__Mollicutes_RF39	s__unclassified_g__norank_f__norank_o__Mollicutes_RF39	OTU623	54	21	11	13	28	0	10	19	1	9	0	0	0	0	0	0	0	0	0	0	1	0	0	0	0	0	0	0	0	1
d__Bacteria	k__norank_d__Bacteria	p__Firmicutes	c__Clostridia	o__Clostridiales	f__Christensenellaceae	g__norank_f__Christensenellaceae	s__uncultured_bacterium_g__norank_f__Christensenellaceae	OTU454	11	0	49	4	21	0	2	12	0	1	0	0	0	0	0	0	0	1	0	1	0	0	0	0	0	0	0	0	0	0
d__Bacteria	k__norank_d__Bacteria	p__unclassified_k__norank_d__Bacteria	c__unclassified_k__norank_d__Bacteria	o__unclassified_k__norank_d__Bacteria	f__unclassified_k__norank_d__Bacteria	g__unclassified_k__norank_d__Bacteria	s__unclassified_k__norank_d__Bacteria	OTU671	12	1	15	1	8	7	6	0	25	5	0	0	0	0	0	0	0	0	0	1	0	0	0	0	1	0	0	0	0	0
d__Bacteria	k__norank_d__Bacteria	p__Proteobacteria	c__Alphaproteobacteria	o__Rhizobiales	f__Rhizobiales_Incertae_Sedis	g__norank_f__Rhizobiales_Incertae_Sedis	s__unclassified_g__norank_f__Rhizobiales_Incertae_Sedis	OTU244	42	40	48	49	35	60	15	20	53	17	0	0	0	0	0	0	0	0	2	0	0	0	0	0	0	0	0	0	0	0
d__Bacteria	k__norank_d__Bacteria	p__Firmicutes	c__Bacilli	o__Bacillales	f__Bacillaceae	g__Bacillus	s__unclassified_g__Bacillus	OTU224	0	0	0	1	0	0	0	0	1	0	0	0	0	0	0	0	0	0	2	0	0	0	0	0	0	0	0	0	0	0
d__Bacteria	k__norank_d__Bacteria	p__Bacteroidetes	c__Bacteroidia	o__Bacteroidales	f__Muribaculaceae	g__norank_f__Muribaculaceae	s__uncultured_Bacteroidales_bacterium_g__norank_f__Muribaculaceae	OTU743	25	30	51	35	45	75	53	11	65	10	0	0	0	0	0	0	0	0	0	0	0	0	0	0	0	0	0	0	0	2
d__Bacteria	k__norank_d__Bacteria	p__Bacteroidetes	c__Bacteroidia	o__Bacteroidales	f__Muribaculaceae	g__norank_f__Muribaculaceae	s__unclassified_g__norank_f__Muribaculaceae	OTU900	29	25	34	15	13	6	27	35	4	35	0	0	0	0	0	0	0	0	0	0	1	0	0	0	0	0	1	0	0	0
d__Bacteria	k__norank_d__Bacteria	p__Bacteroidetes	c__Bacteroidia	o__Bacteroidales	f__Prevotellaceae	g__Alloprevotella	s__uncultured_Bacteroidales_bacterium_g__Alloprevotella	OTU959	102	58	116	7	42	0	1	7	0	8	0	0	0	0	0	0	0	0	0	0	0	0	0	1	1	0	0	0	0	0
d__Bacteria	k__norank_d__Bacteria	p__Bacteroidetes	c__Bacteroidia	o__Bacteroidales	f__Muribaculaceae	g__norank_f__Muribaculaceae	s__unclassified_g__norank_f__Muribaculaceae	OTU415	0	2	5	11	5	0	0	0	2	1	0	0	0	0	0	0	1	0	0	0	0	0	0	0	0	0	0	1	0	0
d__Bacteria	k__norank_d__Bacteria	p__Firmicutes	c__Clostridia	o__Clostridiales	f__Ruminococcaceae	g__Ruminococcaceae_UCG-014	s__uncultured_bacterium_g__Ruminococcaceae_UCG-014	OTU969	2	0	0	0	0	6	38	876	3	157	0	0	0	0	0	0	0	0	1	0	0	0	0	0	0	0	0	0	0	1
d__Bacteria	k__norank_d__Bacteria	p__Tenericutes	c__Mollicutes	o__Mollicutes_RF39	f__norank_o__Mollicutes_RF39	g__norank_f__norank_o__Mollicutes_RF39	s__uncultured_bacterium_g__norank_f__norank_o__Mollicutes_RF39	OTU979	17	137	634	1599	102	201	444	201	101	323	0	0	0	1	1	0	0	0	0	0	0	0	0	0	0	0	0	0	0	0
d__Bacteria	k__norank_d__Bacteria	p__Firmicutes	c__Clostridia	o__Clostridiales	f__Ruminococcaceae	g__norank_f__Ruminococcaceae	s__unclassified_g__norank_f__Ruminococcaceae	OTU545	209	34	166	9	225	0	61	234	2	61	1	0	0	0	0	1	0	0	0	0	0	0	0	0	0	0	0	0	0	0
d__Bacteria	k__norank_d__Bacteria	p__Proteobacteria	c__Gammaproteobacteria	o__Pseudomonadales	f__Pseudomonadaceae	g__Pseudomonas	s__Pseudomonas_fragi	OTU516	0	1	0	0	0	0	0	5	0	1	0	0	0	0	0	0	0	0	0	0	0	0	0	0	0	0	1	0	0	1
d__Bacteria	k__norank_d__Bacteria	p__Firmicutes	c__Bacilli	o__Lactobacillales	f__Carnobacteriaceae	g__Trichococcus	s__unclassified_g__Trichococcus	OTU882	201	214	94	33	121	0	20	82	0	37	0	0	0	0	0	0	0	0	0	0	0	0	0	0	0	0	1	0	0	0
d__Bacteria	k__norank_d__Bacteria	p__Firmicutes	c__Clostridia	o__Clostridiales	f__Lachnospiraceae	g__Roseburia	s__unclassified_g__Roseburia	OTU288	26	22	20	11	10	1	4	2	0	1	0	0	0	0	0	0	0	0	0	0	0	0	0	0	0	0	0	1	0	0
d__Bacteria	k__norank_d__Bacteria	p__Bacteroidetes	c__Bacteroidia	o__Bacteroidales	f__Muribaculaceae	g__unclassified_f__Muribaculaceae	s__unclassified_f__Muribaculaceae	OTU938	0	0	0	0	0	0	0	0	0	0	0	0	0	0	0	0	0	0	0	0	0	0	0	0	0	0	0	1	0	0
d__Bacteria	k__norank_d__Bacteria	p__Bacteroidetes	c__Bacteroidia	o__Bacteroidales	f__Rikenellaceae	g__DMER64	s__uncultured_bacterium_g__DMER64	OTU698	40	4	56	1	36	2	7	21	0	2	0	0	0	0	0	1	0	0	0	0	0	0	0	0	0	0	0	0	0	0
d__Bacteria	k__norank_d__Bacteria	p__Bacteroidetes	c__Bacteroidia	o__Bacteroidales	f__unclassified_o__Bacteroidales	g__unclassified_o__Bacteroidales	s__unclassified_o__Bacteroidales	OTU1055	0	0	0	0	0	0	0	0	0	0	0	0	0	0	0	0	0	0	0	0	0	0	0	0	0	0	0	0	0	1
d__Bacteria	k__norank_d__Bacteria	p__Bacteroidetes	c__Bacteroidia	o__Bacteroidales	f__Muribaculaceae	g__norank_f__Muribaculaceae	s__uncultured_bacterium_g__norank_f__Muribaculaceae	OTU810	197	357	288	163	210	348	254	88	212	76	0	0	1	0	0	0	0	0	0	0	0	0	0	0	0	0	0	0	0	0
d__Bacteria	k__norank_d__Bacteria	p__Epsilonbacteraeota	c__Campylobacteria	o__Campylobacterales	f__Helicobacteraceae	g__Helicobacter	s__unclassified_g__Helicobacter	OTU740	0	0	0	0	0	0	0	0	0	0	0	0	0	0	0	0	0	0	0	0	0	0	1	0	0	0	0	0	0	0
d__Bacteria	k__norank_d__Bacteria	p__Bacteroidetes	c__Bacteroidia	o__Bacteroidales	f__Prevotellaceae	g__Alloprevotella	s__uncultured_Bacteroidales_bacterium_g__Alloprevotella	OTU816	0	3	41	3	0	2	4	7	0	20	0	0	0	0	0	0	0	0	0	0	0	0	0	0	0	0	1	0	0	0
d__Bacteria	k__norank_d__Bacteria	p__Bacteroidetes	c__Bacteroidia	o__Bacteroidales	f__Muribaculaceae	g__norank_f__Muribaculaceae	s__unclassified_g__norank_f__Muribaculaceae	OTU1008	4	9	3	3	0	0	1	1	1	0	0	0	0	0	0	0	0	0	0	1	0	0	0	0	0	0	0	0	0	0
d__Bacteria	k__norank_d__Bacteria	p__Bacteroidetes	c__Bacteroidia	o__Bacteroidales	f__Muribaculaceae	g__norank_f__Muribaculaceae	s__unclassified_g__norank_f__Muribaculaceae	OTU901	0	0	4	8	0	0	1	4	2	4	0	0	0	0	0	0	0	0	0	0	0	1	0	0	0	0	0	0	0	0
d__Bacteria	k__norank_d__Bacteria	p__Bacteroidetes	c__Bacteroidia	o__Bacteroidales	f__unclassified_o__Bacteroidales	g__unclassified_o__Bacteroidales	s__unclassified_o__Bacteroidales	OTU1061	0	0	0	0	0	8	11	2	3	17	0	1	0	0	0	0	0	0	0	0	0	0	0	0	0	0	0	0	0	0
d__Bacteria	k__norank_d__Bacteria	p__Bacteroidetes	c__Bacteroidia	o__Bacteroidales	f__Muribaculaceae	g__norank_f__Muribaculaceae	s__uncultured_bacterium_g__norank_f__Muribaculaceae	OTU84	0	0	0	0	0	0	0	0	0	0	0	0	0	0	0	0	0	0	0	0	0	0	0	0	1	0	0	0	0	0
d__Bacteria	k__norank_d__Bacteria	p__Firmicutes	c__Clostridia	o__Clostridiales	f__Ruminococcaceae	g__Ruminiclostridium_6	s__uncultured_bacterium_g__Ruminiclostridium_6	OTU424	2	0	0	1	0	0	0	0	0	0	0	0	0	0	0	0	0	0	0	0	0	0	0	0	0	0	0	0	1	0
d__Bacteria	k__norank_d__Bacteria	p__Firmicutes	c__Clostridia	o__Clostridiales	f__Lachnospiraceae	g__unclassified_f__Lachnospiraceae	s__unclassified_f__Lachnospiraceae	OTU670	0	0	0	48	0	1	1	0	1	0	0	0	0	0	0	0	0	0	0	0	0	0	1	0	0	0	0	0	0	0
d__Bacteria	k__norank_d__Bacteria	p__Firmicutes	c__Clostridia	o__Clostridiales	f__unclassified_o__Clostridiales	g__unclassified_o__Clostridiales	s__unclassified_o__Clostridiales	OTU981	2	5	0	0	0	3	0	1	1	1	0	0	0	0	0	0	0	0	0	0	0	1	0	0	0	0	0	0	0	0

## Sheet: Sheet2
Name	CPL1	CPL2	CPL3	CPL4	CPL5	CHS1	CHS2	CHS3	CHS4	CHS5	unit
Asparagine	784.128	1502.57	1135.83	881.96	1049.13	32923.7	21064.8	3400.94	13201.1	25383.9	ng/g
Cystine	252.335	233.933	265.348	209.1	328.676	4769.81	3991.71	2230.73	4195.21	4777.83	ng/g
N-Acetylmethionine	438.208	547.836	210.374	528.293	492.057	1581.46	3959.72	3285.94	3544.39	5079.42	ng/g
Histidine	8791.37	12422.2	10914.6	10737.7	10444.2	71780.9	70984.1	49637.6	89305.4	85203.5	ng/g
Glutamine	31047.4	30830.6	28950.9	29956.3	27557.3	204042	198777	142038	224165	235472	ng/g
Glycylleucine	239.364	339.104	346.685	249.888	372.984	2037.59	1741.37	836.878	1777.11	2076.79	ng/g
Proline	17977.8	21124.3	22275.5	17023	21280.9	90877.5	81313.2	61927.1	127661	100552	ng/g
Glycylproline	393.75	396.869	324.276	394.738	459.124	1597.77	1458.26	1102.54	1660.21	1774.22	ng/g
Gamma-Aminobutyric acid	1300.33	1440.25	1401.43	1521.15	1654.85	4686.4	4447.59	3396.47	4646.3	7025.7	ng/g
Tyrosine	97375.8	124756	119482	106394	107867	366907	357230	220597	445353	406279	ng/g
Arginine	20858.7	30325.4	23678.9	24950.6	20782.1	82231.6	78404.8	49738.9	81847.9	91157.1	ng/g
Norleucine	100026	150194	128516	121767	132050	410389	385560	285703	447068	457451	ng/g
Trimethyllysine	42890.4	58567.3	52260.6	55319	41472.3	174585	171781	111224	155339	164704	ng/g
Alloisoleucine	35994.1	52854	43418.1	43696.8	43040.6	141470	127811	99608.6	144141	147504	ng/g
Asymmetric dimethylarginine	241311	218835	239806	232518	216521	685152	680818	522073	823048	751892	ng/g
Alpha-aminobutyric acid	7293.34	9828.31	8716.09	8455.04	9315.56	26145.1	25443.4	18062.9	29854.6	30372.5	ng/g
Ornithine	186.563	224.689	184.301	198.584	165.673	584.697	601.297	417.316	627.276	621.555	ng/g
Glycine	30159.8	44248.7	35803.9	31794.7	38681.9	108310	105528	75211.2	129501	112898	ng/g
Isoleucine	42434.7	59404.8	48475.3	46899	50427.2	147260	131850	107463	153466	159139	ng/g
Leucine	52468.8	81526.6	63755.7	63641.8	68649.6	194112	173793	140135	207153	209035	ng/g
Homoserine	33129.8	45193.7	38337.6	36263	36469.9	105565	99117.2	77231	123775	123866	ng/g
2,6-Diaminopimelic acid	1603.12	1841.98	1870.65	2059.02	1709.57	4966.24	5202.93	4373.44	5899.49	4877.96	ng/g
Threonine	20028.5	26925.1	24647.4	20398.1	21625.1	63619	60512.6	46373.1	71933.9	74112	ng/g
Serine	27033.1	22911.3	26724.4	22904	25275.2	69105.3	71198.8	60086.2	68509.2	73842.9	ng/g
Phenylalanine	3.91912e+06	5.62132e+06	4.8238e+06	4.59005e+06	4.8347e+06	1.35601e+07	1.23282e+07	9.72799e+06	1.40693e+07	1.48056e+07	ng/g
Methionine	73448.4	99778.9	96517.7	83915.3	89410.2	233665	237508	147266	297751	275398	ng/g
Aspartic acid	23353.3	39383.2	38051.6	28453.9	30254.8	80328.2	88451.7	48940.3	108565	90911.9	ng/g
Leucyl-Glycine	852.468	1041.58	751.066	717.269	1072.66	2493.75	2140.7	1156.58	1824.26	3768.69	ng/g
N-Methylalanine	20127.7	26399.4	27745.1	25871.2	24703	55997.6	65504.1	41215.4	69816.7	73411.6	ng/g
Norvaline	96668.8	126438	124658	106425	104838	267983	263309	184398	342323	289765	ng/g
Valine	58087.5	74665.1	76545.7	67855	65876.3	155140	156504	116043	207456	175815	ng/g
Lysine	190366	253958	245119	237524	240651	548580	511368	439852	646696	604144	ng/g
N-Acetylalanine	889.193	1131.96	977.178	1026.15	1110.93	2337.58	2266.08	1793.15	2569.99	2620.84	ng/g
Cystathionine	11293.6	12137.8	10148.5	13591.3	12729.7	27159.7	31271.7	23701	19946.8	24286.7	ng/g
N-Acetylaspartic acid	1027.11	997.706	892.162	889.797	1009.5	1978.11	1930.9	1514.8	2136.82	2229.09	ng/g
Acetylcysteine	6499.93	6499.93	4267.55	6499.93	6499.93	8732.31	7051.99	5373.19	9751.12	9052.67	ng/g
Citrulline	58301	61058.2	64733.5	62393	70220.5	106336	104014	93624.3	144546	131167	ng/g
N-Acetylleucine	5.45258	7.8795	4.56565	5.45258	3.91259	7.11421	11.539	9.56509	8.67323	9.22	ng/g
Homocysteine	27463.4	32761.1	28854.2	38262.8	40419.7	55094.9	48797.8	42647.4	73579.2	58650.1	ng/g
2-Aminoisobutyric acid	50123	67029.7	58897.2	61781.8	66747.1	89570.6	96626.5	89762.3	93222.3	96874.8	ng/g
Gama-glutamylalanine	4211.15	5024.38	4954.94	4458.08	5332.7	5840.89	7235.97	5283.02	8230.27	8320.34	ng/g
Pipecolic acid	894.639	975.808	1006.17	1004.09	1038.89	1483.93	1474.11	1174.07	1564.1	1453.41	ng/g
Alanine	110355	129672	120446	115477	126511	150331	148941	153038	167842	147249	ng/g
Beta-Alanine	111937	149626	130104	127342	141710	163880	158072	166453	182164	156175	ng/g
Sarcosine	106322	136971	120290	117709	135544	153982	149015	153942	169113	145704	ng/g
Homocysteine thiolactone	10123.1	10411.6	9183.36	11372.6	9524.91	14885.3	10743.2	10198	11942.1	11942.1	ng/g
cis-4-Hydroxy-D-proline	172861	181867	185121	171493	191971	208838	210767	223887	194284	225301	ng/g
3-Methylhistidine	811.783	951.139	918.913	1182.39	1069.75	1084.05	1134.85	853.251	1338.36	1254.8	ng/g
Creatinine	1191.64	1544.59	1304.55	1203.96	1447.68	1588.55	1645.52	1650.06	1113.83	1393.7	ng/g
Nicotinuric acid	3156.01	3214.77	3172.13	3373.13	2260.34	3143.87	3478.29	3748.98	3159.77	3219.7	ng/g
Thyronine	16110	16508.1	20025.5	23388.9	17687.6	23107.5	18553.6	21675.3	19468.1	19225.5	ng/g
Glutamic acid	519822	547523	562781	516599	521490	559825	589871	461697	677053	581990	ng/g
4-Guanidinobutanoic acid	413758	469035	485727	454476	458290	483351	450174	425486	621704	467760	ng/g
Creatine	1213.31	1543.98	1384.36	1182.42	1544.12	1605.33	1654.94	1615.74	1072.83	1420.07	ng/g
5-Aminopentanoic acid	540452	612280	681076	586197	632567	709419	687024	525573	615009	656951	ng/g
N-Alpha-acetyllysine	18330.3	21332.6	22744.8	22802.8	23880.5	18354.2	21937.6	19516.5	27476.2	25577.2	ng/g
4,5-Dihydroorotic acid	2205.96	1608.32	1734.91	1707.5	1449.47	1629.96	1732.99	1982.22	2099.56	1411.54	ng/g
Cysteic acid	2653.2	2512.39	2810.76	2589.23	2803.14	2336.41	2264.16	2554.83	2319.93	2612.42	ng/g
Homocitrulline	1397.16	1269.19	1499.84	1243.4	1732.9	891.535	1177.89	1027.02	1518.48	1305.68	ng/g
Hydroxyproline	1413.68	1543.49	1487.91	1497.36	1604.82	1208.02	1230.69	1346.95	1122	1124.12	ng/g
N-Acetylphenylalanine	29.2121	36.1914	36.5568	44.0349	23.2652	23.9053	25.4406	21.5687	40.7761	20.848	ng/g
S-Carboxymethyl-cysteine	71033.2	79306.4	71395.3	69566	84852.4	52905.6	60550.6	57364.2	53226.4	62774.1	ng/g
N-Acetylglutamic acid	59980.5	75711.2	78096.4	67568	74207.7	45051.9	66586.4	44796.4	63630.8	50546.9	ng/g
N-methyl-glutamic acid	25077.3	34089.1	31297.1	39141.6	41401.4	15849.5	17745.6	16298.3	12641.1	18810.7	ng/g
Ophthalmic acid	4208.98	3403.65	3628.76	3228.72	4783.2	1700.3	2027.74	1441.74	1358.03	2004.8	ng/g
N-Methyl-aspartic acid	29570.6	36237.4	39841.1	44058.6	41829.4	6009.62	7698.03	9314	9911.65	14311.2	ng/g
Tryptophan	14435.9	21263.3	18365.6	16553.2	17688	44347.6	40859.4	27543.6	42726	41954.5	ng/g
Histamine	4469.73	4863.93	7206.46	4764.37	8151.29	3469.64	2901.32	3984.31	2761.71	2923.63	ng/g
4Z,7Z,10Z,13Z,16Z,19Z-Docosahexaenoic Acid (DHA)	12698.6	10626.8	11134.9	7733.22	10864.3	57927.2	48961.5	39510.2	43388.3	48877.4	ng/g
5Z,8Z,11Z,14Z,17Z-Eicosapentaenoic Acid	55177.2	46456.7	41763.5	39468.1	46221.2	148026	177363	146076	145640	213358	ng/g
Dihomo-gamma-linolenic acid	151219	101575	138767	82918.6	138615	517138	416183	329132	307754	392569	ng/g
Erucic Acid	133970	155898	183558	139735	221451	535612	539383	360955	516515	562273	ng/g
Arachidonic acid	92438.5	72444.7	72747.1	51784.8	80909.7	255613	220200	195261	205829	229025	ng/g
11Z,14Z,17Z-Eicosatrienoic Acid	665446	540982	649628	507003	687843	2.05375e+06	1.52507e+06	1.23443e+06	1.39273e+06	1.68271e+06	ng/g
Arachidic Acid	296181	624378	807725	585561	776617	1.56791e+06	1.46467e+06	1.16214e+06	1.29891e+06	1.38914e+06	ng/g
5Z-Dodecenoic acid	1292.67	1178.03	1146.69	1305.25	1306.23	2698.21	2626.74	2121.33	3165.56	3127.91	ng/g
Myristelaidic acid	11094.5	20498.6	21114.2	21790	24343.8	38814.3	44187.5	29893.2	47308.3	49504.3	ng/g
Docosanoic Acid	165241	154070	186401	148581	171910	392397	356724	273011	282240	374295	ng/g
Lignoceric Acid	10557.1	21190.3	32391.1	21535.7	26484.7	48603.2	57061.3	37694.7	36189.5	42675.5	ng/g
7Z,10Z,13Z,16Z-Docosatetraenoic acid	775554	664357	780027	643348	857497	2.17252e+06	1.47194e+06	1.14656e+06	1.05535e+06	1.44111e+06	ng/g
Heptadecanoic acid	41937	53312.8	62924	57537.6	65147.9	112183	109692	78773.9	108588	109152	ng/g
Palmitic acid	1.04412e+06	805553	910849	853661	893244	1.89989e+06	1.64083e+06	1.43145e+06	1.3718e+06	1.62382e+06	ng/g
Stearic acid	492862	792729	1.21431e+06	909209	1.11559e+06	1.85473e+06	1.48204e+06	1.53741e+06	1.62868e+06	1.43997e+06	ng/g
Oxoadipic acid	171.372	149.166	48.2365	144.002	107.796	55.17	177.891	284.51	146.232	424.168	ng/g
Tricosanoic acid	56540.6	73242.7	82683.4	84248.6	92353.1	116400	166626	116601	135871	142620	ng/g
11Z-Eicosenoic Acid	1.19871e+07	8.28267e+06	1.01812e+07	9.3925e+06	8.46462e+06	1.79306e+07	1.77325e+07	1.52714e+07	1.44077e+07	1.78104e+07	ng/g
Tridecanoic acid	2430.03	2331.93	2430.03	2528.13	2430.03	2711.66	3746.99	3984.67	3251.28	5449.14	ng/g
Azelaic acid	389.557	366.662	107.619	425.871	453.435	195.273	721.145	673.065	461.146	612.435	ng/g
10Z-Pentadecenoic Acid	250777	314348	318161	316852	359424	436761	609713	356027	469031	486391	ng/g
10Z,13Z-Nonadecadienoic acid	384.222	262.044	299.199	238.598	257.548	534.862	457.387	443.615	341.39	401.316	ng/g
Elaidic Acid	122939	95438.6	111674	85164.3	98189.5	163294	157182	147961	143483	148773	ng/g
Oleic acid	101171	67668.3	83744.7	67264.4	66801.8	118122	119619	108920	105927	112616	ng/g
13Z,16Z-Docosadienoic Acid	2122.12	1456.86	2014.2	1339.03	1804.6	3056.68	2554.22	1985.73	2554.22	2620.24	ng/g
Petroselinic acid	123528	95548.4	104225	87910.5	93949	152654	155185	140844	128977	149957	ng/g
Linoleic acid	91398.6	81373.6	79075.9	68652.1	67762.7	117882	122388	100988	105702	110107	ng/g
10E-Heptadecenoic acid	5563.22	2969	3878.08	2474.28	2627.3	5013.93	5947.41	4392.19	4270.29	4748.75	ng/g
Linoelaidic acid	86379.5	60932.2	71288.3	47865.5	60180.1	87857.7	97447.2	96400.7	75389.1	84743.6	ng/g
12Z-Tridecenoic acid	4686	4686	4859.14	4686	4512.86	6685.2	6722.9	5119.45	7079.07	5650.66	ng/g
Conjugated linoleic acids (CLA)	100852	77472	83437.9	66427.1	77601.5	106058	108404	117583	96074.4	109227	ng/g
10Z-Nonadecaenoic acid	3160.04	2158.42	2271.08	1728.98	1829.38	3065.04	3458.03	2410.58	2595.55	2471.26	ng/g
Myristic acid	416160	347719	448498	475144	394592	585812	499020	600945	418319	415382	ng/g
10Z-Heptadecenoic acid	2744.89	1317.5	1896.04	1289.03	1367.39	2196.37	2457.36	1727.97	2001.97	2032.08	ng/g
Suberic acid	54.7271	53.3686	69.7637	86.2277	83.7943	69.7545	103.066	91.8761	71.6678	80.8698	ng/g
3-Methyl-2-oxobutanoic acid	563.997	720.399	258.652	591.314	615.076	219.07	634.582	675.892	838.492	811.482	ng/g
2-Hydroxycaproic acid	449.77	880.013	633.39	449.247	625.229	570.606	475.581	847.058	642.952	758.012	ng/g
Alpha-Linolenic Acid	71738.4	61178.5	47124.7	59124.1	50573.9	45702.2	69960.7	73516.7	37615	61948.9	ng/g
Sebacic acid	4823.42	4806.02	4443.27	5952.05	6370.2	4506.62	5168.23	6555.38	4207.86	5024.07	ng/g
Gamma-Linolenic acid	30786.3	27441.2	23772	21964.4	21570.5	15258.6	28564.7	34512.6	18537.2	24195.2	ng/g
2-Hydroxy-3-methylbutyric acid	615.845	711.421	228.177	579.829	552.031	147.367	383.684	438.778	592.663	498.826	ng/g
Palmitoleic Acid	151183	75169.3	89216.3	85575.3	55458.4	76376.1	79735.9	72654.3	31099.1	38543.9	ng/g
Palmitelaidic acid	285291	125973	181185	152695	112824	138384	139597	126656	71468.4	64080.8	ng/g
12-hydroxystearic acid	8523.09	7812.66	8960.44	9378	9229.84	4314.63	5932.36	4349.62	5202.55	6143.84	ng/g
Ricinoleic acid	272.322	255.748	235.063	229.103	220.329	114.555	145.47	227.666	98.9662	111.691	ng/g
Hexanoic acid	338331	158681	75034.4	137602	90869.2	20281.4	59281	138715	55625.5	41601.3	ng/g
Methylmalonic acid	6569.73	5831.3	6427.93	6218.63	6878.85	4498.82	9839.47	3912.19	8978.94	6644.77	ng/g
2-Butenoic acid	2163.87	2907.75	2333.46	2983.31	2748.82	873.194	2205.02	1968.69	1468.95	1566.06	ng/g
2-Hydroxybutyric acid	2550.99	2085.55	2844.11	2428.92	2149.91	1950.41	2138.05	1614.2	2050.63	2823.38	ng/g
D-2-Hydroxyglutaric acid	12565.3	15641.1	15911.3	16041.6	15804.9	7974.96	8331.6	5866.33	11881.1	9092.65	ng/g
Hydroxyisocaproic acid	761320	835873	685674	743963	706345	659563	623006	607391	1.00877e+06	833582	ng/g
3-Hydroxyisovaleric acid	1128.08	1018.84	1084.25	1028.2	1095.24	735.345	892.085	1007.56	885.02	778.841	ng/g
Alpha-Hydroxyisobutyric acid	3825.37	2475.26	2124.91	2855.58	2553.65	2177.24	2340.31	2062.74	2485.18	3444.72	ng/g
3-Hydroxybutyric acid	3926.77	3775.83	3580.4	4371.15	4690.07	1811.07	2112.4	2541.57	1321.83	2048.75	ng/g
Glutaric acid	795.201	1043.9	1042.63	959.81	1092.79	778.025	812.397	710.514	1149.13	1037.07	ng/g
2'-Deoxyadenosine 5'-monophosphate(dAMP)	9448.24	9093.98	6966.59	5755.06	9147.15	89890.5	96879	69602.5	63348.8	46663.8	ng/g
Cytidine monophosphate（CMP)	176.303	271.105	377.008	131.237	238.913	880.347	1269.37	548.278	3800.8	2144.58	ng/g
S-Adenosylmethionine	104845	79128.5	108230	81388	57959.5	368716	441348	329776	529784	810560	ng/g
Nicotinamide ribotide	59.6681	55.1838	42.6019	63.1181	59.8314	242.941	307.403	86.5903	412.127	470.089	ng/g
Thymideine-monophosphate(dTMP)	23046	18343.9	15383.7	14712.2	22102	122251	127238	91885.8	89002.5	62643.6	ng/g
AICAR	1295.52	3506.35	2631.7	5293.69	4227.88	17944.7	14267.3	6944.49	15118.1	18188.6	ng/g
5'-Methylthioadenosine	21.2464	19.1598	9.93426	24.1093	13.5274	17.2469	56.9368	66.3012	63.6349	100.68	ng/g
Thymidine	50746.2	57188.6	68854.4	55666	66370.7	212058	192172	128430	280115	190852	ng/g
Orotic acid	60416.7	62147.1	61430.3	60552.4	74845.5	162092	196066	126695	164681	168918	ng/g
7-methylguanosine	21004.9	19063.5	18201.3	19174.7	18163.7	44180.9	47458.6	35229.6	37443	54636.6	ng/g
Guanosine	395682	479328	464912	596902	486700	1.02444e+06	1.1996e+06	753949	935765	1.34765e+06	ng/g
Ribonolactone	228.399	217.729	79.2468	267.431	200.445	186.203	513.231	451.863	450.191	526.524	ng/g
Deoxyuridine	380205	438356	543476	454204	589830	893368	982703	692949	1.40075e+06	876370	ng/g
Riboflavin-5′-monophosphate	275.87	356.424	325.159	417.966	504.612	553.499	771.365	241.018	638.965	1036.67	ng/g
Adenosine monophosphate （AMP）	137.435	229.411	219.47	291.586	247.372	393.029	384.404	329.47	281.083	487.722	ng/g
Uridine	1.34351e+06	1.46805e+06	1.65046e+06	1.66714e+06	1.71353e+06	2.39819e+06	2.21523e+06	1.88684e+06	2.77553e+06	2.7818e+06	ng/g
Hypoxanthine	8.92973e+06	9.66283e+06	9.61638e+06	9.53008e+06	1.00951e+07	1.4139e+07	1.39405e+07	1.28503e+07	1.52338e+07	1.56361e+07	ng/g
Deoxyguanosine	405068	389441	552671	376491	450163	561749	587564	453713	764507	566692	ng/g
Sepiapterin	773.451	708.415	747.38	760.513	625.789	1007.07	1092.42	750.261	1064.66	882.714	ng/g
Xanthine	2.09733e+06	2.53968e+06	2.28955e+06	2.24937e+06	2.51873e+06	2.93153e+06	2.7606e+06	2.55703e+06	2.38597e+06	2.15843e+06	ng/g
Inosine	828455	982338	839062	1.27232e+06	1.29837e+06	1.36044e+06	1.46474e+06	992103	946499	945939	ng/g
Citicoline	160.578	173.221	115.234	273.221	143.851	87.173	166.945	219.853	243.084	167.501	ng/g
Uracil	4.72801e+06	4.24343e+06	3.97706e+06	4.10711e+06	4.3826e+06	4.02514e+06	4.04821e+06	3.98124e+06	4.68761e+06	4.54639e+06	ng/g
N6-methyladenosine	4367.72	5503.83	4519.52	4859.27	5125.53	4611.01	5455.85	4435.25	3960.81	5718.33	ng/g
Guanine	4.02913e+07	3.16938e+07	4.20818e+07	3.69455e+07	3.6984e+07	4.53114e+07	3.62762e+07	3.5327e+07	3.87685e+07	3.01156e+07	ng/g
S-Adenosylhomocysteine	8.03353	7.05259	8.65366	8.45352	12.0318	8.3818	9.32839	8.18105	8.01399	9.6547	ng/g
Uric acid	171962	163836	132623	186140	183963	175056	173045	174051	144051	151948	ng/g
1-Methyladenosine	10306.2	9709.1	9142.61	13201.9	14423.2	10724.1	10965.7	12292.4	10661.1	10481.7	ng/g
Adenosine	370961	310561	251589	237367	265731	217002	221956	382009	268880	289830	ng/g
Thymine	104156	155729	156980	154169	138815	127231	132775	117739	170221	116983	ng/g
3-Dehydroshikimate	450.053	468.846	428.744	494.705	394.068	399.886	415.401	430.917	423.159	415.401	ng/g
Thiamine monophosphate	12971.8	17789.8	16639	18771.3	19436.6	12253.5	14924.7	10434.5	12131.9	19864.3	ng/g
Purine	2370.92	5770.01	3958.61	5890.62	3913.86	2384.23	2655.82	2728.88	4069.97	3980.84	ng/g
Deoxycytidine	46715.9	40372.9	53342.7	32717.7	50925.3	24326.2	34519.4	31851.4	34434.2	22041.9	ng/g
Flavin adenine dinucleotide(FAD)	28795.5	40625.5	34156.4	34577.3	39431	18637.3	26428.4	15122.8	26964.5	27914.5	ng/g
Xanthosine	15922.1	20443.6	15881	24371.9	24475.7	12929.8	16411.7	9685.41	8401.88	13396.6	ng/g
Deoxyadenosine	276968	238604	223588	173742	184235	73815	84721.8	161227	117024	78884.5	ng/g
Cytidine	95016.8	135780	142795	105385	151365	62781.8	35324.7	54988.7	42916.8	53038.9	ng/g
Lactose	15386.3	7347.89	9573.34	13868	11660	166113	264606	118544	198443	326756	ng/g
D-Fructose	8158.21	9046.65	11334.2	5951.08	12817.2	110676	137087	73707	87056.5	186903	ng/g
Raffinose	21142.7	14612.3	15066.4	16940.5	16940.5	147257	180639	76120.9	204228	233396	ng/g
Maltotriose	95252.8	101680	99643.9	89180	122644	685707	874956	759206	962019	714027	ng/g
Trehalose	5557.65	4547.12	3433.73	3843.32	3212.67	33235	29415.3	27379.9	33187.8	29182.9	ng/g
Glucosamine	20908.6	26831.1	20717.7	22954.7	25102.9	135152	137078	109693	183483	173731	ng/g
Stachyose	3649.73	3649.73	3649.73	2649.73	2649.73	10119.6	14502	10568.5	25804.7	22281	ng/g
D-Pinitol	1117.96	1763.61	1188.83	830.905	1215.06	8920.58	9275.85	5689.4	6979.58	7146.43	ng/g
Gluconic acid	41828.4	32569.6	26641.6	24204.5	36387.4	261823	192662	120496	153636	201742	ng/g
D-Maltose	89326.1	77312.3	116805	82157	92640.3	690501	434481	477887	594643	438814	ng/g
Melibiose	98066.5	62483.9	41572.8	23734.7	72881.6	535757	496843	149214	326201	352450	ng/g
D-Mannosamine	3067.22	4097.24	3523.3	3523.3	3405.45	13563.3	13700.7	10908.9	15733.7	15108.9	ng/g
Glucaric acid	37.6416	38.9857	36.6172	37.3219	37.6416	98.2492	101.456	77.0908	98.2492	116.201	ng/g
Mannitol	47181.7	57872.8	39676.7	42309.7	48867.7	97547	88947.9	65062.7	110432	120829	ng/g
Threonic acid	6.36731	6.36731	6.36731	6.23843	6.49619	13.4406	12.6605	9.98265	10.7738	10.383	ng/g
Lactulose	110.669	142.019	92.3861	93.9328	165.855	186.231	175.358	170.42	206.275	142.258	ng/g
D-Ribose	124208	107031	118038	99921.4	92299.9	116529	97534.2	82142.8	103801	143302	ng/g
Galactosamine	2250.99	2782.38	1674.11	2288.23	2575.67	7129.36	7508.52	9442.75	8886.35	9165.43	ng/g
Ribonic acid	184.565	133.943	124.199	126.304	152.584	182.79	157.485	197.744	150.748	127.066	ng/g
D-Arabinose	123451	138906	105139	98519.6	155169	128800	157461	106909	117672	173193	ng/g
Malonic acid	188.932	185.423	270.756	259.35	249.32	310.024	282.877	290.051	268.482	282.884	ng/g
2,3-Diaminopropionic acid	268.765	276.88	272.932	256.641	168.608	327.721	279.863	263.073	272.646	280.704	ng/g
Cytidine 2',3'-cyclic phosphate	60.3952	89.4222	70.3952	70.3952	81.3683	99.748	102.447	93.5454	59.589	89.6843	ng/g
Phenylacetylglutamine	5.91552	4.51116	3.63797	6.85665	6.73754	3.73945	4.98893	4.57105	5.62883	2.34531	ng/g
Aminoadipic acid	717.82	733.988	998.672	942.366	628.169	715.462	809.048	862.984	648.524	729.112	ng/g
Erythronic acid	189.6	84.3585	88.2415	175.577	123.053	129.813	139.539	132.347	122.71	116.318	ng/g
Glycolic acid	8765.14	7215.68	9846.02	7213.2	8492.3	7806.19	8269	6330.18	9736.02	7625.81	ng/g
Oxalic acid	2093.37	1790.11	1810.39	1745.32	1939.37	1900.55	1983.04	1920.56	1650.05	1752.59	ng/g
Methylsuccinic acid	765.97	925.199	986.597	887.289	973.18	696.387	864.611	671.446	998.694	947.021	ng/g
Itaconic acid	2973.2	4397.45	4496.72	4556.36	4704.43	3120.8	2824.42	2099.26	3662.36	3392.83	ng/g
Diethanolamine	78.3709	91.2982	78.3709	78.3709	65.4436	58.715	56.0674	59.8498	44.4929	46.948	ng/g
5-Aminolevulinic acid	3924.04	4458.93	4027.45	4423.73	4304.65	3087.29	1597.43	2756.12	2512.11	2099.28	ng/g
D-Glucose	24706.3	23318.5	14711.1	20968.9	19941.9	101547	144442	100589	158822	131120	ng/g
Fructose 6-phosphate	34121.4	82859.6	59056	104365	89142.3	552932	663708	234364	478154	553498	ng/g
Mannose 6-phosphate	30967.2	70501.9	57401.1	116152	108947	572741	669591	203670	440688	495273	ng/g
Glucose 1-phosphate	40035.4	99674.6	70517	129632	148092	577833	577344	199456	410833	875426	ng/g
2-Glycerophosphoric acid	1.65715e+06	1.57159e+06	1.66961e+06	1.36782e+06	1.48964e+06	1.05287e+06	959733	420869	881157	966237	ng/g
Lactate	285694	305902	277514	270888	283785	167181	162013	246739	167808	187296	ng/g
pyruvic acid	3599.35	3395.54	3264.49	4067.23	4147.66	1658.29	1791.71	2237.98	1271.49	1868.06	ng/g
Oxaloacetic acid	586.68	655.104	689.771	732.503	747.746	200.077	300.077	350.077	283.41	283.41	ng/g
Citric acid	1146.25	1655.28	1666.56	1661.13	1739.85	1069.51	1084.78	710.239	1514.55	1279.07	ng/g
α-Ketoglutaric acid	3399.71	4170.07	4228.94	4432.21	5452.36	927.935	1133.45	997.129	3297.45	1329.58	ng/g
Malic acid	12761.7	11889	12078.3	11876.8	11920.3	10965.8	10199.6	7873.57	12219.7	9303.43	ng/g
Succinic acid	159331	157676	163733	188915	159268	154220	167222	115387	212261	167751	ng/g
Hydrocinnamic acid	9404.44	10399.7	10719.5	9175.08	9096.76	6991.07	6336.36	8977.73	6611.79	6505.07	ng/g
Phenyllactic acid	702.033	722.627	790.149	763.547	839.381	466.869	552.432	602.289	609.071	502.756	ng/g
Phenylethylamine	200.276	290.593	190.275	299.592	217.469	1554.74	1289.49	1854.74	986.151	1007.76	ng/g
Phenylpyruvic acid	19.1662	22.1375	6.50743	16.4197	17.8675	22.0699	25.8797	26.9793	40.5395	29.4282	ng/g
Tyramine	1090.69	1076.95	1284.48	1064.01	835.023	514.591	558.583	734.31	492.083	476.195	ng/g
Norepinephrine	1646.93	924.556	931.627	1058.83	832.023	885.416	1060.57	1069.68	913.247	990.654	ng/g
Dopamine	13.7705	12.0343	13.7121	13.2255	19.6338	12.157	11.3214	12.1219	13.8141	11.3708	ng/g
Epinephrine	17.8599	16.1415	5.53325	15.6946	13.558	3.64141	8.55127	14.3961	7.8759	11.9497	ng/g
Indole-3-lactic acid	9539.94	10194.3	8056.97	8794.03	9501.71	4443.25	3995.12	5688.86	4247.73	4767.23	ng/g
3-Indolepropionic acid	2900.51	2041.31	1139.12	1835.97	1946.16	842.48	953.045	1487.42	1340.24	1042.04	ng/g
Indoleacetic acid	1616.6	1561.1	1636.27	1874.81	1761.38	954.533	897.697	720.052	818.639	904.829	ng/g
Tryptamine	214.871	322.543	317.199	214.871	314.871	1071.11	1355.42	1322.2	1141.81	1367.87	ng/g
Quinoline	25.8945	32.0599	12.281	31.9784	20.0109	26.9336	68.7349	59.3724	56.1864	76.9322	ng/g
Indole-3-carboxaldehyde	25.523	20.1902	15.9322	18.273	21.7115	29.663	28.9881	29.6884	23.4456	24.3562	ng/g
3-Methyloxindole	30.613	41.9621	23.1002	37.3501	34.1211	3.68086	15.0023	8.59375	20.3502	7.70791	ng/g
Indole-3-methyl acetate	19.8792	17.465	12.6502	17.6867	15.7991	21.0964	23.3788	29.2829	15.4577	17.9371	ng/g
N-Acetylserotonin	2.59033	2.41026	0.673941	2.79588	2.07672	3.64898	10.3734	11.0324	9.40949	12.0902	ng/g
Indoleacrylic acid	6.04097	3.56947	0.716497	3.8652	3.08635	1.31626	4.23476	5.54944	3.66382	3.69107	ng/g
Indole-3-acetamide	1.51491	1.35464	0.472824	1.46316	1.01265	0.933304	2.35927	2.14089	1.77946	2.47732	ng/g
Melatonine	0.168384	0.169231	0.140786	0.185784	0.146233	0.171062	0.262499	0.244636	0.239297	0.278993	ng/g
Beta-Muricholic acid (β-MCA)	225129	150607	255183	269595	225129	114261	140682	105112	153688	145695	ng/g
Murideoxycholic acid（MDCA）	50591.2	66336.3	75837.7	105212	67051.4	35631.1	40738.1	39753.7	40891.8	43193.9	ng/g
Beta-Hyodeoxycholic acid (β-HDCA)	38732.5	45407.5	47418.7	56417.8	44968.6	20469.9	30294.7	20506.8	29567	33715.3	ng/g
Ursodeoxycholic acid (UDCA)	21240.8	27041.5	27564.2	32352.1	25678.2	12465.4	16501.7	12106.3	14515.1	18952.3	ng/g
Beta-Ursodeoxycholic acid (β-UDCA)	21385.9	26290.8	25739.6	28559.3	24737.1	11392.6	16377.9	11834.4	15070.6	17304.3	ng/g
Chenodeoxycholic acid （CDCA）	20500.9	24495.8	24048.1	29663.5	22796.1	11542.7	15583.6	15254	15149	17134.8	ng/g
Hyodeoxycholic acid （HDCA）	16563.2	16490.7	18269.2	18293.9	15175.8	16195.8	16683.1	17760.6	15060.3	14088.3	ng/g
Deoxycholic acid (DCA)	16989.7	15918.7	17185.4	18360.5	15004.3	14841	15339.9	15259.6	19454	13842.8	ng/g
Isolithocholic acid (IsoLCA)	14966.8	10750.6	15598.1	15195.8	12671.8	6788.4	8772.36	8513.07	10096.6	8874.35	ng/g
Lithocholic acid （LCA）	10953.8	11161.4	12854.2	13358.2	10808.2	5815.09	7840.19	7865.73	9259.21	9094.65	ng/g
Isodeoxycholic acid (IsoDCA)	9453.67	9166.6	9948.67	10140.1	8245.04	8599.64	8776.15	7152.25	7354.69	7707.84	ng/g
7-Ketolithocholic acid (7-KLCA)	8108.87	4418.49	6655.04	5852.94	5720.18	7261.17	7376.14	6032.09	7701.14	4569	ng/g
Apocholic acid（ACA）	7727.69	3381.83	6339.03	4746.17	5039.5	6577.2	6849.61	7549.47	8245.68	5318.15	ng/g
Hyocholic acid (HCA)	5856.45	5856.45	5950.75	5887.88	5904.6	4976.16	4264.42	5005.37	6253.57	3081.2	ng/g
7-Dehydrocholic acid (7-DHCA)	3000.76	1151.69	2288.57	2057.7	2551.31	1432.62	1471.79	1206.16	2564.89	1223.77	ng/g
Ursocholic acid (UCA)	2469.76	2011.3	3510.78	3189.36	2456.83	1110.11	1081.25	972.077	1032.48	972.934	ng/g
3-Dehydrocholic acid (3-DHCA)	2014.22	1766.88	1722.86	1596.22	1734.2	745.736	827.007	839.114	758.507	622.17	ng/g
Cholic acid (CA)	886.29	547.195	797.163	575.125	518.66	1478.93	1314.35	1444.83	1857.89	877.366	ng/g
Tauro-α-muricholic acid (ω-TMCA)	599.136	380.438	370.253	497.191	513.931	255.617	303.535	328.173	258.036	331.223	ng/g
Tauro-α-muricholic acid (α-TMCA)	578.585	357.497	348.969	452.286	488.908	268.552	289.131	250.488	278.714	352.497	ng/g
Tauro-β-muricholic acid (β-TMCA)	552.142	379.217	332.484	428.654	472.907	242.745	281.812	291.953	243.535	321.495	ng/g
Taurodeoxycholic acid (TDCA)	154.218	155.38	118.896	126.926	136.079	139.002	110.635	111.106	122.478	95.6552	ng/g
Taurochenodeoxycholic acid (TCDCA)	128.674	133.473	94.1012	117.211	127.653	107.548	101.151	150.571	120.04	86.4463	ng/g
Taurohyodeoxycholic acid	84.7358	70.761	58.5638	79.5276	91.3945	71.3846	71.5251	85.4165	68.5052	72.9047	ng/g
Nordeoxycholic acid (NorDCA)	47.691	45.1658	57.7973	57.4944	47.0235	65.2987	52.1346	56.8408	76.4354	53.9712	ng/g
Glycohyodeoxycholic acid（GHCA）	39.6043	35.4511	31.7876	25.2417	24.317	47.1223	53.6913	31.3259	51.8852	46.558	ng/g
Glycodeoxycholic acid (GDCA)	35.0079	34.2745	29.46	20.479	21.6198	45.5684	51.0642	31.5962	46.1205	41.0066	ng/g
Glycocholic acid （GCA）	21.5857	29.5648	15.3655	22.172	22.172	18.2465	17.2221	22.1701	20.8802	12.7137	ng/g
Taurolithocholic acid (TLCA)	4.8897	4.38426	4.2753	4.716	5.31476	6.84707	6.84707	6.942	6.75214	6.84707	ng/g
Choline	17356.1	15689.2	16433.9	16528.4	17720.3	6550.91	6169.51	5511.9	5499.5	7114.84	ng/g
Betaine	724.654	605.085	733.275	614.615	694.024	543.1	534.685	622.622	442.392	459.674	ng/g
Phosphorylcholine	742.885	968.818	798.789	818.97	1093.71	1454.51	1129.63	1207.83	1006.17	1966.91	ng/g
Acetylcholine	43.9447	46.0388	33.1854	45.3999	38.9574	284.78	327.093	253.287	277.569	582.89	ng/g
Trimethylamine-N-oxide（TMAO）	0.292587	0.255803	0.292587	0.282215	0.339742	1.32338	1.39321	1.38398	1.36686	1.36686	ng/g
Trimethylamine（TMA）	7322.55	6265.82	5693.79	5558.07	6914.2	19009.7	17309.2	18613.7	18377.4	19398.2	ng/g
Dimethylamine（DTMA）	10265.9	8753.91	10335.7	11904.9	8780.68	24426	21598.5	17860.9	26310.5	18591.3	ng/g
Picolinic acid	2526.94	2975.56	2726.1	2717.67	2942.15	3414.77	3115.57	3145.66	3482.15	3945.6	ng/g
Vitamin B1	6715.49	7148.81	6831.41	6784.63	6871.06	12411.6	13490.5	10778.9	14192.2	14436.9	ng/g
Pyridoxamine	65022.7	80124.8	79834.9	84437.3	65550.1	104827	110780	102640	128460	126531	ng/g
Vitamin B2	1573.79	1922.01	1834.58	1716.92	1904.14	8094.04	7894.79	4940.1	5489.12	8269.98	ng/g
Nicotinic acid(VB3)	43156.2	50257	49270	52009.9	52106.7	59223.3	56736.2	51767.3	65731.6	73920.7	ng/g
Pantothenic acid(VB5)	4026.07	5034.26	5203.75	5284.8	4587.02	8931.02	8460.1	7116.67	11896.2	12165.5	ng/g
Vitamin B7	8574.19	7720.07	2844.51	8324.04	5507.2	3954.24	11330.2	11178.4	9433.12	12521.9	ng/g
Cinnavalininate	1439.89	3316.75	2154.15	1871.37	1322.17	2542.89	1757.35	3702.27		3341.44	ng/g
Equol	4522.22	4348.22	864.187	3722.16	3268.5	1497.73	4389.51	5820.32	2355.09	4806.46	ng/g
p-Cresyl sulfate	236.981	230.558	59.8844	260.234	270.015	110.604	426.596	352.624	273.194	354.432	ng/g
Linoleoyl ethanolamide	3890.93	2947.77	2478.39	2627.17	2572.12	2392.27	2742.4	3921.32	1438.77	2374.2	ng/g
Palmitoylethanolamide		21513.7	75379.4	35144	37830.8			58530.9	65156.7	79013	ng/g
Oleoylethanolamide	1146.97	860.048	903.633	827.001	904.021	1951.32	1592.54	1129.68	1407.94	2115.31	ng/g
Anandamide	1.50091	0.951578	0.696403	1.13049	0.903065	4.38602	5.62922	3.64729	4.76152	5.18649	ng/g
Phenol	92.0872	80.7947	30.3404	61.6626	77.8318	61.1862	145.313	166.594		80.0506	ng/g
Spermidine	839608	649940	253825	719304	460907	130173	398905	484227	443903	401161	ng/g
3,4-Dihydroxymandelic acid	19949.7	16015.6	5852.75	16643	13462.5	4744.77	13949	16856.3	12893.7	10983.7	ng/g
Benzamide	13.8338	43.1312	13.0109	13.7169	10.7035	2373.93	5263.5	2817.8	4410.89	8392.28	ng/g
Vanillic acid	159.328	111.892	46.0581	139.446	96.1832	70.0626	184.891	130.853	80.5077	126.48	ng/g
3-Aminosalicylic acid	17265.6	13241.2	4806.4	15880.1	11858.6	3621.72	11106.9	13267.2	9198.04	8395.46	ng/g
3-Hydroxybenzaldehyde	274.393	221.064	93.9032	221.102	197.369	120.958	365.977	394.767	280.2	372.182	ng/g
Lumichrome	39.383	34.9527	8.01523	43.0355	41.6402	38.8418	143.752	94.9168	48.6877	79.736	ng/g
2-Hydroxyphenethylamine	2321.85	2895.08	1029.31	2621	2135.47	3249.29	9570.78	8038.92	8005.39	9202.88	ng/g
2-Hydroxy-4-(methylthio)butanoic acid	1.07102	1.06704	0.463871	1.05674	1.02682	0.327331	0.930035	0.889352	1.12285	1.01753	ng/g
Didecanoylphosphatidylcholine	26.0033	39.2058	90.1929	34.7862	53.3046	68.3975	35.8817	71.6055	31.9186	34.411	ng/g
Lipoamide	3.57032	3.2635	1.22373	4.42157	4.75954		8.55884	5.35817	4.38412		ng/g
4-Hydroxybenzaldehyde	1278.45	1066.07	388.646	985.658	868.46	644.409	1966.7	1954.63	1461.69	1837.72	ng/g
Salicylamide	6.22254	4.64655	5.30271	4.01353	7.01859	2.21864	3.2175	2.60595	2.13879	1.7499	ng/g
Sphinganine	21939.7	20990.7	22844.8	20322.3	19891.5	38872.5	43207.4	44161.9	55970.6	39584.9	ng/g
Sphingomyelin	8668.62	12799.1	10070.5	11237.2	17513.3	32027.6	7641.09	14583.8	12986.4	11540.7	ng/g
Sabinic acid	9.98217	10.2248	9.03384	11.4153	11.4489		7.98733		9.3892	9.93677	ng/g
Retinoic acid	57.9815	114.098	210.221	130.325	170.965	290.062	273.545	264.945	235.585	221.734	ng/g
Deoxycorticosterone acetate	6.66049	3.84608	5.9773	5.37127	5.67194	3.83804	4.40138	4.73949	4.80774	2.5509	ng/g
1-Oleylglycerol	79453.6	86068.5	95868.7	94916.9	77124.7	67994.9	70939.8	61509.8	96240.8	65766.2	ng/g
Glycerol-myristate	296.541		288.806			158.768	182.546	384.375	234.578	184.769	ng/g
Quinic acid	189.865	183.065	197.633	167.25	212.459	60.0708	74.579	180.81	60.4378	61.8921	ng/g
Anserine	38.1925	56.8351	46.7079	46.6018	63.3864	74.2679	77.5843	52.7346	59.7898	43.2167	ng/g
Allantoin	769.477	576.265	534.715	464.019	569.904	5571.58	6002.02	4605.39	3805.05	3004.49	ng/g
1,3-Diaminopropane	489.854	534.267	454.136	495.256	489.208	797.084	842.407	918.66	788.39	766.095	ng/g
Cholesterol sulfate	138843	275062	166556	215786	252454	209190	176828	232032	211928	204766	ng/g
4-Pyridoxic acid	156002	134205	141124	147716	133775	82075.7	96186.1	98716.2	101016	82955.3	ng/g
3-Hydroxymethylglutaric acid	545.077	542.62			536.277	2096.67	1797.83	973.714	2162.24	2160.34	ng/g
Phosphonoacetate	22413.8	39269.4	30116.6	63255.9		145384	129141	78969.6	124316	177946	ng/g
4-Trimethylammoniobutanoic acid	56573.3	58846.5	55944.5	59199.8	56139.7	55471.6	64050.4	52219	80419.2	59237.8	ng/g
N-Acetylputrescine	1862.06	1336.28	1643.4	1311	1560.3	22439.4	24011.2	18709.9	37560.9	24069.9	ng/g
Histidinol	5536.58	6718.32	6699.01	6401.24	7117.41	4164.35	3872.95	2389.91	4214.12	2548.73	ng/g
p-Aminobenzoic acid	255457	282101	283614	276916	286414	397553	430988	392470	490355	477338	ng/g
3-Amino-4-hydroxybenzoate	55003.5	60590.1	54760.9	60821	66117.8	70976.7	73707.5	62679.2	84563.3	76505.4	ng/g
Carnitine	889.637	1104.02	857.743	651.249	1257.03	1246.99	1371.32	2298.45	883.426	1092.42	ng/g
Glutarylcarnitine	266.883		322.939	644.815	314.599	753.781	752.299	667.623	669.506		ng/g
Acetylcarnitine	1351.24	1193.92	881.816	444.135	957.155	7129.02	6096.67	10428.2	3556.73	5751.97	ng/g

## Sheet: Sheet3
	Nor1	Nor2	Nor3	Nor4	Nor5	Nor6	KHS1	KHS2	KHS3	KHS4	KHS5	KHS6	KCPL1	KCPL2	KCPL3	KCPL4	KCPL5	KCPL6	TCPL1	TCPL2	TCPL3	TCPL4	TCPL5	TCPL6
Indole-3-lactic acid	10852.2	8855.51	10312.7	10701	9292.82	9231.34	5572.24	5101.75	4306.71	4148.99	4447.6	3351.51	7077.53	7721.93	8210.19	9361.88	8699.67	8381.35	7656.89	6240.5	7809.39	7694.81	7568.9	7979.83
3-Indolepropionic acid	2939.4	1961.3	1595.07	2766.81	1842.91	1251.51	983.5	926.159	957.985	1497.6	970.216	1480.85	1040.72	1108.77	1113.69	1551.67	1774.31	1174.17	1007.53	1057.96	1060.13	994.351	932.127	963.098
Indoleacetic acid	1636.35	1695.02	1406.26	1251.51	1505.9	1457.83	740.49	854.428	1016.88	818.939	932.149	937.817	1466.9	1349.9	1462.63	1599.84	1667.44	1233.78	1386.69	1123.62	1110.59	943.922	1010.82	1101.22
Beta-Muricholic acid (β-MCA)	231358	232551	152311	221240	218747	211644	109538	138248	109640	123076	148841	131769	157697	130289	178343	133187	142431	146017	158902	128469	158361	115208	115524	147672
Murideoxycholic acid（MDCA）	43936	46947.2	44887.6	39826.4	37850.9	46944.4	34108.3	33523.2	32510.9	31938.4	28986.9	34009.8	38948.9	54395.9	42050.4	36161.1	46114.4	37010.9	32734.8	34460.2	31801.7	31957.3	35552.5	37647.5
Beta-Hyodeoxycholic acid (β-HDCA)	40758.5	55686.3	37806.9	59128.1	38708.9	42423.1	32676.9	27984.9	27346.1	31498.8	25790.9	34116	31000.6	51591.6	49058.3	38234.8	54872.2	50673.7	33579.1	39461.9	34215.3	30807.5	34430.2	32152.9
Chenodeoxycholic acid （CDCA）	49774.3	47628.1	44439.7	38514.8	32479.6	46802	26234.1	26594.6	22685	23362.9	23936.1	24193.9	44110.1	41371.9	47765.4	46338.2	44310.4	31812.3	31691	26279.4	29526.9	26607.4	33845	29904.9
Lithocholic acid （LCA）	26812.8	26546.2	21317.4	25509.2	25663.3	21011.2	18967.2	11237.5	18179.7	13117.4	18433.1	11896	32376.2	22641.8	21715.5	25975.2	26044	27343.8	20684.4	23754.4	22809.5	22968.7	24145	20425.5
Isodeoxycholic acid (IsoDCA)	13349	18483.2	17228	10842.2	17323.7	19087	5272.72	7224.42	7169.67	7982.85	7976.39	8686.56	9305.54	9665.22	11175.2	9189.55	9866.36	10666.2	7019.96	9621.45	9324.08	9752.1	8645.49	9973.13
3-Dehydrocholic acid (3-DHCA)	1817.28	2500.91	2492.46	1907.29	2106.05	2469.49	638.14	665.825	671.735	611.429	655.282	810.252	1785.58	1761.51	1679.72	1987.73	1940.28	1583.19	1132.72	1335.36	1015.11	1368.99	1122.99	1385.42
Cholic acid (CA)	840.651	823.241	531.614	848.908	693.869	763.062	664.029	587.23	700.357	596.563	6240.77	7427.7	7871.23	7554.03	8188.84	7030.39	8892.4	8696.43	6141.5	6398.74	6018.36	6511.3	8196.04	6241.41
Isodeoxycholic acid (IsoDCA)	8180.44	8010.19	9783.11	8503.54	8590.44	9682.52	6211.94	7094.91	6637.27	7649.44	1084.24	952.461	1053.06	1435.82	1109.35	1494.46	1346.71	1397.63	1195.75	1000.75	1131.04	1139.33	1059.64	1157.17
Ursocholic acid (UCA)	3903.35	3094.01	3063.47	2054.36	2976.6	2108.61	1183.46	989.175	915.198	1069.85	18278	10266.8	21647.7	21076.2	22333.9	19887.6	15622.4	19521.7	20596.4	13794.1	15836.9	16756.5	18023.3	20776.8
Ursodeoxycholic acid (UDCA)	23790	28970.5	22446.1	29886.8	29999.5	22923.9	14926	19134.1	10361	19036.5	13065.3	11919.2	22504.4	20013.8	16884.3	22617.3	17596.6	17905.1	21260.5	15959.3	15341.6	13244.6	21804.3	15321.2
Beta-Ursodeoxycholic acid (β-UDCA)	24586.2	27315.7	27685.2	20324.2	25250.9	28038.9	14295	11564	16356.8	14308.4	1.71691	1.65496	0.816199	0.822657	0.765659	0.841629	0.549416	0.605923	0.952919	1.20549	1.10596	1.20595	1.26269	1.24192
Trimethylamine-N-oxide（TMAO）	0.356617	0.415614	0.256317	0.282215	0.246106	0.165603	1.51616	1.60519	1.40516	1.36686	10650.6	18746.1	7484.71	6711.19	7869.15	7515.48	9985.03	6050.97	10902.8	8873.26	8781.27	7830.06	8869.82	8856.23
Trimethylamine（TMA）	6953.17	5497.5	6195.32	6347.43	5740.45	6212	13378.6	13569	11591.9	11187.3	19745.5	18591.6	10550.7	13262.9	12070.6	11064.7	11628.8	12324	13146.4	15316.5	16305.8	16326	15550.2	14552.2
Dimethylamine（DTMA）	12612.5	11962.6	12417	12729.8	8274.81	14417	15455.9	18144.5	15521.9	17766.6
