# Supplementary material for: Cyclocarya paliurus leaves alleviate high-sucrose diet-induced obesity by improving intestinal metabolic disorders
Source: Aging (Albany NY). 2024 Mar 14;16(6):5452–70. doi: 10.18632/aging.205657 (PMC11006468; doi:10.18632/aging.205657)
Supplement: Supplementary File 2 [file aging-16-205657-s004.xlsx]

## Sheet: C18
Supplementary File 2. Standard curve of 650 metabolites.
ID	Liner	range (ng/ml)	R2	name
G345_q	y=0.0002668x-0.3617	0.5~1000	0.9948	Epinephrine
G394_q	y=0.0002681x+1.0528	0.5~1000	0.99764	Acetoin
GFC21_q	y=0.0000005x+1.2448	1~5000	0.9779	Hexanoic acid
G62_q	y=0.000005x+0.0106	1~5000	0.97336	Spermidine
G130_q	y=0.0002754x-0.0293	0.5~1000	0.97743	Taurocholic acid (TCA)
G344_q	y=0.0002669x+0.0974	0.5~1000	0.97643	Dopamine
G261_q	y=0.0000074x+0.0433	1~5000	0.96878	Oxoadipic acid
G259_q	y=0.0000244x+0.0194	1~5000	0.97416	Methylmalonic acid
G94_q	y=0.0000041x-0.0697	1~5000	0.9952	3-Aminosalicylic acid
G159_q	y=0.0002668x+0.0705	0.5~1000	0.98177	Ribonolactone
G65_q	y=0.0000003x+0.0575	10~10000	0.99817	3,4-Dihydroxymandelic acid
G191_q	y=0.0000837x+0.0075	0.5~1000	0.99322	But-2-enoic acid
G194_q	y=0.0001212x+0.0639	0.5~1000	0.98295	Citraconic acid
G77_q	y=0.0000222x+2.0077	1~5000	0.9898	Gallic acid
G349_q	y=0.0001059x-0.0077	0.5~1000	0.99776	Tyramine
G80_q	y=0.0002711x+0.0978	0.5~1000	0.984	m-Aminobenzoic acid
G354_q	y=0.0000038x+0.057	1~5000	0.98527	Vanillylmandelic acid
G325_q	y=0.0001204x+0.1078	0.5~1000	0.99403	Serotonin
G242_q	y=0.0000022x+0.0249	1~5000	0.99775	Alpha-Ketoisovaleric acid
G346_q	y=0.0000146x+0.0454	1~5000	0.99265	Norepinephrine
G234_q	y=0.0000168x+0.0042	1~5000	0.98541	2-Furoic acid
G86_q	y=0.0000025x+0.0149	1~5000	0.99494	Phenylacetic acid
G396_q	y=0.0000004x+0.0542	10~10000	0.99429	Chlorogenic acid
G71_q	y=0.0000016x+0.0056	1~5000	0.98579	4-Hydroxyhippuric acid
GFC29_q	y=0.0000002x+0.0644	10~10000	0.99507	Octanoic acid
G347_q	y=0.0001802x+0.054	0.5~1000	0.99543	3-Methoxytyramine
G12_q	y=0.0002682x-0.0644	0.5~1000	0.98595	2-Hydroxy-2-methylbutyric acid
G82_q	y=0.0000109x+0.054	1~5000	0.98411	Mandelic acid
G90_q	y=0.0000778x-0.061	0.5~1000	0.9829	Protocatechuic acid
G178_q	y=0.0002671x+0.0996	0.5~1000	0.98243	2-Methylhexanoic acid
G95_q	y=0.0000019x-0.0854	1~5000	0.99873	3-Hydroxyanthranilic acid
G290_q	y=0.0000024x+0.0299	1~5000	0.99501	N-Methylnicotinamide
G175_q	y=0.000076x+0.0366	0.5~1000	0.99612	2-Hydroxy-3-methylbutyric acid
G320_q	y=0.0000694x+0.0661	0.5~1000	0.98138	Indoxyl sulfate
G329_q	y=0.0001572x+0.0661	0.5~1000	0.98778	Xanthurenate
G254_q	y=0.0000025x-0.0624	1~5000	0.99316	Ketoleucine
G288_q	y=0.0000017x+0.0428	1~5000	0.98693	Hydroxyphenyllactic acid
G238_q	y=0.0000023x+5.0598	1~5000	0.99177	3-Methy2-oxovaleric acid
G185_q	y=0.0000195x+0.0849	1~5000	0.98892	Adipic acid
G212_q	y=0.0000269x-0.0615	1~5000	0.98226	Methylglutaric acid
G85_q	y=0.0000326x+0.0021	1~5000	0.99308	p-Hydroxyphenylacetic acid
G51_q	y=0.0000905x+0.0715	0.5~1000	0.98452	N-Acetytyrosine
G202_q	y=0.0000455x+0.0205	1~5000	0.97422	Ethylmethylacetic acid
G294_q	y=0.0000106x+0.0741	1~5000	0.99403	Pyrrole-2-carboxylic acid
G93_q	y=0.0012133x+0.0242	0.5~1000	0.9482	Phenylethylamine
G285_q	y=0.0000233x+0.0833	1~5000	0.99542	3-3-Hydroxyphenyl -3-hydroxypropanoic acid
G74_q	y=0.0009728x-0.0437	0.5~1000	0.92514	Benzamide
G326_q	y=0.0000011x+0.0097	1~5000	0.96025	5-Hydroxyindole-3-acetic Acid
G395_q	y=0.0000122x+0.0151	1~5000	0.92967	Phenol
G68_q	y=0.0001368x+0.0014	0.5~1000	0.93839	4-Hydroxybenzoic acid
G69_q	y=0.000125x+0.0906	0.5~1000	0.94501	3-Hydroxybenzoic acid
G89_q	y=0.00011x+0.0971	0.5~1000	0.9546	Phthalic acid
G270_q	y=0.0000005x+6.2003	10~10000	0.97165	Indole-3-carboxylic acid
G72_q	y=0.0000012x-0.0583	1~5000	0.96797	4-Hydroxyphenylpyruvic acid
G78_q	y=0.0003207x+0.0043	0.5~1000	0.9701	Hippuric acid
G8_q	y=0.0020805x+0.0498	0.05~1000	0.99388	N-Acetylserotonin
G79_q	y=0.0000142x+0.0674	1~5000	0.94905	Homovanillic acid
G88_q	y=0.0000317x+0.013	1~5000	0.97231	Phenylpyruvic acid
G318_q	y=0.0014251x+0.0748	0.05~1000	0.95213	Tryptamine
G236_q	y=0.0000087x+0.0303	1~5000	0.97665	3,4-Dihydroxyhydrocinnamic acid
G92_q	y=0.0000191x-0.0303	1~5000	0.96895	Vanillic acid
G363_q	y=0.0000841x-0.0629	0.5~1000	0.92911	Phenylacetylglycine
G180_q	y=0.0000418x+0.0071	1~5000	0.99901	3-Methyladipic acid
G368_q	y=0.000007x+0.0714	1~5000	0.99642	p-Cresol
G340_q	y=0.0000083x+0.0752	1~5000	0.95727	Vitamin B7
G91_q	y=0.0002316x+0.0847	0.5~1000	0.98072	Salicyluric acid
G267_q	y=0.0022375x-0.0847	0.05~1000	0.98718	Indole-3-acetamide
GFC33_q	y=0.0000168x+0.0836	1~5000	0.95729	Pentadecanoic acid
G66_q	y=0.000075x+0.0633	0.5~1000	0.97687	3-Hydroxyphenylacetic acid
G83_q	y=0.0001618x+0.0788	0.5~1000	0.9208	Ortho-Hydroxyphenylacetic acid
G367_q	y=0.0000007x+0.0025	1~5000	0.99394	3-(4-Hydroxyphenyl)propionic acid
G165_q	y=0.0004235x+0.0773	0.5~1000	0.98611	4-Hydroxycinnamic acid
G84_q	y=0.0000017x-0.0917	1~5000	0.99255	p-Hydroxymandelic acid
G87_q	y=0.0000279x+0.0908	1~5000	0.96688	Phenyllactic acid
G176_q	y=0.0002737x+0.072	0.5~1000	0.97762	2-Hydroxycaproic acid
G330_q	y=0.0000012x+0.0535	1~5000	0.98043	Cinnavalininate
G334_q	y=0.000167x+0.024	0.5~1000	0.99603	Indole-3-lactic Acid
G9_q	y=0.0001025x+0.0821	0.5~1000	0.92718	N-acetyltryptophan
G323_q	y=0.0014424x+0.0455	0.05~1000	0.93843	Kynurenate
G322_q	y=0.0000704x-0.0455	0.5~1000	0.99732	Indole-3-carboxaldehyde
G226_q	y=0.000191x+0.0942	0.5~1000	0.93574	Suberic acid
G319_q	y=0.0000029x+0.0678	1~5000	0.9198	Indole
G274_q	y=0.0076313x+0.0529	0.05~1000	0.97741	Melatonine
G272_q	y=0.0012032x+0.0686	0.5~1000	0.94431	Indoleacetic acid
G76_q	y=0.0000058x+0.0418	1~5000	0.98222	Benzoic acid
G283_q	y=0.0002006x+0.0833	0.5~1000	0.97125	2-Hydroxycinnamic acid
G333_q	y=0.0000099x+0.0885	1~5000	0.98428	Indole-3-acetaldehyde
G387_q	y=0.0004257x+0.0604	0.5~1000	0.97184	p-Cresyl sulfate
G190_q	y=0.0000436x+0.0264	1~5000	0.93019	Azelaic acid
G268_q	y=0.0000023x+0.0674	1~5000	0.97628	3-Indolepropionic acid
G273_q	y=0.0002515x+0.0487	0.5~1000	0.95363	Indoleacrylic acid
G284_q	y=0.0000009x+0.0465	1~5000	0.97024	2-Phenylpropionic acid
G181_q	y=0.000002x+0.0408	1~5000	0.94448	3-Methylpentanoic acid
G287_q	y=0.0000116x+0.0221	1~5000	0.93422	Hydrocinnamic acid
G365_q	y=0.0000016x+0.0551	1~5000	0.98071	Equol
G225_q	y=0.0041053x+0.0841	0.5~1000	0.97911	Sebacic acid
G286_q	y=0.0017076x+0.0643	1~5000	0.93661	3-Phenylbutyric acid
G75_q	y=0.0000246x-0.0416	10~10000	0.98901	Benzenebutanoic acid
G269_q	y=0.0001859x+0.0359	1~5000	0.92282	3-Methylindole
G127_q	y=0.0092202x+0.007	0.5~1000	0.96901	Tauro-β-muricholic acid (β-TMCA)
G128_q	y=0.0084231x+0.0201	0.5~1000	0.9945	Tauro-ω-muricholic acid
G126_q	y=0.0088898x+0.0539	0.5~1000	0.94083	Tauro-α-muricholic acid
G205_q	y=0.0001584x+0.0001	1~5000	0.97901	Heptanoic acid
G133_q	y=0.0067119x+0.0051	0.5~1000	0.98117	Taurohyodeoxycholic acid
G112_q	y=0.0385466x+0.0857	0.5~1000	0.97563	Ursocholic acid (UCA)
G116_q	y=0.0126937x+0.0365	1~5000	0.94994	Glycochenodeoxycholic acid (GCDCA)
G122_q	y=0.0880758x+0.0761	0.5~1000	0.9661	Glycoursodeoxycholic acid (GUDCA)
G100_q	y=0.0555469x-0.0137	0.5~1000	0.98679	7-Dehydrocholic acid (7-DHCA)
G103_q	y=0.0059258x+0.0054	1~5000	0.9311	Beta-Muricholic acid (β-MCA)
G117_q	y=0.0126065x+0.0103	1~5000	0.94856	Glycocholic acid （GCA）
G125_q	y=0.0071579x+0.0644	1~5000	0.98858	Murocholic acid (MoCA)
G106_q	y=0.1446227x+0.0376	1~5000	0.99732	Glycolithocholic acid-3-Sulfate
G7_q	y=0.5313924x-0.0644	0.5~1000	0.99732	Thyronine
G99_q	y=0.1232719x+0.0872	1~5000	0.91889	3-Dehydrocholic acid (3-DHCA)
G129_q	y=0.0169499x+0.0052	1~5000	0.94514	Taurochenodeoxycholic acid (TCDCA)
G131_q	y=0.0138067x-0.0042	1~5000	0.99636	Taurodeoxycholic acid (TDCA)
G136_q	y=0.0066667x+0.0042	1~5000	0.94063	Ursodeoxycholic acid (UDCA)
G105_q	y=0.0066667x+0.0239	1~5000	0.97783	Beta-Ursodeoxycholic acid (β-UDCA)
G113_q	y=0.0066667x+0.017	1~5000	0.98732	Chenodeoxycholic acid （CDCA）
G98_q	y=0.0066667x+0.0978	1~5000	0.93432	Hyocholic acid (HCA)
G101_q	y=0.0066667x+0.0156	1~5000	0.99732	7-Ketolithocholic acid (7-KLCA)
G104_q	y=0.0036121x+0.0617	1~5000	0.989	Beta-Hyodeoxycholic acid (β-HDCA)
G118_q	y=0.0061734x-0.0617	1~5000	0.9416	Glycodeoxycholic acid (GDCA)
G120_q	y=0.0054406x-0.0141	1~5000	0.95101	Glycohyodeoxycholic acid
G137_q	y=0.0001514x+0.0556	1~5000	0.98907	Omega-muricholic acid (ω-MCA)
G114_q	y=0.0074587x+0.0888	1~5000	0.93829	Cholic acid (CA)
G229_q	y=0.0001663x+0.0134	1~5000	0.92327	Undecylenic acid
GFC23_q	y=0.0002149x+0.0276	1~5000	0.96228	Dodecanoic acid
GFC37_q	y=0.0002892x+0.0355	1~5000	0.95901	Undecanoic acid
G134_q	y=0.0266094x+0.0638	0.5~1000	0.98053	Taurolithocholic acid (TLCA)
G111_q	y=0.0906505x+0.0604	0.5~1000	0.99902	Nordeoxycholic acid (NorDCA)
GFC12_q	y=0.0000054x-0.0604	10~10000	0.94353	Decanoic acid
G102_q	y=0.0528991x+0.0107	0.5~1000	0.95894	Apocholic acid
G182_q	y=0.0021084x+0.011	1~5000	0.9549	5Z-Dodecenoic acid
G121_q	y=0.0075148x+0.0109	1~5000	0.96134	Glycolithocholic acid （GLCA）
G115_q	y=0.1230512x+0.0548	0.5~1000	0.99781	Deoxycholic acid (DCA)
G123_q	y=0.1309762x+0.0888	0.5~1000	0.978	Hyodeoxycholic acid （HDCA）
G224_q	y=0.0190052x+0.0235	0.5~1000	0.99693	Ricinoleic acid
G108_q	y=0.0049332x+0.0765	1~5000	0.92011	Isolithocholic acid (IsoLCA)
G124_q	y=0.0051448x+0.0725	1~5000	0.98699	Lithocholic acid （LCA）
G174_q	y=0.0007184x+0.0311	1~5000	0.94241	12Z-Tridecenoic acid
G107_q	y=0.2208612x+0.0617	0.5~1000	0.95857	Isodeoxycholic acid (IsoDCA)
G173_q	y=0.2015798x+0.0258	0.5~1000	0.97047	12-hydroxystearic acid
GFC16_q	y=0.0051665x+0.0135	1~5000	0.99245	5Z,8Z,11Z,14Z,17Z-Eicosapentaenoic Acid
GFC36_q	y=0.0013951x+0.0771	1~5000	0.96986	Tridecanoic acid
GFC5_q	y=0.000029x+0.0546	10~10000	0.99743	10Z-Pentadecenoic Acid
GFC28_q	y=0.0020044x+0.0047	1~5000	0.92192	Myristoleic acid
G214_q	y=0.0022408x+0.0457	1~5000	0.92045	Myristelaidic acid
G388_q	y=0.0244423x+0.0103	0.5~1000	0.97423	Linoleoyl ethanolamide
G391_q	y=0.1630332x+0.0444	0.5~1000	0.95289	Arachidonoyl ethanolamide
GFC18_q	y=0.018515x+0.0975	1~5000	0.95844	Gamma-Linolenic acid
GFC26_q	y=0.0080821x+0.0866	1~5000	0.96236	Alpha-Linolenic Acid
G389_q	y=0.0000246x+0.0436	10~10000	0.93149	Palmitoylethanolamide
GFC32_q	y=0.0055107x+0.0441	0.5~1000	0.94748	Palmitoleic Acid
G219_q	y=0.0045495x+0.0425	0.5~1000	0.99904	Palmitelaidic acid
G390_q	y=0.0018134x+0.0281	1~5000	0.92417	Oleoylethanolamide
GFC13_q	y=0.0450904x+0.044	0.5~1000	0.96121	4Z,7Z,10Z,13Z,16Z,19Z-Docosahexaenoic Acid (DHA)
GFC14_q	y=0.0017016x+0.0668	1~5000	0.9396	4Z,7Z,10Z,13Z,16Z-Docosapentaenoic Acid
GFC22_q	y=0.0000331x+0.0106	10~10000	0.99412	Dihomo-gamma-linolenic acid
GFC6_q	y=0.0004996x-0.0106	1~5000	0.99158	11Z,14Z,17Z-Eicosatrienoic Acid
GFC9_q	y=0.0171897x-0.0716	0.5~1000	0.94461	Arachidonic acid
GFC27_q	y=0.000103x+0.0036	1~5000	0.92176	Myristic acid
GFC25_q	y=0.0345047x+0.0925	0.5~1000	0.96171	Linoleic acid
GFC3_q	y=0.0442227x+0.0726	0.5~1000	0.98526	Linoelaidic acid
G211_q	y=0.0364425x-0.0726	0.5~1000	0.97988	Conjugated linoleic acids (CLA)
GFC20_q	y=0.0008768x+0.0902	1~5000	0.94515	Heptadecanoic acid
GFC4_q	y=0.0124849x+0.029	0.5~1000	0.93082	10E-Heptadecenoic acid
GFC1_q	y=0.0014076x+0.0682	1~5000	0.94153	13Z,16Z-Docosadienoic Acid
G172_q	y=0.0410509x+0.0239	0.5~1000	0.93781	10Z-Heptadecenoic acid
GFC15_q	y=0.0001548x+0.0097	1~5000	0.99443	7Z,10Z,13Z,16Z-Docosatetraenoic acid
G170_q	y=0.0426898x+0.0628	0.5~1000	0.96297	10Z,13Z-Nonadecadienoic acid
GFC31_q	y=0.0015416x-0.0097	1~5000	0.92187	Palmitic acid
GFC30_q	y=0.0426223x+0.0328	0.5~1000	0.99834	Oleic acid
G222_q	y=0.0422078x+0.0346	0.5~1000	0.99788	Petroselinic acid
GFC2_q	y=0.04x+0.0287	0.5~1000	0.961	Elaidic Acid
G217_q	y=0.0163991x+0.0799	0.5~1000	0.92787	10Z-Nonadecaenoic acid
GFC34_q	y=0.0017508x+0.0734	1~5000	0.98076	Stearic acid
GFC7_q	y=0.0000378x+0.0423	1~5000	0.9734	11Z-Eicosenoic Acid
GFC8_q	y=0.0001013x+0.0892	1~5000	0.99089	Arachidic Acid
GFC17_q	y=0.000362x+0.0148	1~5000	0.98878	Erucic Acid
GFC19_q	y=0.0000395x-0.0148	1~5000	0.9261	Heneicosanoic acid
GFC10_q	y=0.0000007x+0.0826	10~10000	0.93	Docosanoic Acid
GFC35_q	y=0.0000913x+0.034	1~5000	0.97166	Tricosanoic acid
GFC24_q	y=0.0009273x+0.0858	1~5000	0.9434	Lignoceric Acid
S366_q	y=0.2103929x+0.0547	0.5~1000	0.99899	Pregnenolone sulfate
S564_q	y=0.0004378x+0.0359	1~5000	0.96417	Thyroxine
S567_q	y=0.0227594x+0.0945	1~5000	0.99364	Sabinic acid
S170_q	y=0.1471093x+0.0266	0.5~1000	0.97004	Palmitoylcarnitine
S551_q	y=0.0017275x+0.0762	1~5000	0.9951	Sphinganine
S593_q	y=0.0013012x+0.0032	1~5000	0.97517	Oleoyglycerol
S595_q	y=0.1200464x-0.0762	0.5~1000	0.94616	Glyceromyristate
S211_q	y=0.0008259x-0.0032	0.5~1000	0.92328	3-Nitrotyrosine
S219_q	y=0.0000061x+0.04	1~5000	0.96454	5'-Deoxyadenosine
S228_q	y=0.0000077x+0.0334	1~5000	0.95476	N-Acetylmethionine
S305_q	y=0.0011493x+0.0921	0.5~1000	0.91829	N-Formymethionine
S355_q	y=0.000028x+0.015	1~5000	0.9289	3-Hydroxybenzaldehyde
S358_q	y=0.0000126x+0.0532	1~5000	0.99209	Indoxyβ-D-glucoside
S372_q	y=0.0001867x+0.0915	0.5~1000	0.98945	3,5-Diiodo-tyrosine
S377_q	y=0.0003838x+0.061	0.5~1000	0.97251	5-Valerolactone
S378_q	y=0.0003991x+0.0743	0.5~1000	0.98385	Caffeate
S379_q	y=0.0058172x+0.0773	0.05~1000	0.94089	Lumichrome
S381_q	y=0.0001786x+0.0681	0.5~1000	0.98882	N-Acetyphenylalanine
S385_q	y=0.0040514x+0.0806	0.05~1000	0.98596	N-Methyltryptamine
S387_q	y=0.0001014x+0.0464	0.5~1000	0.92482	2-Pyrocatechuic acid
S389_q	y=0.0001589x+0.0524	0.5~1000	0.98337	Tryptophanol
S390_q	y=0.0027193x+0.0663	0.05~1000	0.92987	trans-Ferulic acid
S392_q	y=0.0000326x+0.0251	1~5000	0.92561	2-Hydroxyphenethylamine
S393_q	y=0.0000226x+0.0565	1~5000	0.91832	6-Methylthiopurine
S394_q	y=0.0042323x+0.0407	0.05~1000	0.97216	2-Hydroxy-4-(methylthio)butanoic acid
S409_q	y=0.0000005x+0.0663	1~5000	0.99465	Methyl vanillate
S41_q	y=0.0025118x+0.0867	0.05~1000	0.99934	5'-Methylthioadenosine
S411_q	y=0.0012658x+0.0018	0.5~1000	0.95811	Lipoamide
S423_q	y=0.0000355x+0.0513	1~5000	0.98347	4-Hydroxybenzaldehyde
S424_q	y=0.0007224x+0.0504	0.5~1000	0.94731	3-(2-Hydroxyphenyl)propanoic acid
S427_q	y=0.0002508x+0.0666	0.5~1000	0.97603	Quinaldic acid
S445_q	y=0.0014616x+0.0262	0.05~1000	0.97597	Dethiobiotin
S466_q	y=0.0064126x+0.085	0.05~1000	0.97517	N-Acetylleucine
S467_q	y=0.0007813x+0.0995	0.5~1000	0.99073	2',4'-Dihydroxyacetophenone
S477_q	y=0.000728x+0.0476	0.5~1000	0.95184	Salicylamide
S490_q	y=0.00407x+0.0259	0.05~1000	0.99931	3-Methyloxindole
S498_q	y=0.000042x+0.0091	1~5000	0.9495	Resorcinol monoacetate
S544_q	y=0.0059833x+0.0083	0.05~1000	0.93409	Rosmarinic acid
S571_q	y=0.0000018x+0.0575	1~5000	0.92048	5,6-Dimethylbenzimidazole
S577_q	y=0.0016642x+0.0036	0.05~1000	0.98733	Quinoline
S92_q	y=0.0007069x+0.0508	0.5~1000	0.99308	Caffeine
S94_q	y=0.0021344x+0.0254	0.05~1000	0.99732	Theophylline
S225_q	y=0.0066667x+0.0585	1~5000	0.95994	Dodecanoylcarnitine
S353_q	y=0.0028261x+0.0743	1~5000	0.93808	Cortisol
S404_q	y=0.0483618x+0.0585	0.5~1000	0.99645	10-Hydroxydecanoate
S420_q	y=0.0035636x-0.0254	1~5000	0.97767	3,5-Diiodothyronine
S470_q	y=0.0651992x-0.0585	0.5~1000	0.99546	Indole-3-methyl acetate
S479_q	y=0.0000086x-0.0743	10~10000	0.95061	Ethyl 3-indoleacetate
S480_q	y=0.0029096x-0.0585	1~5000	0.922	Tetrahydrocortisol
S534_q	y=0.0008643x+0.026	1~5000	0.9324	Corticosterone
S546_q	y=0.0620114x+0.0339	0.5~1000	0.95958	Cortexolone
S550_q	y=0.0005646x+0.0135	1~5000	0.94145	Liothyronine
S582_q	y=0.0000291x+0.0649	10~10000	0.99113	1-Hydroxy-2-naphthoate
S585_q	y=0.0765085x+0.0737	0.5~1000	0.92297	trans-Cinnamate
S598_q	y=0.0004608x+0.0115	1~5000	0.98432	Cortisone
S405_q	y=0.0350414x+0.0848	0.5~1000	0.91882	Didecanoylphosphatidylcholine
S536_q	y=0.0006526x+0.0728	1~5000	0.99576	Protoporphyrin
S562_q	y=0.0088163x+0.064	0.5~1000	0.96836	Sphingomyelin
S572_q	y=0.033214x+0.0702	0.5~1000	0.94424	Altrans-retinoic acid
S320_q	y=1.0980785x+0.0245	0.5~1000	0.92448	Biliverdin
S592_q	y=0.2888555x+0.0604	0.5~1000	0.99852	Deoxycorticosterone acetate

## Sheet: Amide
ID	Liner	range (ng/ml)	R2	name
G246_q	y=0.0006842x+0.0623	1~5000	0.98509	Fumaric acid
G151_q	y=0.0006684x+0.0342	1~5000	0.95793	Glyceraldehyde
G291_q	y=0.0006354x-0.0006	1~5000	0.98718	Nicotinamide
G141_q	y=0.0000165x+1.2269	1~5000	0.97857	D-Gluconolactone
G300_q	y=0.0006697x+0.8345	1~5000	0.98886	Oxaloacetic acid
G145_q	y=0.0000516x+0.9947	1~5000	0.95128	D-Xylose
G339_q	y=0.0014702x-4.0015	0.5~1000	0.99521	Pyridoxal VB6
G350_q	y=0.1277388x-0.1277	0.05~1000	0.95719	Acetylcholine
G393_q	y=0.0003848x-0.3504	1~5000	0.98896	Acetamide
G360_q	y=0.0105743x-0.0106	0.5~1000	0.97085	Creatinine
G373_q	y=0.0000014x+0.1551	10~10000	0.97449	Putrescine
G23_q	y=0.0105347x+0.9625	0.5~1000	0.97427	Creatine
G263_q	y=0.0006717x+0.5422	1~5000	0.96787	Pyruvic acid
G348_q	y=0.0000369x+0.7226	1~5000	0.98795	Normetanephrine
G336_q	y=0.0055789x+0.7528	0.5~1000	0.9848	Vitamin B2
G179_q	y=0.0008022x+0.7666	1~5000	0.97074	3-Hydroxyisovaleric acid
G379_q	y=0.0001582x-0.6461	1~5000	0.96044	Allantonin
G157_q	y=0.0000007x+0.7152	10~10000	0.99698	Rhamnose
G240_q	y=0.0007141x+0.2486	1~5000	0.96722	Acetoacetic acid
G235_q	y=0.000827x+0.9561	1~5000	0.98738	2-Hydroxybutyric acid
G241_q	y=0.0007219x+0.1339	1~5000	0.98869	Alpha-Hydroxyisobutyric acid
G18_q	y=0.0241909x+0.0724	0.05~1000	0.95965	Alpha-N-Phenylacetyglutamine
G337_q	y=0.0012399x-0.0871	0.5~1000	0.99857	Niacin acid VB3
G293_q	y=0.0010081x+0.0276	0.5~1000	0.99975	Picolinic acid
G45_q	y=0.0066383x+0.0076	0.5~1000	0.95081	Tryptophan
G67_q	y=0.0004933x-0.0499	1~5000	0.97139	4-Aminohippuric acid
G36_q	y=0.0100956x+0.0363	0.5~1000	0.97789	Kynurenine
G28_q	y=0.000166x+0.0334	1~5000	0.95908	Alpha-aminobutyric acid
G400_q	y=0.0008089x+0.2879	1~5000	0.99566	LeucyGlycine
G331_q	y=0.0009586x+0.0407	0.5~1000	0.95574	Indoxyβ-D-glucuronide
G34_q	y=0.0068154x+0.0424	0.5~1000	0.99177	Isoleucine
G366_q	y=0.0000289x+0.0442	1~5000	0.96874	Lactate
G97_q	y=0.0003324x-0.0764	1~5000	0.99156	Hydroxypyruvic acid
G40_q	y=0.0000862x+0.0462	1~5000	0.96979	Phenylalanine
G237_q	y=0.0003102x+0.0695	1~5000	0.97706	3-Hydroxybutyric acid
G13_q	y=0.0030876x+0.0234	0.5~1000	0.99252	2-Phenylglycine
G328_q	y=0.0000101x+0.0731	1~5000	0.97069	N-Formykynurenine
G357_q	y=0.0007424x-0.0359	1~5000	0.952	Trimethylamine
G359_q	y=0.0570639x+0.0016	0.05~1000	0.9719	Choline
G27_q	y=0.0052277x+0.0015	0.5~1000	0.99693	Alloisoleucine
G35_q	y=0.0051045x+0.0336	0.5~1000	0.95781	Leucine
G39_q	y=0.0004024x-0.0666	1~5000	0.98138	Norleucine
G138_q	y=0.0001018x+0.0199	1~5000	0.95332	N-AcetyD-glucosamine
G14_q	y=0.000141x+0.0584	1~5000	0.96186	3-Chlorotyrosine
G49_q	y=0.0022534x-0.0247	0.5~1000	0.99467	N-Acetyalanine
G358_q	y=0.0119952x+0.0452	0.05~1000	0.99429	Betaine
G3_q	y=0.0007452x+0.0645	0.5~1000	0.9862	Glycyleucine
G38_q	y=0.0002824x+0.0691	0.5~1000	0.9865	Methionine
G383_q	y=0.000853x+0.0332	0.5~1000	0.97593	N-Acetylproline
G142_q	y=0.0000013x-0.0907	1~5000	0.99732	D-Glucose
G338_q	y=0.0016417x-0.0298	0.05~1000	0.97217	Vitamin B5
G257_q	y=0.0038662x-0.0894	0.05~1000	0.97025	Maleic acid
G310_q	y=0.001472x+0.0342	0.05~1000	0.96058	Adenosine-3′,5′-cyclic monophosphate(cAMP)
G48_q	y=0.0000652x+0.0407	0.5~1000	0.95763	Methylcysteine
G17_q	y=0.0004137x-0.1204	0.5~1000	0.9552	Acetylglycine
G250_q	y=0.0000156x+0.0583	1~5000	0.97363	Glycolic acid
G251_q	y=0.0000525x-0.0158	0.5~1000	0.96309	Hydroxypropionic acid
G140_q	y=0.000055x-2.0301	0.5~1000	0.9803	D-Fructose
G324_q	y=0.000201x+0.0254	0.5~1000	0.98878	3-Hydroxykynurenine
G375_q	y=0.0000012x+0.0759	1~5000	0.97254	Dimethylamine
G53_q	y=0.0001361x+0.0492	0.5~1000	0.99826	N-Acetylserine
G335_q	y=0.0352679x+0.0477	0.05~1000	0.96645	Vitamin B1
G275_q	y=0.0012441x+0.0203	0.05~1000	0.99457	5-Hydroxy-tryptophan
G47_q	y=0.0003193x+0.0882	0.5~1000	0.99335	Valine
G58_q	y=0.0002915x+0.0173	0.5~1000	0.97495	Norvaline
G46_q	y=0.0006053x+0.0621	0.5~1000	0.98659	Tyrosine
G24_q	y=0.0012926x+0.0907	0.05~1000	0.98722	Dimethylglycine
G41_q	y=0.0062895x+0.0999	0.05~1000	0.96694	Pipecolic acid
G364_q	y=0.0000638x+0.0597	0.5~1000	0.95623	Taurine
G377_q	y=0.0040698x+0.0002	0.05~1000	0.97517	Imidazole Propionate
G42_q	y=0.0028315x+0.0569	0.05~1000	0.9897	Proline
G265_q	y=0.0008907x+0.0021	0.5~1000	0.97887	Threonic acid
G52_q	y=0.0002966x+0.0948	0.5~1000	0.96871	N-Acetylglutamine
G356_q	y=0.0269091x+0.0728	0.05~1000	0.96462	Trimethylamine-N-oxide
G55_q	y=0.0000543x-0.0705	0.5~1000	0.95359	Pyroglutamic acid
G152_q	y=0.0000514x-0.0493	0.5~1000	0.97503	Glyceric acid
G147_q	y=0.0005378x+0.0493	0.5~1000	0.95324	Erythronic acid
G372_q	y=0.0000234x+0.0292	1~5000	0.95588	Hydroxyproline
G21_q	y=0.0001201x+0.0889	1~5000	0.96532	Alanine
G56_q	y=0.000121x+0.0938	1~5000	0.9949	Sarcosine
G20_q	y=0.0000673x+0.0373	1~5000	0.95505	Beta-Alanine
G158_q	y=0.0009553x+0.0791	0.5~1000	0.97654	Ribonic acid
G361_q	y=0.0110113x+0.0717	0.05~1000	0.99746	Carnitine
G26_q	y=0.0002362x+0.0403	0.5~1000	0.99663	Guanidoacetic acid
G44_q	y=0.0011449x-0.0324	0.05~1000	0.9923	Threonine
G57_q	y=0.000369x-0.0289	0.5~1000	0.96782	Homoserine
G279_q	y=0.0008632x-0.0043	0.5~1000	0.95591	Quinic acid
G2_q	y=0.0000081x+0.03612	1~5000	0.96546	Glycine
G188_q	y=0.0007498x+0.0568	0.5~1000	0.9903	Aminocaproic acid
G15_q	y=0.0000768x+0.0619	0.5~1000	0.96309	5-Aminolevulinic acid
G32_q	y=0.0005842x+0.0515	0.05~1000	0.96969	Histidine
G1_q	y=0.0001221x+0.0732	0.5~1000	0.97638	Gamma-Aminobutyric acid
G25_q	y=0.0000363x+0.4501	0.5~1000	0.99786	Glycylproline
G6_q	y=0.0001396x-0.0301	0.5~1000	0.98423	Glutamine
G43_q	y=0.000041x+0.0981	0.5~1000	0.96887	Serine
G280_q	y=0.0003818x+0.0722	0.5~1000	0.99964	Shikimic acid
G33_q	y=0.0007902x-0.0134	0.5~1000	0.98118	Homocitrulline
G30_q	y=0.0004684x-0.0033	0.5~1000	0.99337	Asparagine
G277_q	y=0.0017855x+0.0033	0.05~1000	0.98709	S-Adenosylhomocysteine
G153_q	y=0.0009779x+0.0947	0.5~1000	0.99921	Lactulose
G22_q	y=0.0036108x+0.0041	0.05~1000	0.97792	Citrulline
G156_q	y=0.0000315x+0.0797	1~5000	0.99371	N-Acetylneuraminic acid
G296_q	y=0.0007708x-0.0008	0.5~1000	0.99874	α-Ketoglutaric acid
G143_q	y=0.0000593x+0.0708	1~5000	0.98064	D-Maltose
G161_q	y=0.0003386x+0.0355	0.5~1000	0.95958	Trehalose
G253_q	y=0.0008793x+0.0575	0.5~1000	0.98974	Itaconic acid
G213_q	y=0.0022741x+0.0905	0.05~1000	0.96038	Methylsuccinic acid
G249_q	y=0.0023917x+0.0566	0.05~1000	0.99455	Glutaric acid
G321_q	y=0.0020422x+0.0956	0.05~1000	0.98253	Quinolinic Acid
G281_q	y=0.0080431x-0.4082	0.05~1000	0.9692	Anserine
G314_q	y=0.0000003x+0.0405	10~10000	0.99618	Adenosylcobalamin
G195_q	y=0.0028141x+0.0492	0.05~1000	0.95744	Citramalic acid
G248_q	y=0.0007973x+0.0346	0.5~1000	0.99393	Glutaconic acid
G155_q	y=0.0000831x+0.0719	0.5~1000	0.99724	Melibiose
G282_q	y=0.0005986x+0.0373	0.5~1000	0.96865	Carnosine
G258_q	y=0.00294x+0.0886	0.05~1000	0.99865	Malonic acid
G11_q	y=0.002511x-0.0025	0.05~1000	0.96326	2,3-Diaminopropionic acid
G264_q	y=0.0012803x+0.0305	0.05~1000	0.98754	Succinic acid
G5_q	y=0.0010823x+0.0608	0.05~1000	0.95248	Glutamic acid
G50_q	y=0.0040403x+0.0676	0.05~1000	0.97197	N-Acetyaspartic acid
G245_q	y=0.0037419x+0.0874	0.05~1000	0.96375	D-2-Hydroxyglutaric acid
G31_q	y=0.0003803x+0.0198	0.5~1000	0.99819	Aspartic acid
G299_q	y=0.0002361x+0.0467	0.5~1000	0.98239	Riboflavin-5′-monophosphate
G309_q	y=0.0000028x+0.0056	1~5000	0.9883	1,4-Dihydronicotinamide adenine dinucleotide
G60_q	y=0.0012002x+0.0903	0.05~1000	0.99742	5-Glutamyalanine
G256_q	y=0.0043999x+0.0065	0.05~1000	0.95926	Malic acid
G19_q	y=0.0007861x+0.0967	0.5~1000	0.99998	Aminoadipic acid
G260_q	y=0.0000887x+0.0965	0.5~1000	0.97413	Oxalic acid
G160_q	y=0.0002167x+0.0134	0.5~1000	0.9804	Tartaric acid
G154_q	y=0.0000071x+0.0267	1~5000	0.9515	Maltotriose
G4_q	y=0.0023458x-0.0023	0.05~1000	0.99893	Cystine
G312_q	y=0.0000028x+0.0716	1~5000	0.99854	AcetyCoA
G342_q	y=0.0005766x+0.0649	0.05~1000	0.97924	Hydroxocobalamin
G29_q	y=0.0015227x-0.0716	0.05~1000	0.9507	Arginine
G276_q	y=0.0000566x-0.0649	0.5~1000	0.96962	Adenosine monophosphate （AMP）
G301_q	y=0.0000631x+0.0243	0.5~1000	0.95137	Dihydroxyacetone phosphate
G305_q	y=0.0000041x+0.0304	1~5000	0.96302	β-Nicotinamide adenine dinucleotide (NAD)
G10_q	y=0.0002077x+0.0518	0.5~1000	0.98734	Ornithine
G61_q	y=0.0000065x+0.0682	1~5000	0.96488	Cysteine
G150_q	y=0.0002711x+0.0891	0.05~1000	0.97721	Glucaric acid
G376_q	y=0.0000948x+0.0293	0.5~1000	0.99956	Vitamin B9
G37_q	y=0.0004837x-0.0005	0.05~1000	0.99227	Lysine
G243_q	y=0.0011611x+0.0567	0.05~1000	0.97903	cis-Aconitic acid
G16_q	y=0.0000492x+0.0272	0.5~1000	0.98231	5-Hydroxylysine
G306_q	y=0.0000505x+0.0707	0.5~1000	0.95048	Adenosine-5′-diphosphate
G278_q	y=0.0000863x+0.0947	0.5~1000	0.959	Guanosine monophosphate （GMP）
G252_q	y=0.0001123x+0.0297	0.5~1000	0.95462	Isocitric acid
G244_q	y=0.0006233x+0.0583	0.05~1000	0.98264	Citric acid
G302_q	y=0.0000413x+0.0795	0.5~1000	0.96967	3-Phosphoglycerate
G163_q	y=0.0001546x+0.0347	0.5~1000	0.97057	Glucose 6-phosphate （G6P）
G332_q	y=0.0000156x+0.0759	0.5~1000	0.95801	GlutaryCoA
G313_q	y=0.0000001x+0.0005	1~5000	0.98951	SuccinyCoA
G304_q	y=0.0000448x-0.0759	0.5~1000	0.97015	Adenosine-5′-triphosphate
G317_q	y=0.0000042x-0.0005	1~5000	0.9954	MalonyCoA
G297_q	y=0.0000724x-0.1273	0.5~1000	0.96015	Guanosine diphosphate
G298_q	y=0.0000292x+0.0605	0.5~1000	0.99293	Thiamine pyrophosphate
G308_q	y=0.0000043x+0.0826	1~5000	0.96121	β-Nicotinamide adenine dinucleotide phosphate (NADP)
G307_q	y=0.0000001x+0.0003	10~10000	0.96938	Dihydronicotinamide-adenine dinucleotide phosphate
G295_q	y=0.0000148x+0.0984	0.5~1000	0.97765	Guanosine-5'-tridiphosphate
G149_q	y=0.0000421x+0.0294	0.5~1000	0.96257	Fructose 1,6-bisphosphate （F1,6BP）
G382_q	y=0.0000535x+0.0698	0.5~1000	0.98824	1,3-Diaminopropane
G64_q	y=0.0000534x+0.0576	0.5~1000	0.96671	Putreanine
L0130	y=0.0001104x-0.0001	1~5000	0.96637	Hydroxyisocaproic acid
L0198	y=0.0007745x+0.0035	1~5000	0.97224	3,7-Dimethyluric acid
L0232	y=0.0004698x+0.0308	1~5000	0.9729	Propionylglycine
L0234	y=0.000162x+0.0305	1~5000	0.98133	Dephosphocoenzyme A (Dephospho-CoA)
L0356	y=0.0010241x+0.0898	0.5~1000	0.96231	N-Carbamoyaspartic acid
L0421	y=0.0000021x+0.0768	10~10000	0.98512	N6-Acetylysine
S0084	y=0.0000682x+0.0358	1~5000	0.96633	N-Acetylaspartylglutamic acid (NAAG)
S0201	y=0.0000279x+0.0186	1~5000	0.99932	Allantoic acid
S0292	y=0.0000311x+0.0094	1~5000	0.96207	gamma-Glutamyphenylalanine
S103_q	y=0.0000094x+0.0791	1~5000	0.98672	Glucuronolactone
S106_q	y=0.0000003x+0.0439	10~10000	0.95283	D-Threitol
S114_q	y=0.0000444x+0.0842	1~5000	0.98823	4-Pyridoxic acid
S12_q	y=0.0000008x+0.0395	10~10000	0.9528	Uric acid
S120_q	y=0.0001734x-0.0002	1~5000	0.98788	1-Methyladenosine
S121_q	y=0.0000059x+0.0067	10~10000	0.97046	Deoxyuridine
S13_q	y=0.0001464x+0.0676	1~5000	0.99311	Cytidine
S174_q	y=0.0000007x+0.0882	10~10000	0.98303	Erythritol
S191_q	y=0.0000902x+0.0653	1~5000	0.97191	5-Methylcytosine
S197_q	y=0.0000024x-0.0247	10~10000	0.96706	Methyl beta-D-glucopyranoside
S20_q	y=0.0000927x+0.0885	1~5000	0.99768	Inosine
S212_q	y=0.0001457x+0.0699	1~5000	0.98966	p-Octopamine
S216_q	y=0.0000845x+0.0467	1~5000	0.99685	Pyridoxamine
S22_q	y=0.0003023x+0.0897	1~5000	0.96681	Cytosine
S223_q	y=0.000017x+0.0249	1~5000	0.96941	Deoxyguanosine
S224_q	y=0.0001664x-0.0897	1~5000	0.96513	Orotic acid
S235_q	y=0.0000075x-0.0429	10~10000	0.99623	Homocysteine thiolactone
S239_q	y=0.0000129x-0.0606	1~5000	0.96852	Adenine
S263_q	y=0.0000551x-0.0786	1~5000	0.97041	Deoxyadenosine
S267_q	y=0.000015x-0.0267	1~5000	0.96288	2,4-Dihydroxypteridine
S269_q	y=0.0000029x-1.2357	10~10000	0.97709	Acetylcysteine
S273_q	y=0.0002652x-0.0003	1~5000	0.97111	Aniline-2-sulfonate
S283_q	y=0.0001114x-0.0318	1~5000	0.99187	Adenosine
S3_q	y=0.0000046x+0.0373	10~10000	0.96539	Hypotaurine
S304_q	y=0.0001356x+0.0097	1~5000	0.99495	Methyl 4-aminobutyrate
S327_q	y=0.0000084x+0.0564	1~5000	0.99829	3,4-Dihydroxyphenylglycol
S375_q	y=0.0000078x+0.0236	10~10000	0.98078	p-Aminobenzoic acid
S383_q	y=0.000006x+0.0614	10~10000	0.96438	Tryptophanamide
S406_q	y=0.0000248x+0.0206	1~5000	0.9663	2-Hydroxypyridine
S42_q	y=0.000038x+0.0114	1~5000	0.9681	Thymidine
S429_q	y=0.0000024x+0.0469	10~10000	0.96938	Pterin
S431_q	y=0.0000055x-0.0114	10~10000	0.95073	2-Aminophenol
S435_q	y=0.0000428x-0.0469	1~5000	0.98455	3-Amino-4-hydroxybenzoate
S443_q	y=0.0000109x-0.0268	1~5000	0.98472	Quinoline-4-carboxylic acid
S46_q	y=0.0000506x+0.0083	1~5000	0.99847	Xanthine
S460_q	y=0.0000022x+0.0259	10~10000	0.99574	2,6-Dihydroxypyridine
S461_q	y=0.0000003x+0.0813	10~10000	0.98378	Vanillin
S471_q	y=0.0000287x+0.0639	1~5000	0.99335	Mevalonic acid
S476_q	y=0.0000267x+0.0344	1~5000	0.9521	Salsolinol
S482_q	y=0.0000415x+0.0057	1~5000	0.95526	Homogentisic acid
S491_q	y=0.0000885x+0.0401	1~5000	0.97896	3-Methyladenine
S516_q	y=0.0000052x-0.0401	10~10000	0.98992	Gulonolactone
S517_q	y=0.0000016x-0.0249	10~10000	0.98373	D-Arabinose
S522_q	y=0.0000017x-0.0052	10~10000	0.97266	D-Ribose
S53_q	y=0.0000392x-0.0338	1~5000	0.96975	Thymine
S56_q	y=0.0000055x+0.0781	10~10000	0.95997	Uridine
S63_q	y=0.0000095x-1.2997	1~5000	0.96518	Uracil
S64_q	y=0.0000025x-3.5874	10~10000	0.95599	Thiourea
S67_q	y=0.0000329x+0.0153	1~5000	0.99115	Hypoxanthine
S7_q	y=0.00016x+0.0944	1~5000	0.97794	Purine
S78_q	y=0.0000019x+0.0578	10~10000	0.99965	Guanine
S80_q	y=0.0003893x+0.0515	1~5000	0.9529	Pyridoxine
S87_q	y=0.0000031x+0.0559	10~10000	0.98242	Deoxycytidine
S0131	y=0.0000901x+0.0243	1~5000	0.96347	N6-methyladenosine
S0189	y=0.0000212x+0.0451	1~5000	0.99937	7-methylguanosine
S111_q	y=0.0002196x+0.053	1~5000	0.95202	1-Methylhistidine
S134_q	y=0.0000058x+0.0032	1~5000	0.9894	1-Aminocyclopropanecarboxylic acid
S156_q	y=0.00001x+0.0294	1~5000	0.98973	N-Acetylasparagine
S193_q	y=0.0000398x+0.0902	1~5000	0.96261	Cytidine 2',3'-cyclic phosphate
S272_q	y=0.0000304x+0.0839	1~5000	0.97194	2-Aminoisobutyric acid
S340_q	y=0.0000066x+0.0523	1~5000	0.97218	Galactosamine
S419_q	y=0.000492x+0.0682	0.5~1000	0.99069	Ethylmalonic acid
S465_q	y=0.0000645x+0.0618	1~5000	0.95078	GeranyPP
S69_q	y=0.0000026x+0.0398	10~10000	0.97687	Dopa
S0249	y=0.000435x+0.0675	0.5~1000	0.95853	Sepiapterin
S149_q	y=0.0000003x+0.0885	10~10000	0.9782	3-MethylcrotonyCoA
S161_q	y=0.0000338x+0.0204	1~5000	0.99946	Isopentenyl pyrophosphate
S163_q	y=0.0000273x+0.0943	1~5000	0.99233	dTDP-glucose
S173_q	y=0.0000188x+0.0474	1~5000	0.96755	S-Adenosylmethionine
S175_q	y=0.0000388x+0.0633	0.5~1000	0.99865	2-Amino-2-deoxy-D-gluconate
S184_q	y=0.0000363x+0.0222	1~5000	0.99892	Dimethylallyl diphosphate
S218_q	y=0.0000185x+0.0003	1~5000	0.96112	Deoxyuridine monophosphate
S222_q	y=0.0000094x+0.0486	1~5000	0.98142	FAD
S243_q	y=0.0000006x+0.0628	1~5000	0.97875	Glutathione Reduced
S245_q	y=0.0001274x+0.0769	0.5~1000	0.99177	Asymmetric dimethylarginine
S278_q	y=0.0000174x+0.0668	1~5000	0.96014	Thymideine-monophosphate
S284_q	y=0.000004x+0.0529	1~5000	0.98347	Raffinose
S285_q	y=0.0000214x+0.0254	1~5000	0.99116	meso-Tartaric acid
S293_q	y=0.0000035x+0.0744	1~5000	0.96364	Galacturonic acid
S323_q	y=0.0001006x+0.0037	0.5~1000	0.969	Ophthalmic acid
S43_q	y=0.0000006x+0.0951	1~5000	0.99493	Cysteinylglycine
S439_q	y=0.0000361x+0.0709	1~5000	0.9994	Beta-Glycerophosphoric acid
S456_q	y=0.0000028x+0.0235	1~5000	0.98469	Porphobilinogen
S81_q	y=0.0000943x+0.5411	0.5~1000	0.956	Deoxyadenosine monophosphate
S93_q	y=0.0000048x-6.221	1~5000	0.98502	Homocysteine
L0213	y=0.0022897x-0.0023	0.05~1000	0.99676	5-Methoxytryptamine
L0331	y=0.0004238x+0.0507	0.5~1000	0.96285	Adenosine 5'-phosphosulfate (APS)
S107_q	y=0.0000051x+0.0023	1~5000	0.99834	Glucosamine
S112_q	y=0.0000091x-0.0507	1~5000	0.97306	Galactitol
S116_q	y=0.0017409x-0.0435	0.05~1000	0.98575	Methylguanidine
S123_q	y=0.0002995x-0.0098	0.5~1000	0.95441	Urocanic acid
S125_q	y=0.0002302x+0.0885	0.5~1000	0.99703	4-Acetamidobutanoic acid
S148_q	y=0.000275x+0.0975	0.5~1000	0.96565	Xanthosine
S150_q	y=0.0001838x+0.0568	0.5~1000	0.97037	Thyrotropin releasing hormone
S177_q	y=0.0009763x+0.0413	0.5~1000	0.95529	2-Keto-3-deoxy-D-gluconic acid
S181_q	y=0.0015458x-0.0417	0.05~1000	0.99979	Adenosine 2',3'-cyclic phosphate
S187_q	y=0.0024907x+0.0647	0.05~1000	0.98582	Acetylcarnitine
S234_q	y=0.0000257x+0.0592	1~5000	0.97249	Cyclic GMP
S248_q	y=0.0001526x+0.0478	0.5~1000	0.98034	Histamine
S261_q	y=0.0000032x-0.0478	1~5000	0.97348	D-Mannosamine
S264_q	y=0.000601x+0.0113	0.5~1000	0.96674	N-Acetylputrescine
S268_q	y=0.0000886x+0.0143	0.5~1000	0.99671	6-Hydroxynicotinic acid
S277_q	y=0.0003166x+0.0498	0.5~1000	0.9663	Histidinol
S279_q	y=0.0000167x+0.0922	1~5000	0.96606	Ureidopropionic acid
S282_q	y=0.0000167x+0.0178	1~5000	0.99074	N-Formylglycine
S289_q	y=0.0000221x+0.0927	1~5000	0.97245	3-Methoxytyrosine
S292_q	y=0.0001888x+0.0783	0.5~1000	0.95651	Imidazoleacetic acid
S295_q	y=0.0000797x-0.0001	0.5~1000	0.97426	Cyclic AMP
S299_q	y=0.0002005x-0.0391	0.5~1000	0.95329	Glucosamine 6-sulfate
S301_q	y=0.0003783x+0.0434	0.5~1000	0.95634	3-Methylhistamine
S325_q	y=0.0002117x+0.0794	0.5~1000	0.98245	Trigonelline
S33_q	y=0.0003663x+0.0639	0.5~1000	0.98228	4,5-Dihydroorotic acid
S4_q	y=0.000192x+0.0077	0.5~1000	0.98721	N-Methyalanine
S438_q	y=0.0000333x+0.0098	1~5000	0.96952	Dihydrobiopterin
S50_q	y=0.0020455x+0.0886	0.05~1000	0.95456	Diethanolamine
S511_q	y=0.0000126x+0.0043	1~5000	0.98613	Mannitol
S513_q	y=0.0000042x+0.0186	1~5000	0.96003	Sorbitol
S524_q	y=0.0000316x+0.0147	1~5000	0.99146	D-Pinitol
S70_q	y=0.0000052x+0.0674	1~5000	0.95699	Guanosine
S9_q	y=0.0000546x+0.0592	0.5~1000	0.98575	N-Acetylmannosamine
S91_q	y=0.0006671x+0.0078	0.5~1000	0.95218	3-Dehydroshikimate
S84_q	y=0.0001352x+0.0836	0.5~1000	0.97543	3-Methyhistidine
S180_q	y=0.0013546x+0.0272	0.05~1000	0.98656	4-Trimethylammoniobutanoic acid
S254_q	y=0.0000077x+0.0786	1~5000	0.96504	Uracil 5-carboxylate
S259_q	y=0.000167x-0.0786	0.5~1000	0.99631	4-Guanidinobutanoic acid
S296_q	y=0.0001024x+0.0043	0.5~1000	0.98996	Methionine sulfoximine
S297_q	y=0.0000251x+0.1827	1~5000	0.98691	cis-4-Hydroxy-D-proline
L0011	y=0.0000552x+0.0038	0.5~1000	0.97114	gamma-Glutamyvaline
L0051	y=0.0000089x+0.0815	1~5000	0.97966	5-Amino-4-carbamoylimidazole (AICA)
L0059	y=0.0000593x+0.0019	0.5~1000	0.98575	Sucrose
L0068	y=0.0001594x-0.0002	0.5~1000	0.99486	Flavone
L0069	y=0.0000118x+0.0489	0.5~1000	0.98302	Methionine sulfoxide
L0084	y=0.0000107x+0.0318	1~5000	0.97354	Glycerophosphocholine
L0101	y=0.0000018x+0.0678	1~5000	0.99727	Abrine
L0109	y=0.0000663x+0.0479	0.5~1000	0.95435	2-Hydroxyadenine
L0113	y=0.0000998x+0.0336	0.5~1000	0.95023	D2-Aminooctanoic acid
L0173	y=0.0000008x+0.0468	1~5000	0.96003	N-Acetylcadaverine
L0177	y=0.0000082x-0.0227	1~5000	0.95465	Nicotinuric acid
L0249	y=0.0000089x+0.0264	1~5000	0.96896	Deoxycytidine triphosphate (dCTP)
L0306	y=0.000002x+0.0277	1~5000	0.97255	D-glucosamine 1-phosphate
L0383	y=0.0000032x+0.0021	1~5000	0.96667	Isobutyryl coenzyme A (IsobutyryCoA)
L0407	y=0.0000467x-0.0761	0.5~1000	0.98109	Argininosuccinic acid
L0408	y=0.0000084x+0.0145	1~5000	0.9829	2-keto-D-Gluconic acid
L0410	y=0.0000198x+0.5778	0.5~1000	0.97188	Cholesterol sulfate
S0033	y=0.0000865x+0.0731	0.5~1000	0.96765	Naringin
S0102	y=0.0000146x-0.0761	0.5~1000	0.97763	5-Methoxydimethyltryptamine
S0106	y=0.0002112x+0.0887	0.5~1000	0.97263	N2,N2-Dimethylguanosine
S0183	y=0.0000198x+0.0297	0.5~1000	0.98631	2'-O-methyladenosine
S118_q	y=0.0000003x+0.0102	1~5000	0.98142	3-Hydroxy-3-methylglutaryCoA
S133_q	y=0.0000519x+0.0853	0.5~1000	0.96385	Phosphoserine
S139_q	y=0.0000021x+0.0687	1~5000	0.96582	Phosphonoacetate
S155_q	y=0.0000079x+0.0041	1~5000	0.98762	Nicotinic acid adenine dinucleotide phosphate
S160_q	y=0.0000131x+0.3657	0.5~1000	0.95472	6-Phosphogluconic acid
S166_q	y=0.0000022x+0.0231	1~5000	0.97359	dGTP
S169_q	y=0.0000039x+0.0328	1~5000	0.97942	IDP
S176_q	y=0.0000001x+0.0208	10~10000	0.99211	Uridine triphosphate
S182_q	y=0.0000017x+0.0817	1~5000	0.9915	Mevalolactone
S183_q	y=0.0000311x+0.0478	0.5~1000	0.99386	Galactose 1-phosphate
S185_q	y=0.000008x+0.0237	1~5000	0.97341	Deoxyuridine triphosphate
S186_q	y=0.0000911x+0.0617	0.5~1000	0.96266	Phosphorylcholine
S190_q	y=0.000016x+0.0213	0.5~1000	0.96246	dGDP
S200_q	y=0.0000328x+0.0462	0.5~1000	0.98932	Phosphoenolpyruvic acid
S206_q	y=0.000078x+0.0249	0.5~1000	0.96138	Cytidine monophosphate
S207_q	y=0.0000021x+0.0636	1~5000	0.96058	Guanosine diphosphate mannose
S210_q	y=0.0000029x+0.0443	1~5000	0.99534	Adenosine 3',5'-diphosphate
S221_q	y=0.0000179x-0.0636	0.5~1000	0.98993	Xanthosine monophosphate
S244_q	y=0.0000108x-0.0443	0.5~1000	0.99241	Uridine diphosphate glucuronic acid
S246_q	y=0.0000055x-0.0687	1~5000	0.95655	CDP
S253_q	y=0.0000523x-0.2401	0.5~1000	0.96203	Thiamine monophosphate
S294_q	y=0.0000009x+0.0754	1~5000	0.95774	Cytidine triphosphate
S332_q	y=0.0000117x+0.0798	0.5~1000	0.96709	ITP
S335_q	y=0.0000019x+0.0985	1~5000	0.97192	Stachyose
S336_q	y=0.0000135x+0.0956	0.5~1000	0.99292	Deoxycytidine-diphosphate
S341_q	y=0.0000079x+0.0966	1~5000	0.98206	Deoxyadenosine triphosphate
S346_q	y=0.0000049x+0.0393	1~5000	0.96792	Uridine 5'-diphosphate
S40_q	y=0.0000404x+0.0533	0.5~1000	0.96428	2-Phosphoglyceric acid
S440_q	y=0.0000241x+0.0779	0.5~1000	0.97985	Glucose 1-phosphate
S89_q	y=0.000016x+0.0828	0.5~1000	0.95693	Glucosamine 6-phosphate
YRL32_q	y=0.000006x+0.0398	1~5000	0.99732	Oxidized glutathione
YRL5_q	y=0.0000022x-0.0131	1~5000	0.95293	D-Sedoheptulose 7-phosphate
YRL72_q	y=0.0000005x+0.0675	1~5000	0.96252	Xylulose 5-phosphate
S0250	y=0.0000973x+0.0533	0.5~1000	0.98489	Hordenine
S104_q	y=0.0000442x+0.0802	0.5~1000	0.99553	Ciliatine
S11_q	y=0.0000551x+0.0571	0.5~1000	0.97095	trans-Aconitic acid
S117_q	y=0.0000031x+0.0993	1~5000	0.98246	Deoxy-GMP
S131_q	y=0.0000771x+0.0699	0.5~1000	0.97985	Citicoline
S136_q	y=0.0000006x+0.0736	1~5000	0.96027	Cystathionine
S153_q	y=0.0000209x+0.0758	0.5~1000	0.95247	Galactaric acid
S172_q	y=0.0000377x+0.0434	0.5~1000	0.95668	Nicotinamide hypoxanthine dinucleotide
S178_q	y=0.0000008x-0.0434	1~5000	0.99529	D-Sedoheptulose
S194_q	y=0.0003089x+0.0507	0.05~1000	0.99782	Trimethyllysine
S196_q	y=0.0000473x+0.0513	0.5~1000	0.96004	Uridine diphosphate glucose
S198_q	y=0.0000014x+0.0811	1~5000	0.97544	Pyridoxal Phosphate
S201_q	y=0.0000156x+0.0517	0.5~1000	0.96612	Mannose 6-phosphate
S204_q	y=0.0000094x+0.0352	0.5~1000	0.981	O-Phosphoethanolamine
S208_q	y=0.0000114x+0.0326	0.5~1000	0.99045	ADP-glucose
S209_q	y=0.0000147x+0.2555	0.5~1000	0.98775	Fructose 6-phosphate
S214_q	y=0.0000114x+0.0633	0.5~1000	0.97925	Uridine diphosphategalactose
S231_q	y=0.0000044x+0.0452	1~5000	0.97287	AICAR
S232_q	y=0.0000078x+0.0446	1~5000	0.97325	Uridine diphosphate-N-acetylgalactosamine
S241_q	y=0.0000111x+0.0854	0.5~1000	0.993	Uridine diphosphate-N-acetylglucosamine
S270_q	y=0.0000007x-0.0854	1~5000	0.95279	Inosine-monophosphate
S316_q	y=0.0000619x+0.0088	0.5~1000	0.98605	ADP-ribose
S333_q	y=0.0000447x+0.2844	0.5~1000	0.97581	CDP-Ethanolamine
S338_q	y=0.0000054x+0.0162	1~5000	0.9622	D-Ribose 5-phosphate
S342_q	y=0.0000148x+0.0458	0.5~1000	0.98223	Glycerol 3-phosphate
S437_q	y=0.0000209x+0.0309	0.5~1000	0.9922	2-Methylcitric Acid
S47_q	y=0.0000015x+0.0227	1~5000	0.9662	Dihydrofolic acid
S51_q	y=0.0000151x+0.0882	0.5~1000	0.9593	Uridine 5'-monophosphate
S66_q	y=0.000017x+0.0982	0.5~1000	0.99562	dCMP
S83_q	y=0.0000716x+0.0952	0.5~1000	0.9825	Nicotinamide ribotide
S85_q	y=0.0000674x+0.0633	0.5~1000	0.9852	meso-2,6-Diaminoheptanedioate
S0260	y=0.0000336x+0.0715	1~5000	0.99673	GDP-fucose
S0295	y=0.0000304x-0.0715	1~5000	0.96961	gamma-Glutamymethionine
S100_q	y=0.0001495x-0.0138	0.5~1000	0.95829	O-Succinyhomoserine
S119_q	y=0.0000265x-0.0728	1~5000	0.97271	Glucuronic acid
S122_q	y=0.0000531x-0.0176	1~5000	0.97863	Gluconic acid
S135_q	y=0.0002043x-5.4652	0.5~1000	0.95638	Glutarylcarnitine
S138_q	y=0.0006991x+0.0519	0.5~1000	0.99171	3-Hydroxymethylglutaric acid
S146_q	y=0.0000203x+0.0301	1~5000	0.97757	N-methyglutamic Acid
S151_q	y=0.0001666x+0.0171	0.5~1000	0.96928	Cysteic acid
S152_q	y=0.0003037x+0.0923	0.5~1000	0.9915	N-MethyD-aspartic acid
S213_q	y=0.0004192x+0.0793	0.5~1000	0.96535	N-Alpha-acetyllysine
S266_q	y=0.000108x-0.3401	0.5~1000	0.99283	N-Acetylglutamic acid
S274_q	y=0.0000122x+0.0681	1~5000	0.95184	S-Carboxymethycysteine
S280_q	y=0.0000227x+0.0551	1~5000	0.98617	5-Aminopentanoic acid
S290_q	y=0.0000135x+0.9711	1~5000	0.96474	Lactose
S504_q	y=0.0000213x+0.0855	1~5000	0.96733	myo-Inositol
S518_q	y=0.0000247x+0.0289	1~5000	0.99826	Cellobiose
