# Supplementary material for: Cyclocarya paliurus leaves alleviate high-sucrose diet-induced obesity by improving intestinal metabolic disorders
Source: publisher site journal article supplement (doi:10.18632/aging.205657), 2024-03-14
Supplement: Supplementary file [file aging-v16i6-205657-supplementary-material-SD2.pdf]

## SUPPLEMENTARY TABLES

**Supplementary Table 1. Nutritional ingredients of normal diet.**

| Vitamin              |         | Amino acid |       | Mineral element |        | Ratio of energy |             |
|----------------------|---------|------------|-------|-----------------|--------|-----------------|-------------|
| Vitamin A, IU        | 7800.00 | Met+Cys,g  | 5.80  | Na, g           | 3.10   | Protein         | 23.07%      |
| Vitamin D, IU        | 1200.00 | Lys, g     | 8.90  | Mg, g           | 2.90   | Lipid           | 11.85%      |
| Vitamin E, mg        | 87.00   | Trp, g     | 2.10  | K, g            | 7.40   | Carbohydrate    | 65.08%      |
| Vitamin K, mg        | 5.00    | Arg, g     | 9.90  | Cu, mg          | 11.40  | Total energy    | 3.40 kcal/g |
| Vitamin B1, mg       | 10.00   | Leu, g     | 14.80 | Fe, mg          | 113.70 |                 |             |
| Vitamin B2, mg       | 15.00   | Ile, g     | 7.40  | Mn, mg          | 80.00  |                 |             |
| Vitamin B6, mg       | 10.00   | Thr, g     | 6.60  | Zn, mg          | 31.60  |                 |             |
| Vitamin B12, mg      | 0.02    | Val, g     | 8.90  | Se, mg          | 0.20   |                 |             |
| Niacin, mg           | 55.00   | His, g     | 4.90  | I, mg           | 0.70   |                 |             |
| Pantothenic acid, mg | 22.00   | Phe+Tyr, g | 14.60 |                 |        |                 |             |
| Biotin, mg           | 0.20    |            |       |                 |        |                 |             |
| Choline, mg          | 1250.00 |            |       |                 |        |                 |             |
| Folic acid, mg       | 6.60    |            |       |                 |        |                 |             |

Raw material components: corn, soybean, fish power, flour, yeast power, oil, vitamin and mineral element. Nutritional ingredients(/kg). Above data were offered by Beijing Ke-ao-xie-li Feed Co., Ltd.

**Supplementary Table 2. Specific primers for the qRT-PCR analysis.**

| Gene      | Forward                    | Reverse                   |
|-----------|----------------------------|---------------------------|
| Claudin-1 | F: GCTGGGTTTCATCCTGGCTTCTC | CCTGAGCGGTCACGATGTTGTC    |
| Occludin  | TGGCTATGGAGGCGGCTATGG      | ACTAAGGAAGCGATGAAGCAGAAGG |
| ZO-1      | AACCCGAAACTGATGCTGTGGATAG  | CGCCCTTGGAATGTATGTGGAGAG  |
